# Supplementary material for: Integrated Systems Biology Approach Identifies Novel Maternal and Placental Pathways of Preeclampsia
Source: PubMed Central journal article supplement (PMC6092567; doi:10.3389/fimmu.2018.01661), 2018-08-08

## ARNT2

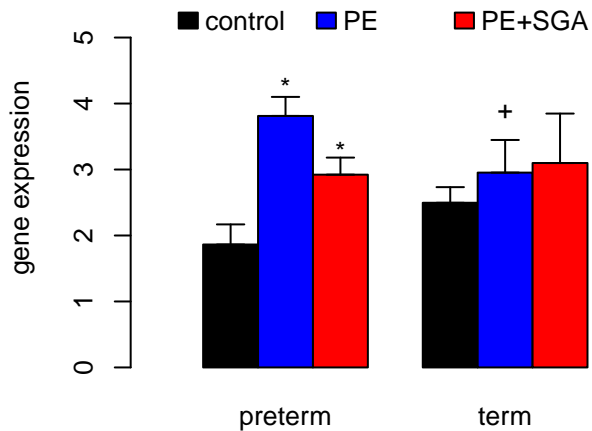

## BCL3

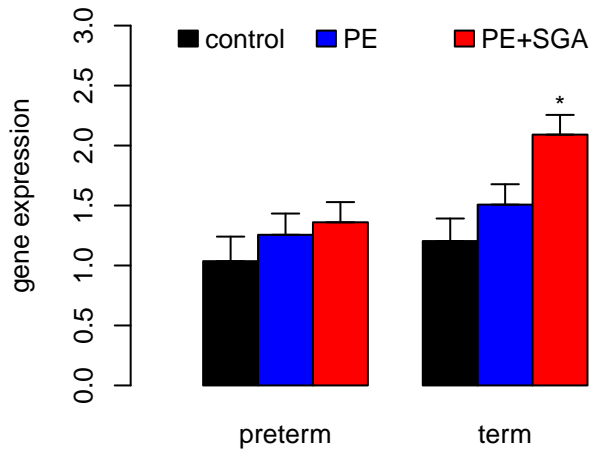

## BCL6

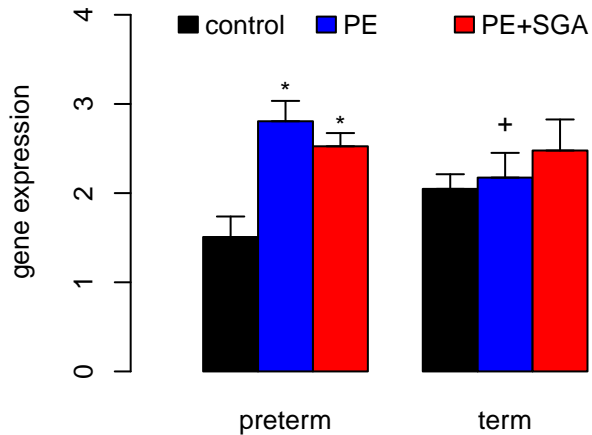

## BTG2

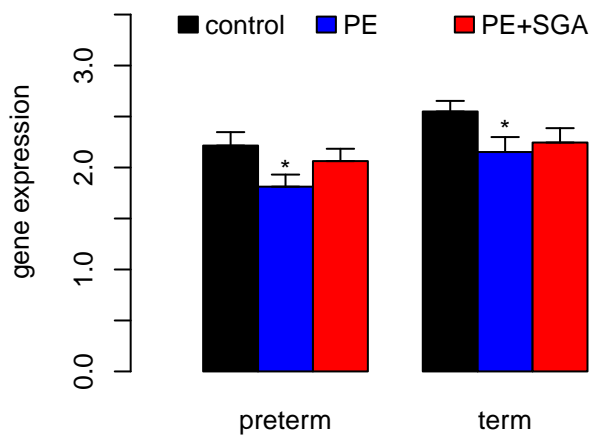

### CDKN1A

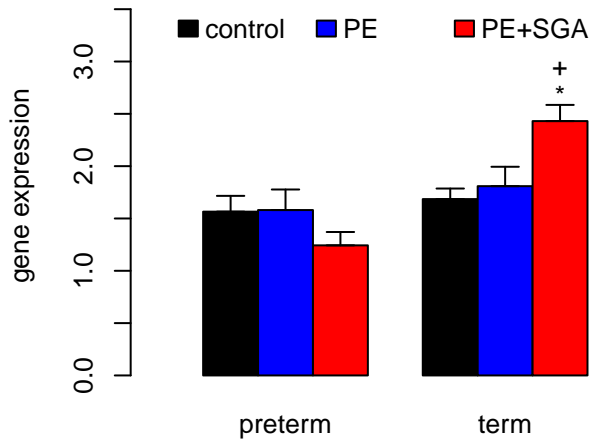

### CGB3

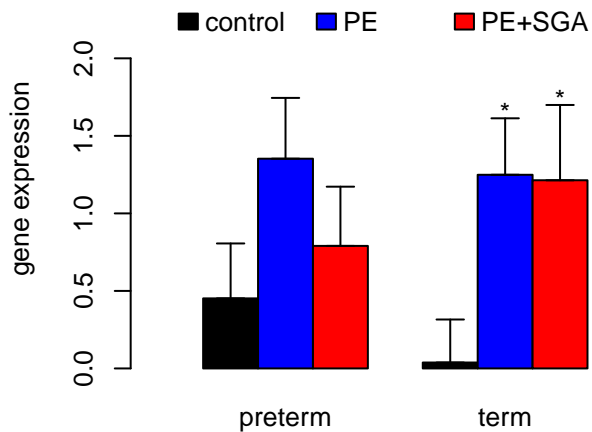

### CLC

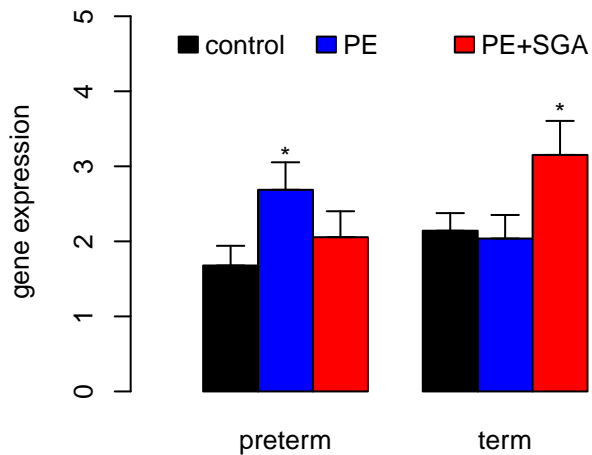

### CLDN1

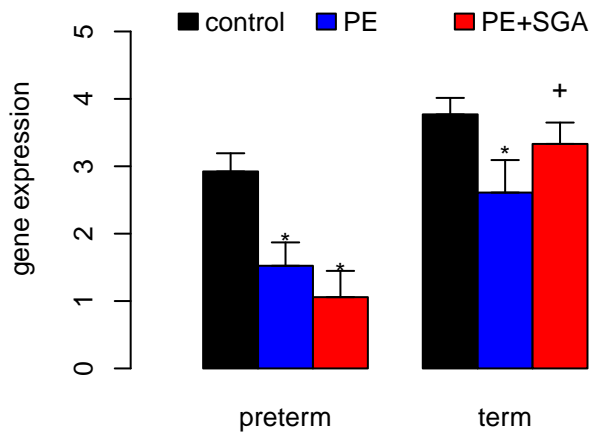

### CRH

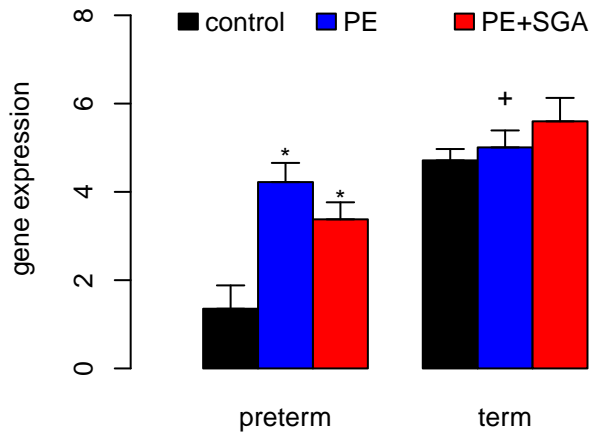

### CSH1

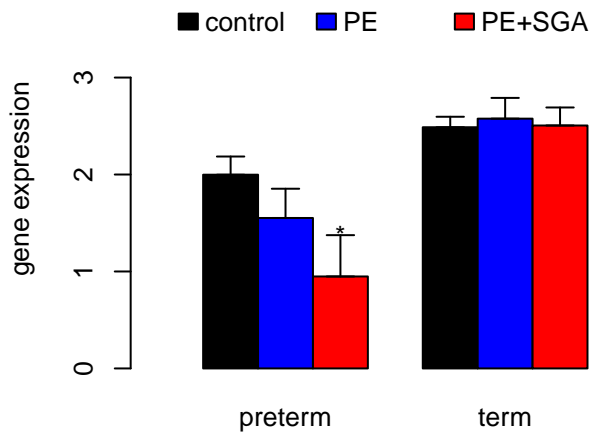

### CYP19A1

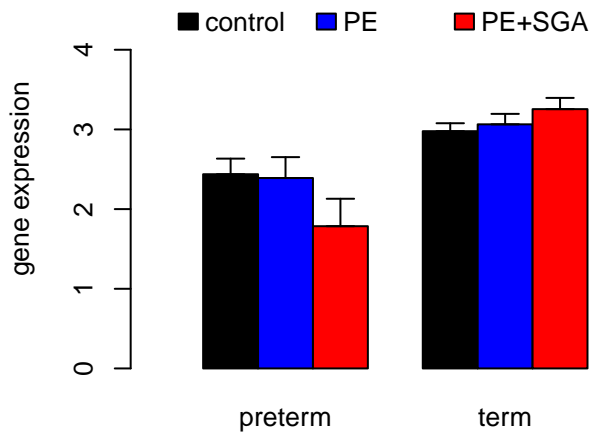

### DUSP1

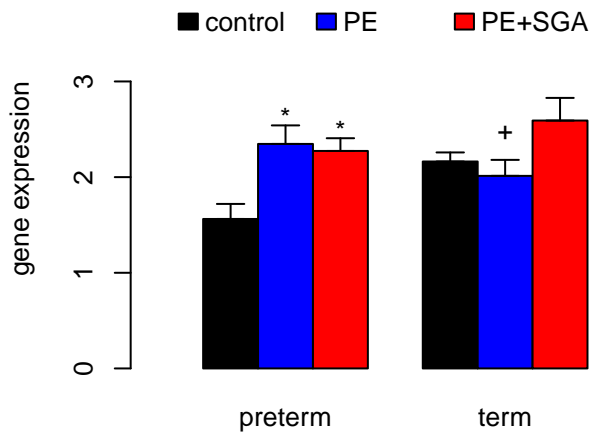

### ENG

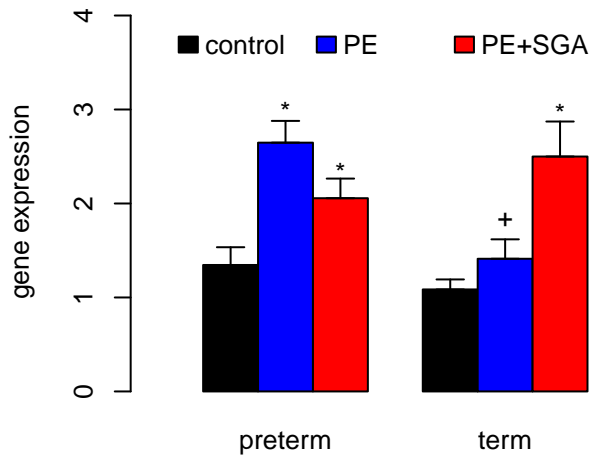

### ERVFRDE1

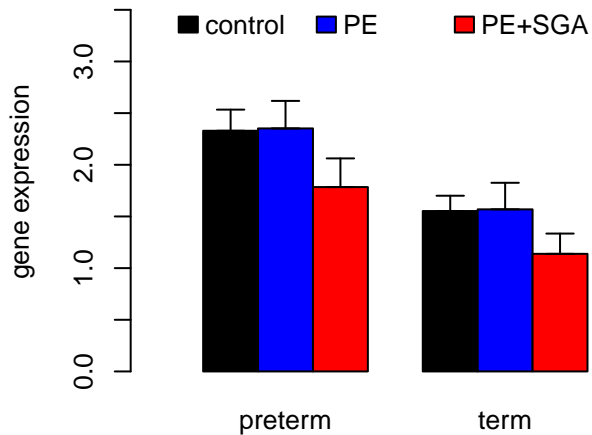

### ERVVE1

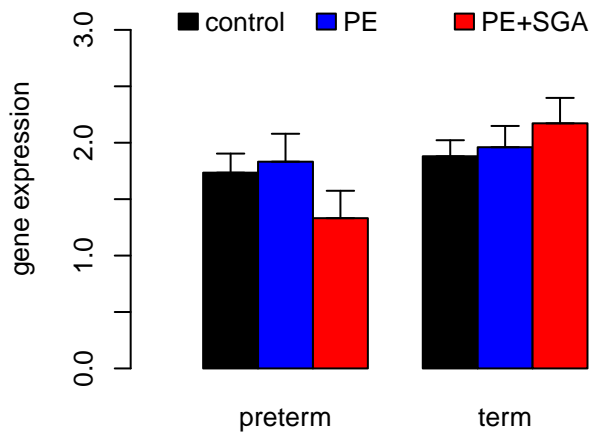

### ESRRG

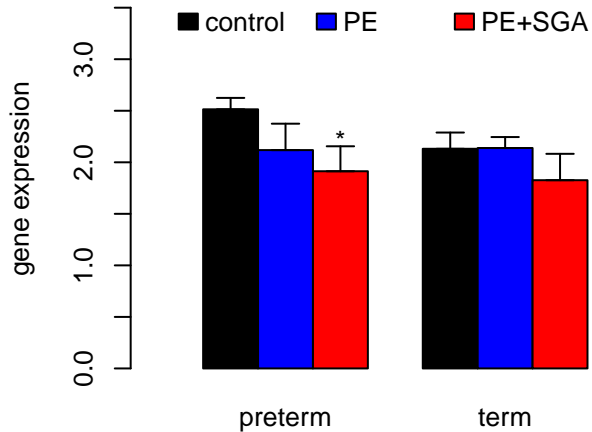

### FBLN1

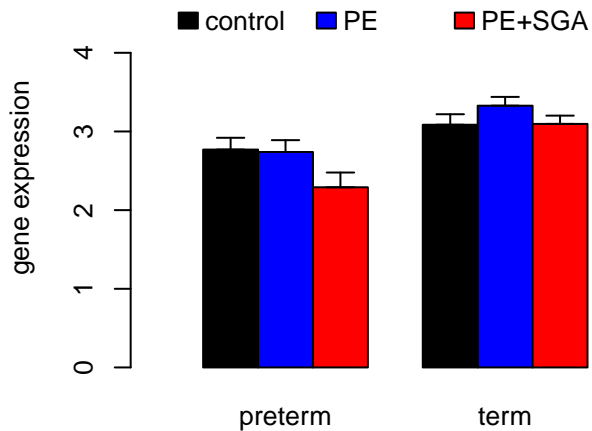

### FLT1

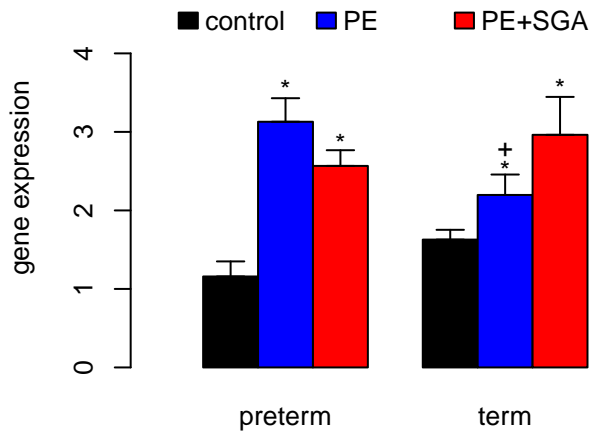

### GATA2

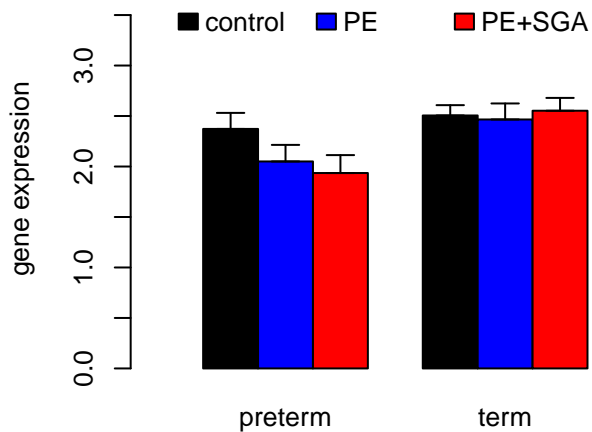

### GCM1

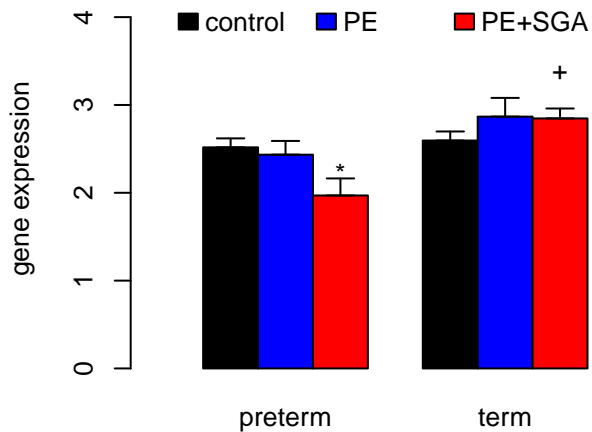

## GH2

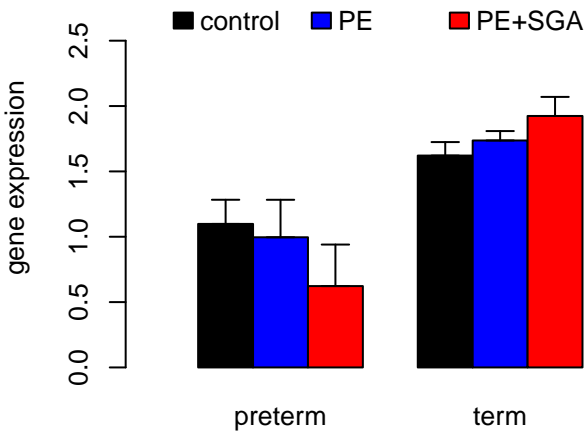

## HLF

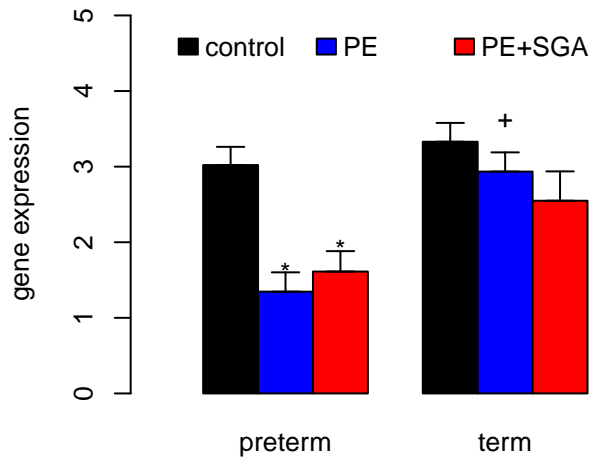

## HSD11B2

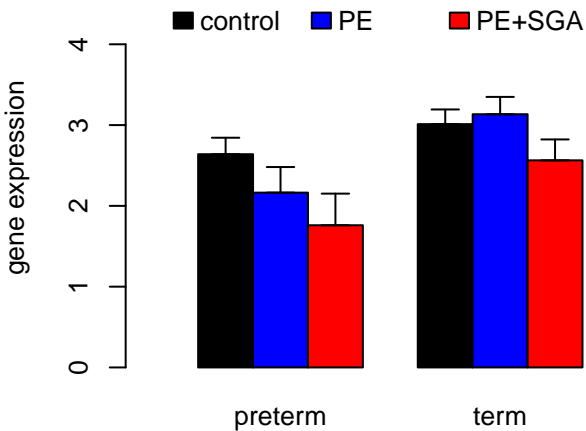

## HSD17B1

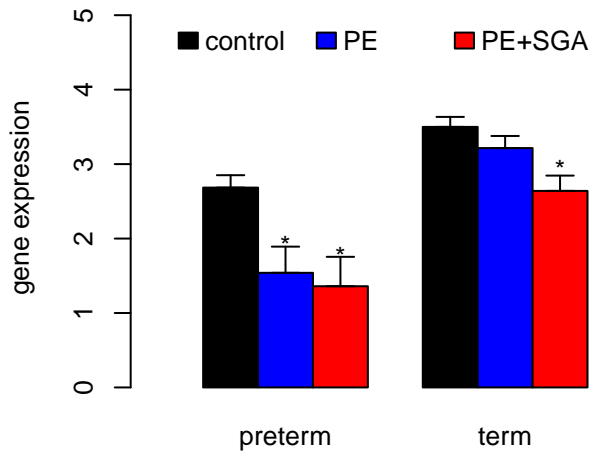

### IKBK

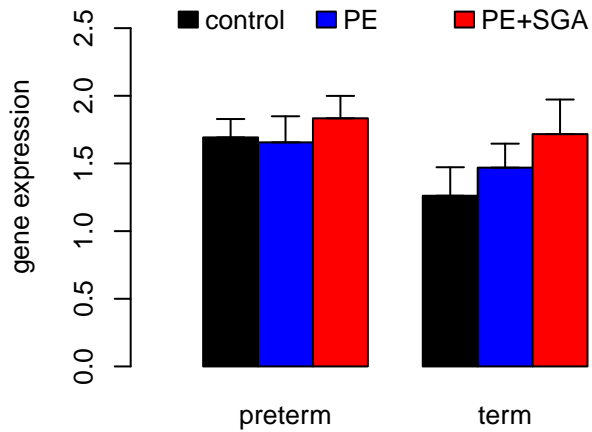

### INSL4

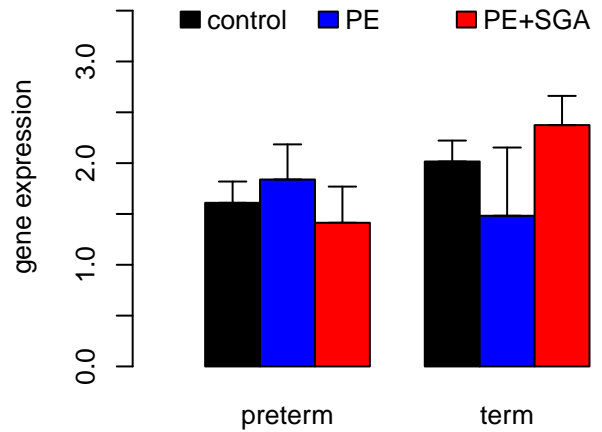

### JUNB

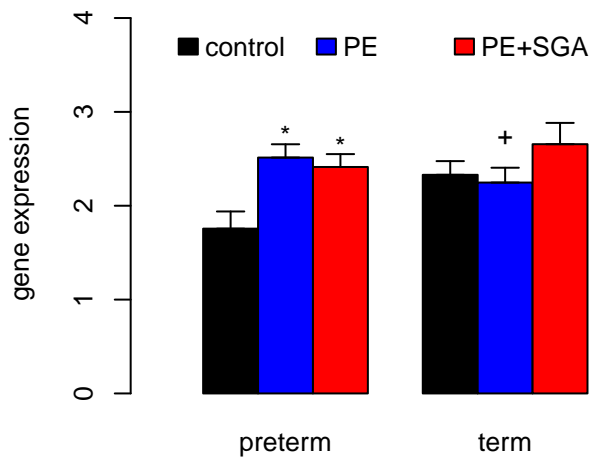

### KIT

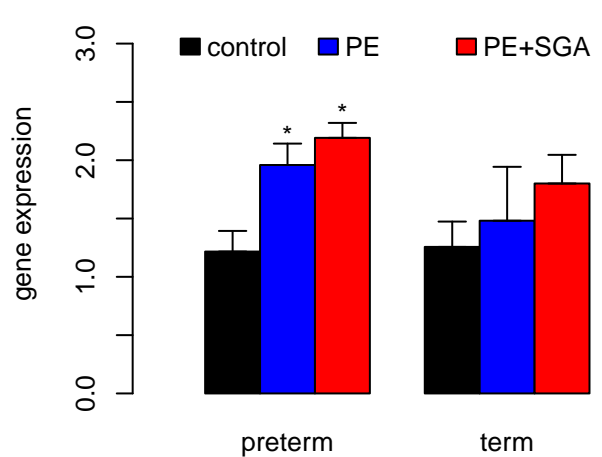

### LEP

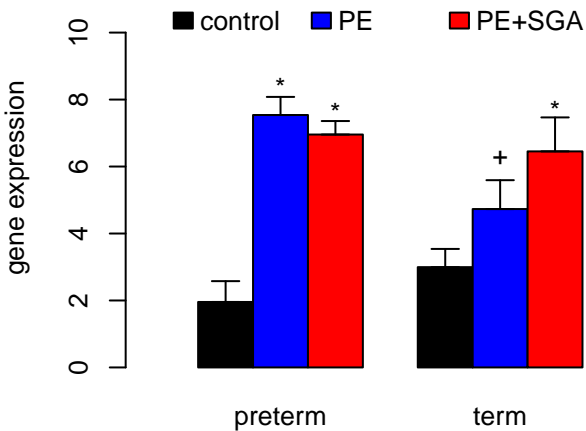

### LGALS13

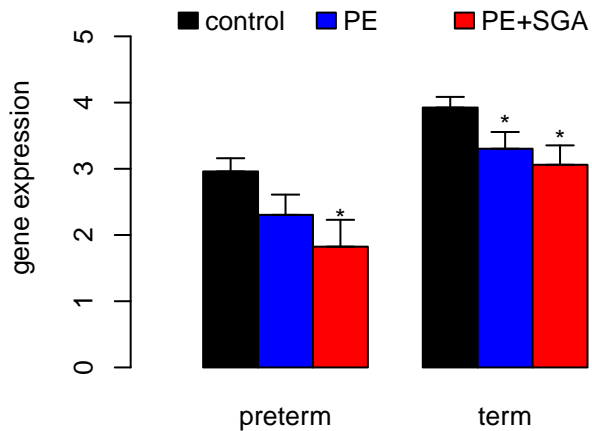

### LGALS14

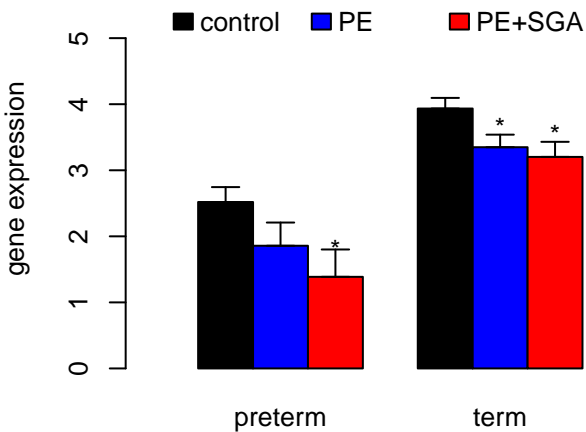

### LGALS16

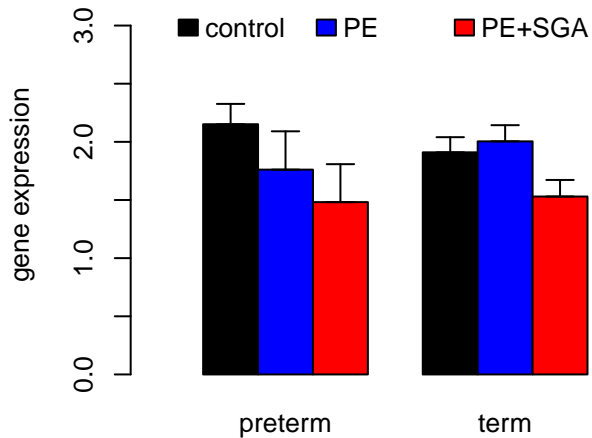



### LGALS17A

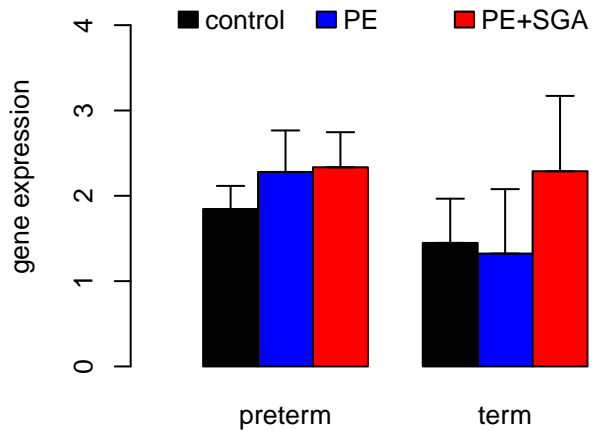

### MAPK13

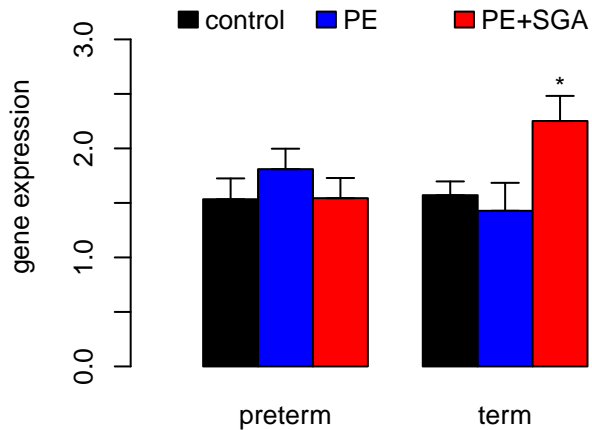

### NANOG

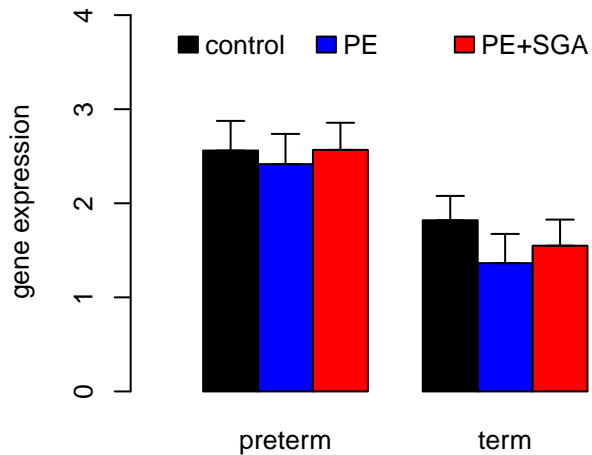

### PAPPA

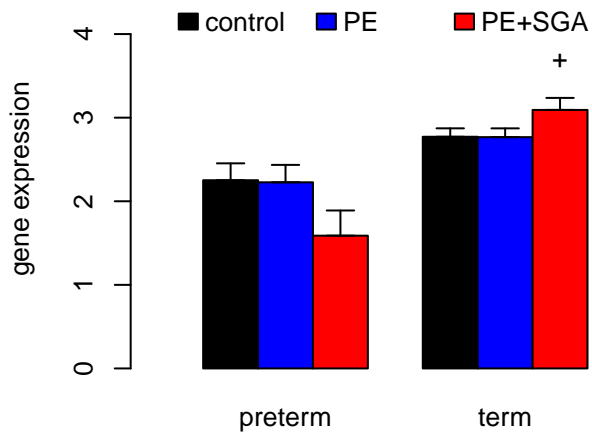

### PAPPA2

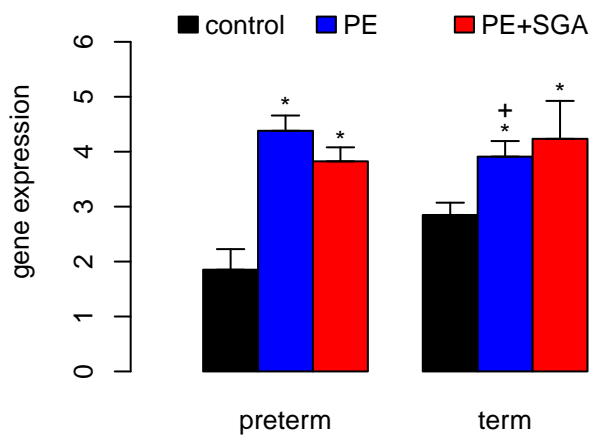

### PGF

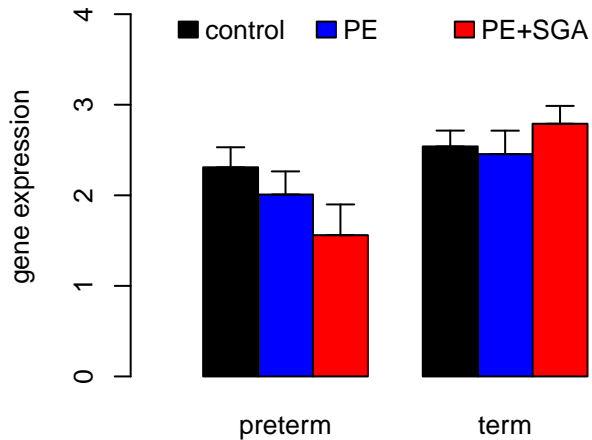

### PLAC1

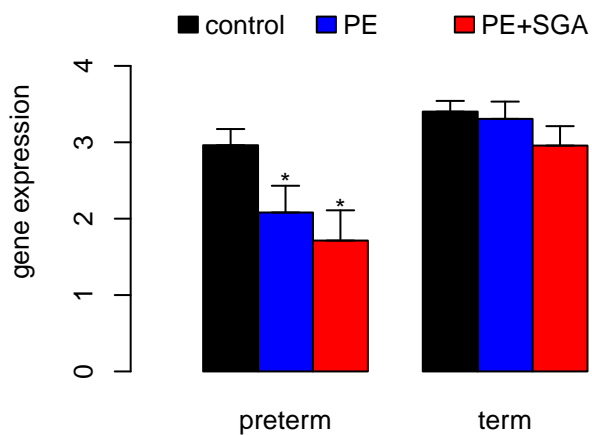

### POU5F1

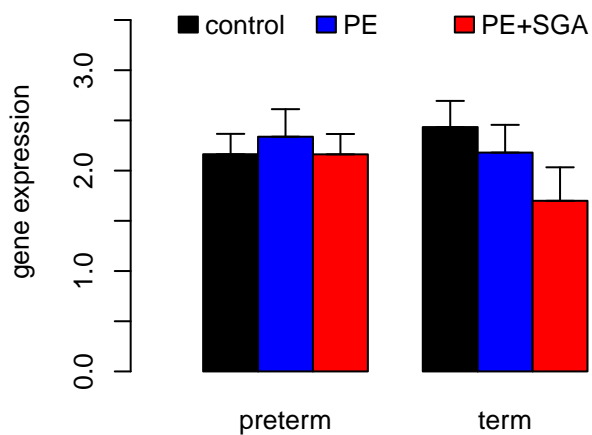

### SIGLEC6

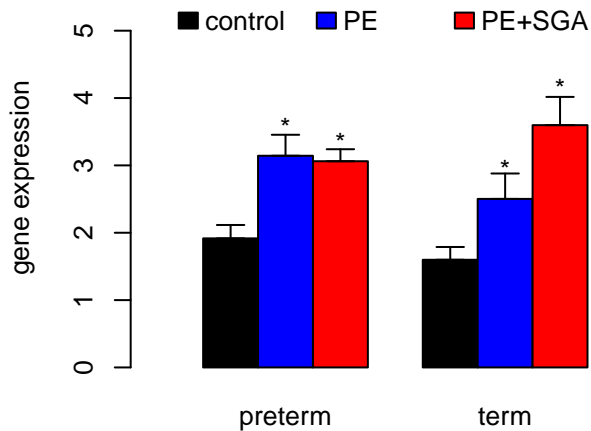

### TEAD3

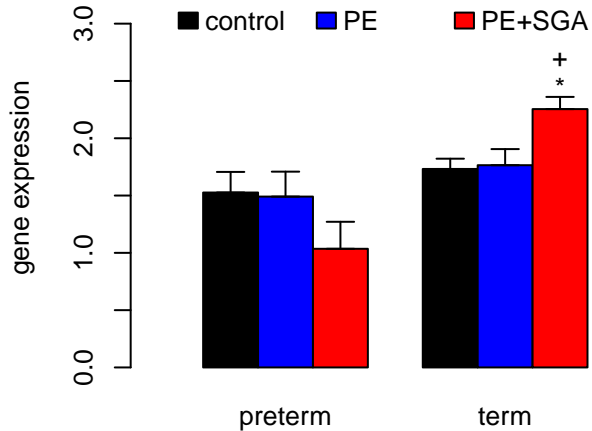

### TFAM

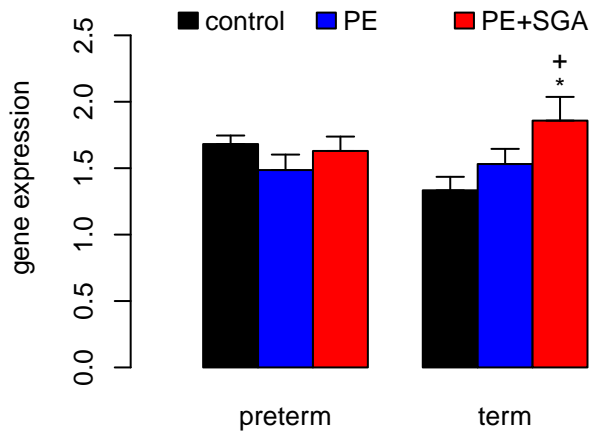

### TFAP2A

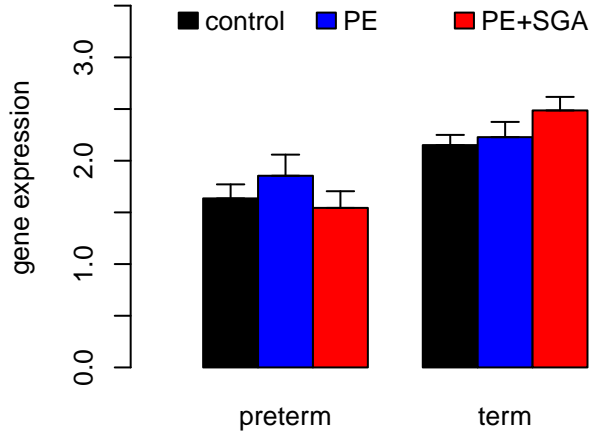

### TPBG

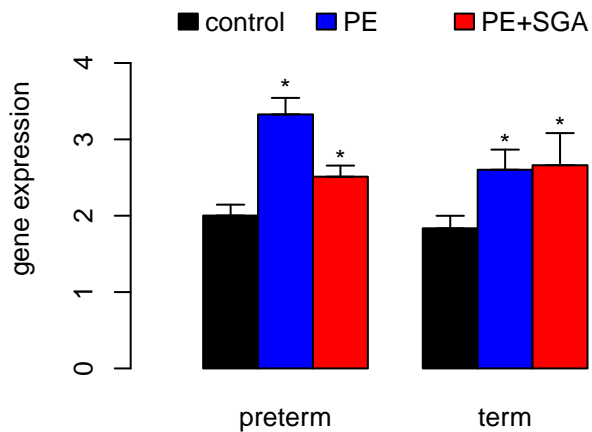

### VDR

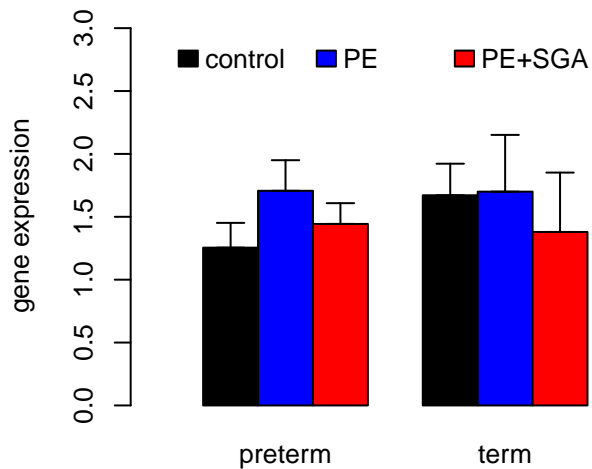

### ZNF554

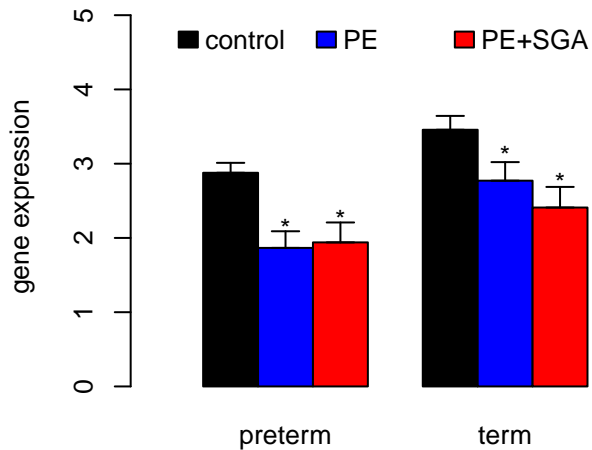

Supplement: Image_3.pdf [file Image_3.pdf]
