# Supplementary material for: Integrated Systems Biology Approach Identifies Novel Maternal and Placental Pathways of Preeclampsia
Source: PubMed Central journal article supplement (PMC6092567; doi:10.3389/fimmu.2018.01661), 2018-08-08

*BCL6* Chr3 187,456,131

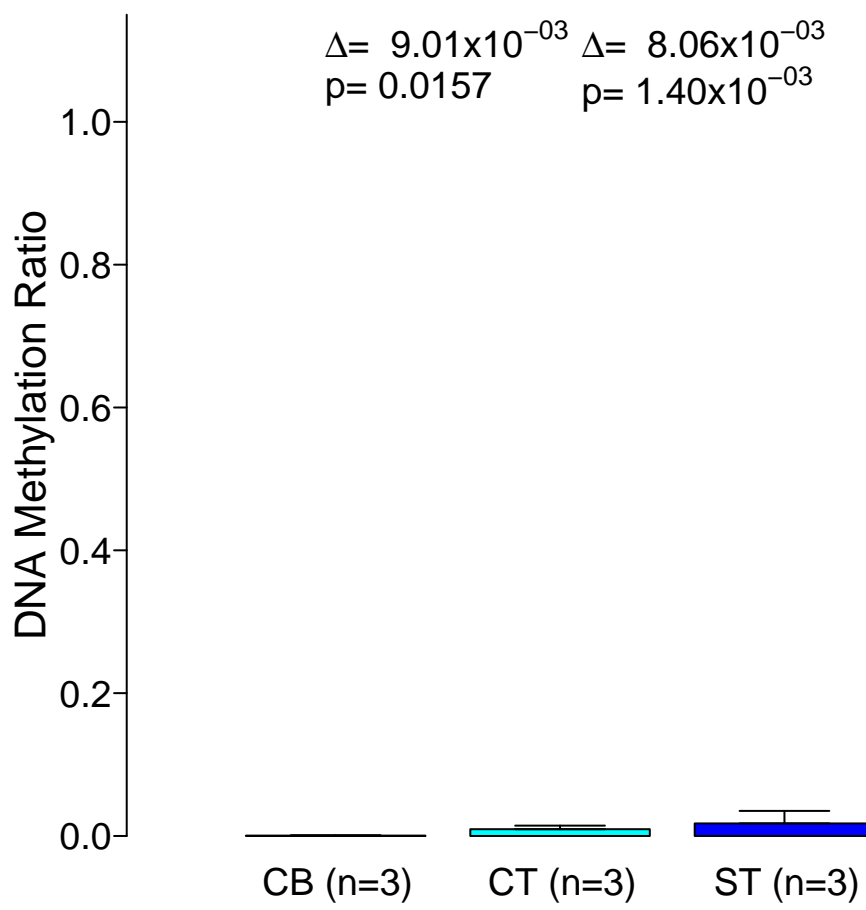

*BCL6* Chr3 187,456,175

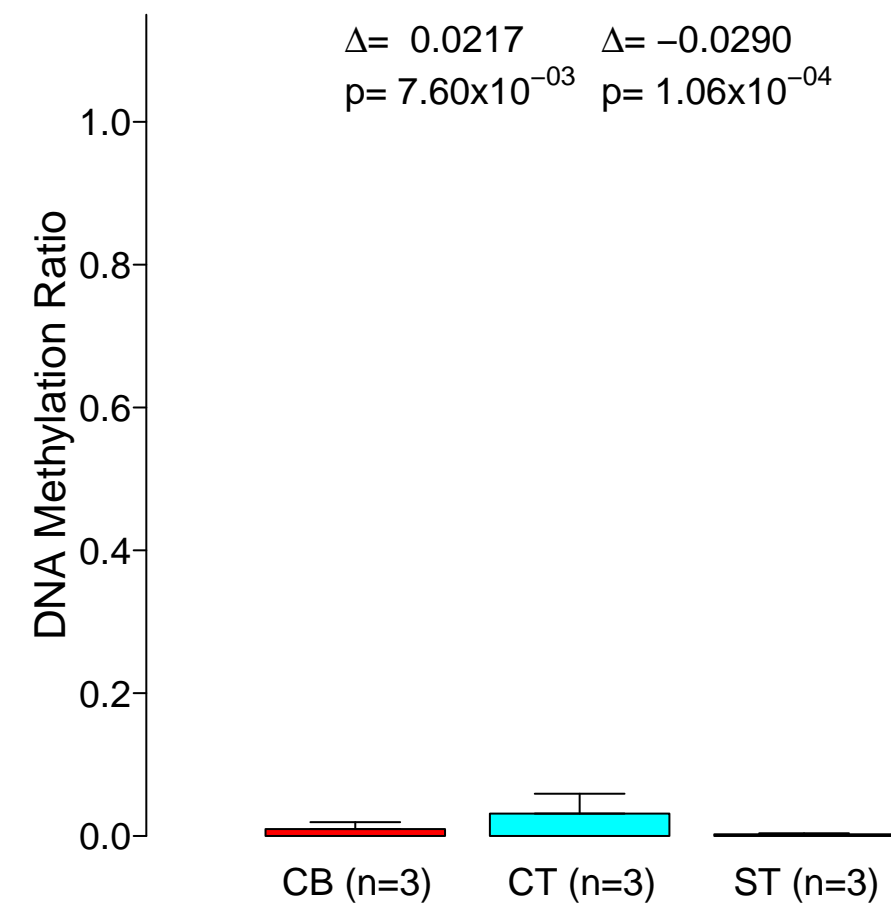

*BCL6* Chr3 187,456,181

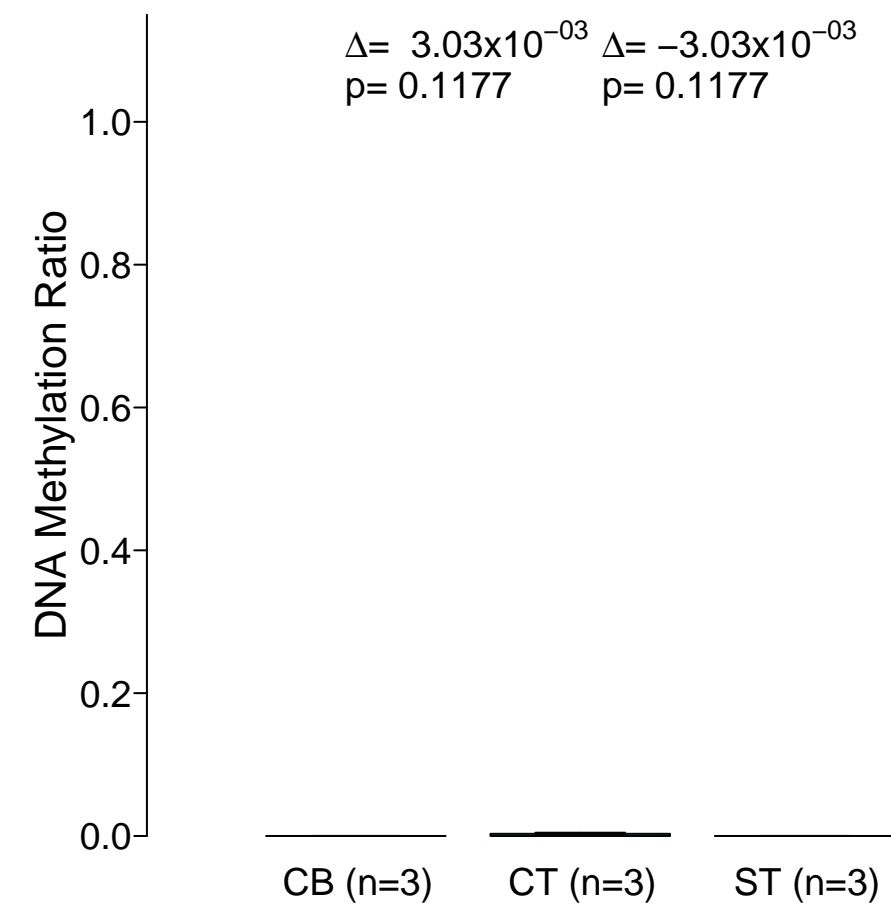

*BCL6* Chr3 187,456,193

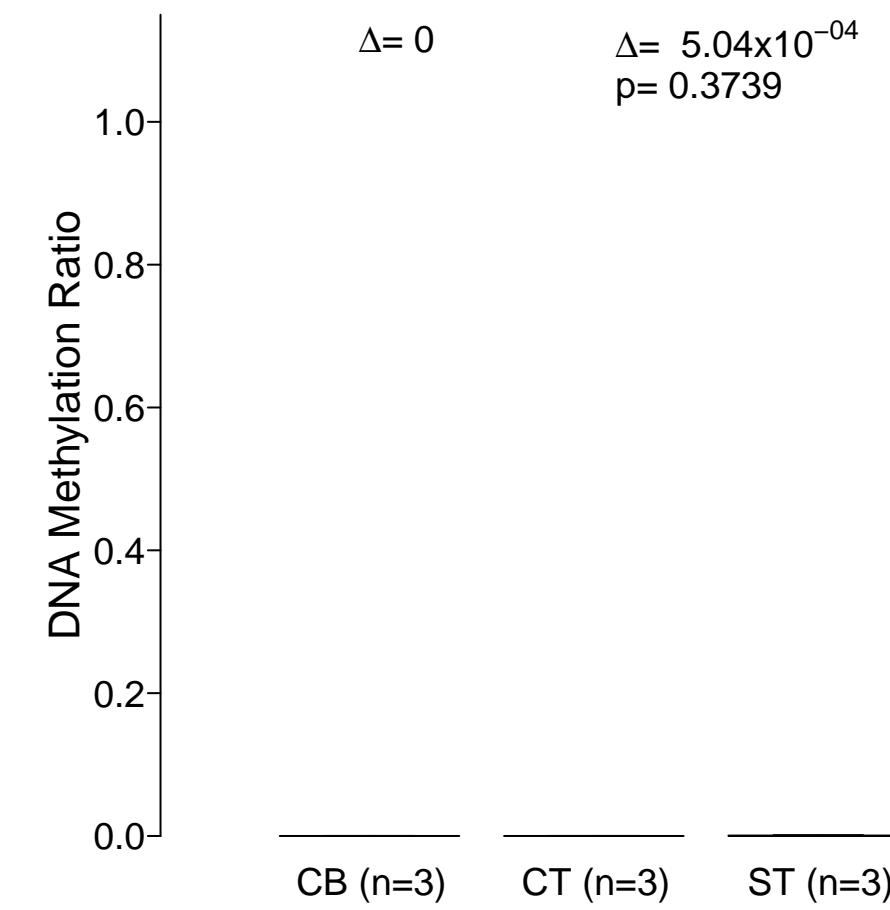

*BCL6* Chr3 187,456,218

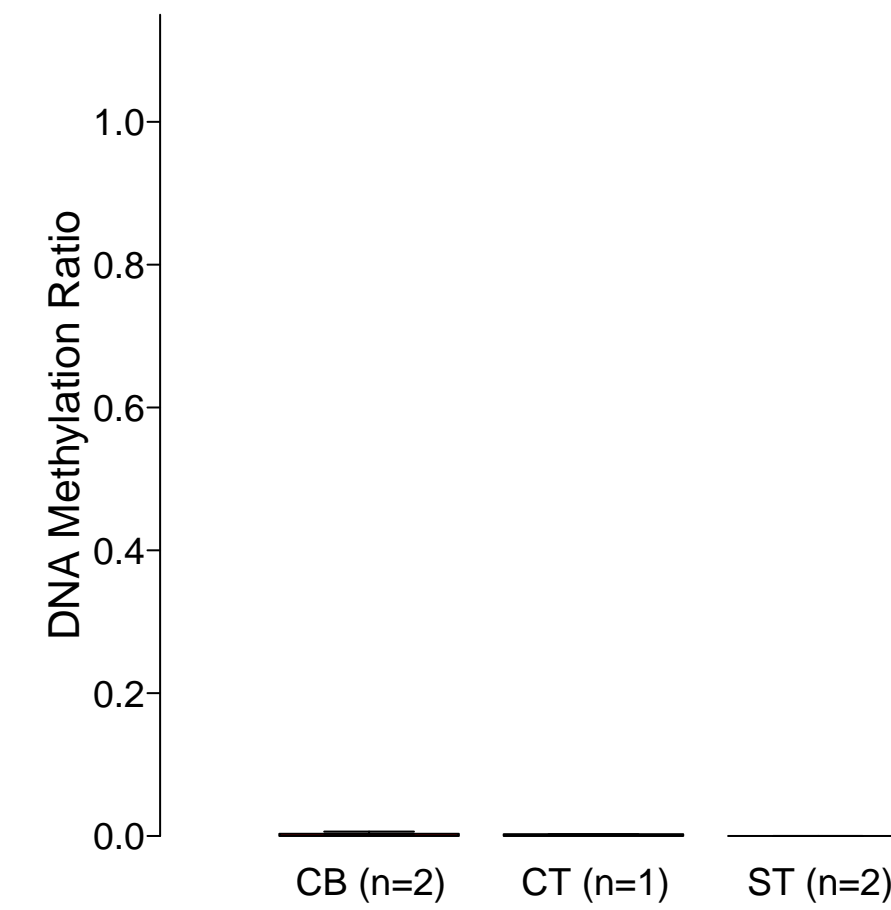

*BCL6* Chr3 187,456,251

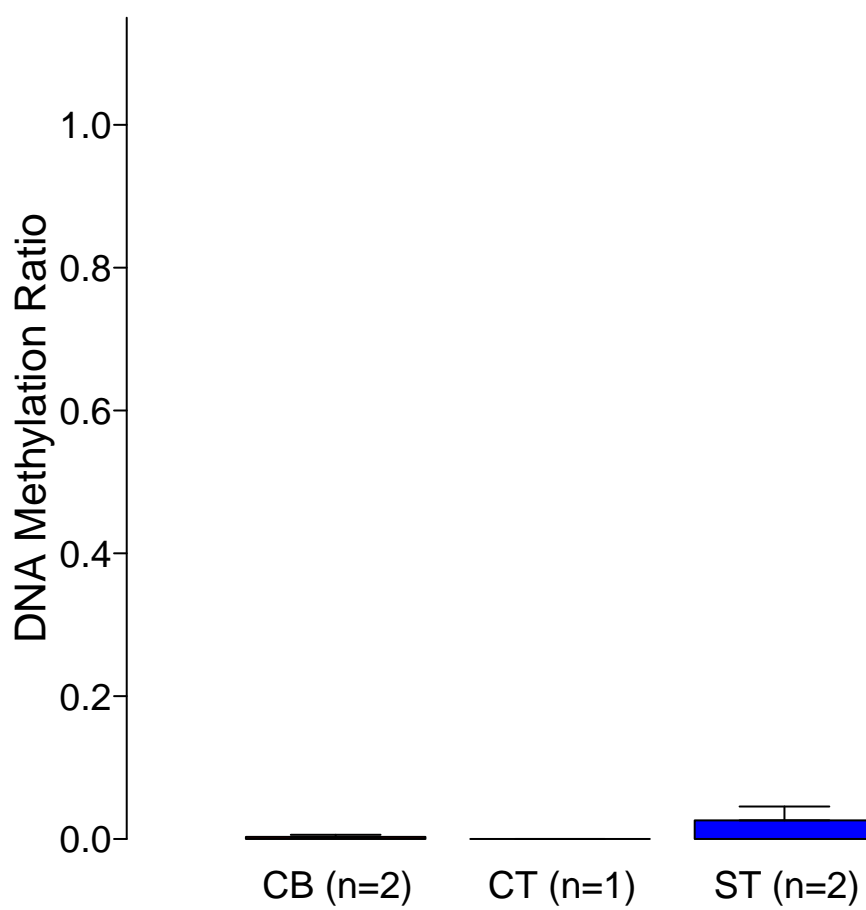

*BCL6* Chr3 187,456,263

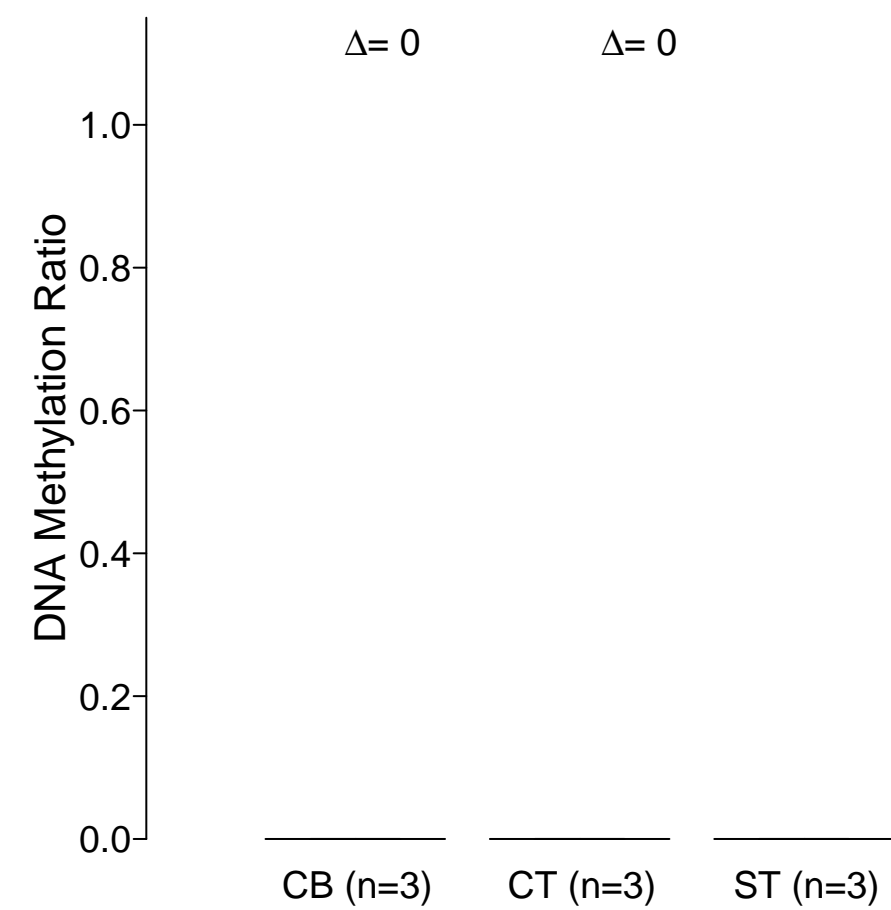

*BCL6* Chr3 187,456,269

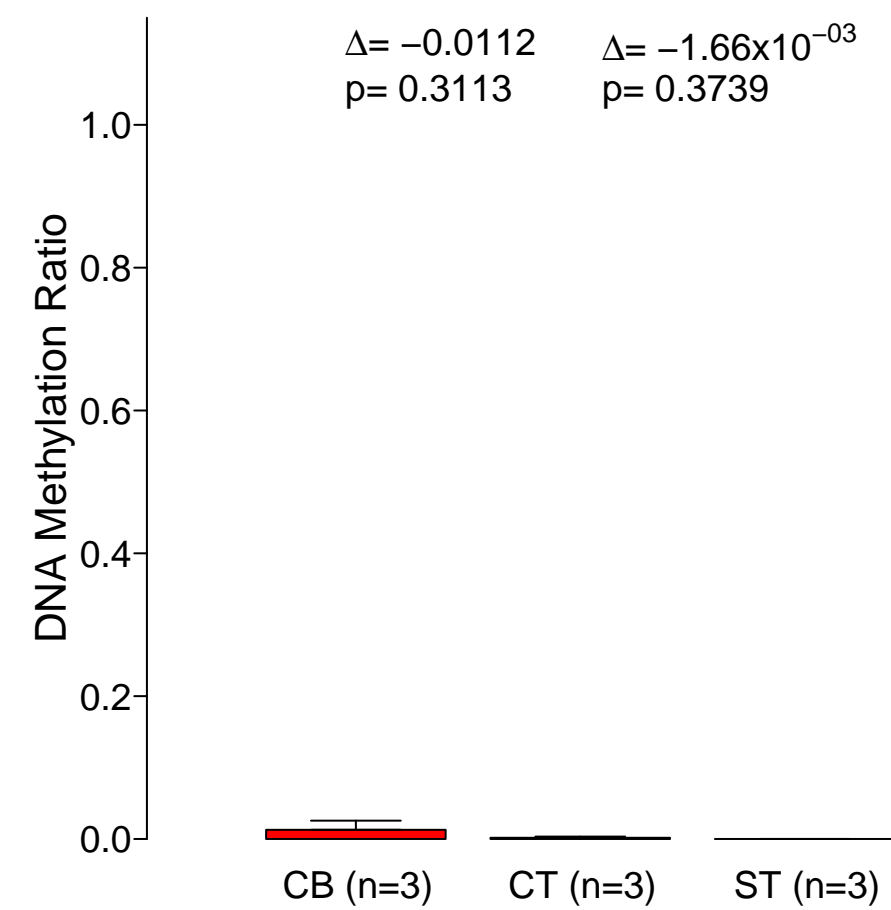

*BCL6* Chr3 187,456,278

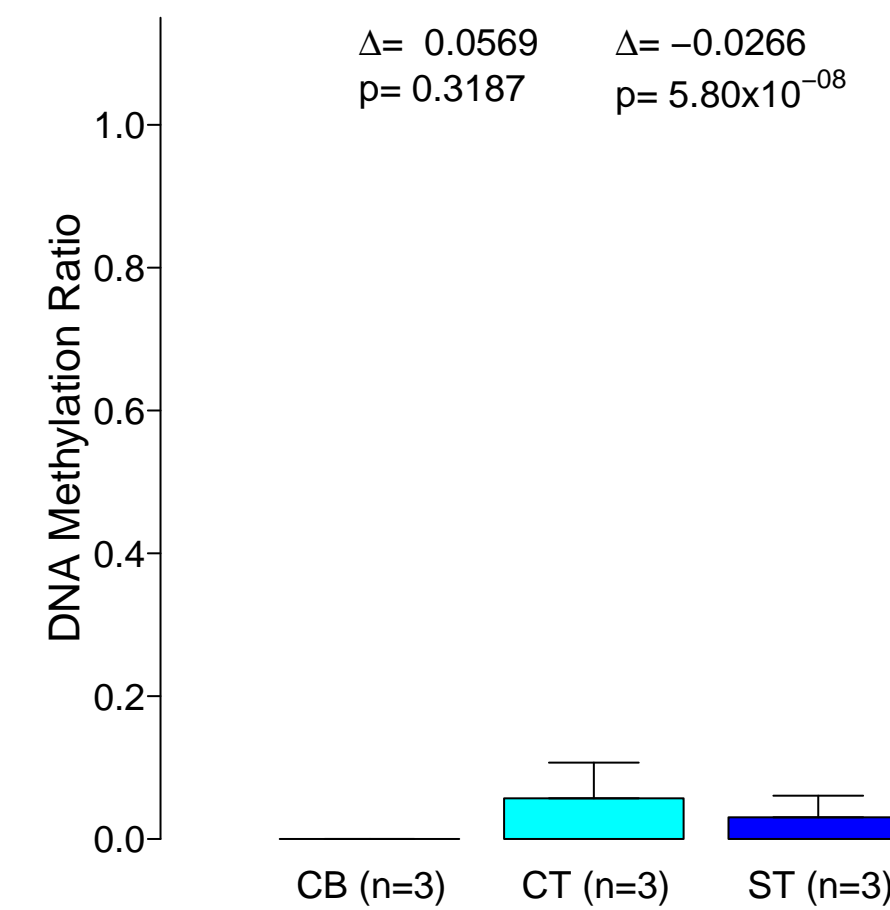

*BCL6* Chr3 187,456,284

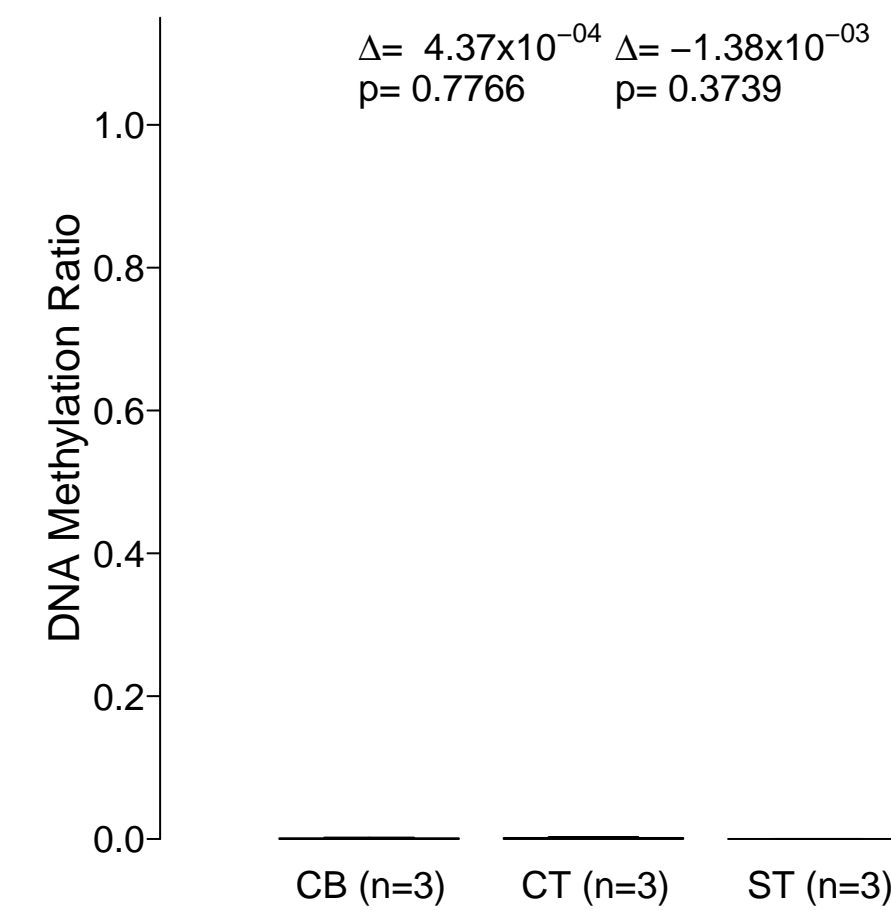

*BCL6* Chr3 187,456,305

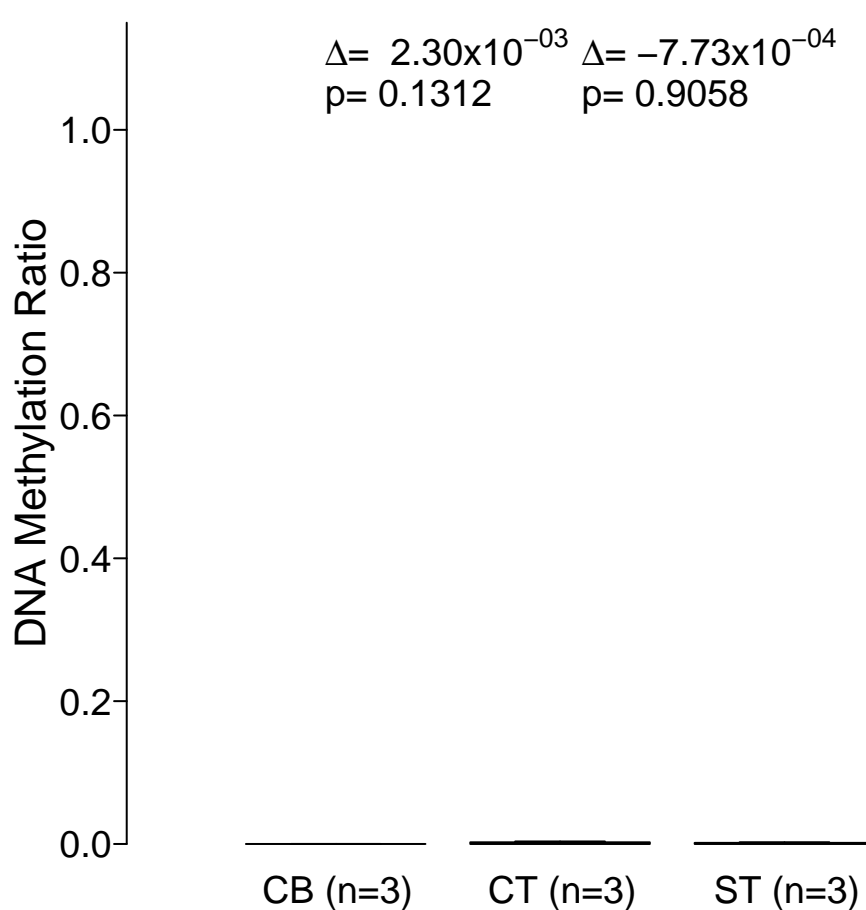

*BCL6* Chr3 187,456,315

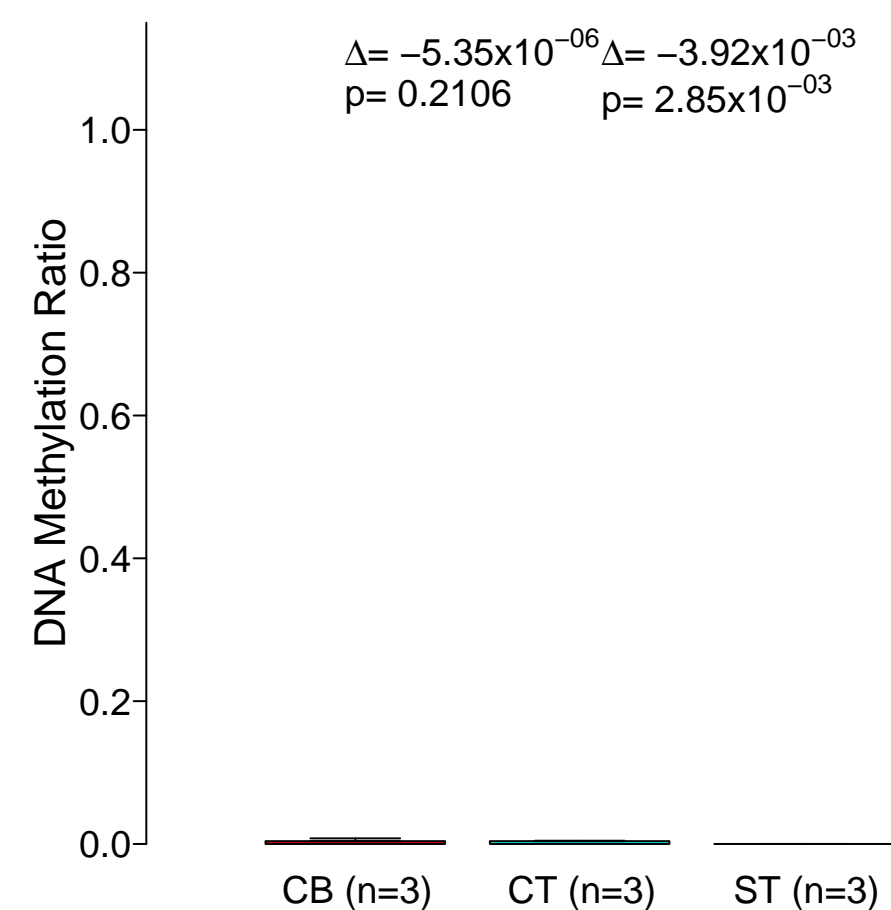

*BCL6* Chr3 187,456,323

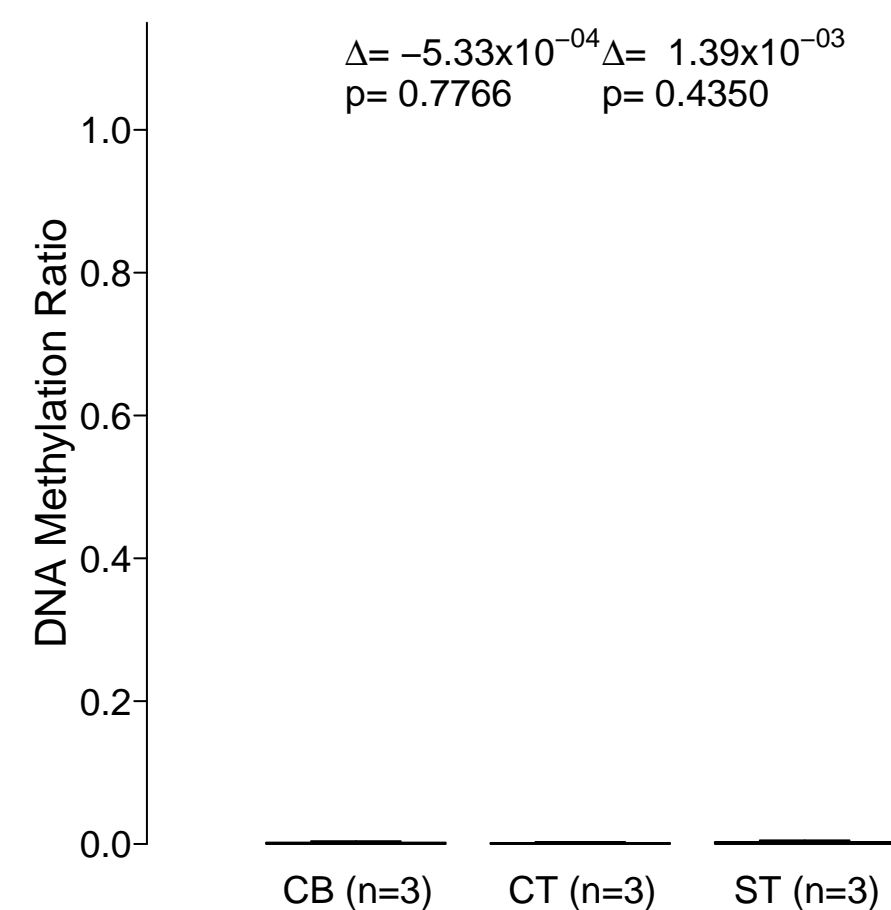

*BCL6* Chr3 187,456,332

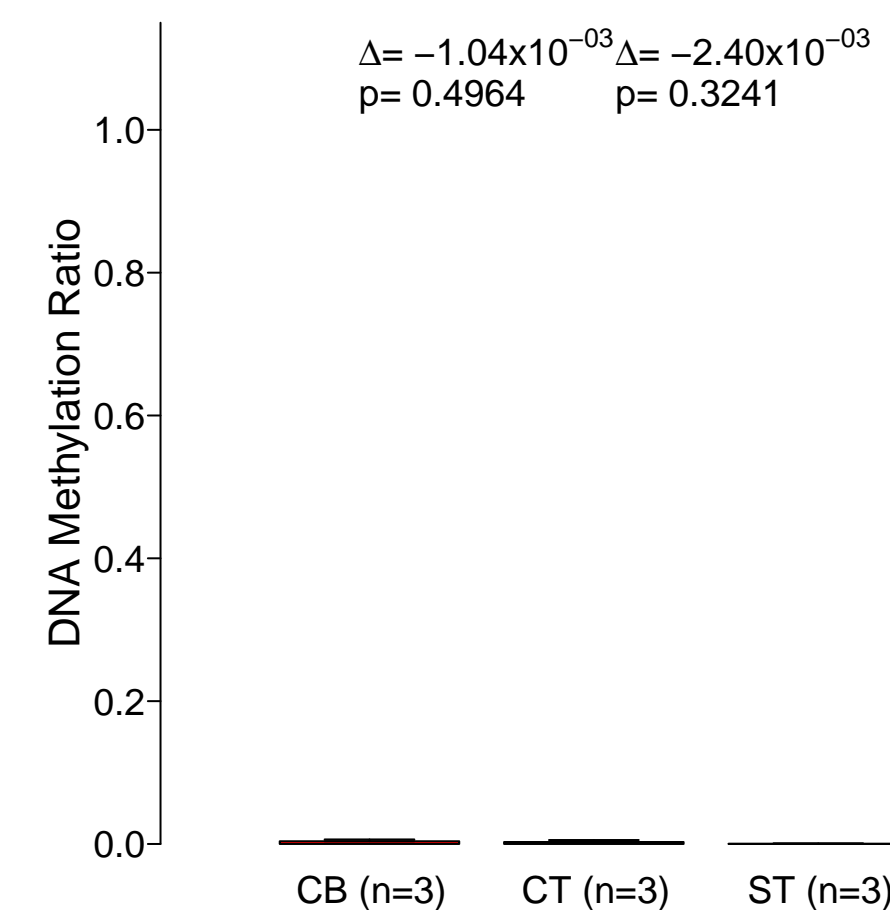

*BCL6* Chr3 187,456,334

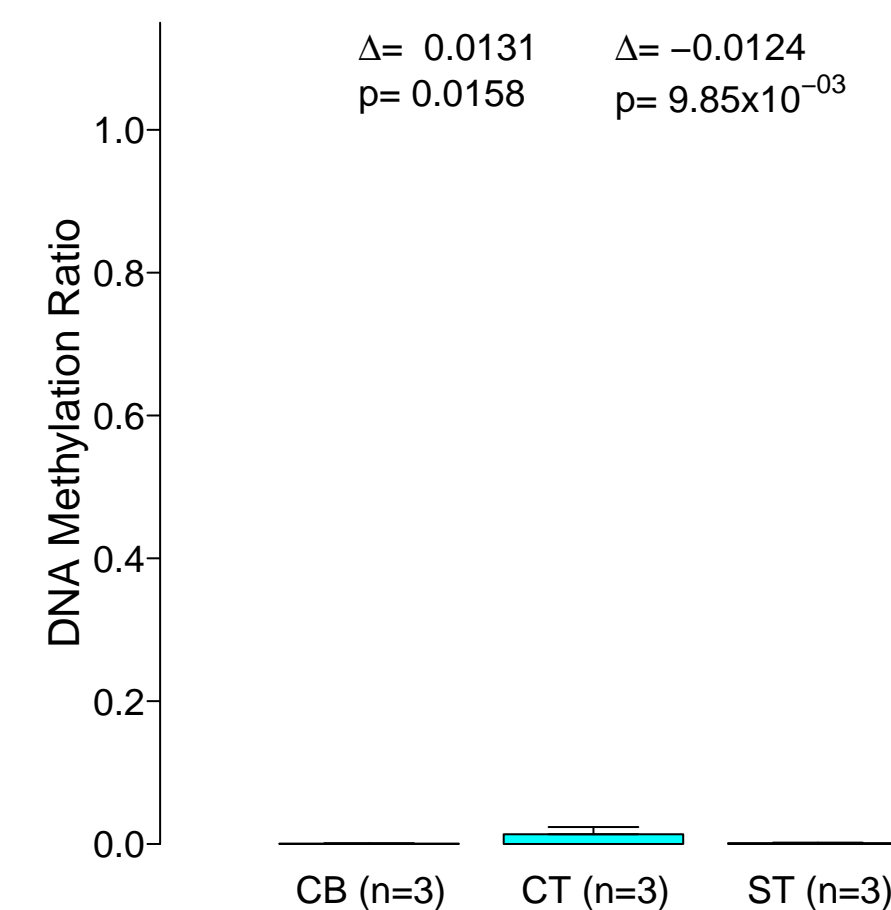

*BCL6* Chr3 187,456,336

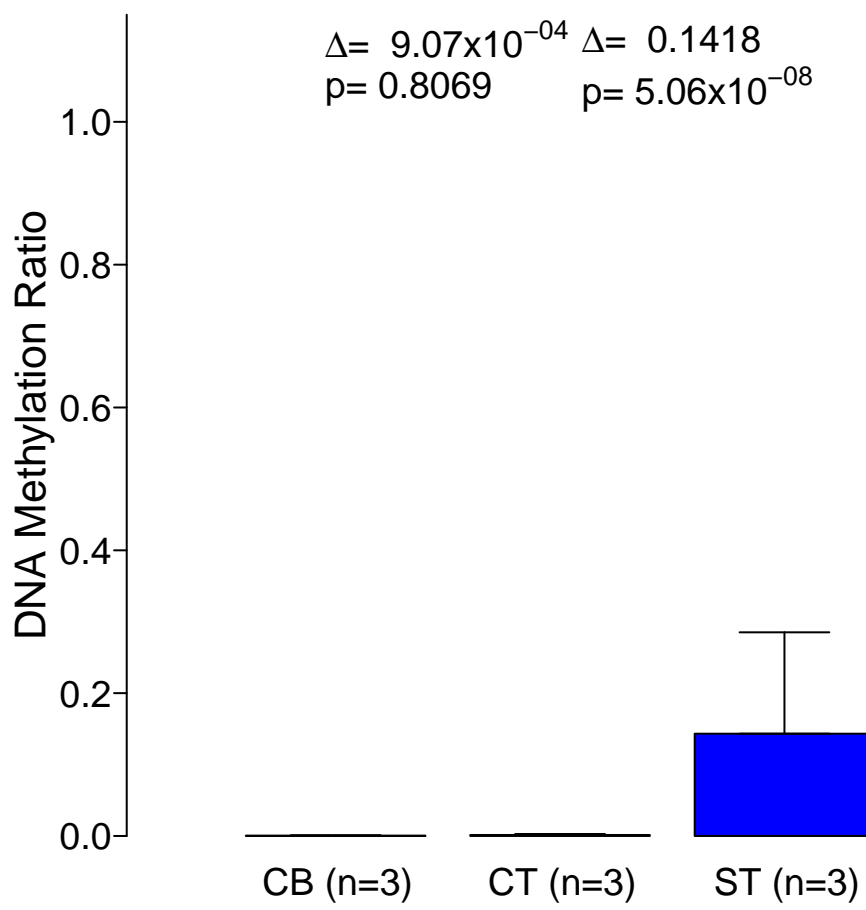

*BCL6* Chr3 187,456,362

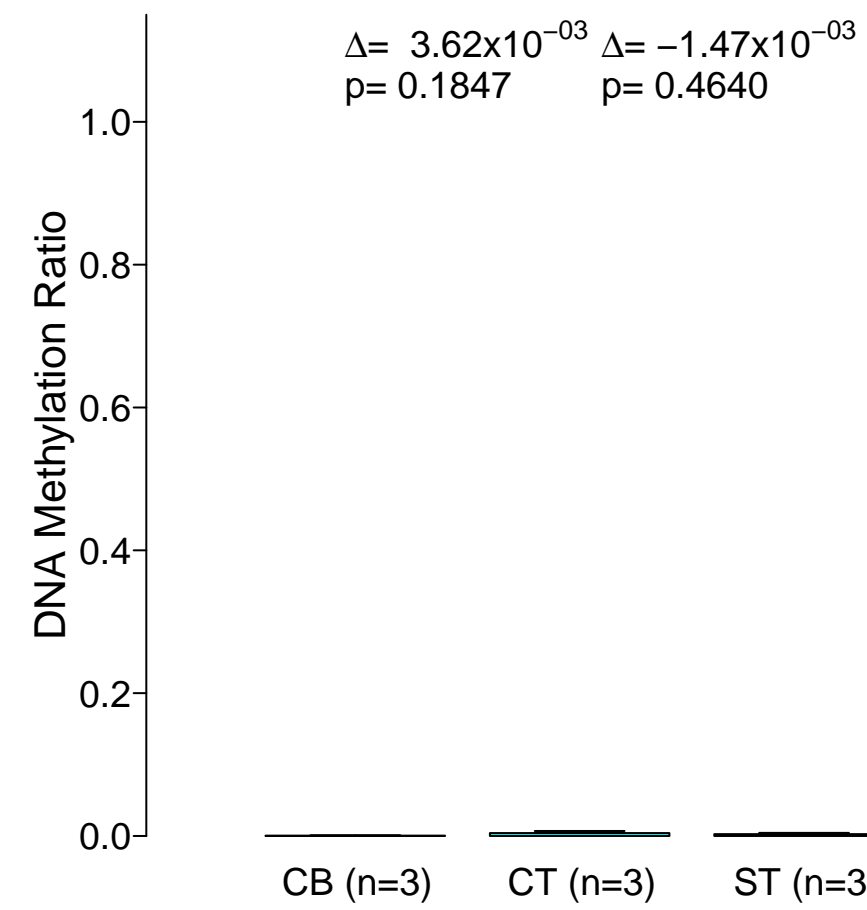

*BCL6* Chr3 187,456,381

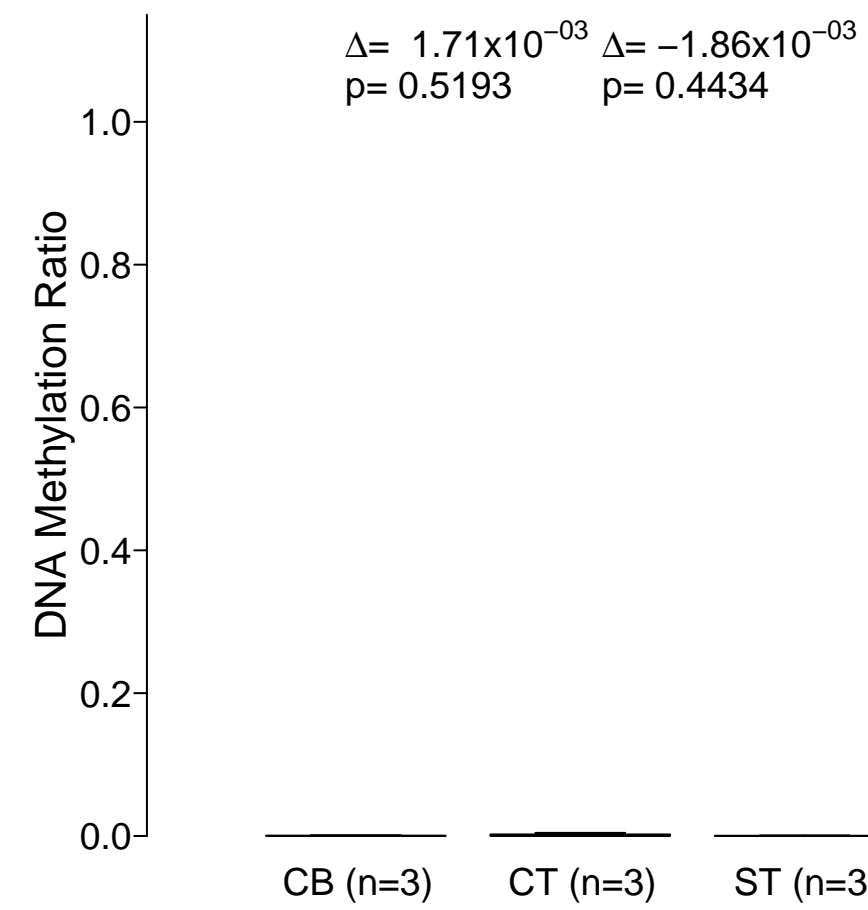

*BCL6* Chr3 187,456,397

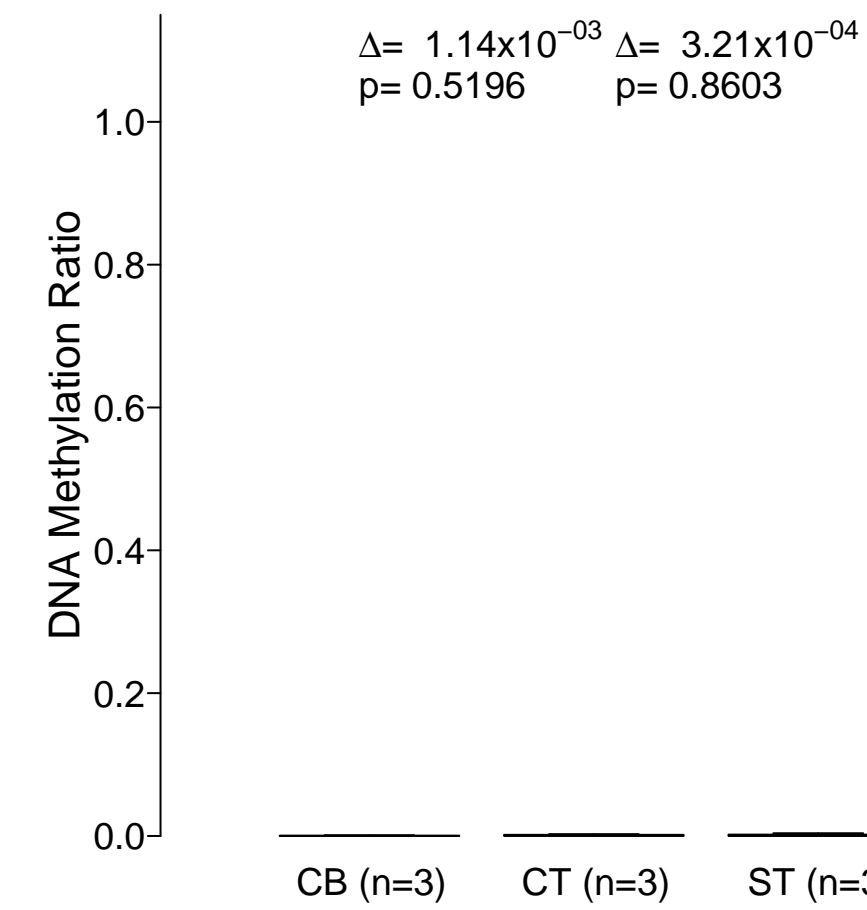

*BCL6* Chr3 187,456,421

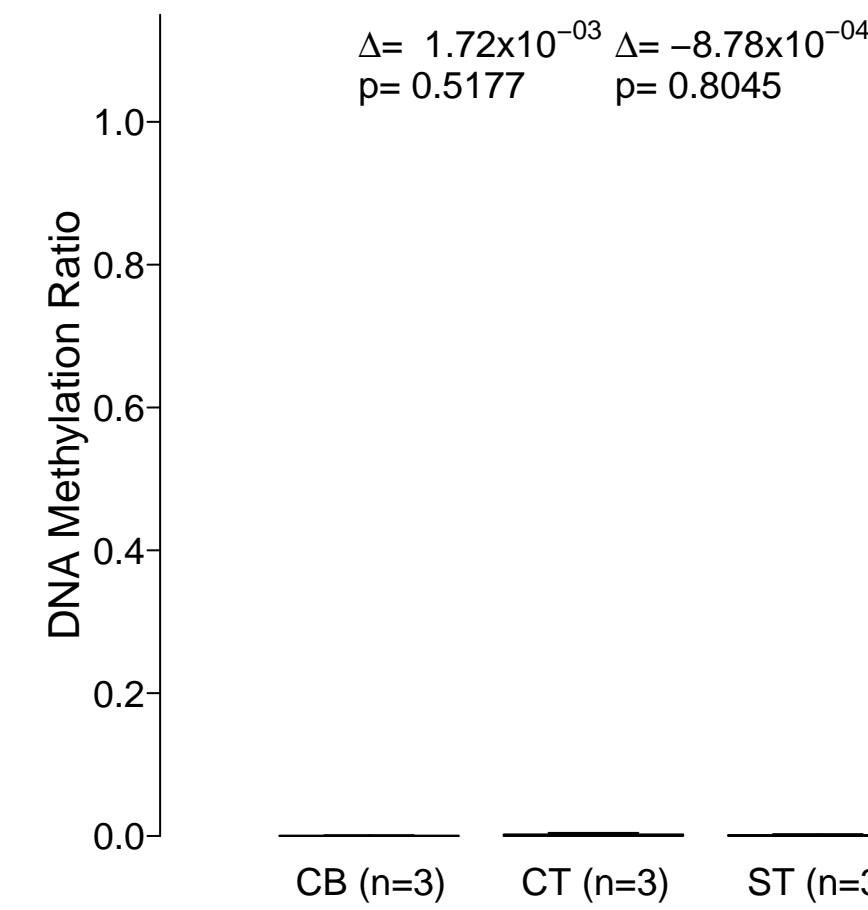

*BCL6* Chr3 187,456,434

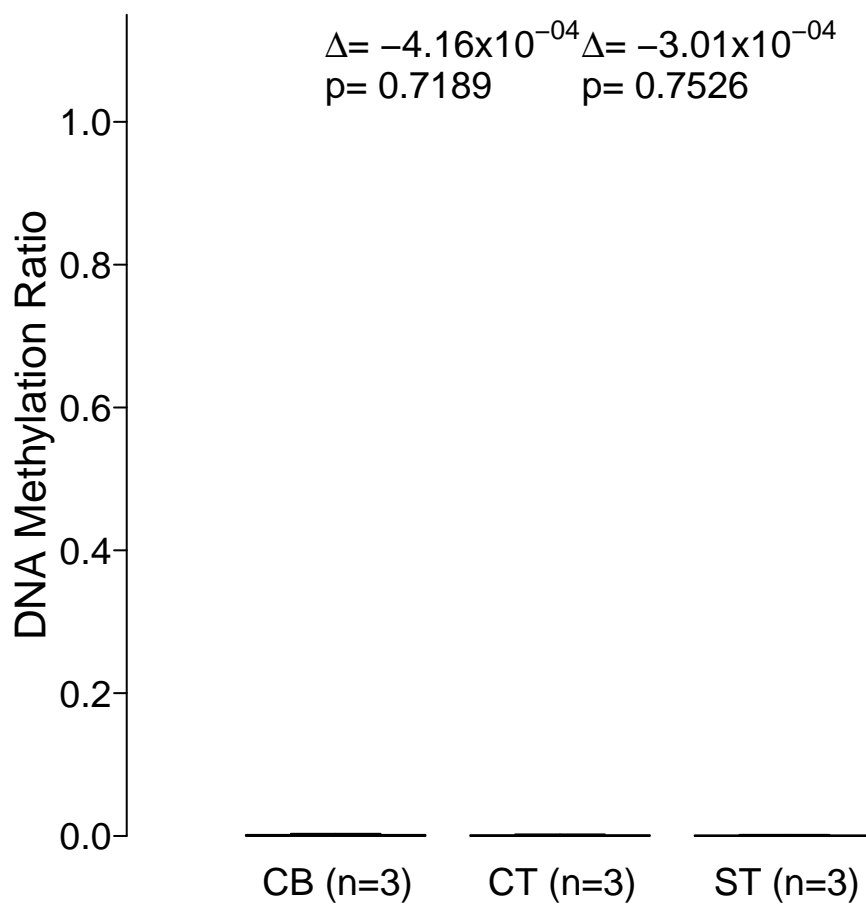

*BCL6* Chr3 187,456,441

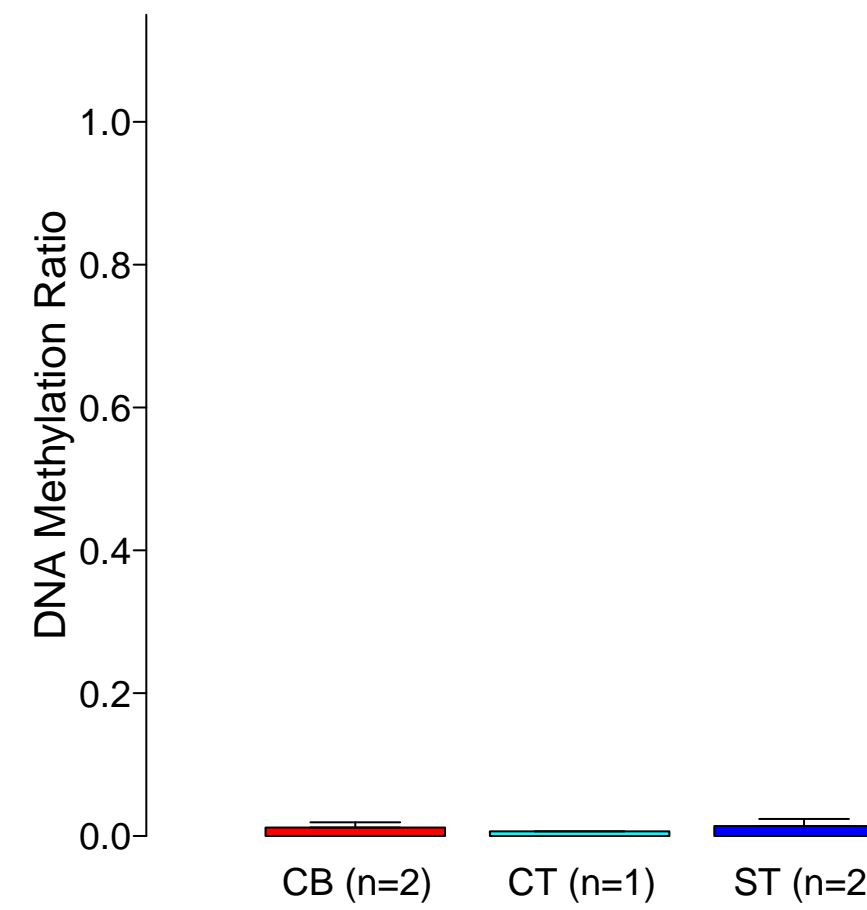

*BCL6* Chr3 187,456,447

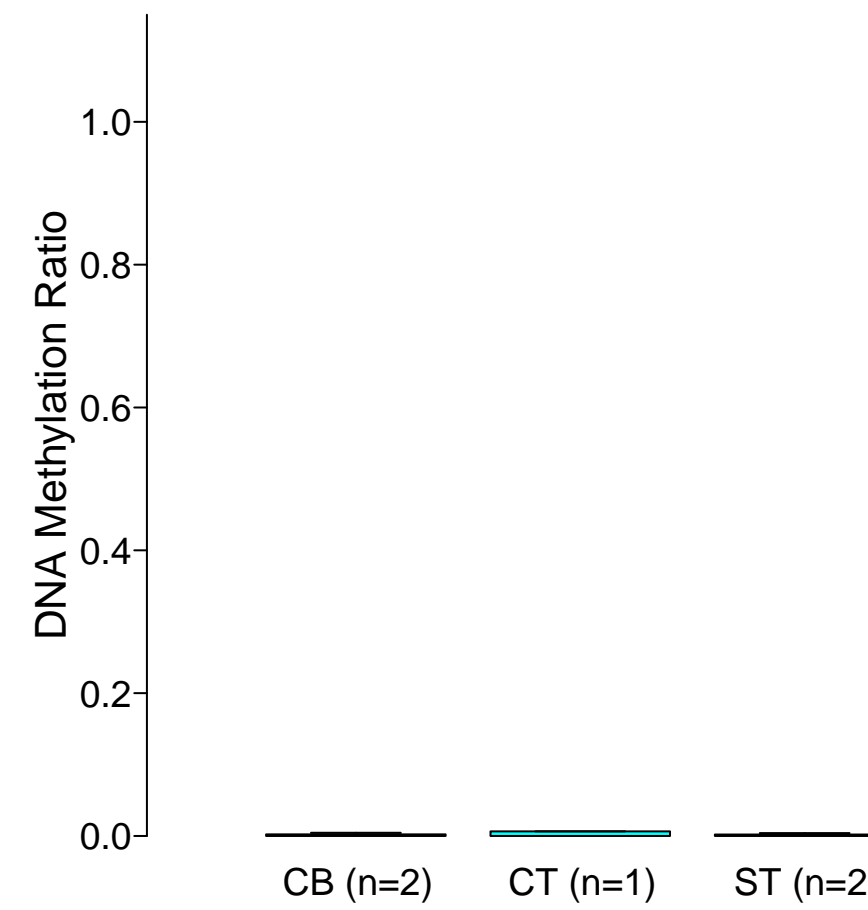

*BCL6* Chr3 187,456,464

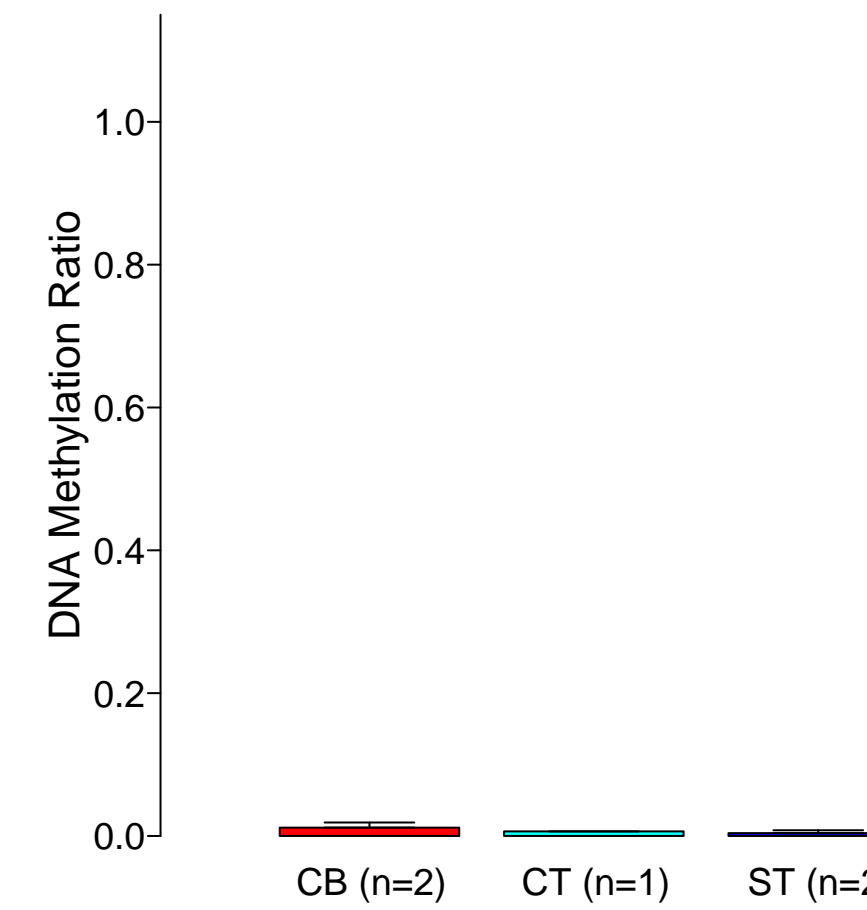

*BCL6* Chr3 187,456,486

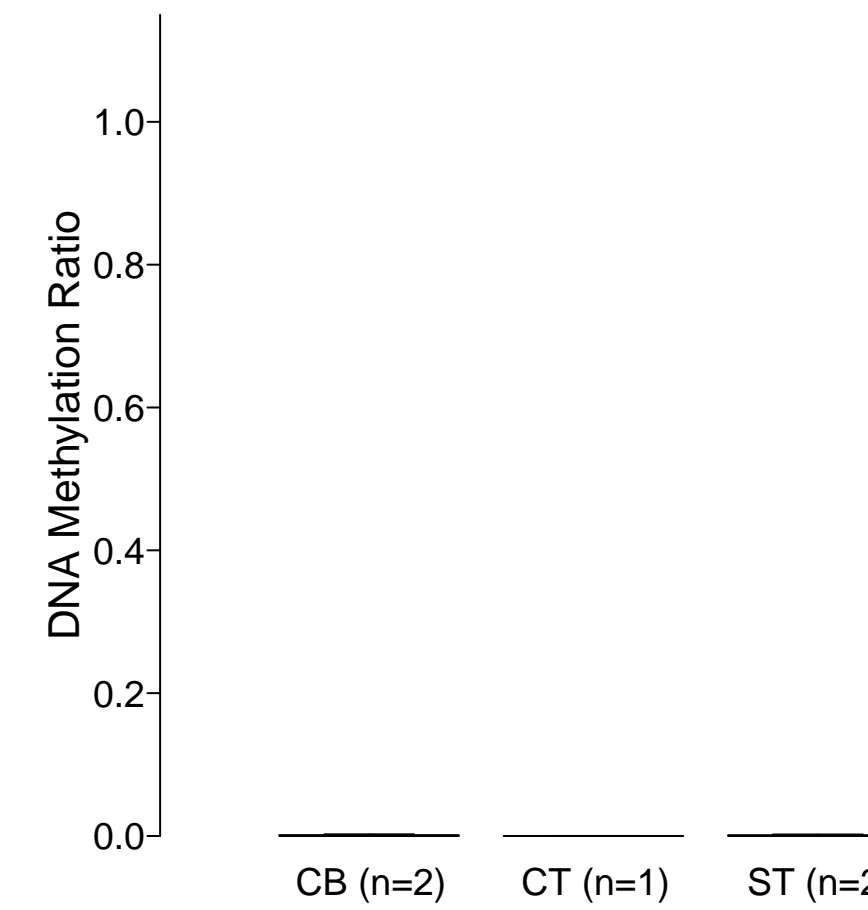

*BCL6* Chr3 187,456,515

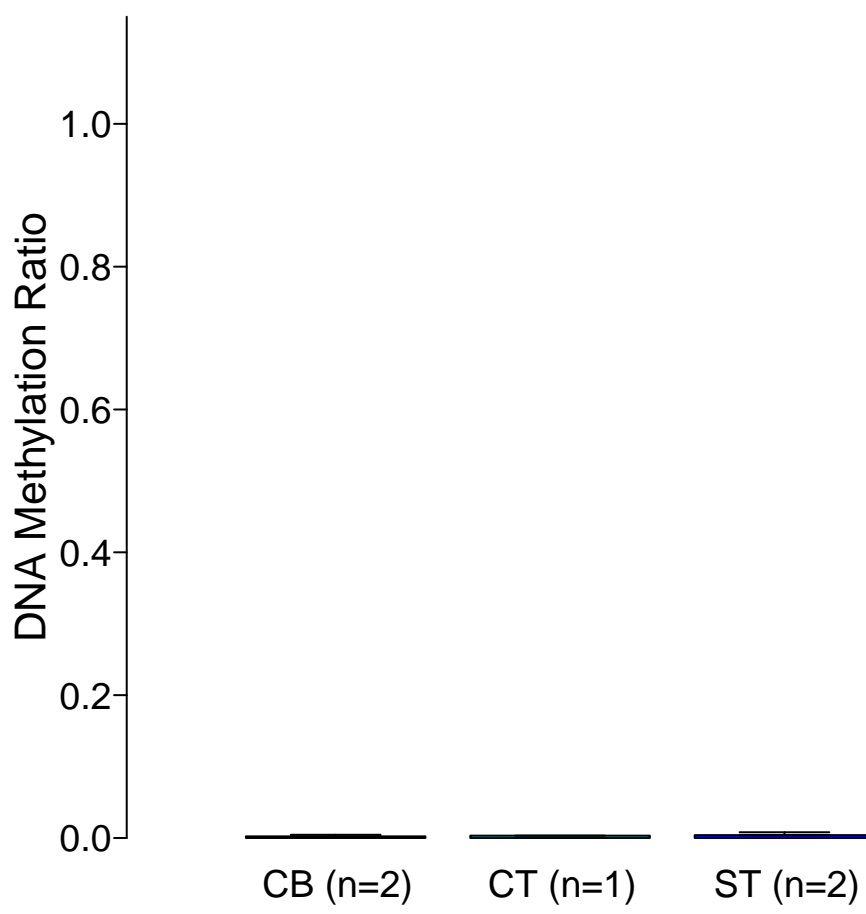

*BCL6* Chr3 187,456,525

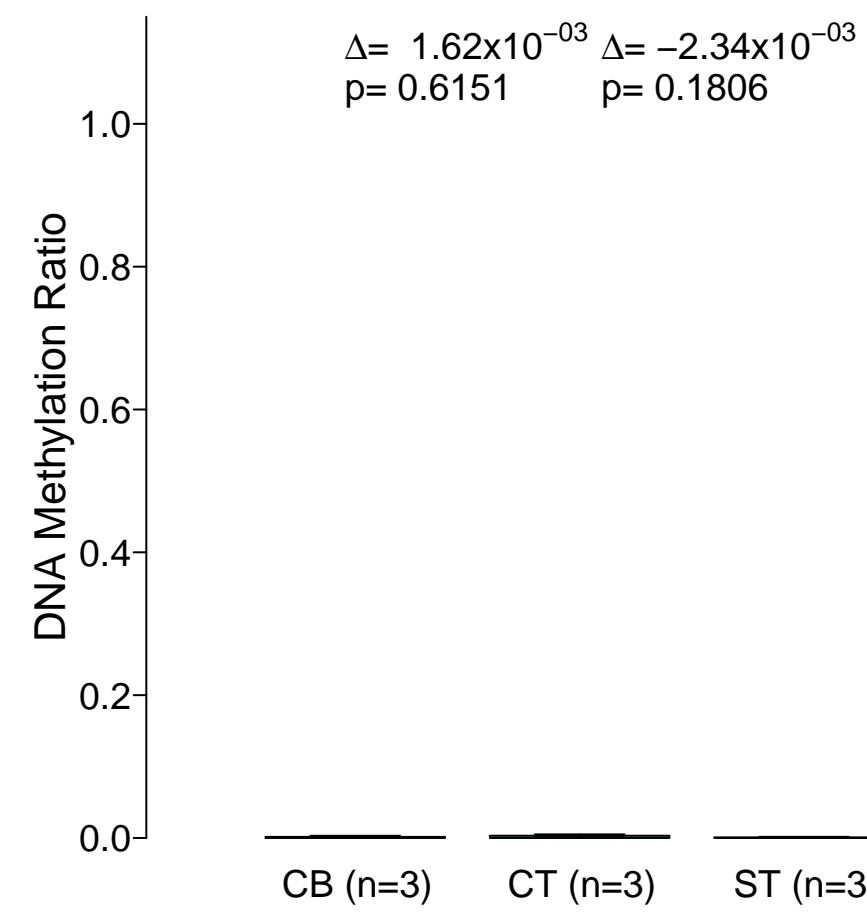

*BCL6* Chr3 187,456,528

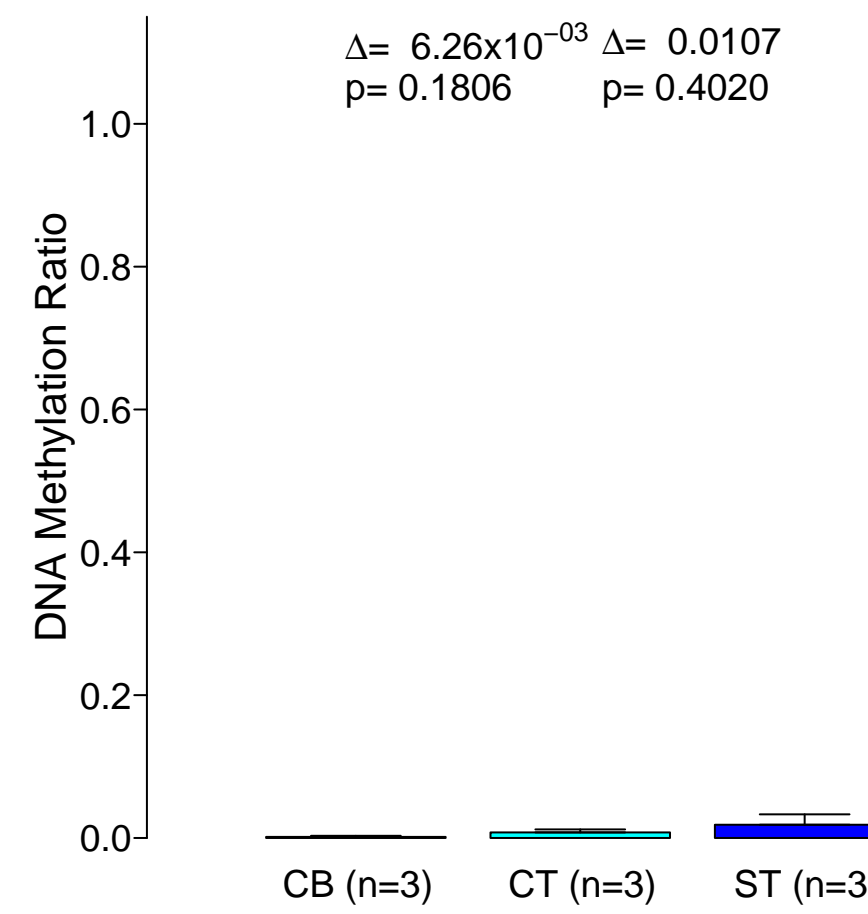

*BCL6* Chr3 187,456,543

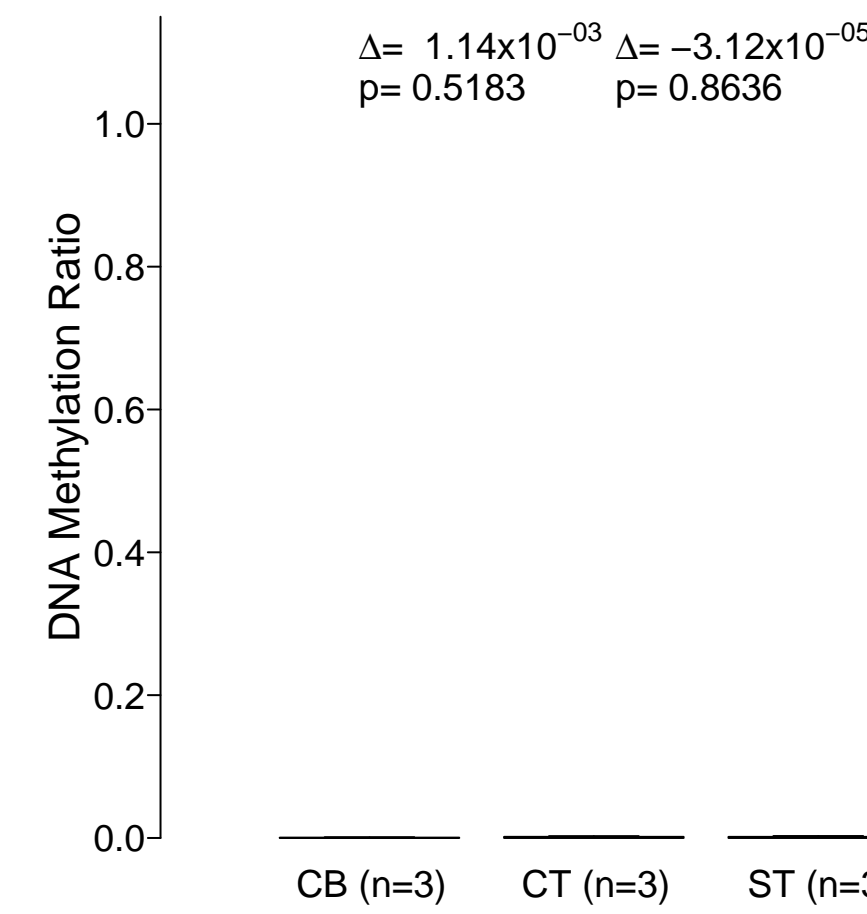

*BCL6* Chr3 187,456,550

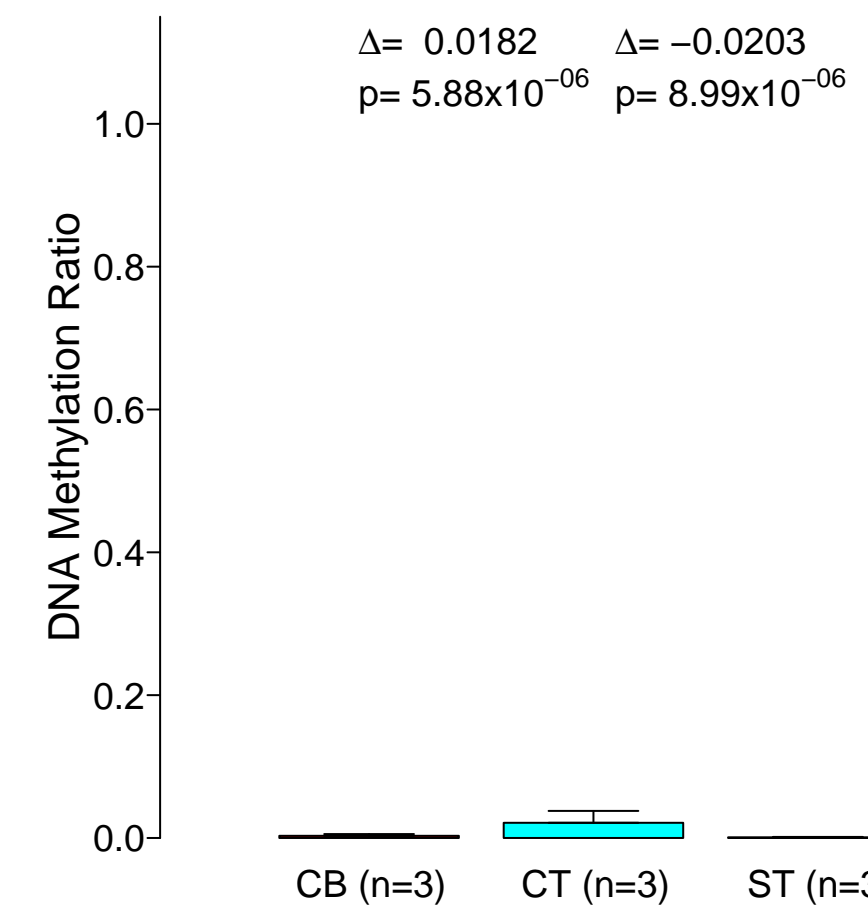

*BCL6* Chr3 187,456,565

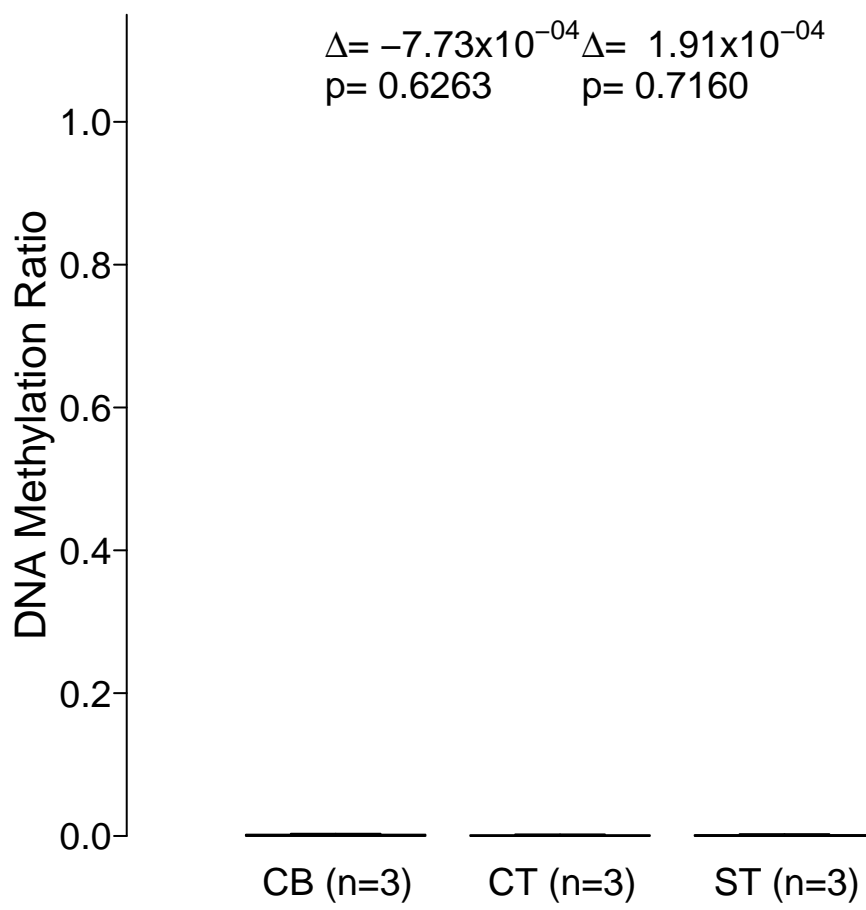

*BCL6* Chr3 187,456,579

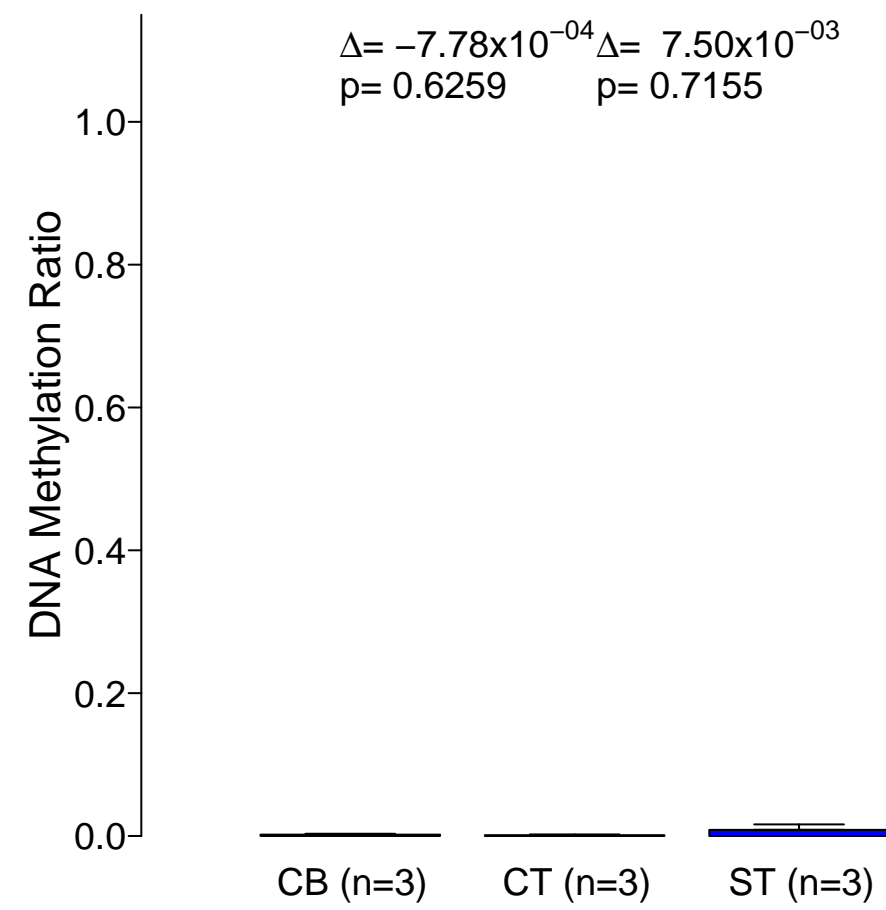

*BCL6* Chr3 187,456,625

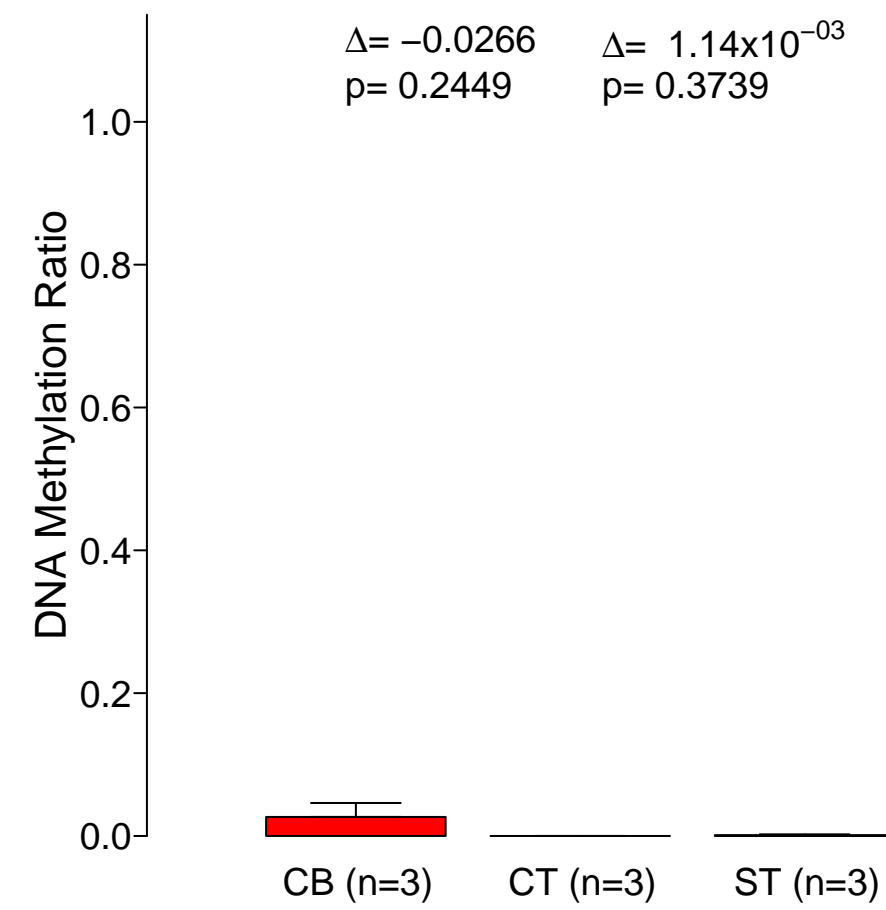

*BCL6* Chr3 187,456,629

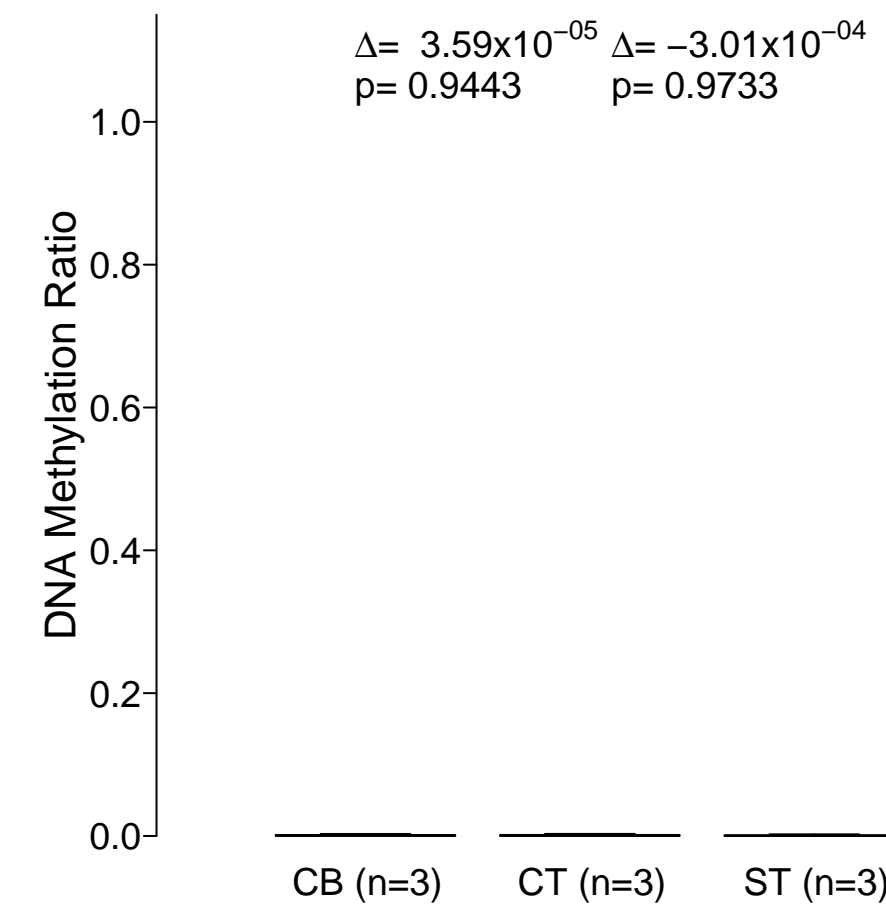

*BCL6* Chr3 187,456,652

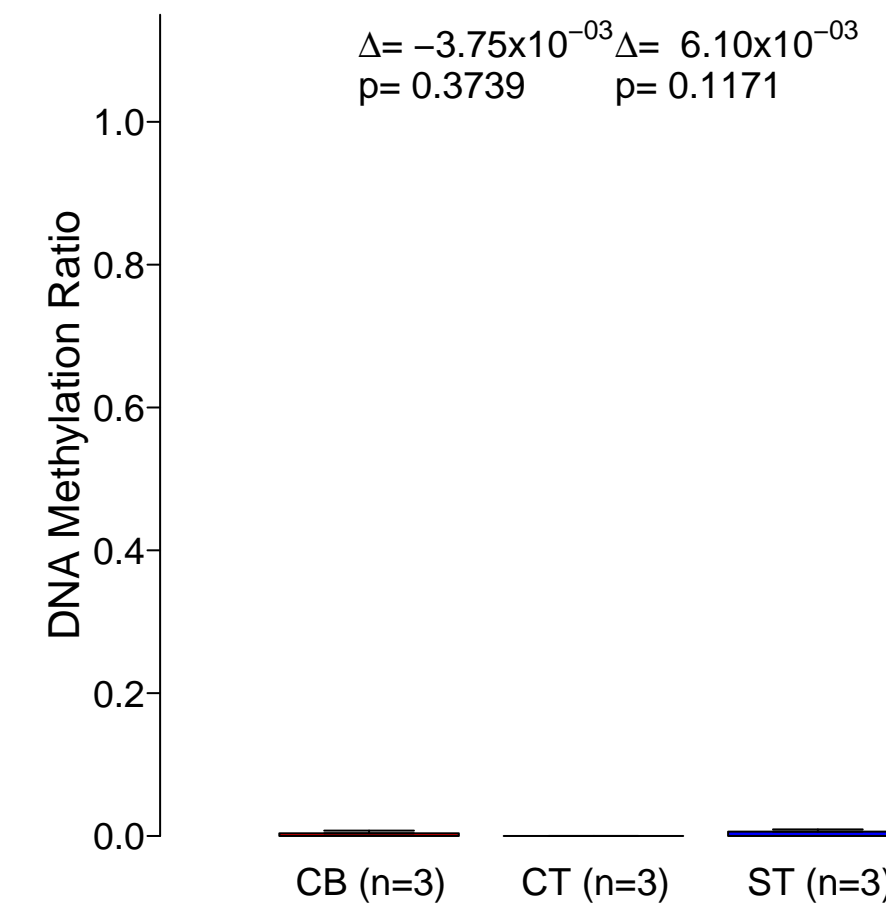

*BCL6* Chr3 187,456,734

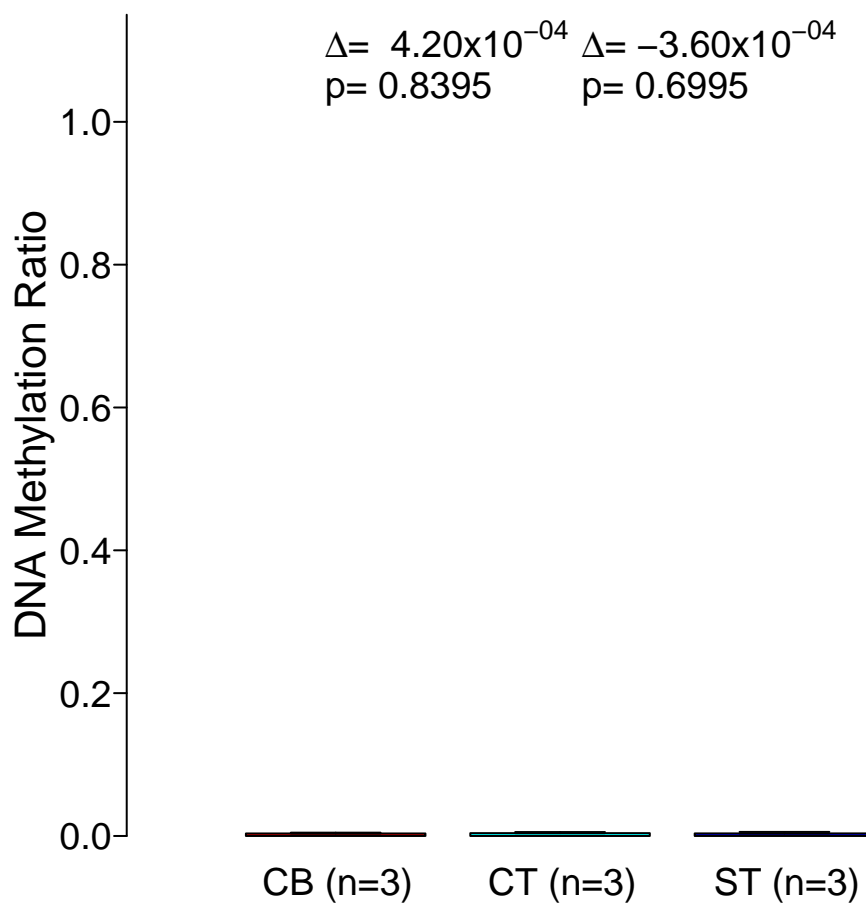

*BCL6* Chr3 187,456,742

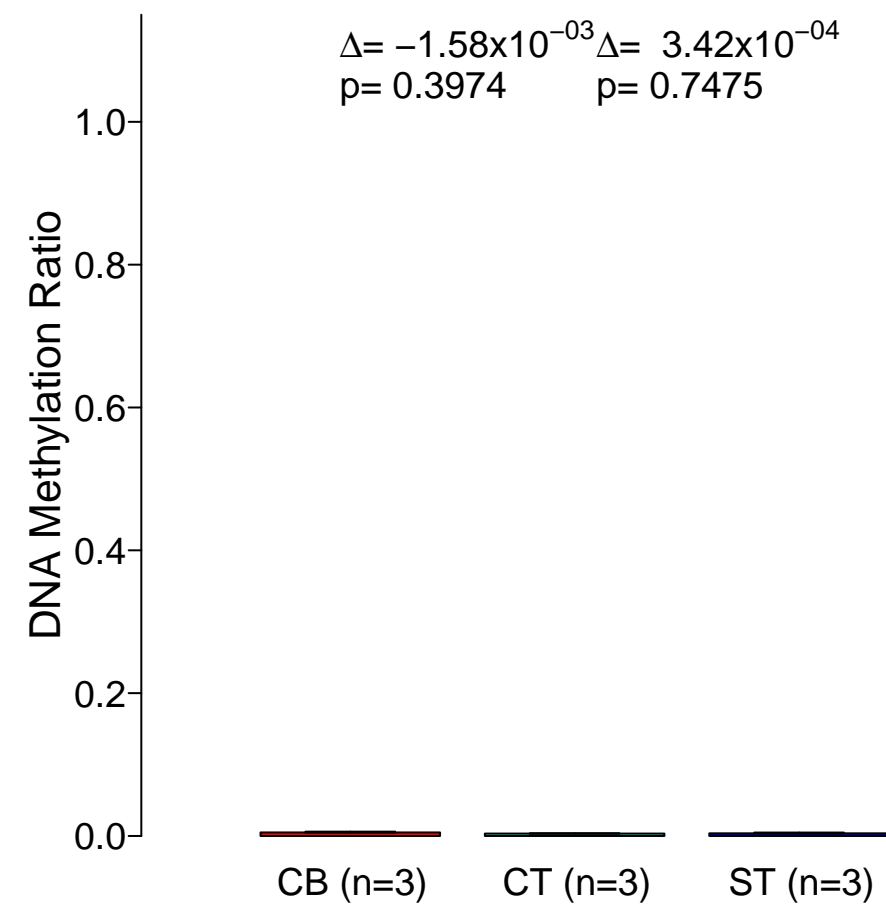

*BCL6* Chr3 187,456,755

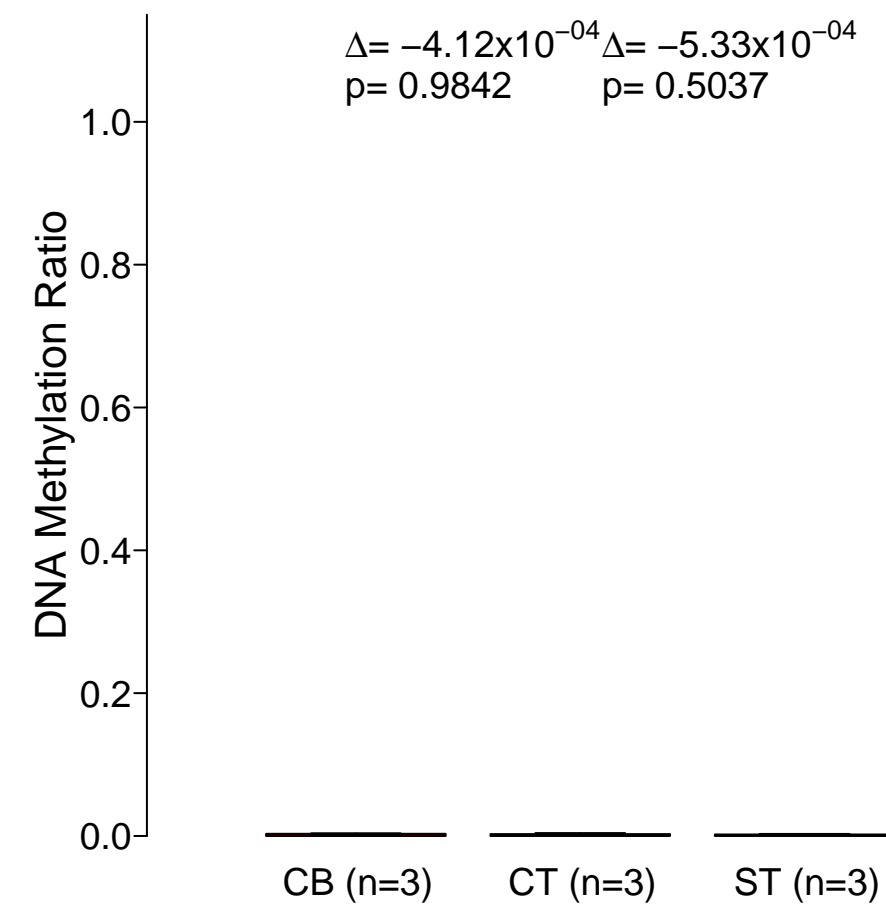

*BCL6* Chr3 187,456,771

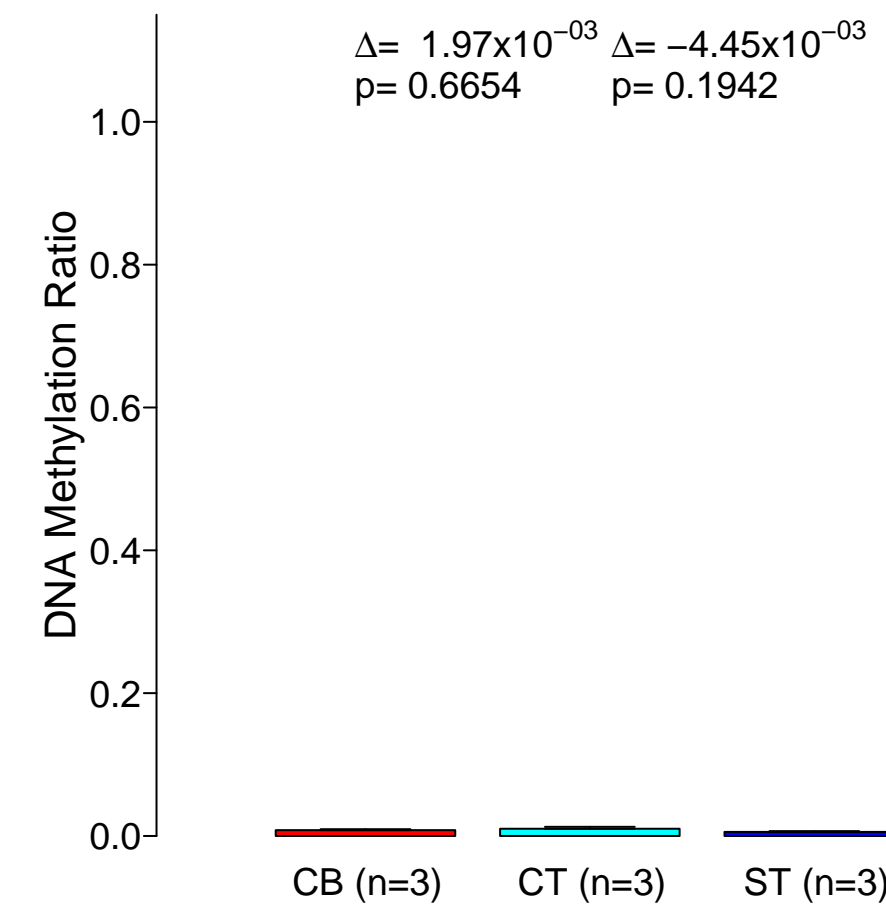

*BCL6* Chr3 187,456,781

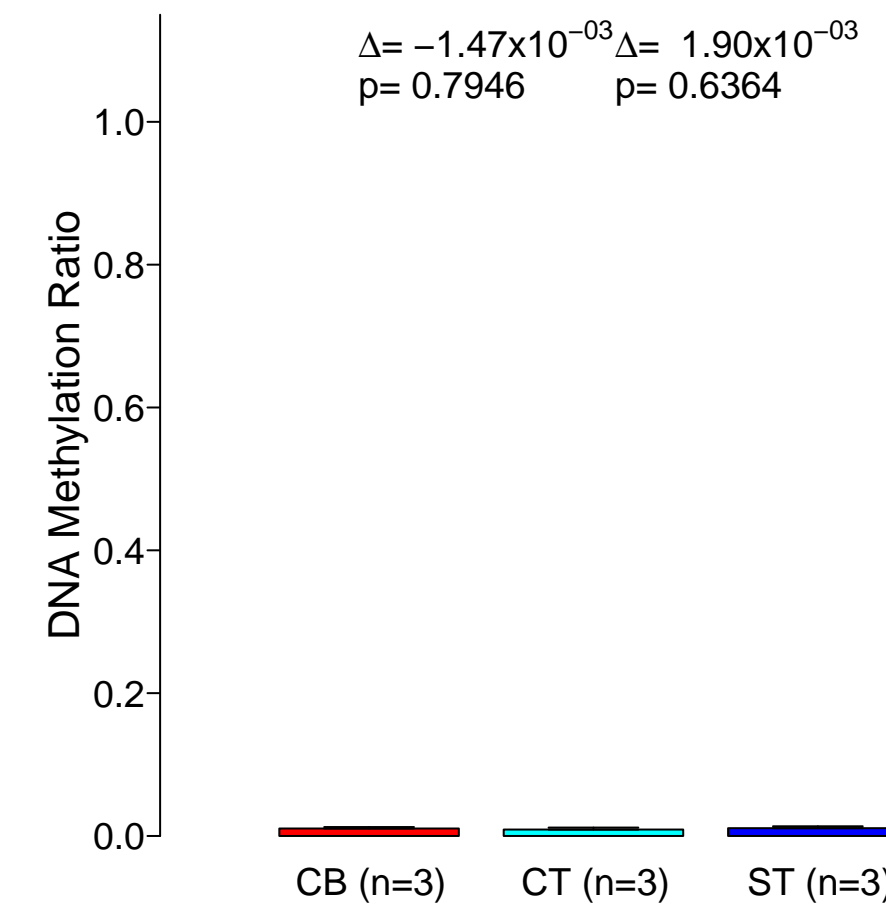

*BCL6* Chr3 187,456,814

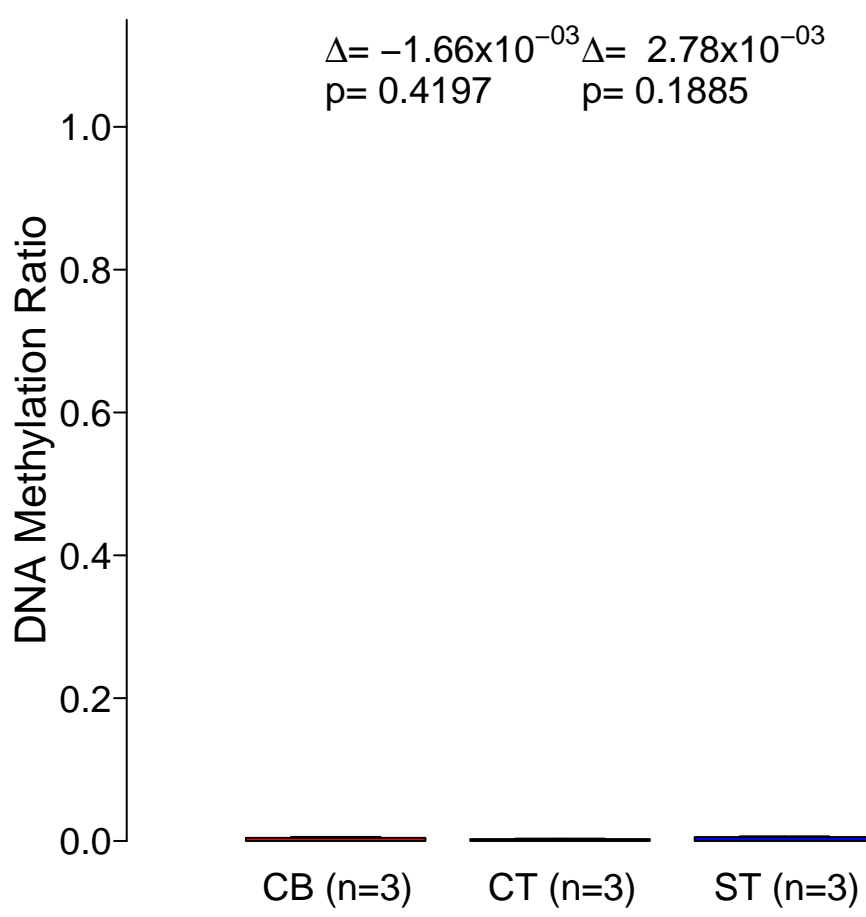

*BCL6* Chr3 187,456,829

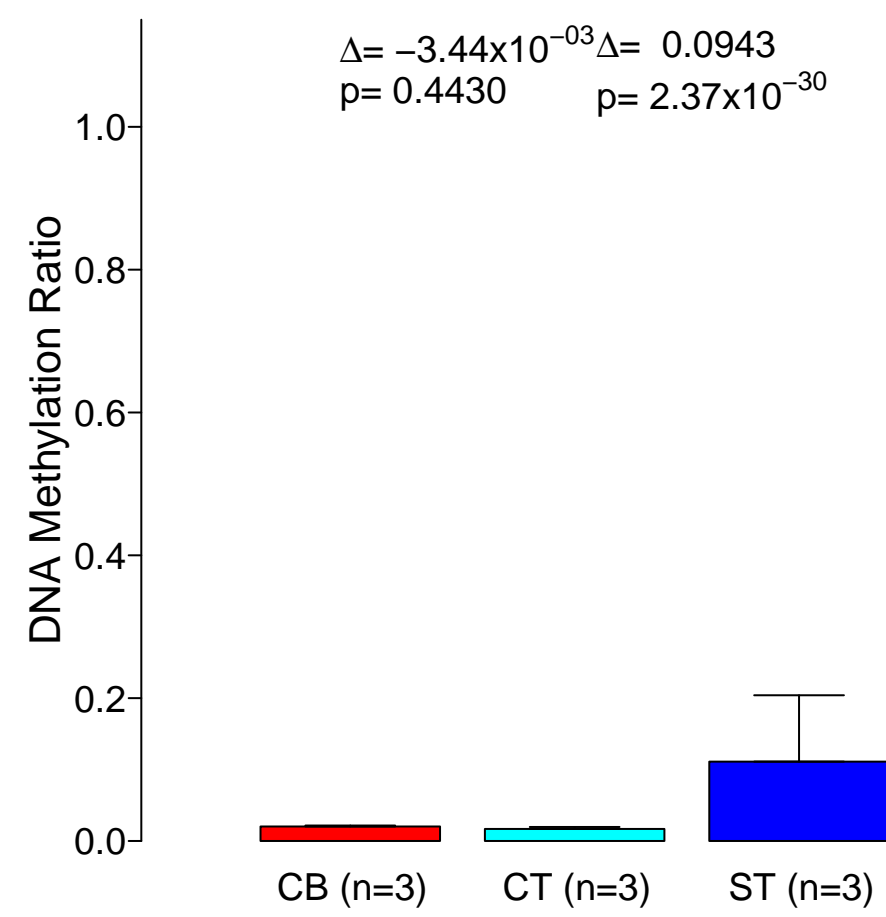

*BCL6* Chr3 187,456,874

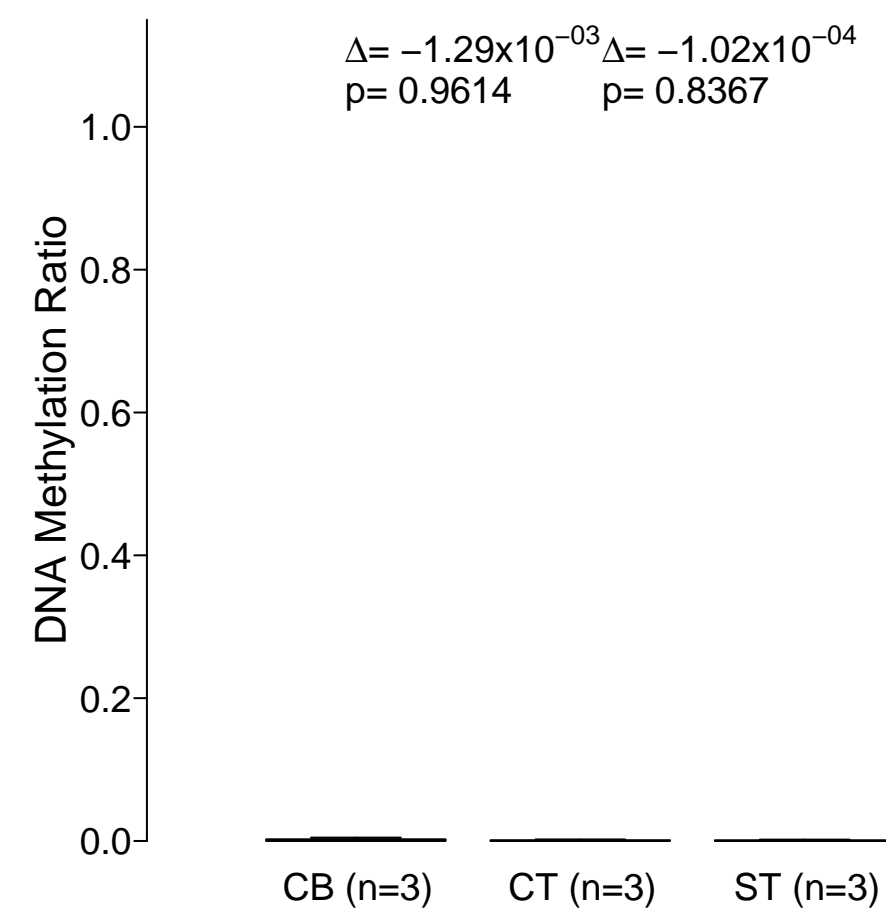

*BCL6* Chr3 187,456,893

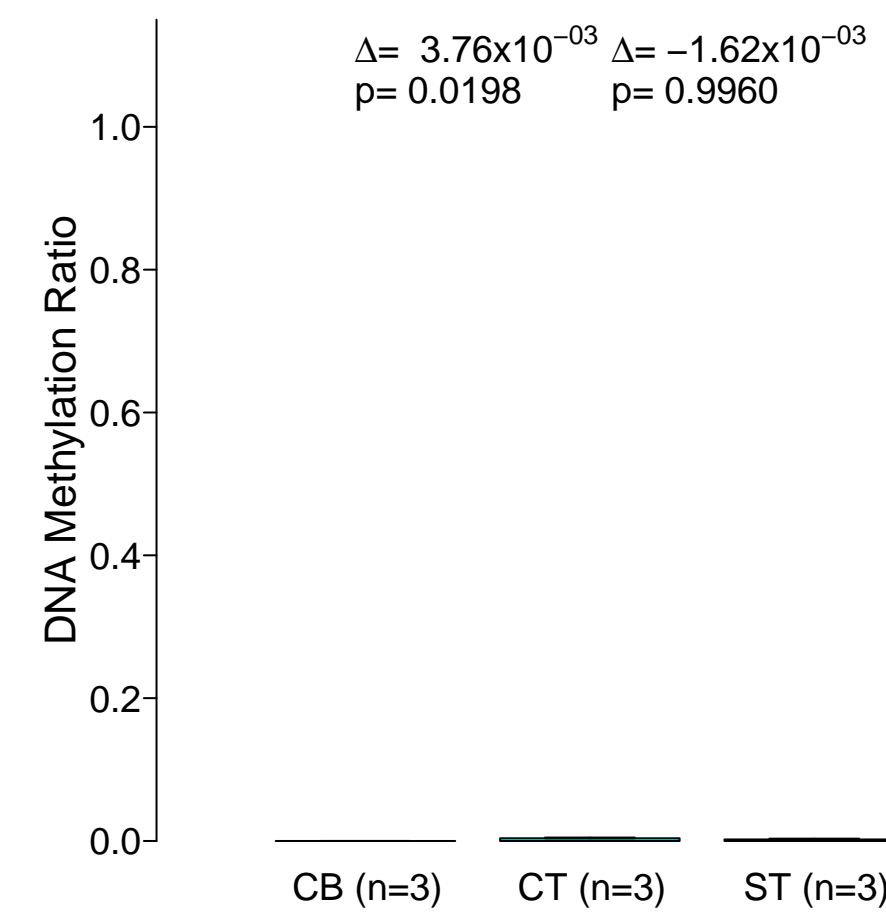

*BCL6* Chr3 187,456,971

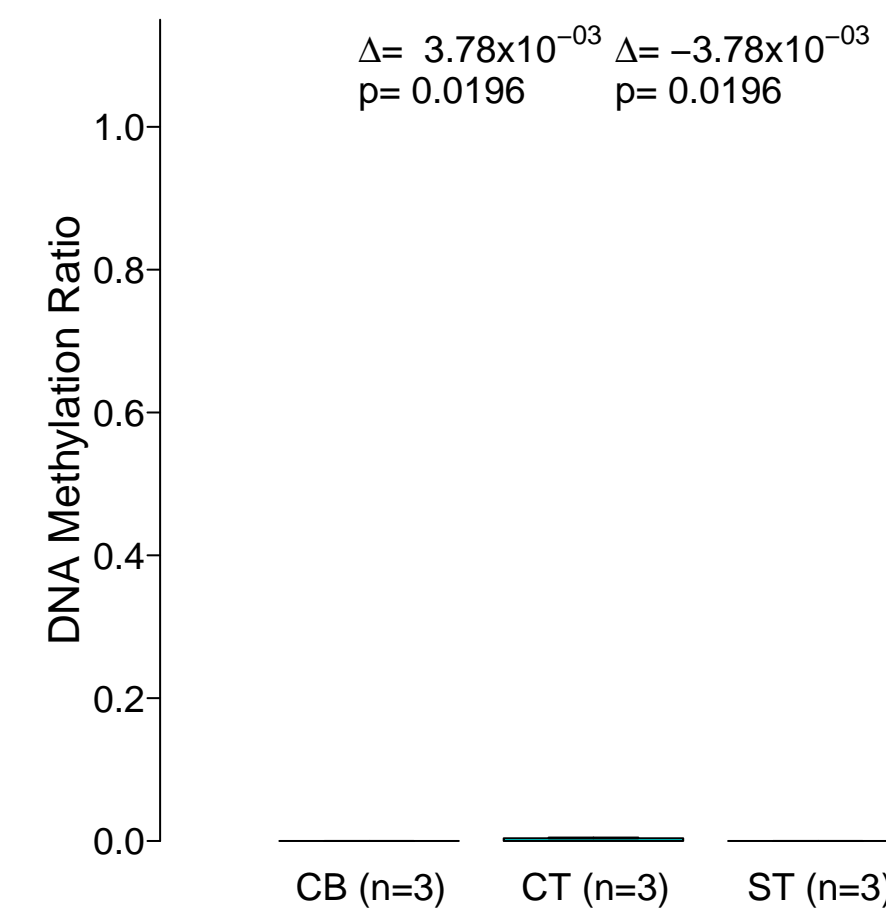

*BCL6* Chr3 187,457,055

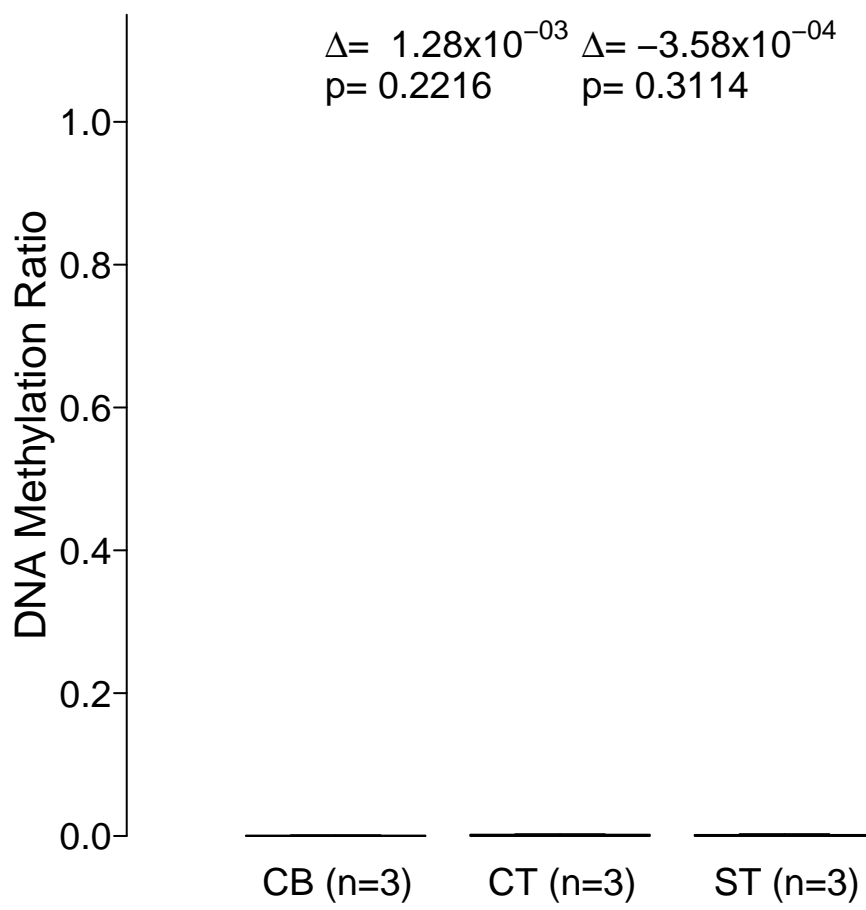

*BCL6* Chr3 187,457,067

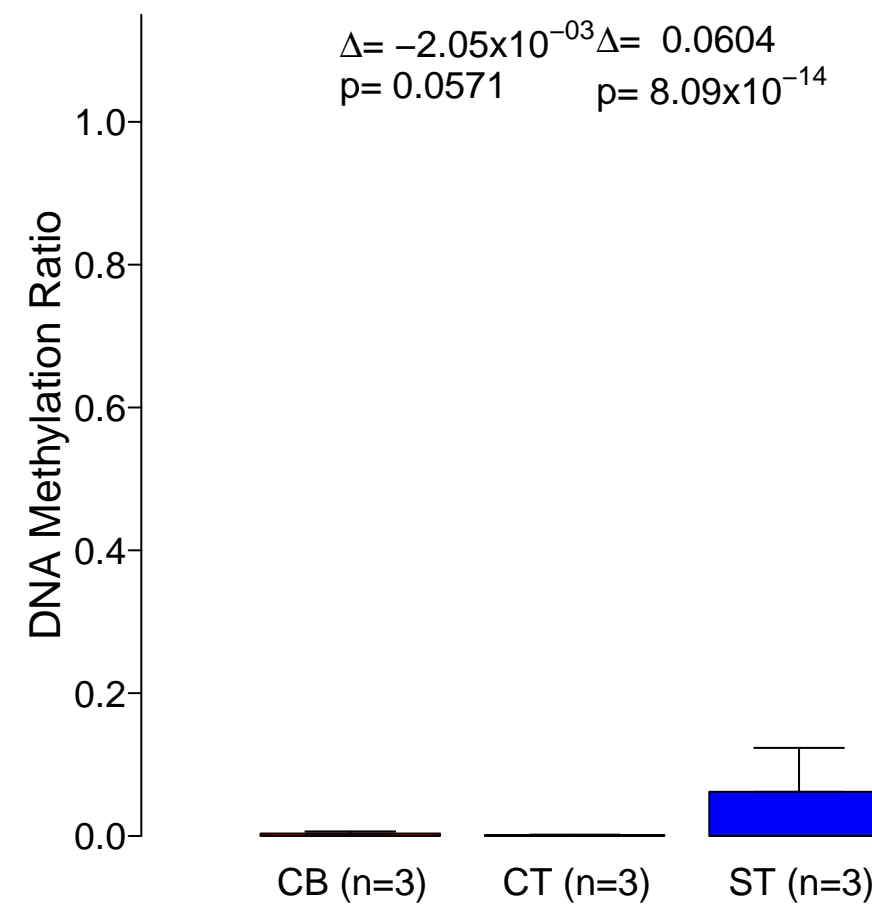

*BCL6* Chr3 187,457,084

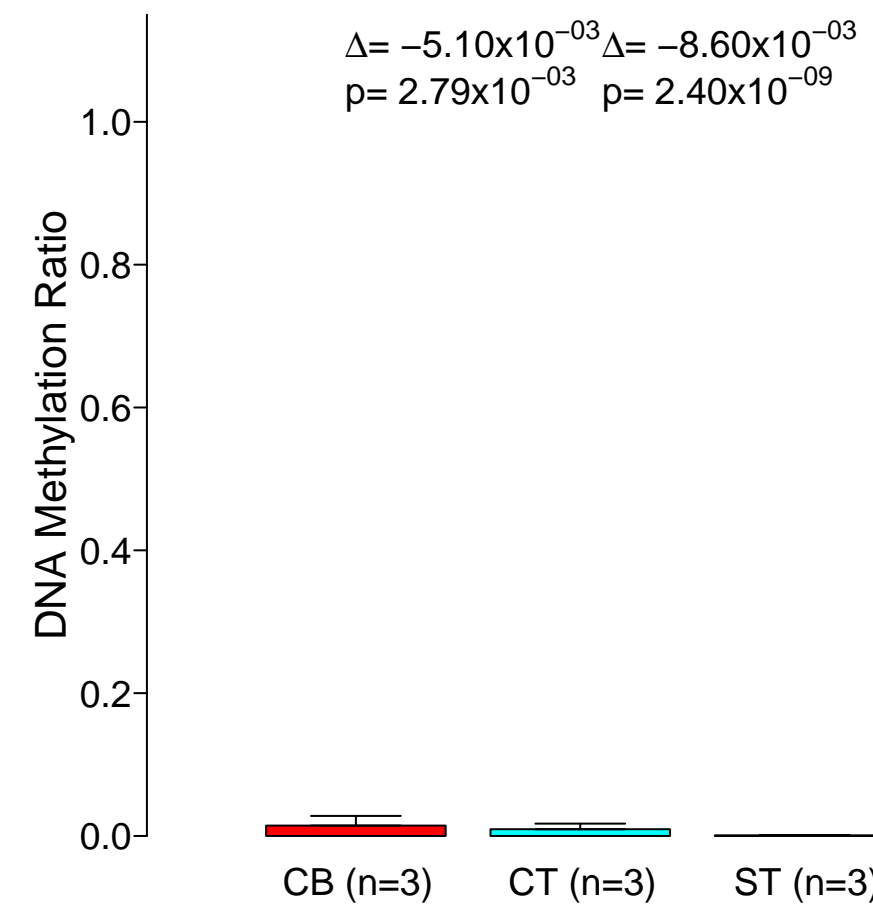

*BCL6* Chr3 187,457,095

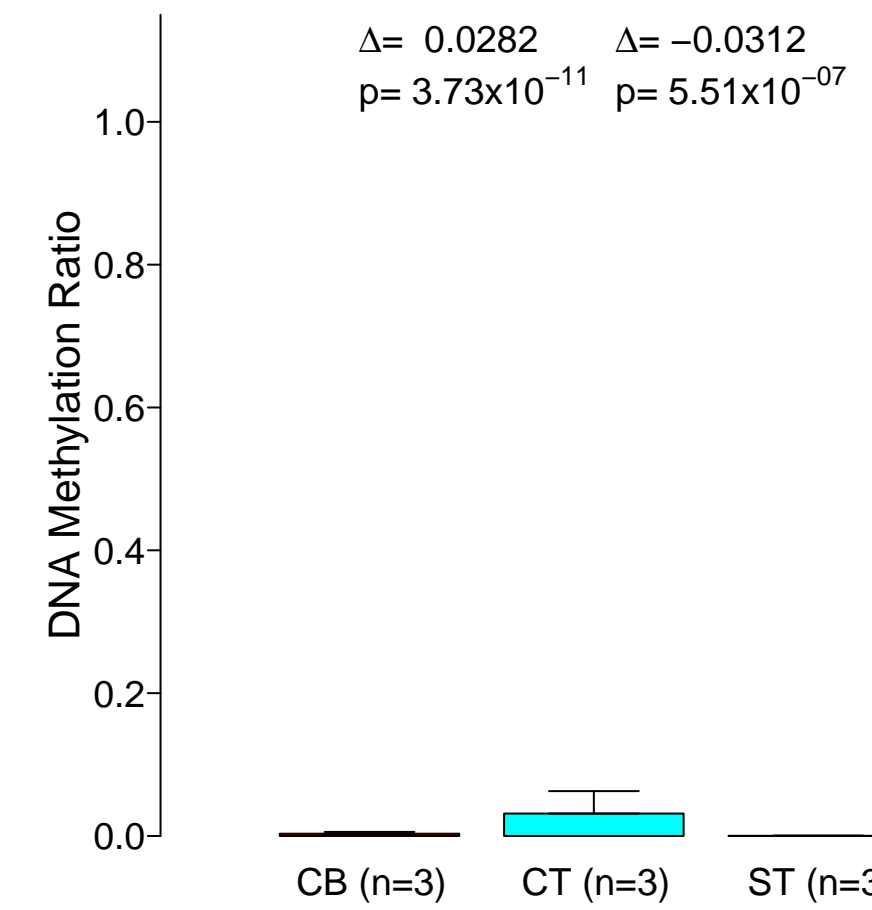

*BCL6* Chr3 187,457,128

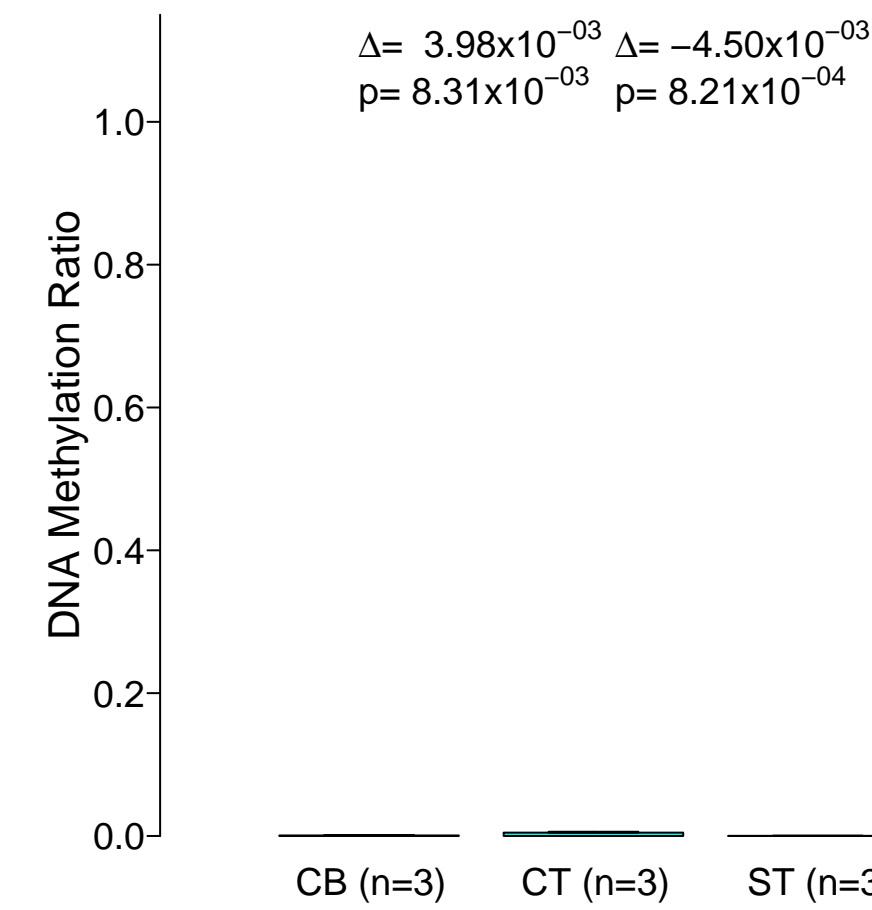

*BCL6* Chr3 187,457,144

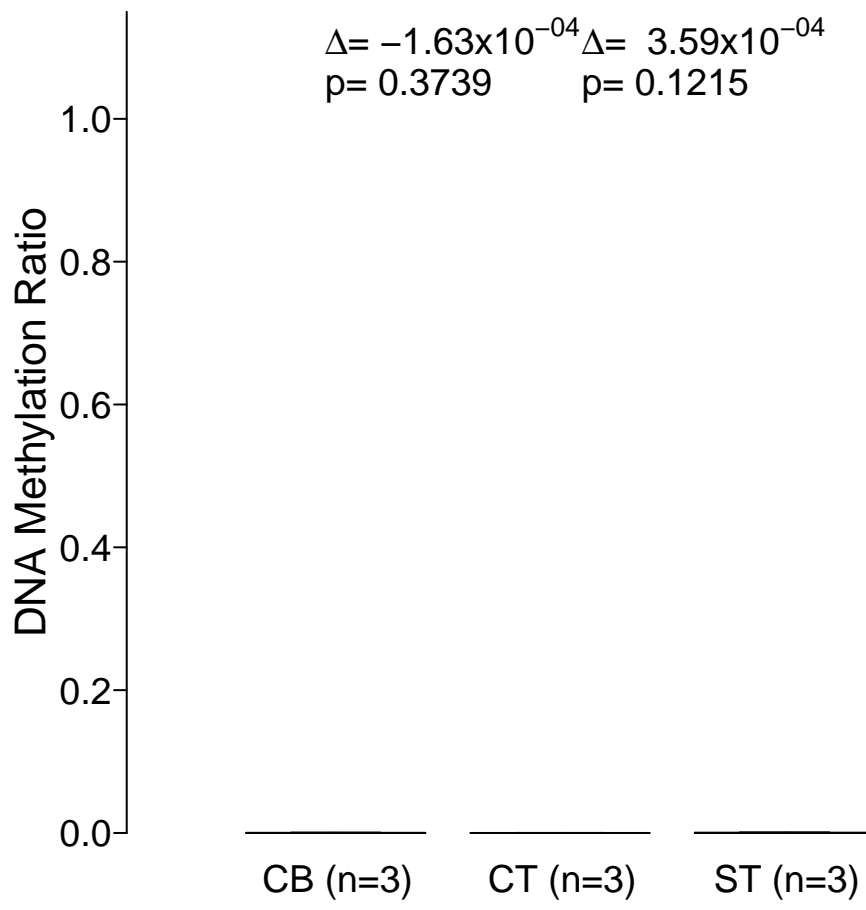

*BCL6* Chr3 187,457,151

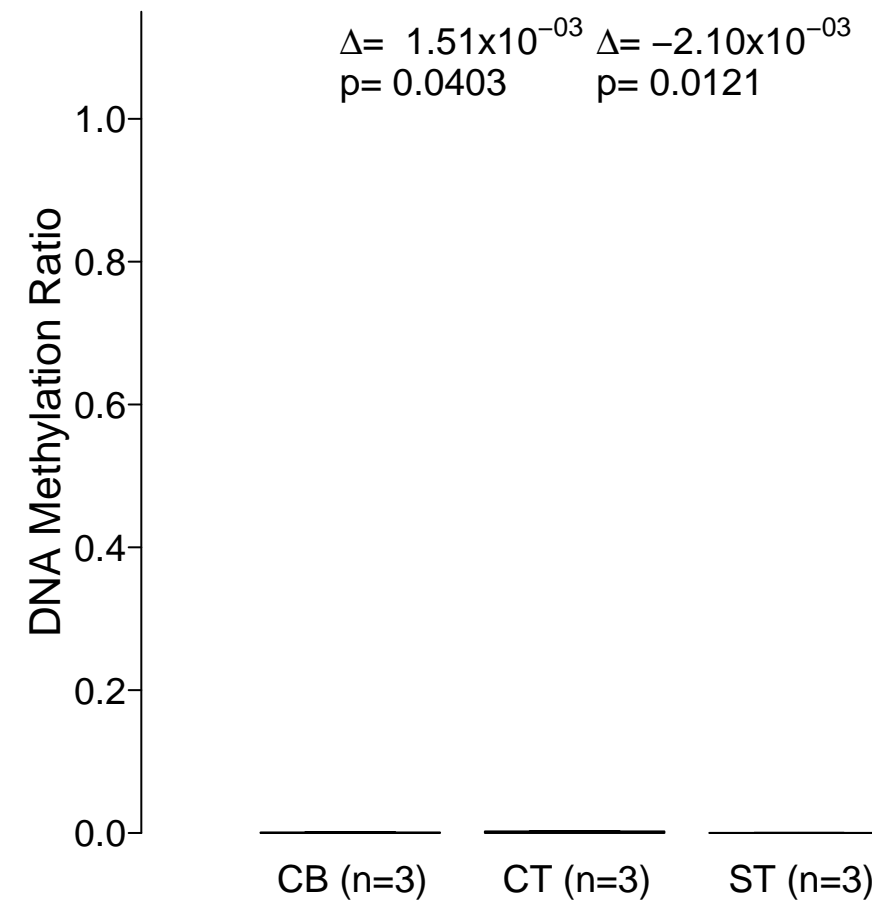

*BCL6* Chr3 187,457,154

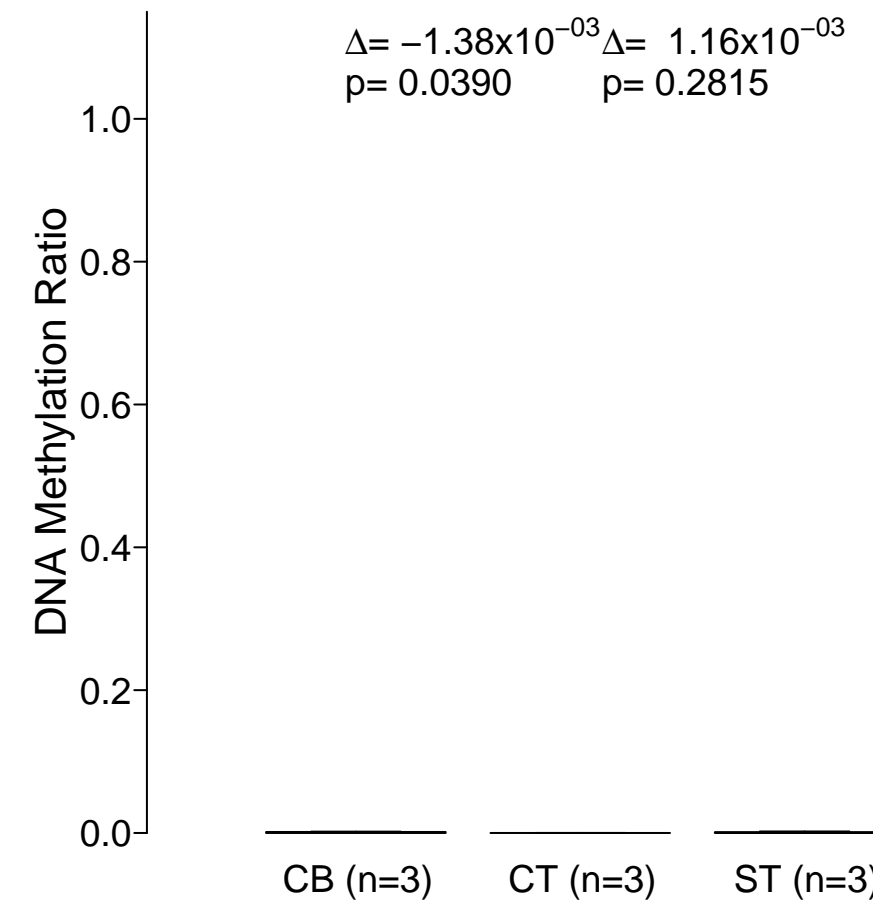

*BCL6* Chr3 187,457,175

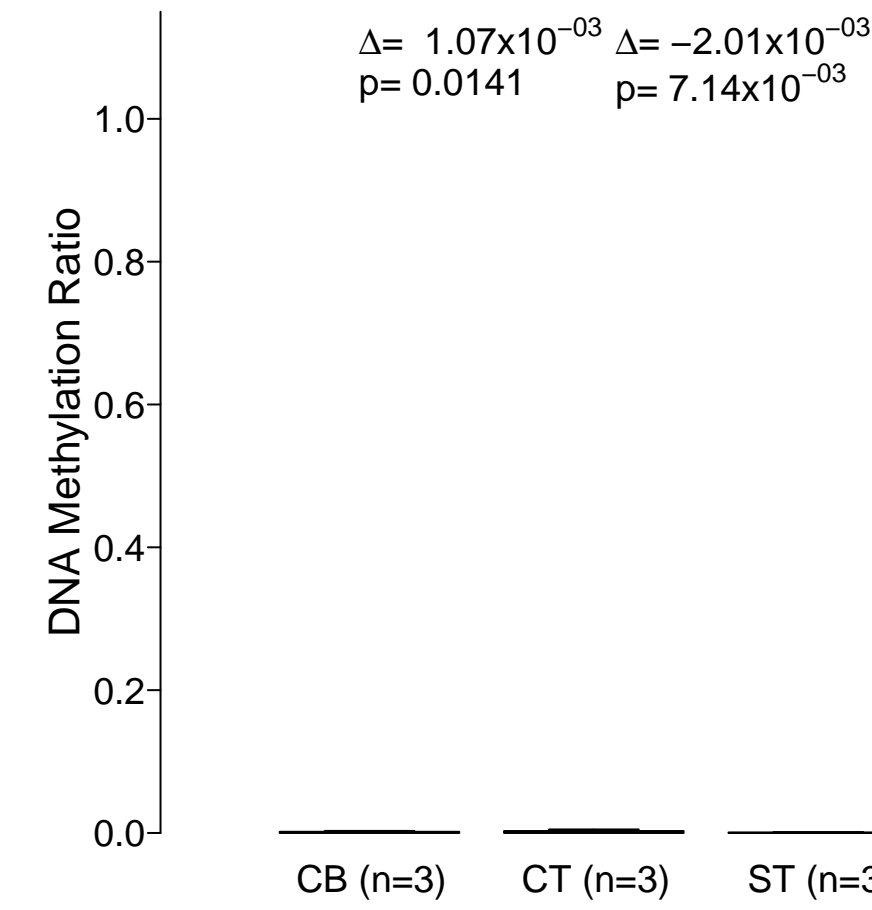

*BCL6* Chr3 187,457,177

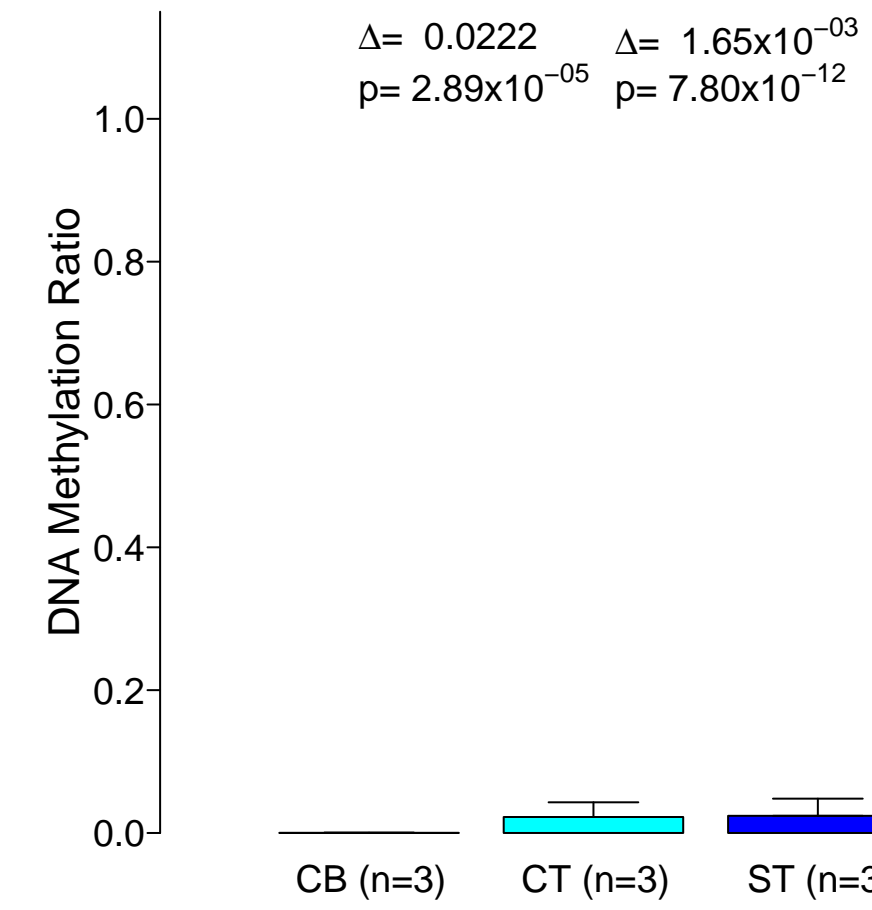

*BCL6* Chr3 187,457,212

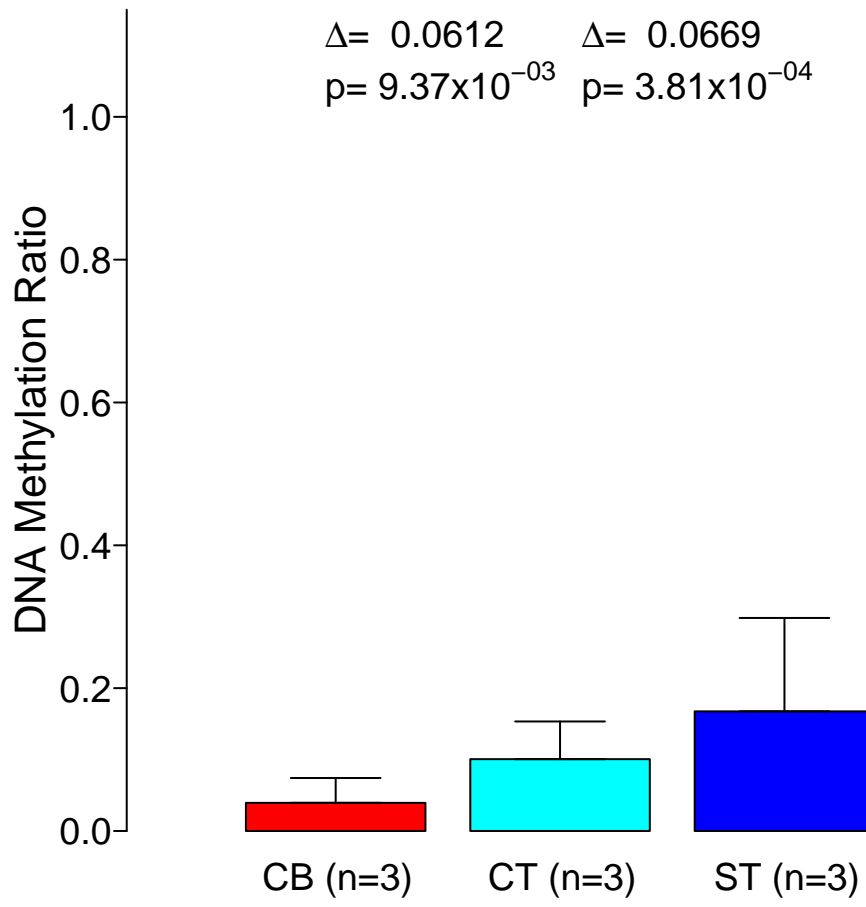

*BCL6* Chr3 187,457,231

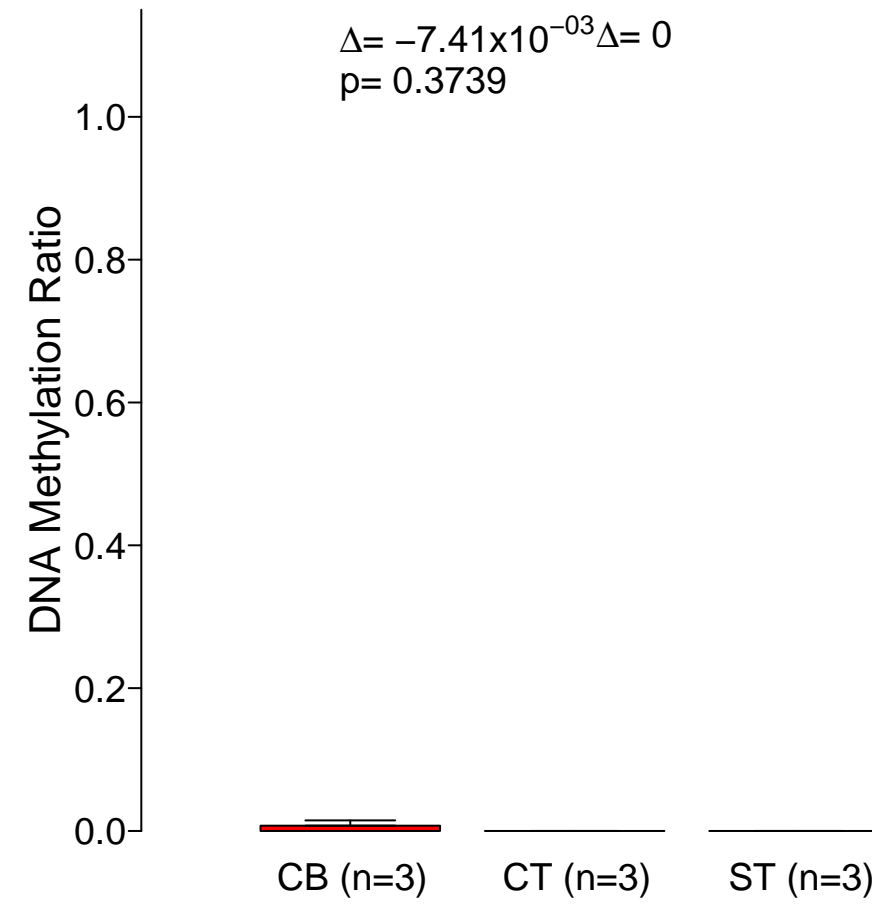

*BCL6* Chr3 187,457,248

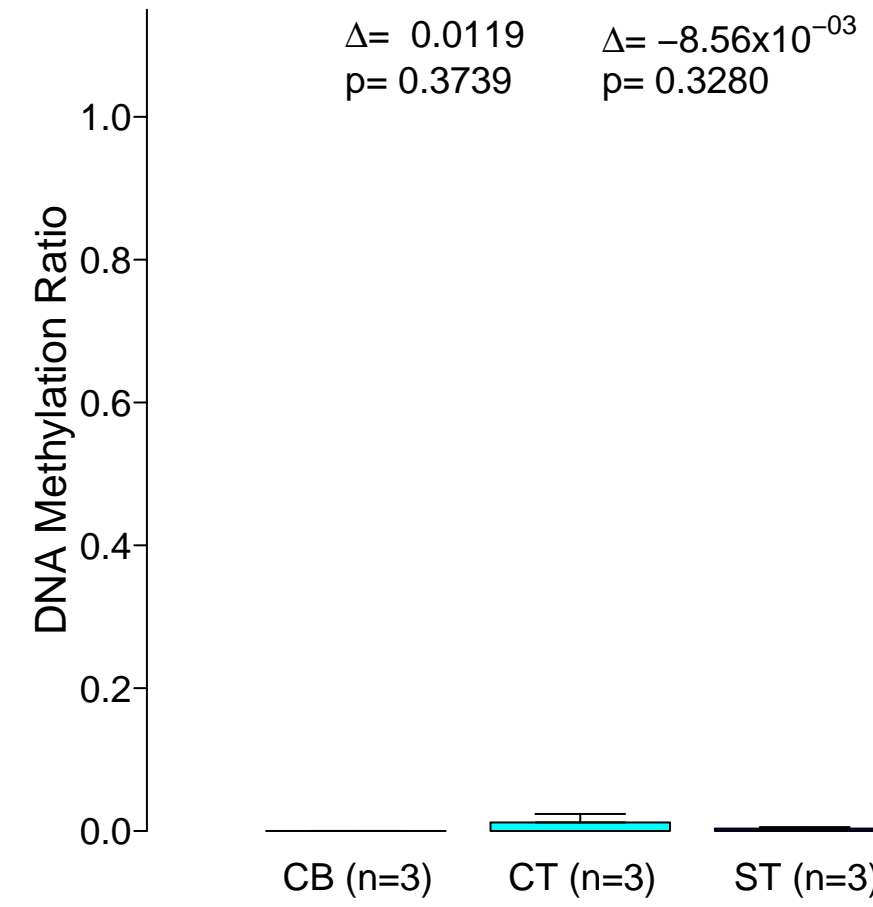

*BCL6* Chr3 187,457,264

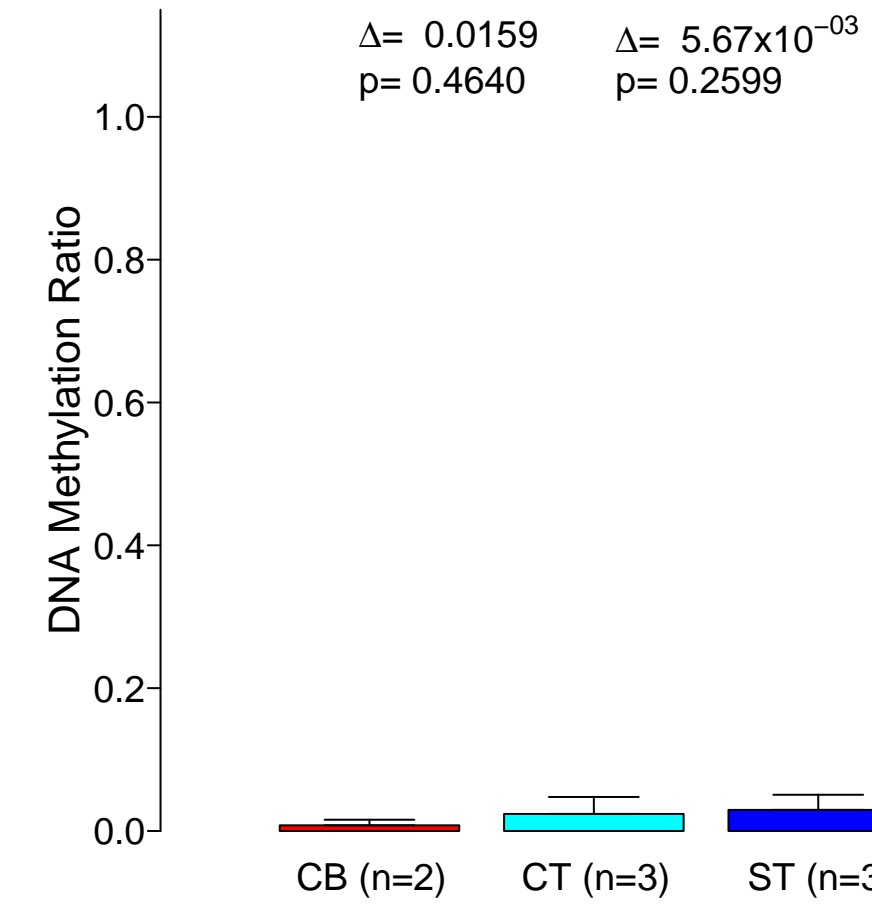

*BCL6* Chr3 187,457,276

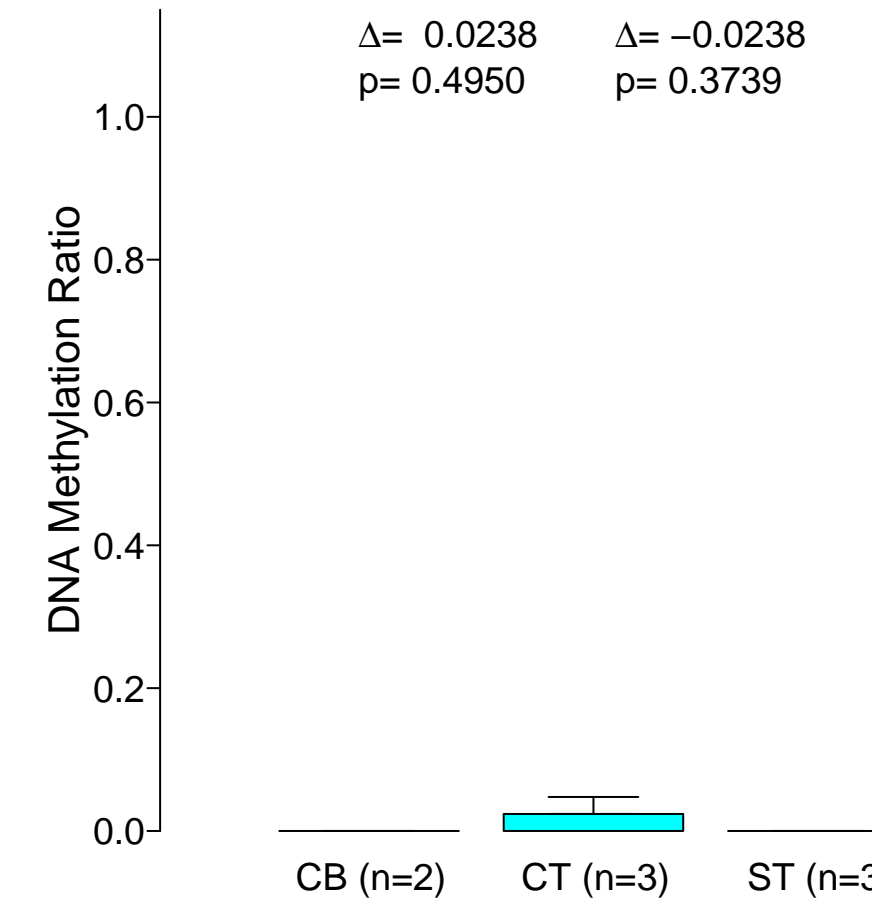

*BCL6* Chr3 187,457,278

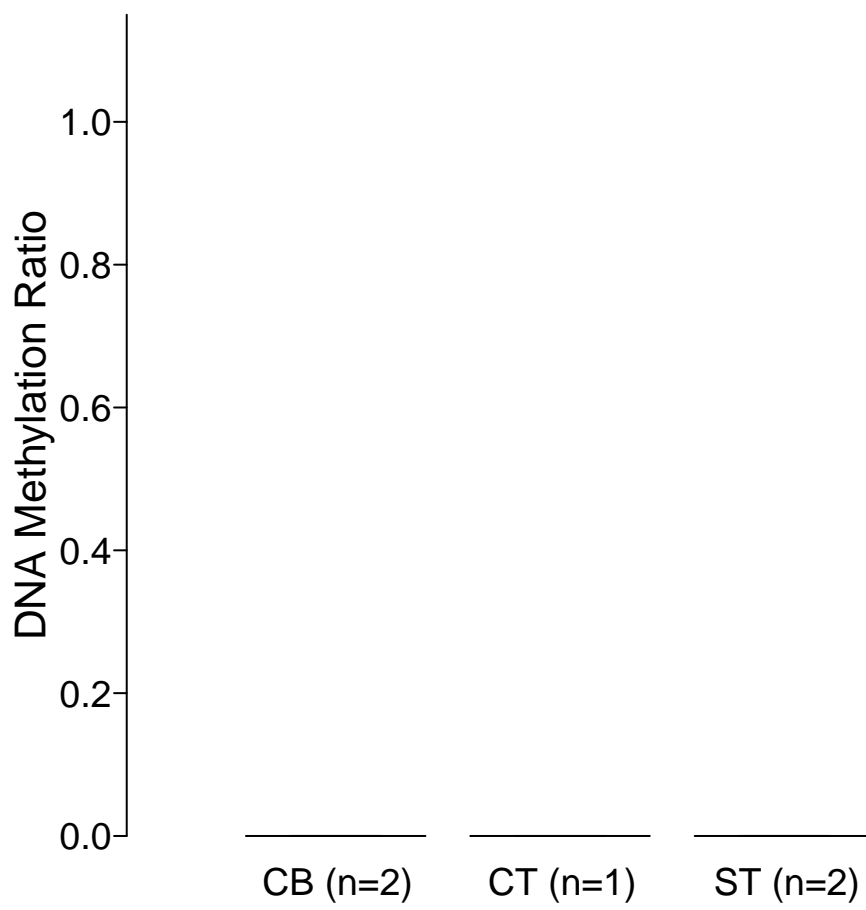

*BCL6* Chr3 187,457,287

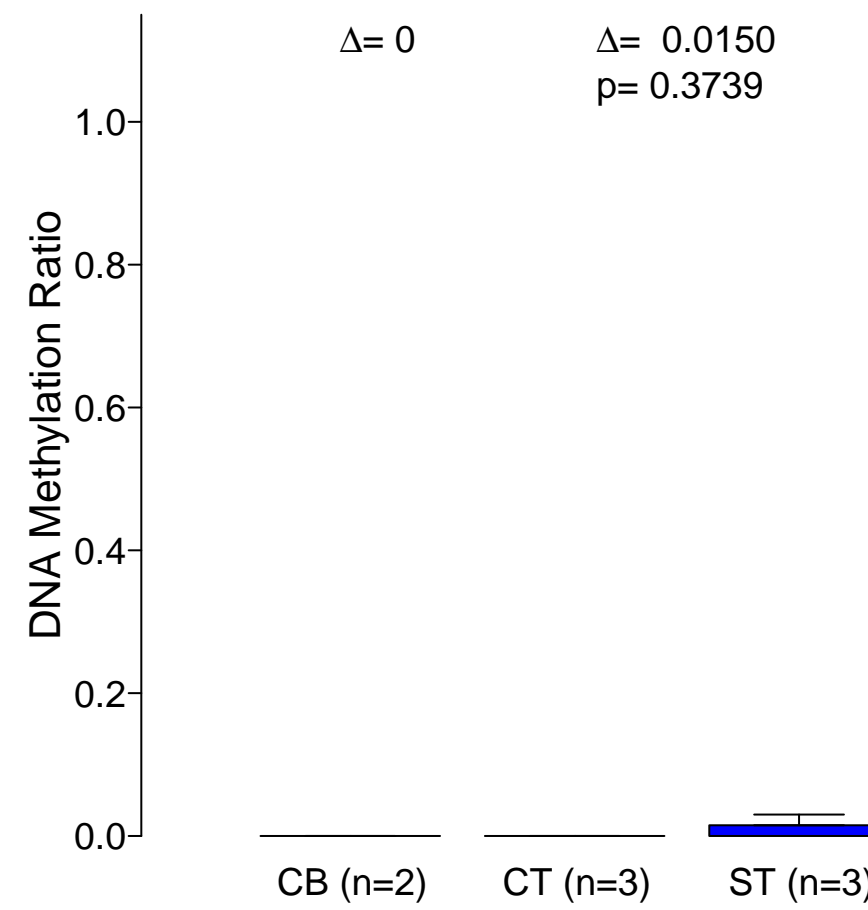

*BCL6* Chr3 187,457,294

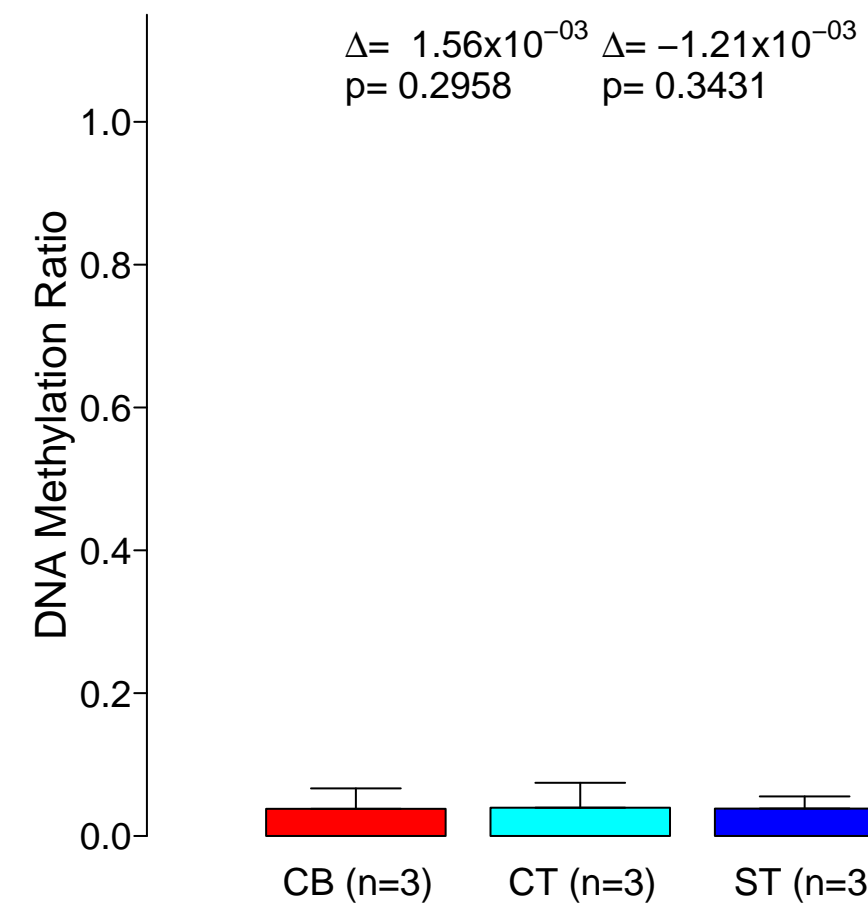

*BCL6* Chr3 187,457,307

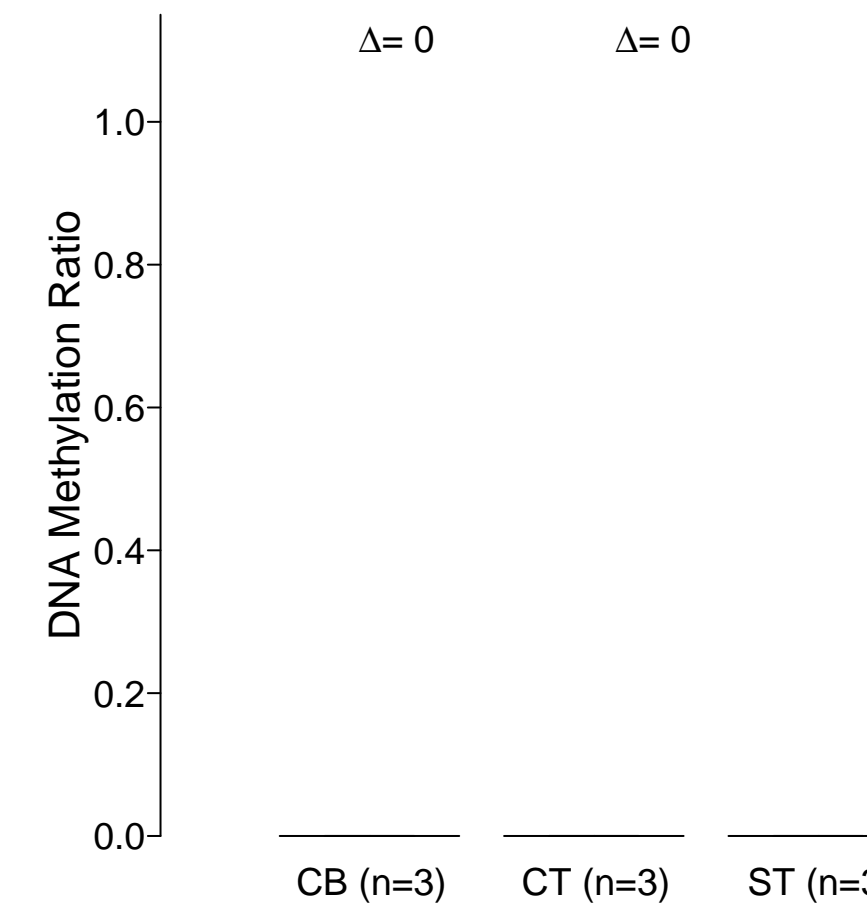

*BCL6* Chr3 187,457,316

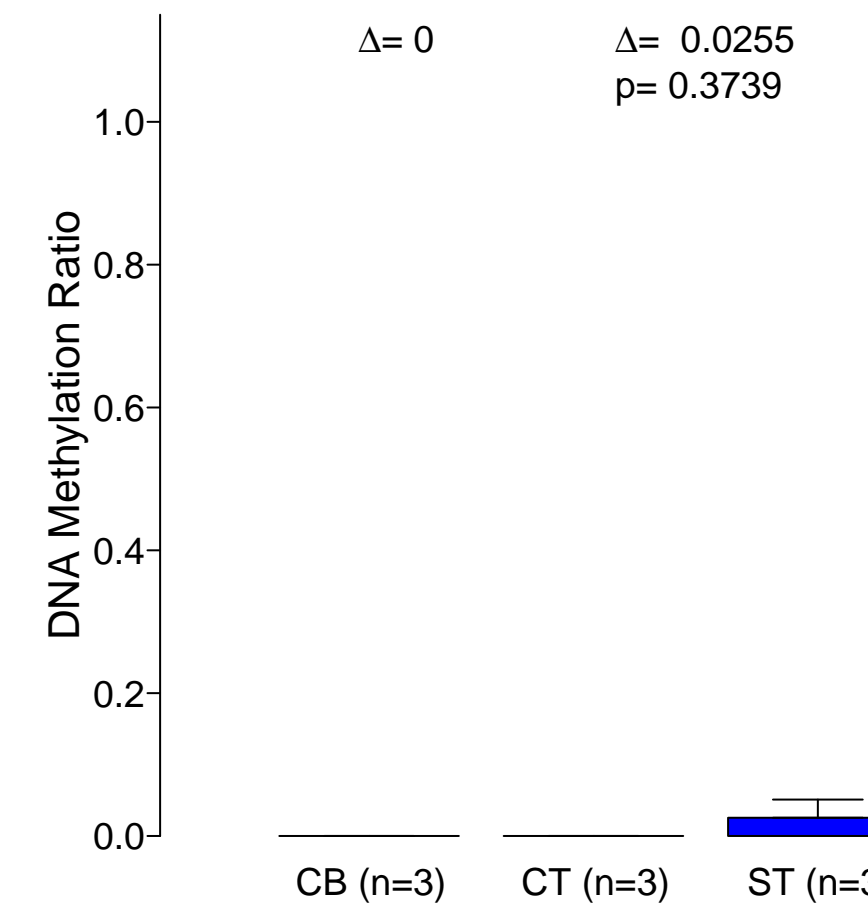

*BCL6* Chr3 187,457,350

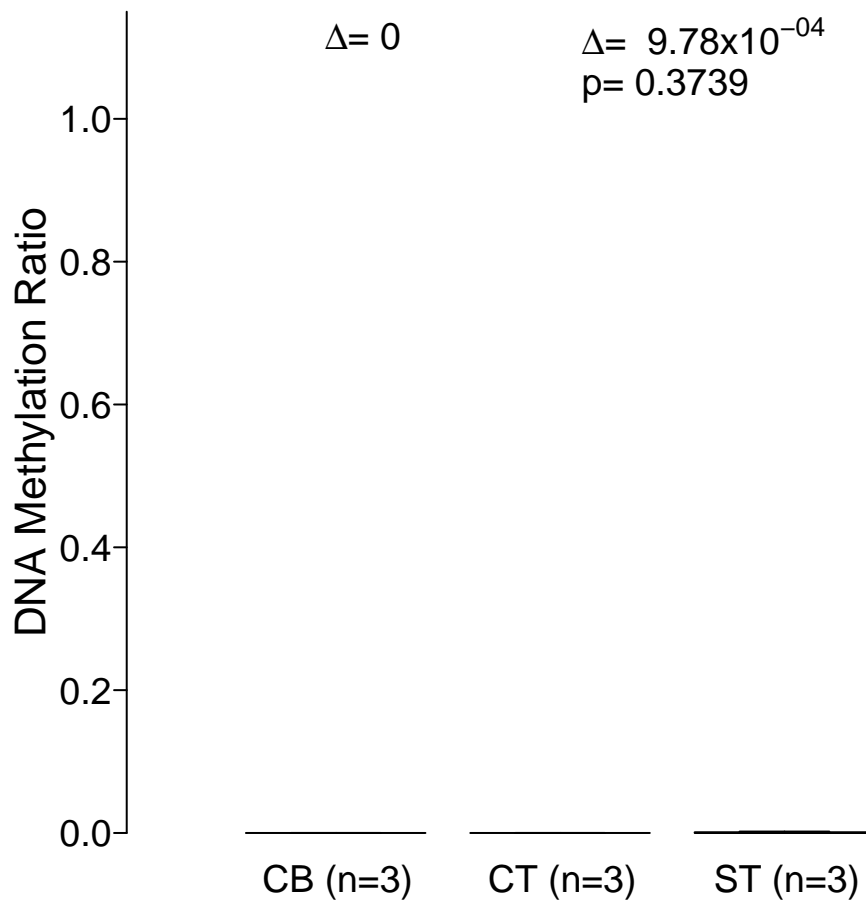

*BCL6* Chr3 187,457,457

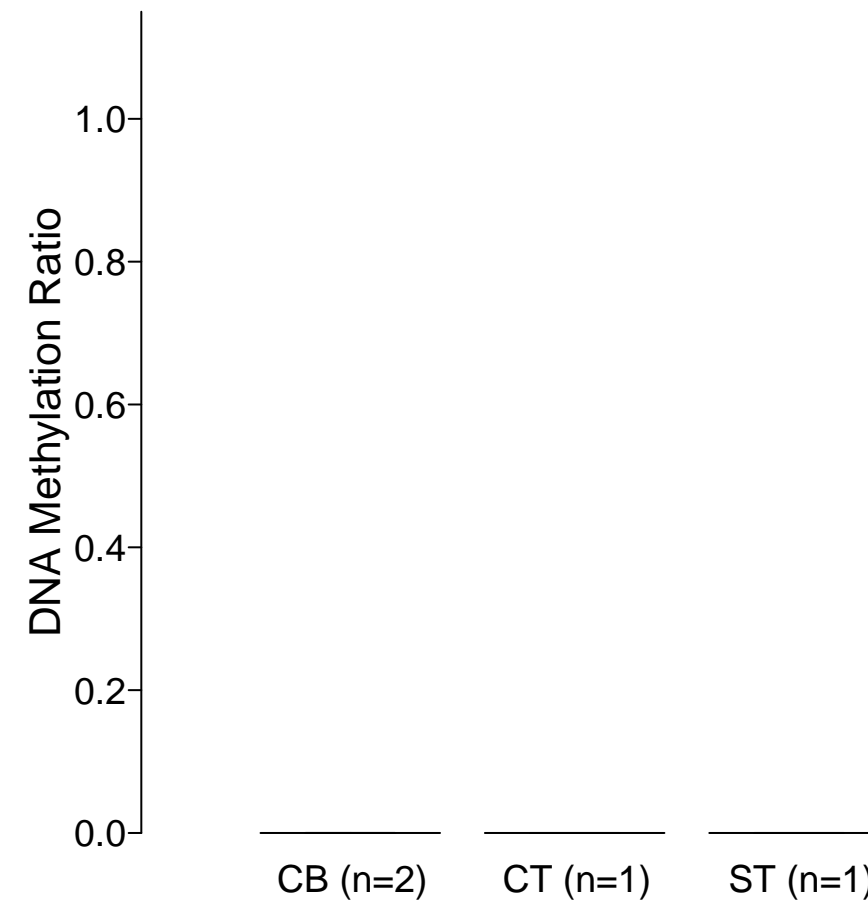

*BCL6* Chr3 187,457,468

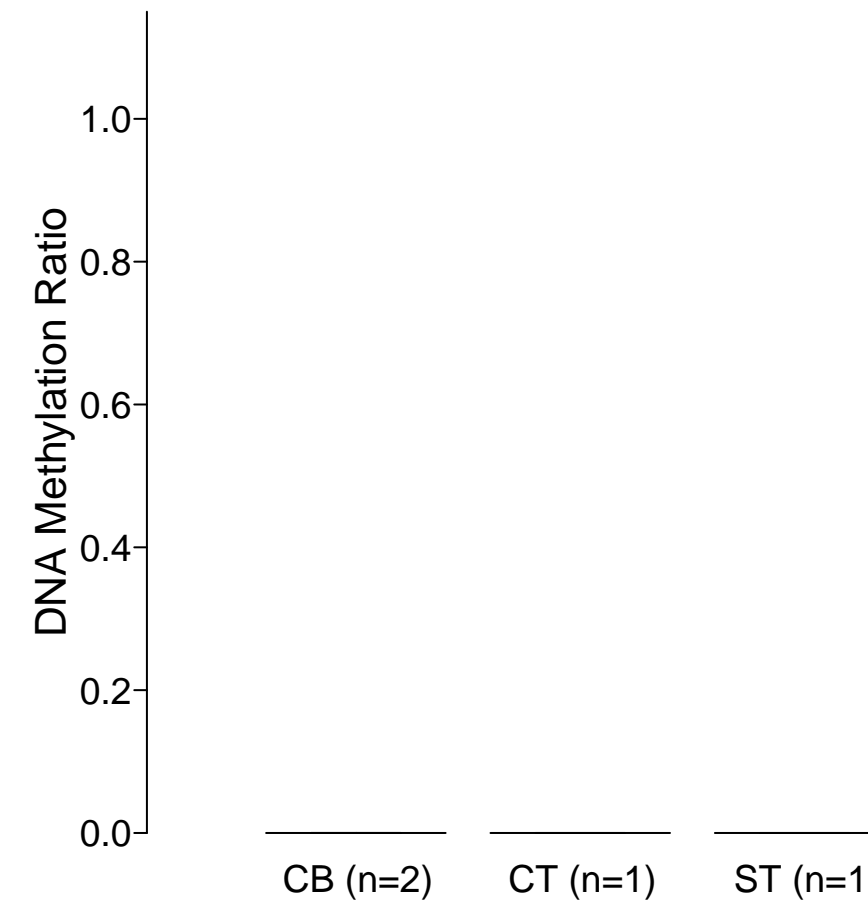

*BCL6* Chr3 187,457,475

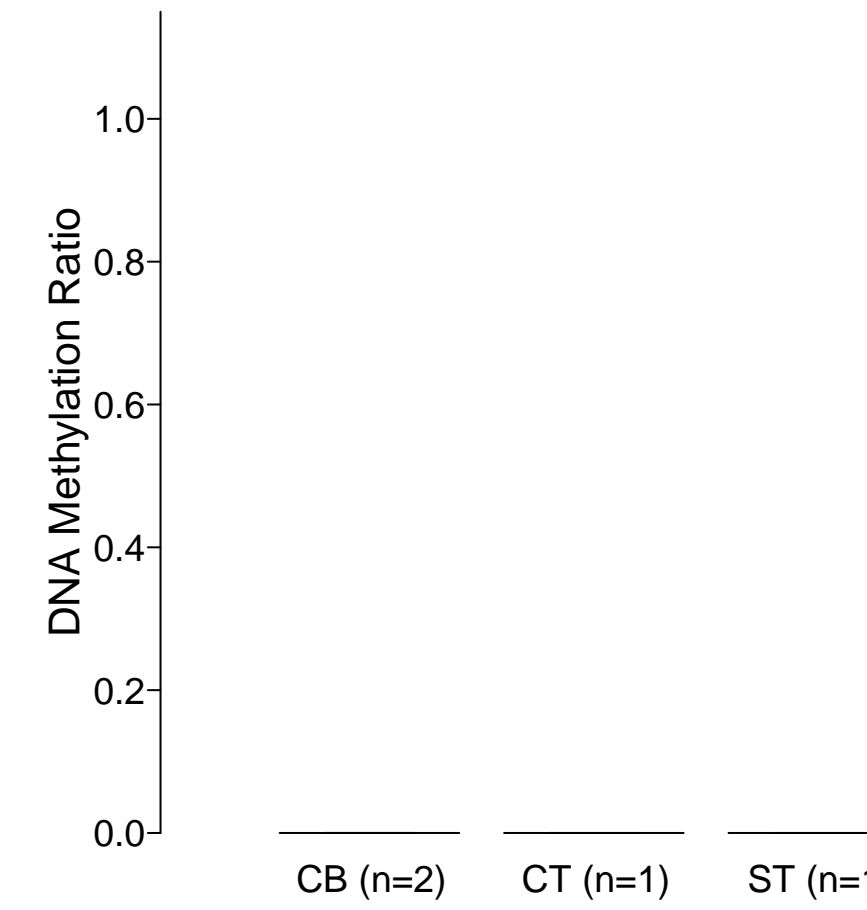

*BCL6* Chr3 187,457,477

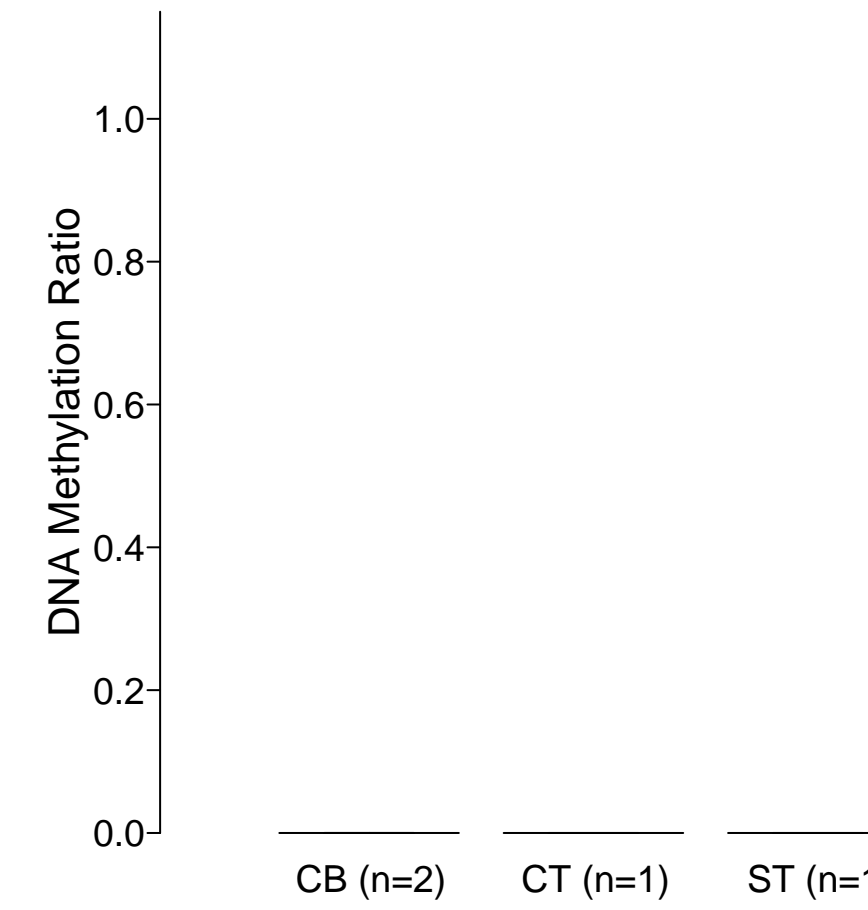

*BCL6* Chr3 187,457,500

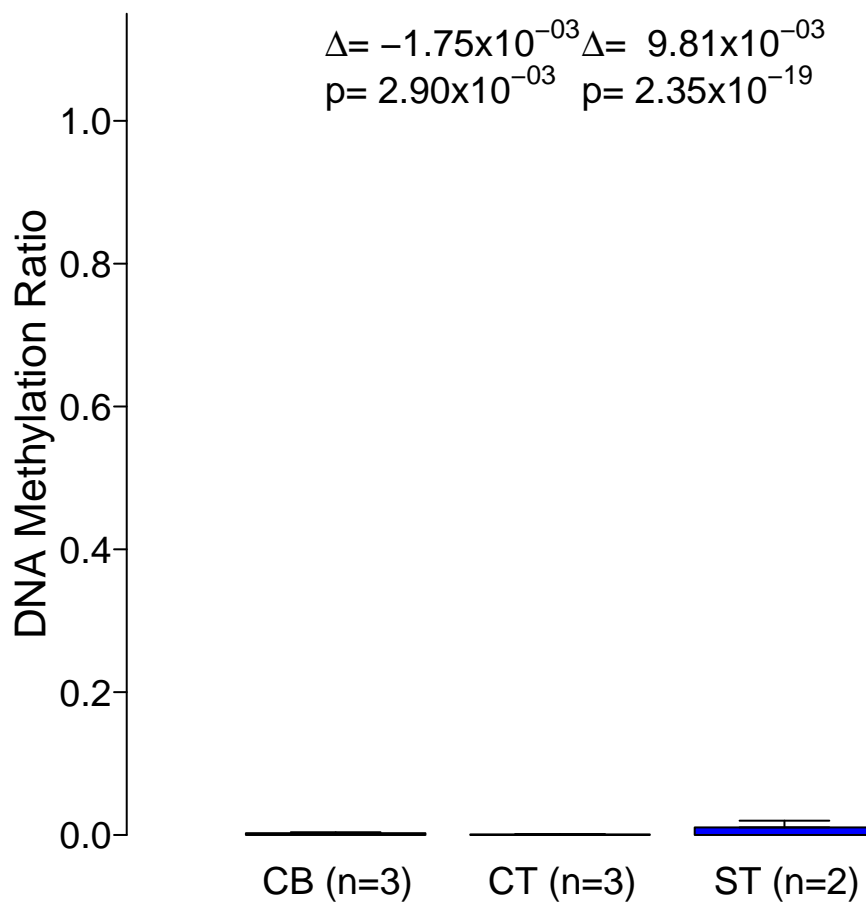

*BCL6* Chr3 187,457,520

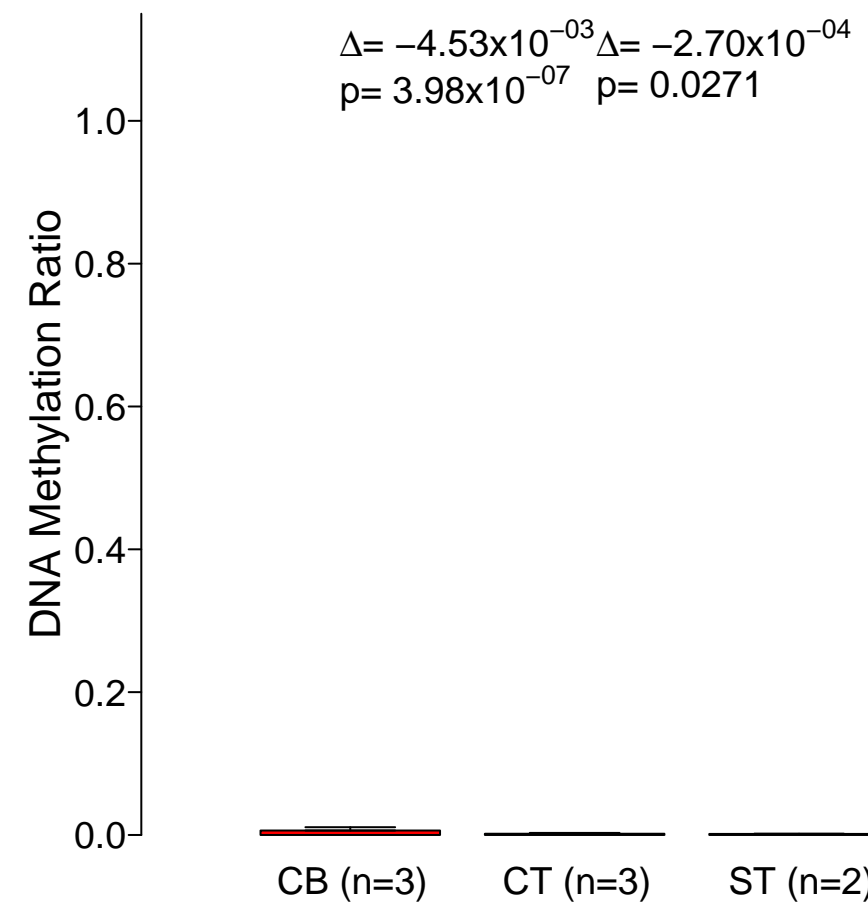

*BCL6* Chr3 187,457,522

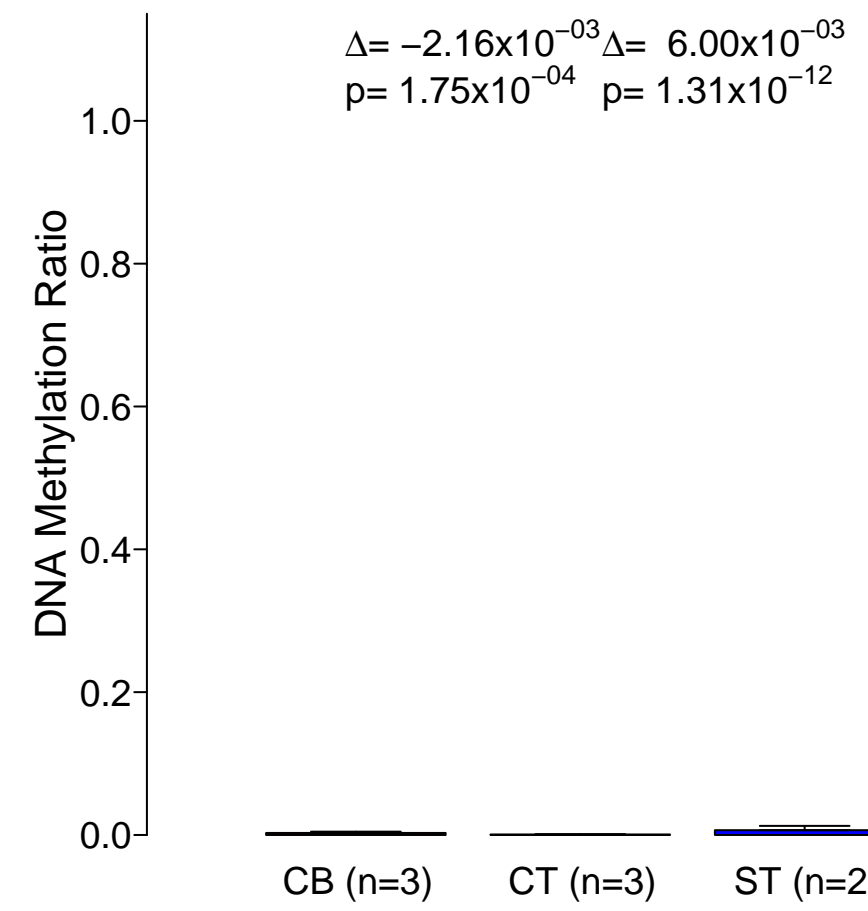

*BCL6* Chr3 187,457,527

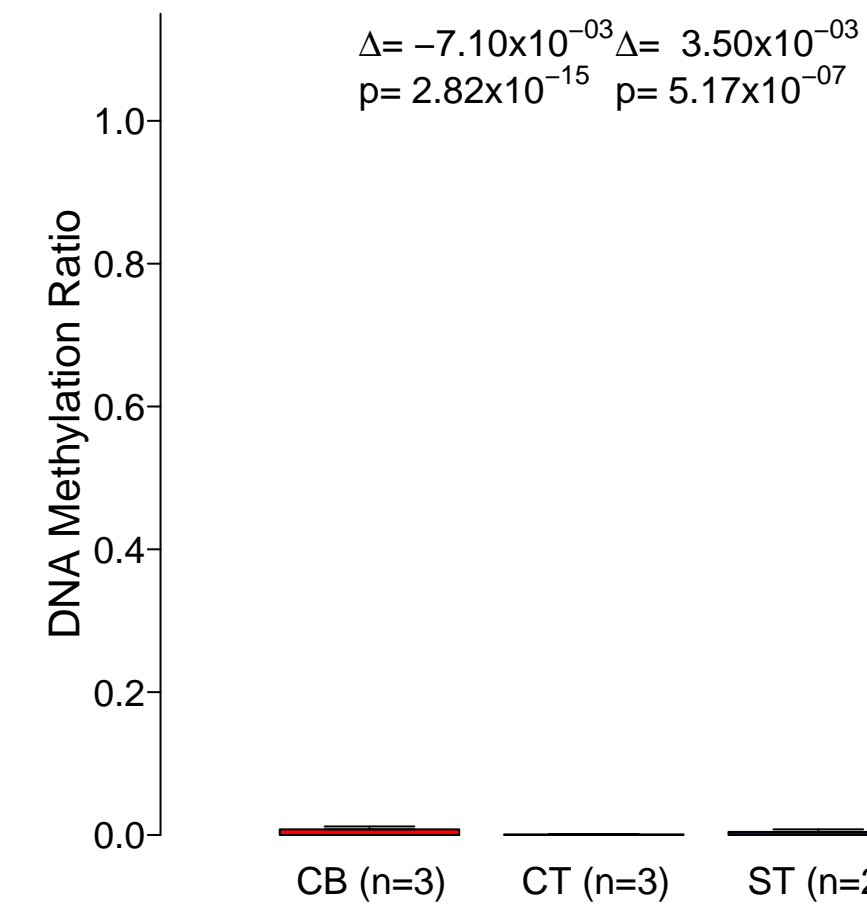

*BCL6* Chr3 187,457,543

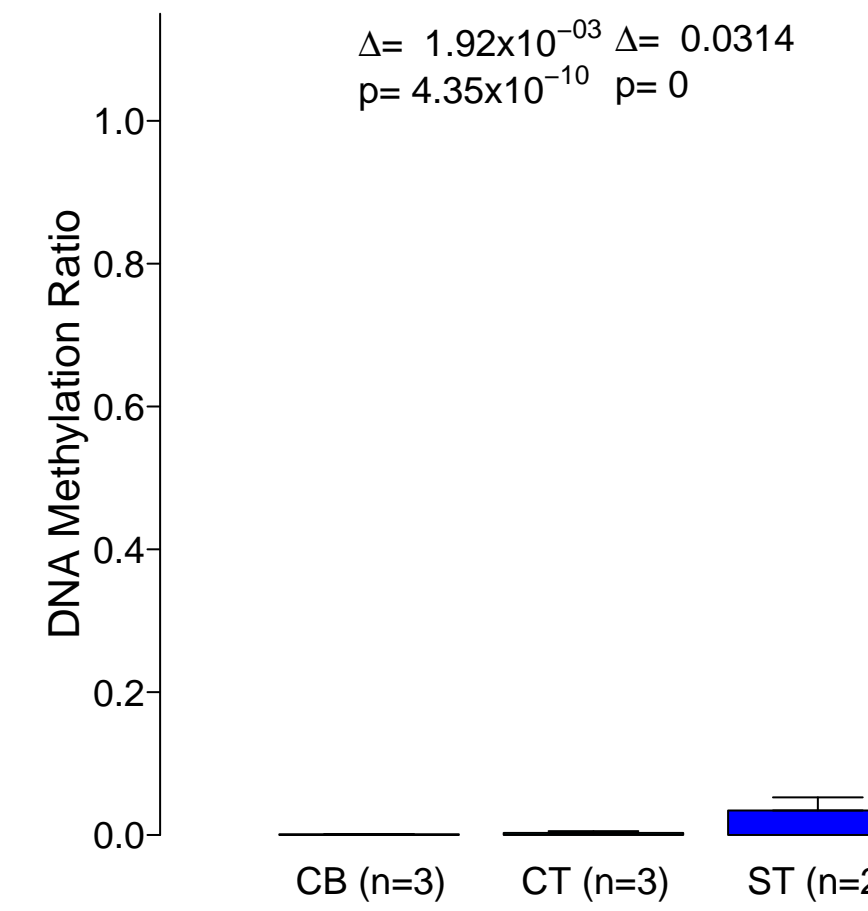

*BCL6* Chr3 187,457,547

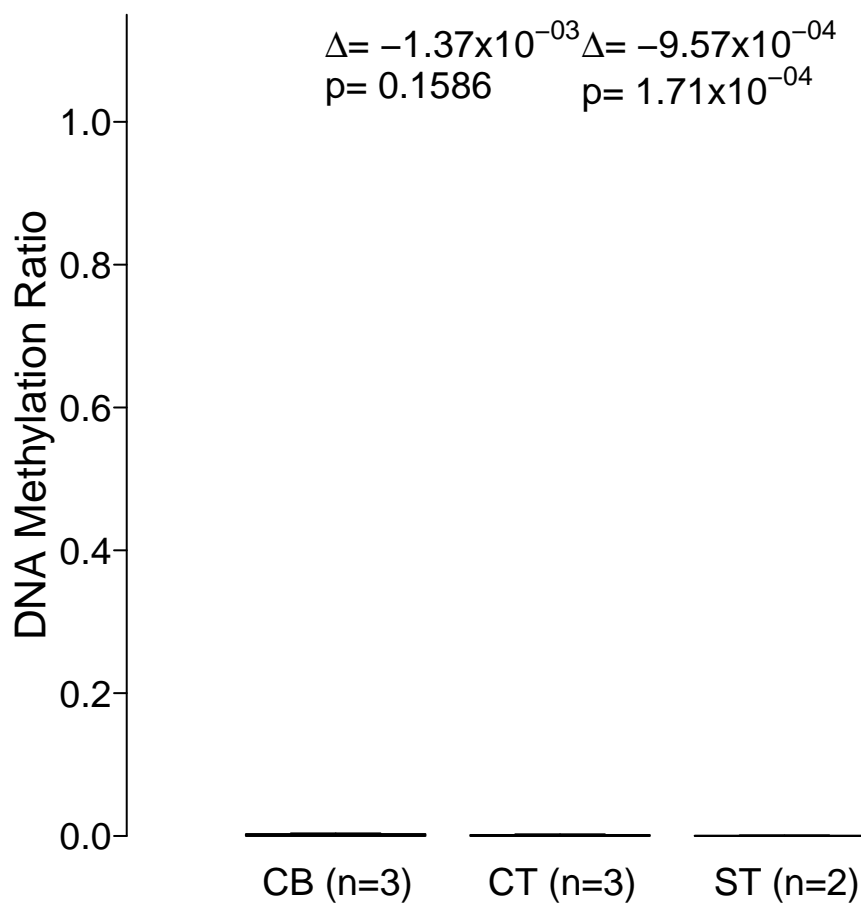

*BCL6* Chr3 187,457,588

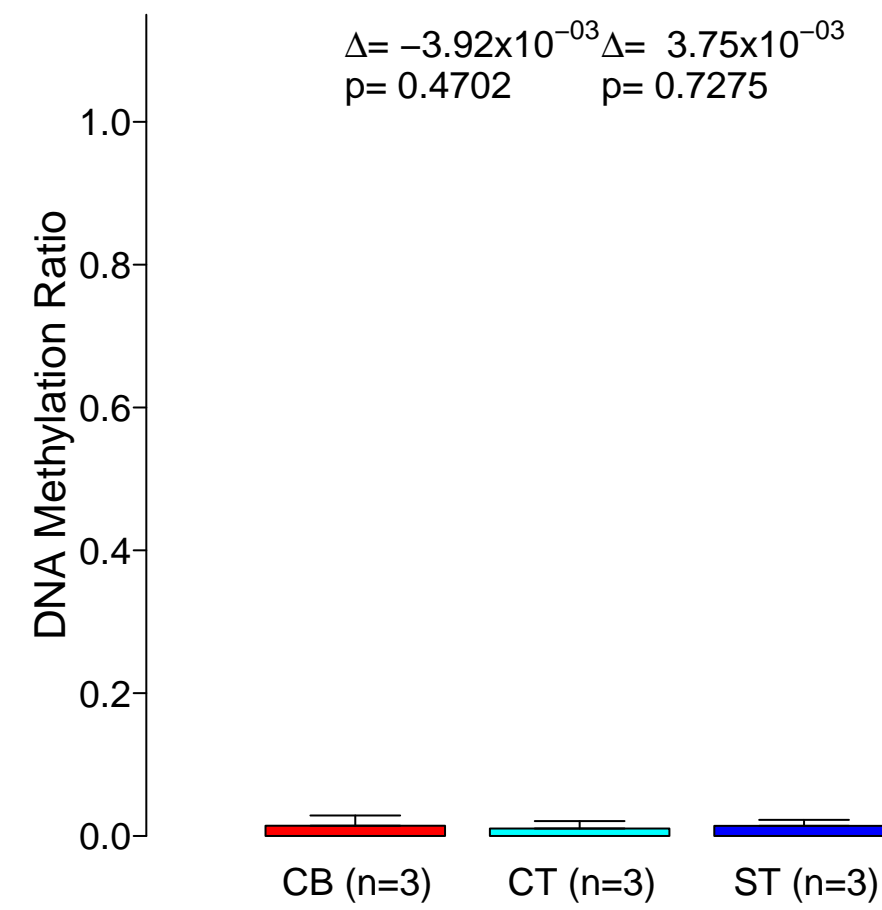

*BCL6* Chr3 187,457,640

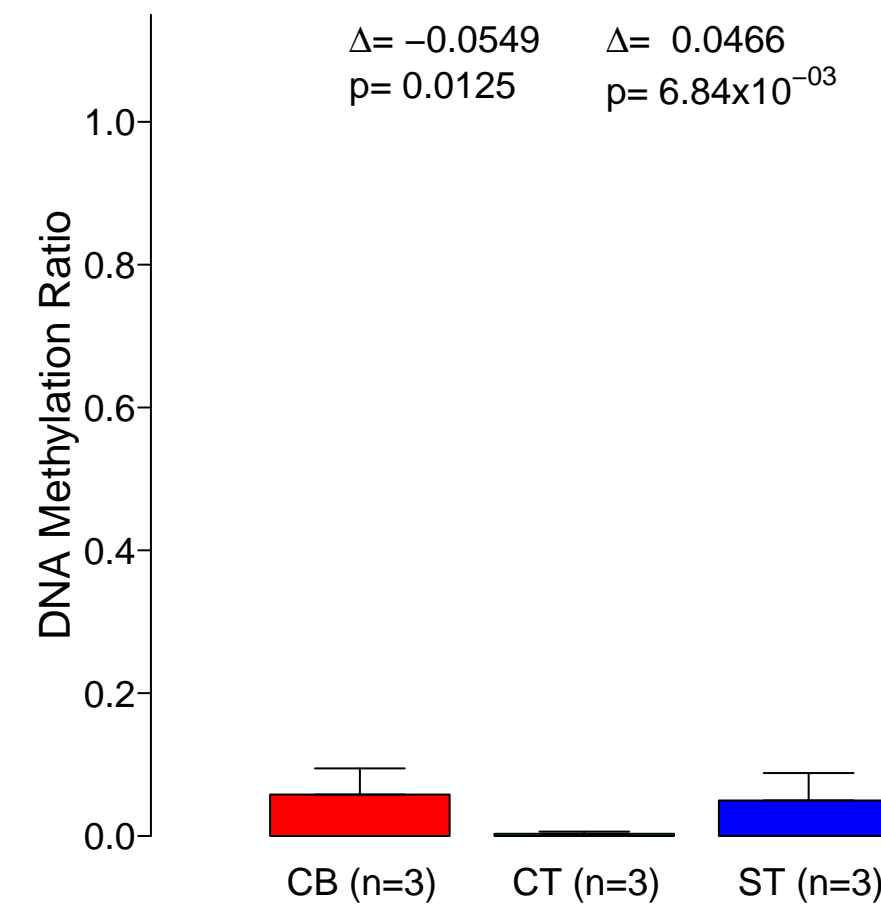

*BCL6* Chr3 187,457,675

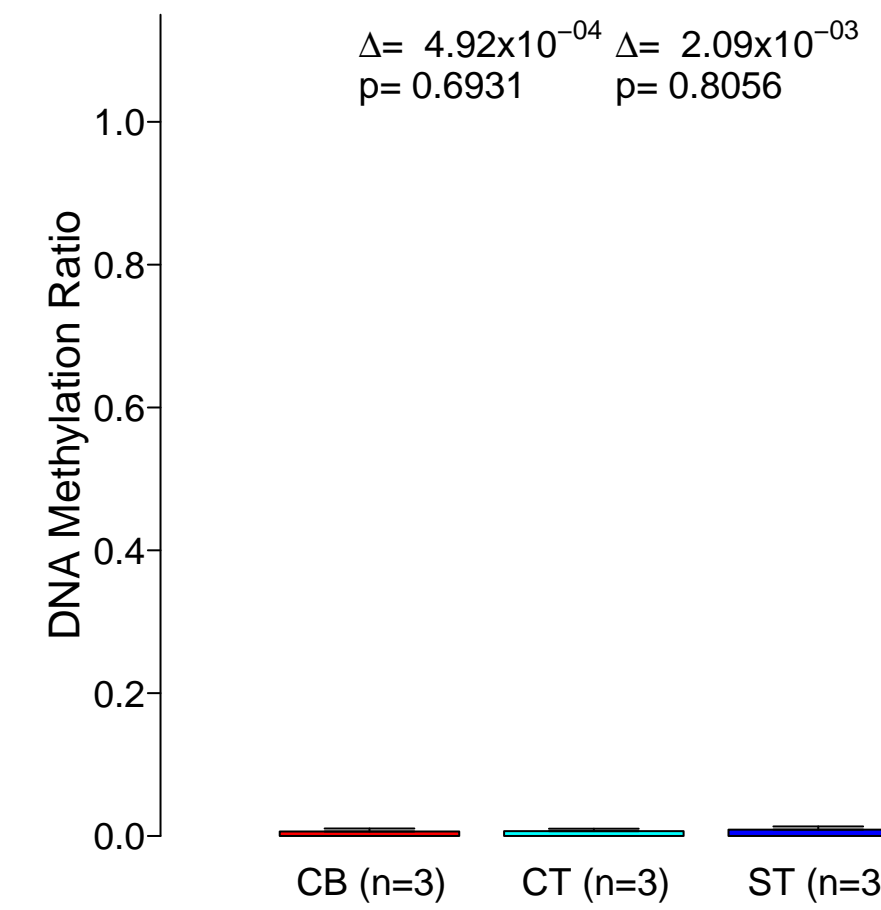

*BCL6* Chr3 187,458,033

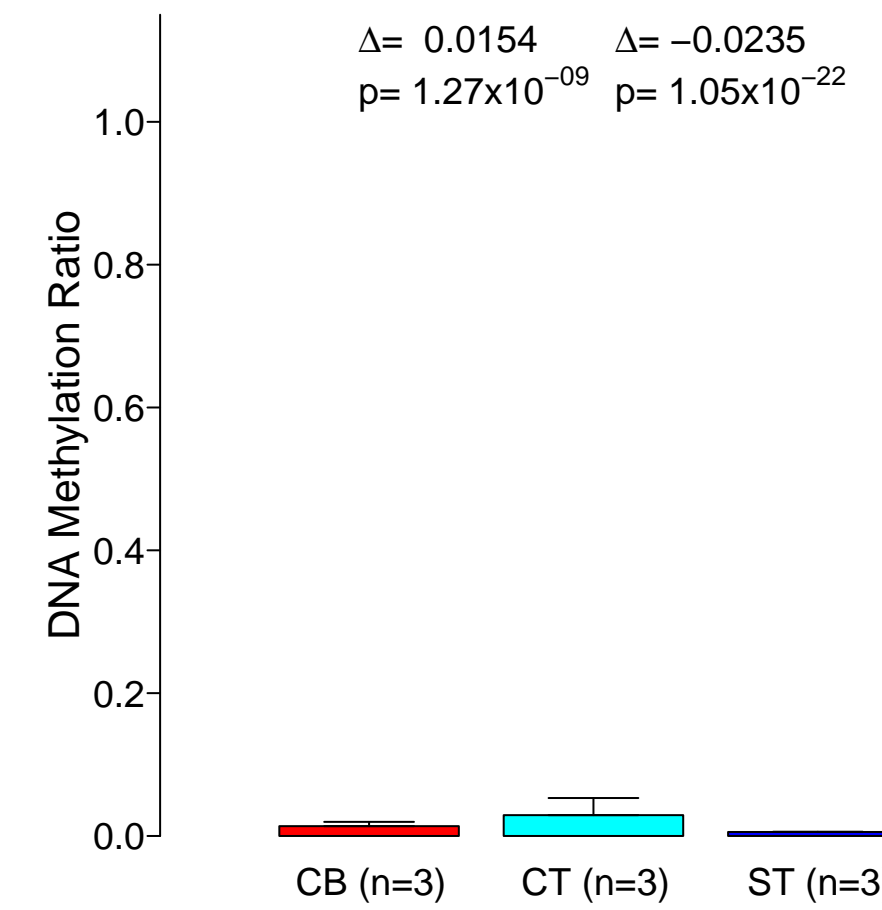

*BCL6* Chr3 187,458,041

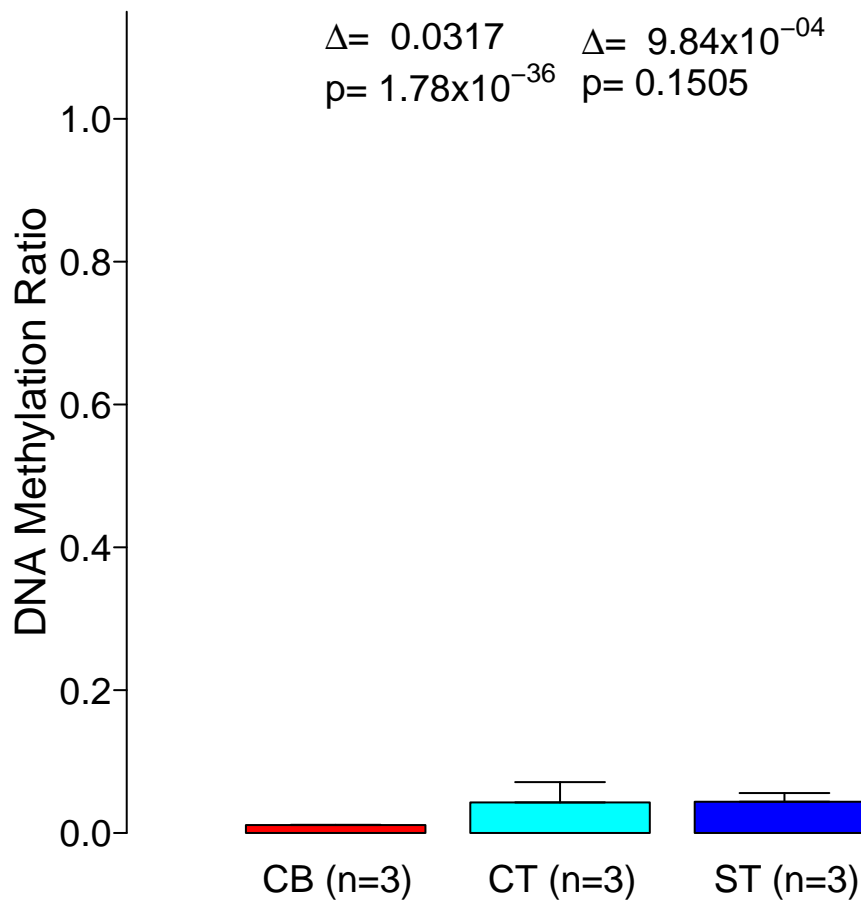

*BCL6* Chr3 187,458,083

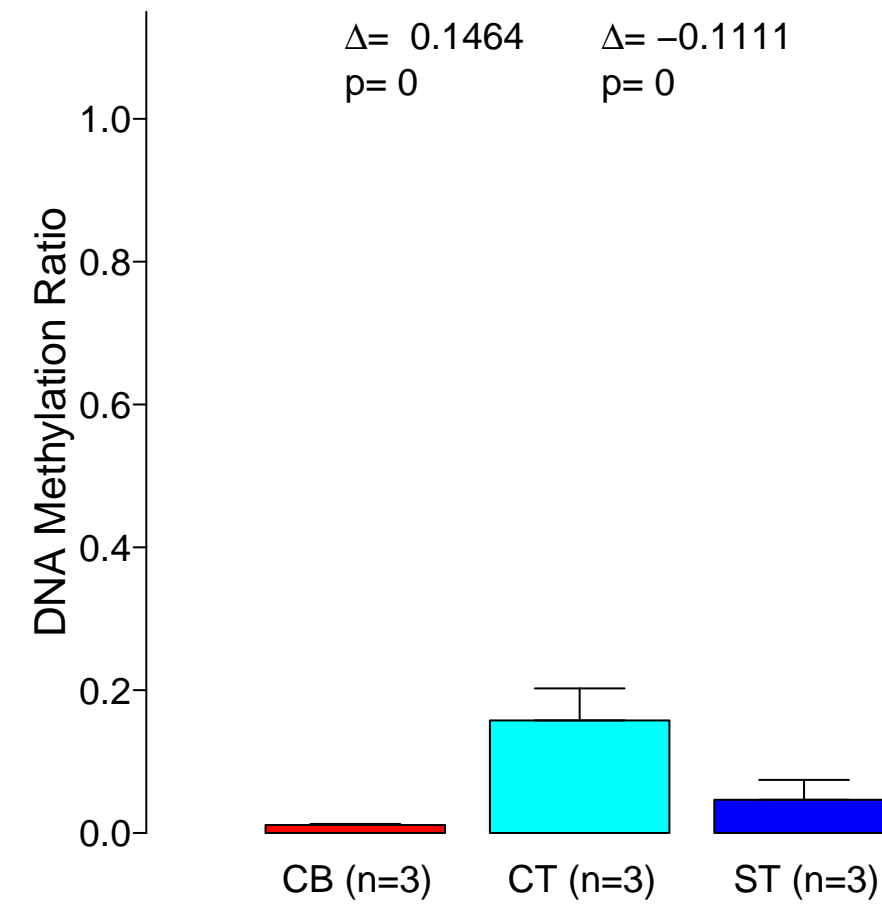

*BCL6* Chr3 187,458,095

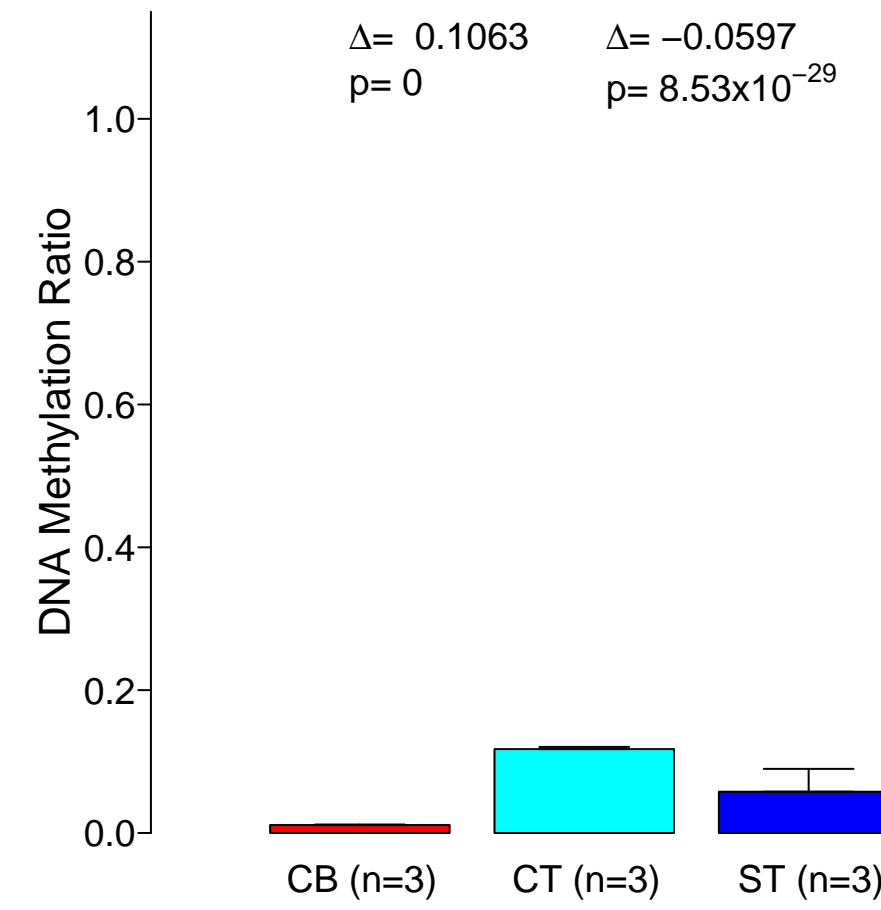

*BCL6* Chr3 187,458,102

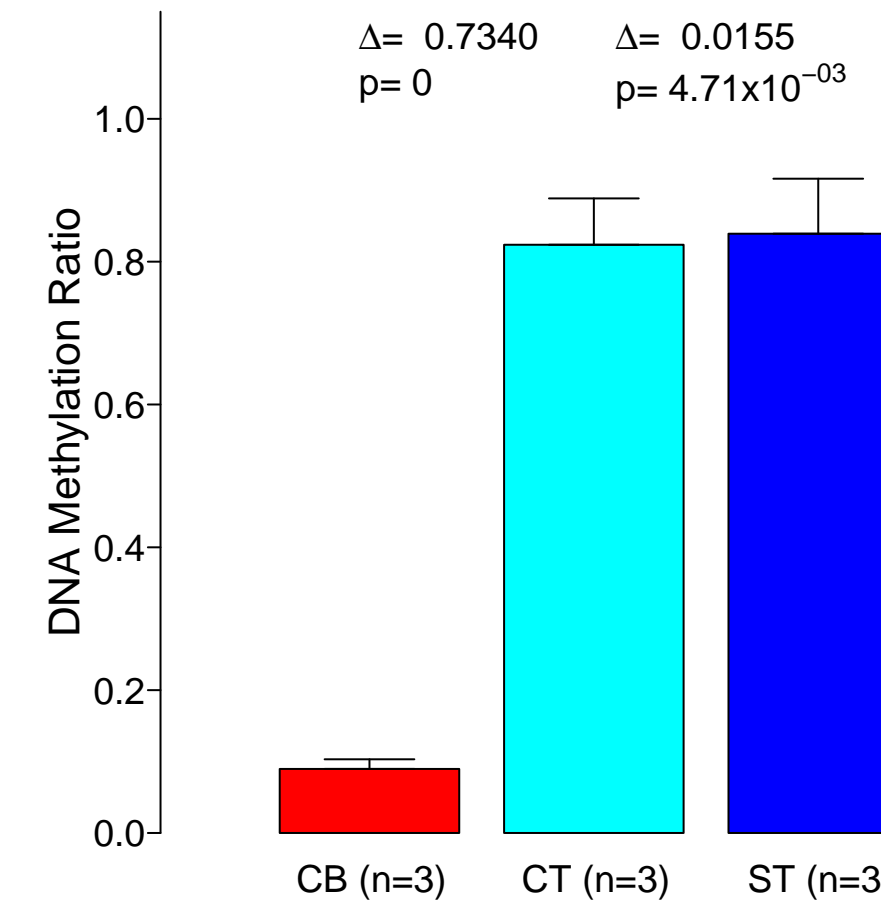

*BCL6* Chr3 187,458,146

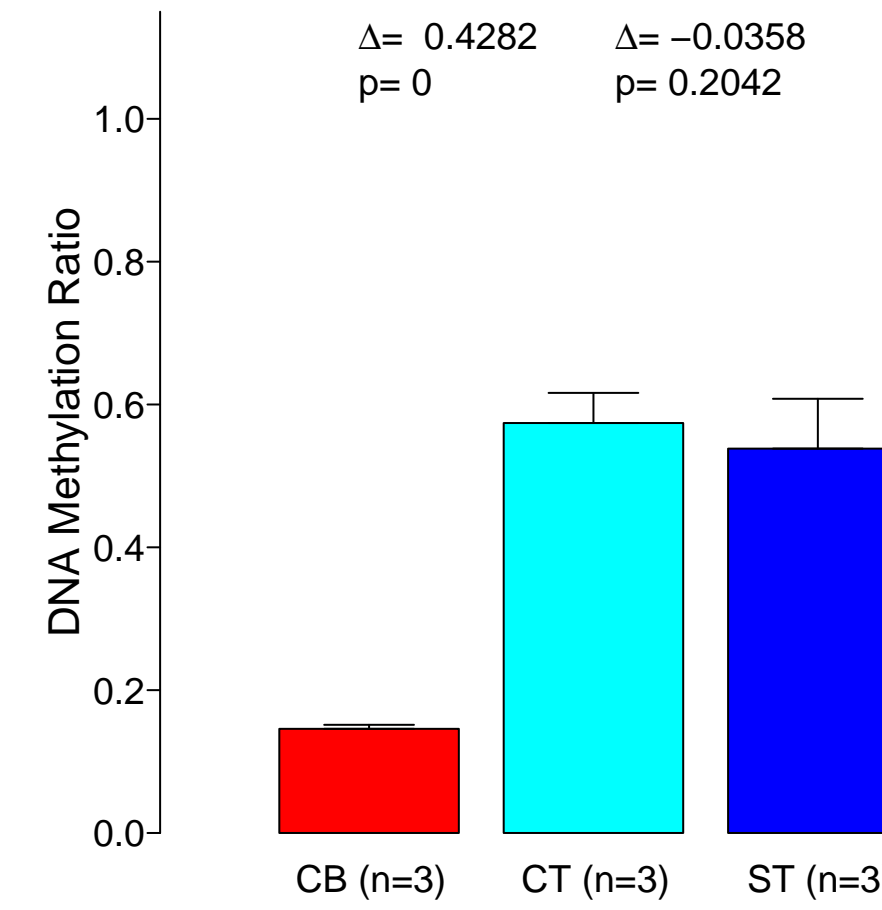

*BCL6* Chr3 187,458,156

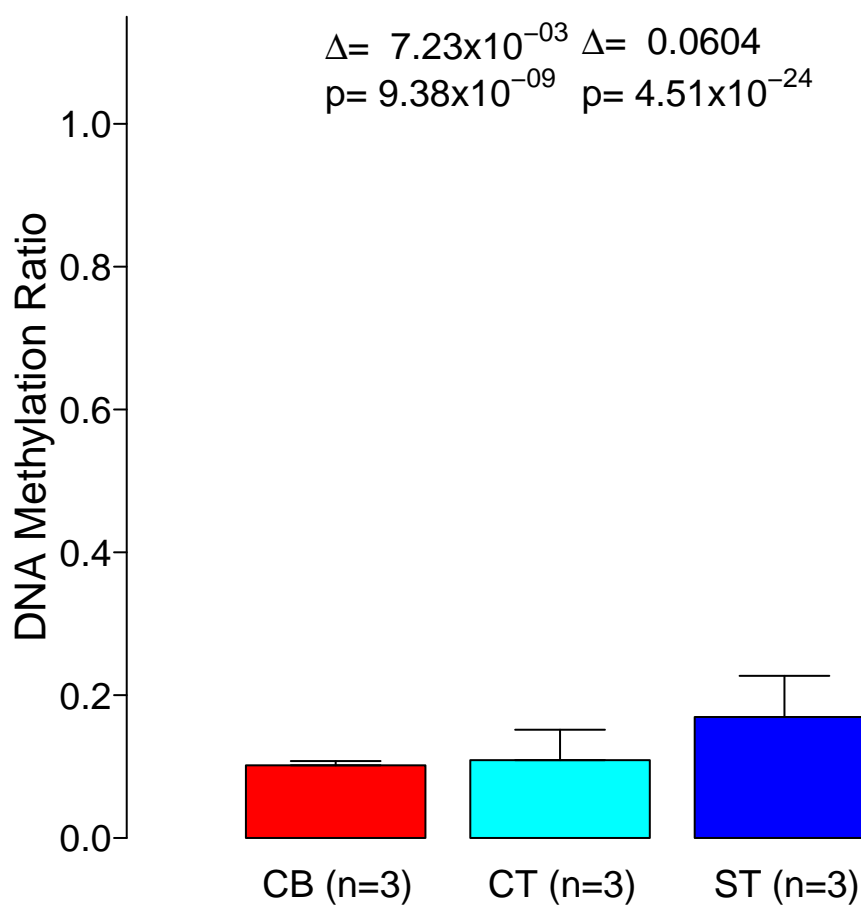

*BCL6* Chr3 187,458,163

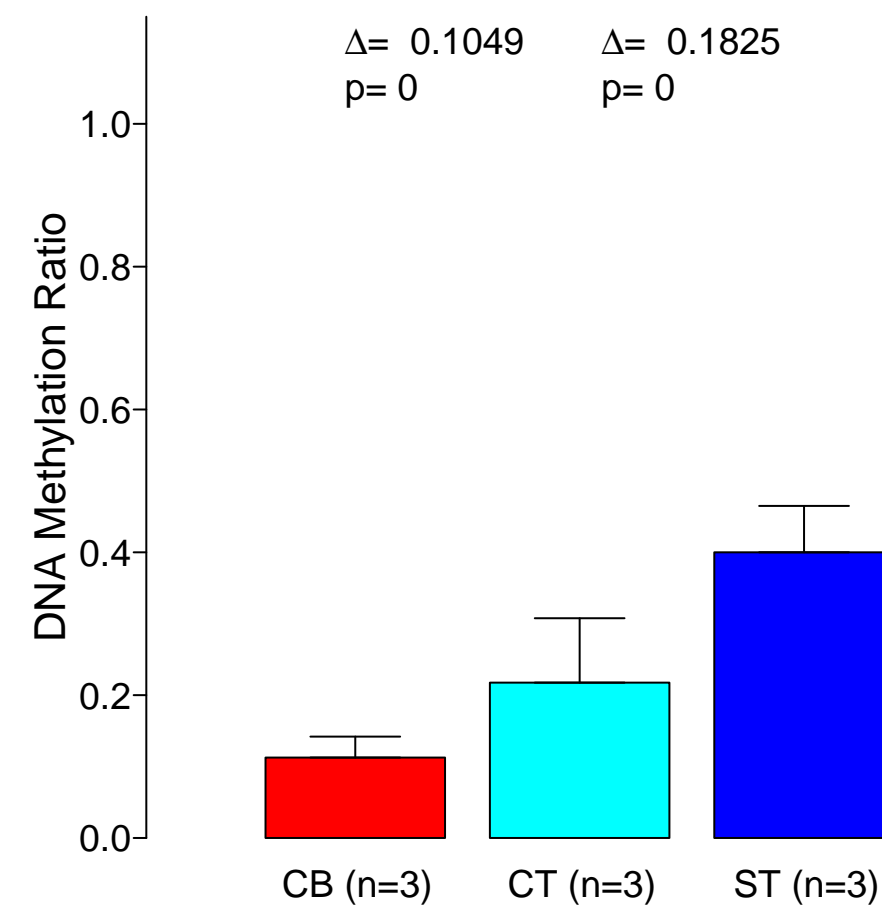

*BCL6* Chr3 187,458,198

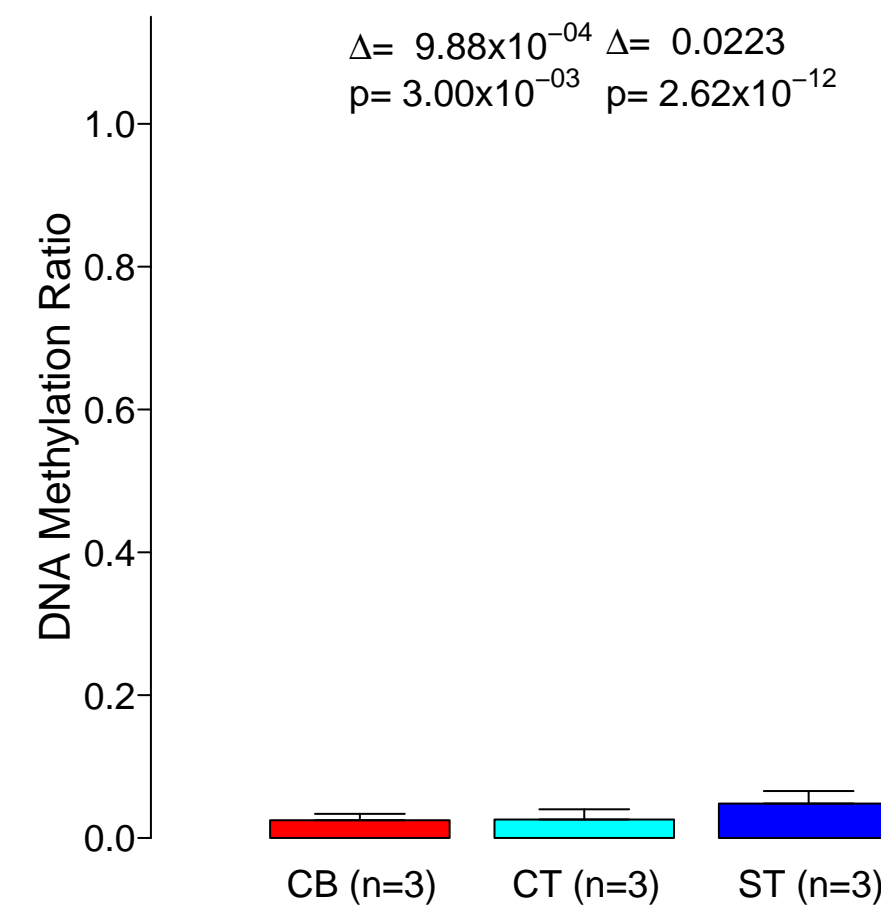

*BCL6* Chr3 187,458,209

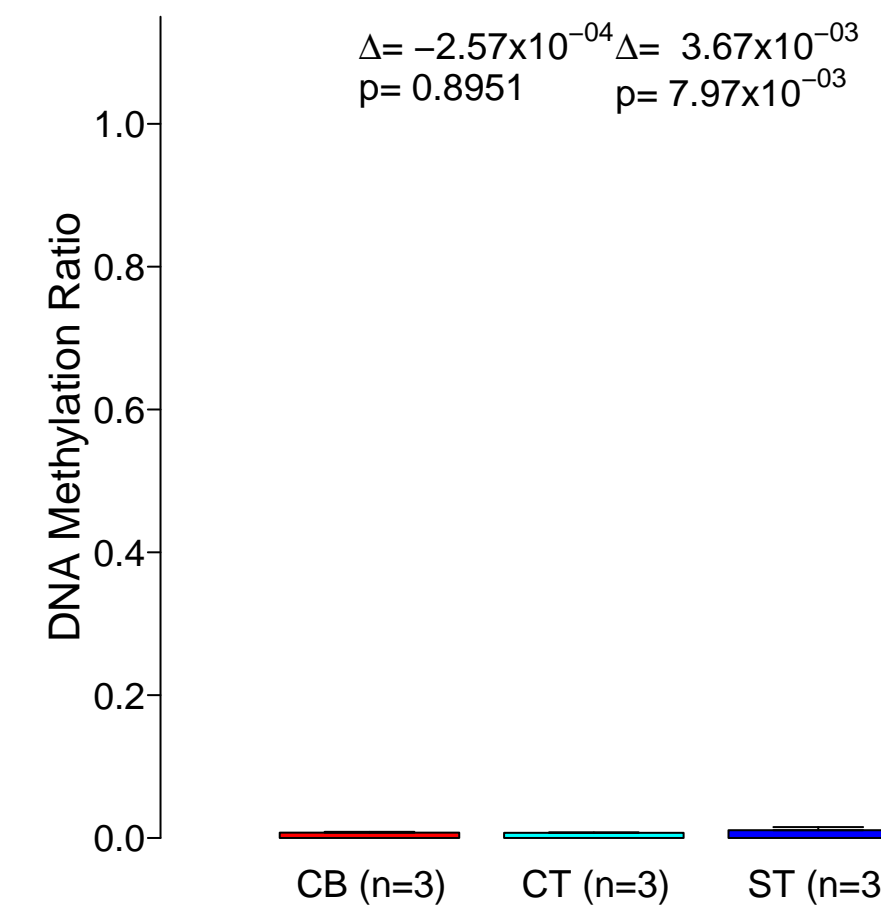

*BCL6* Chr3 187,458,264

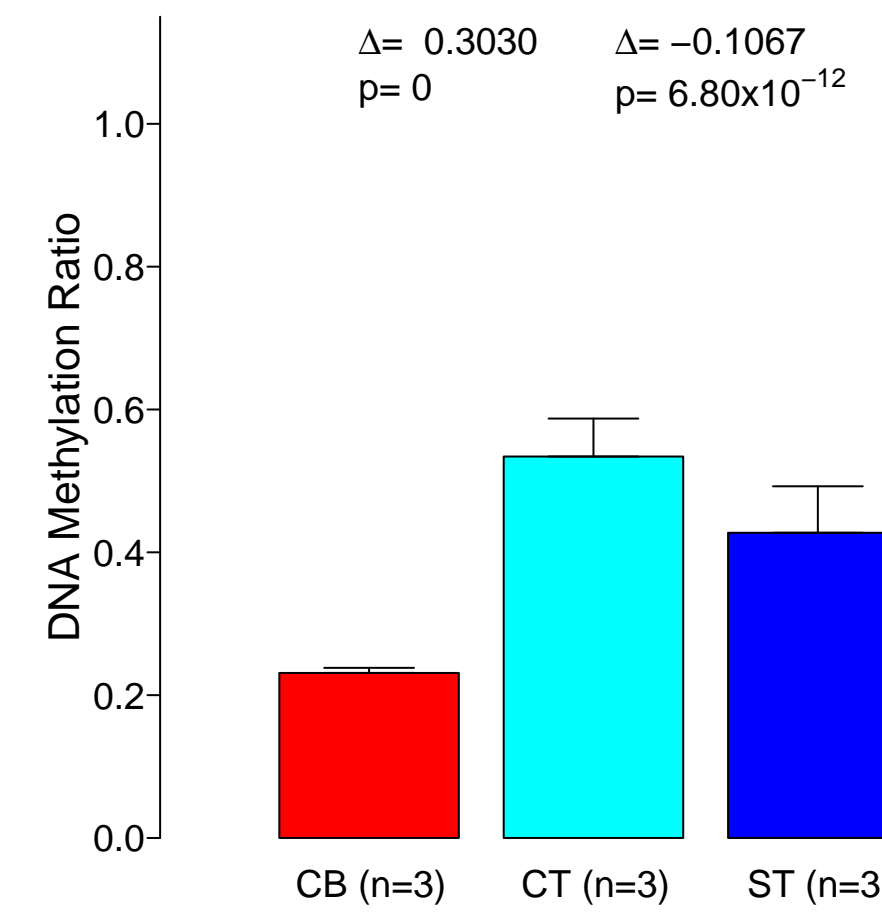



*BCL6* Chr3 187,458,327

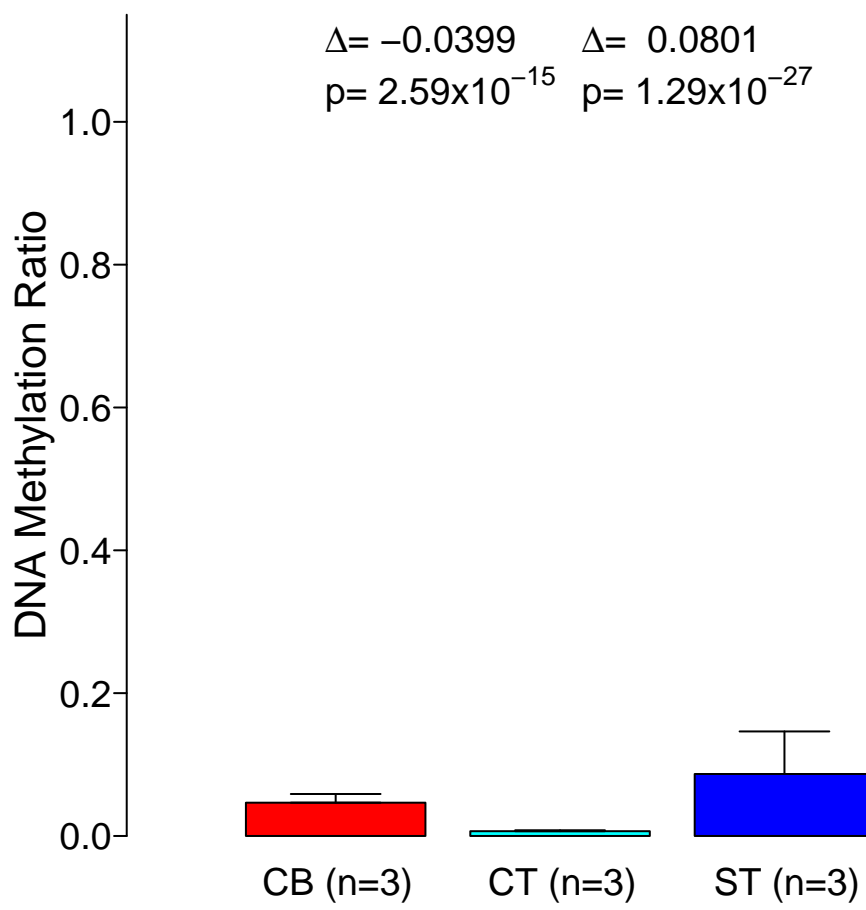

*BCL6* Chr3 187,458,369

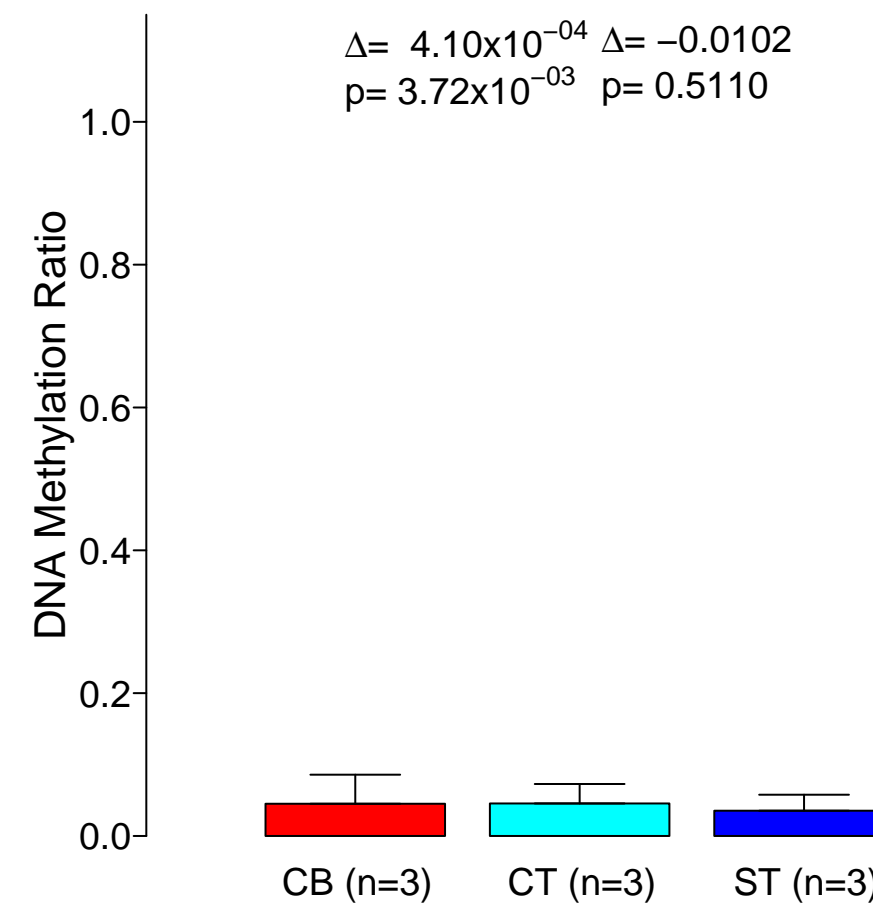

*BCL6* Chr3 187,458,458

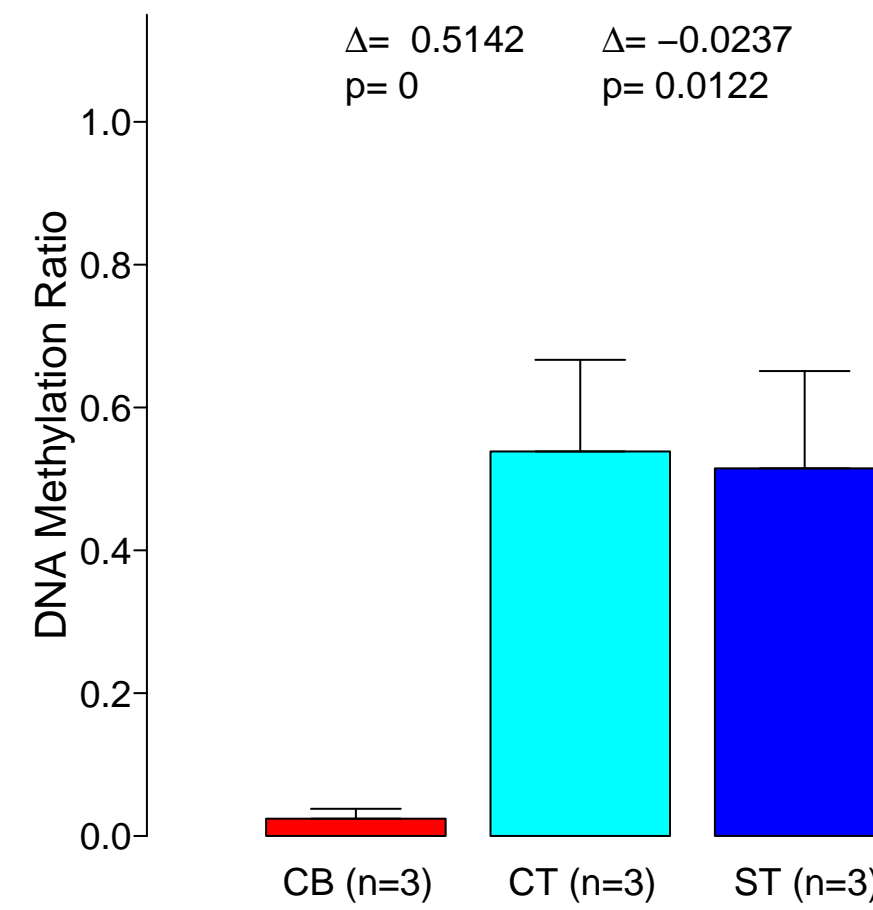

*BCL6* Chr3 187,458,461

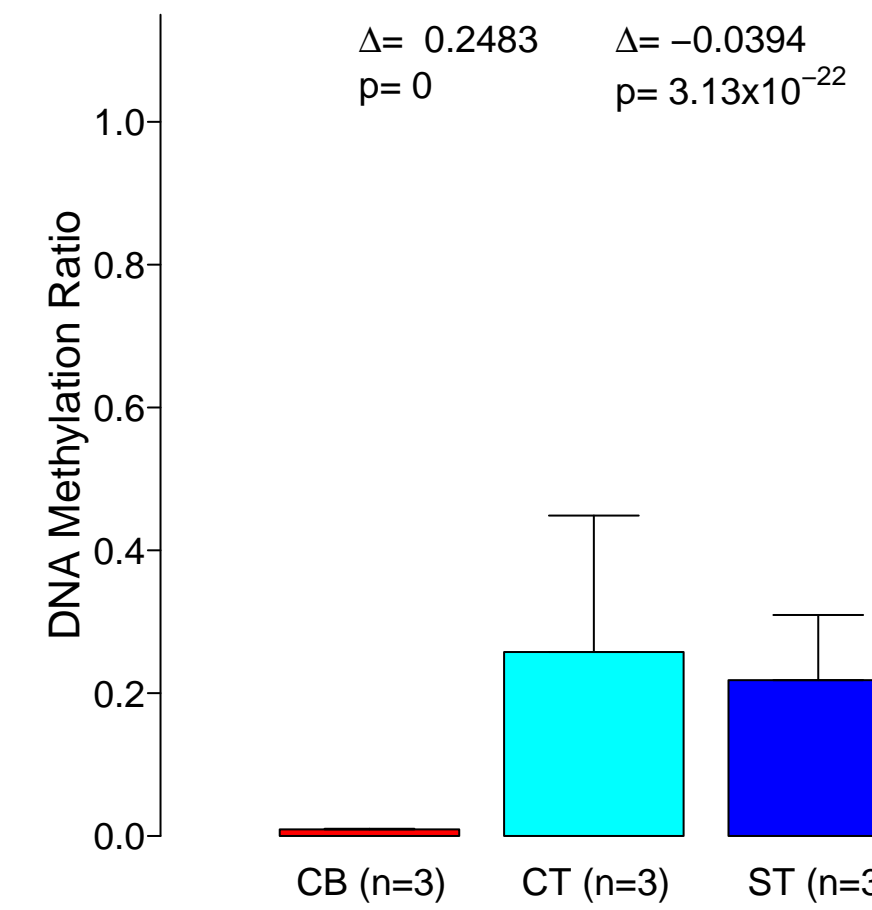

*BCL6* Chr3 187,458,496

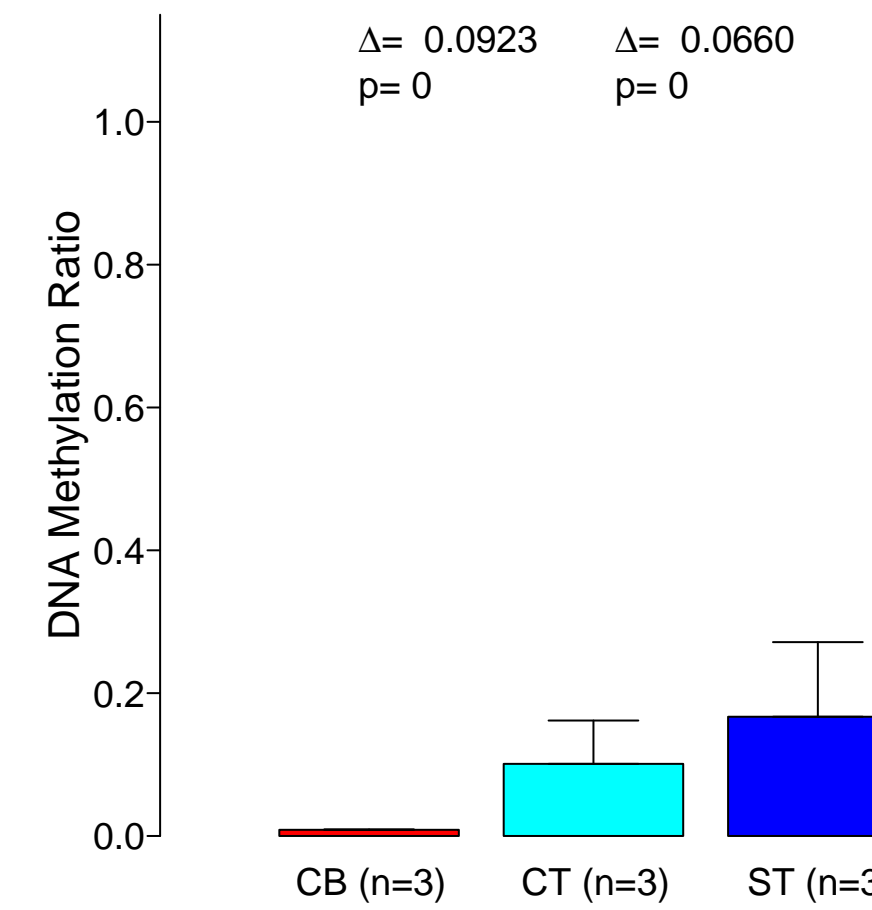

*BCL6* Chr3 187,458,539

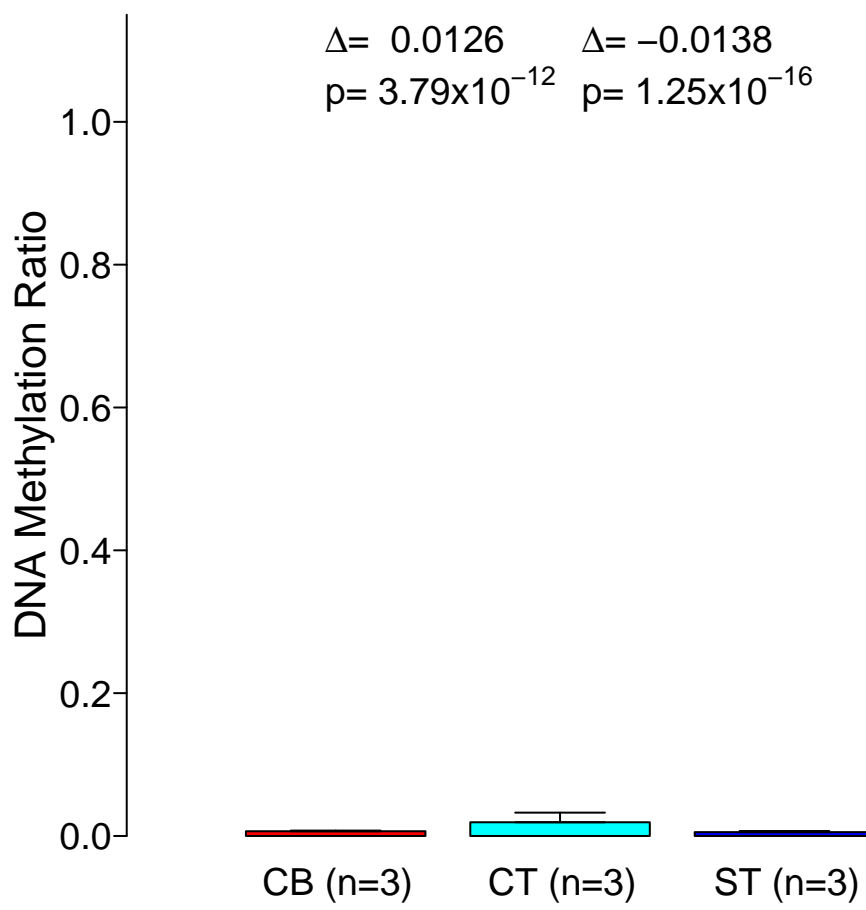

*BCL6* Chr3 187,458,584

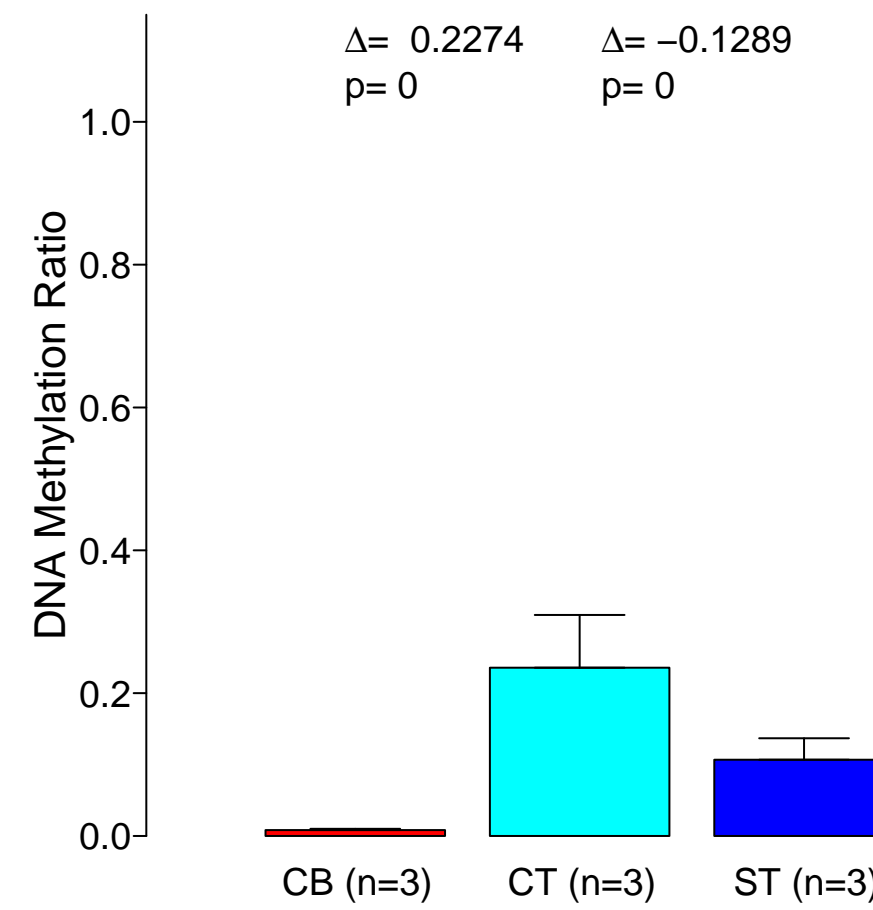

*BCL6* Chr3 187,458,589

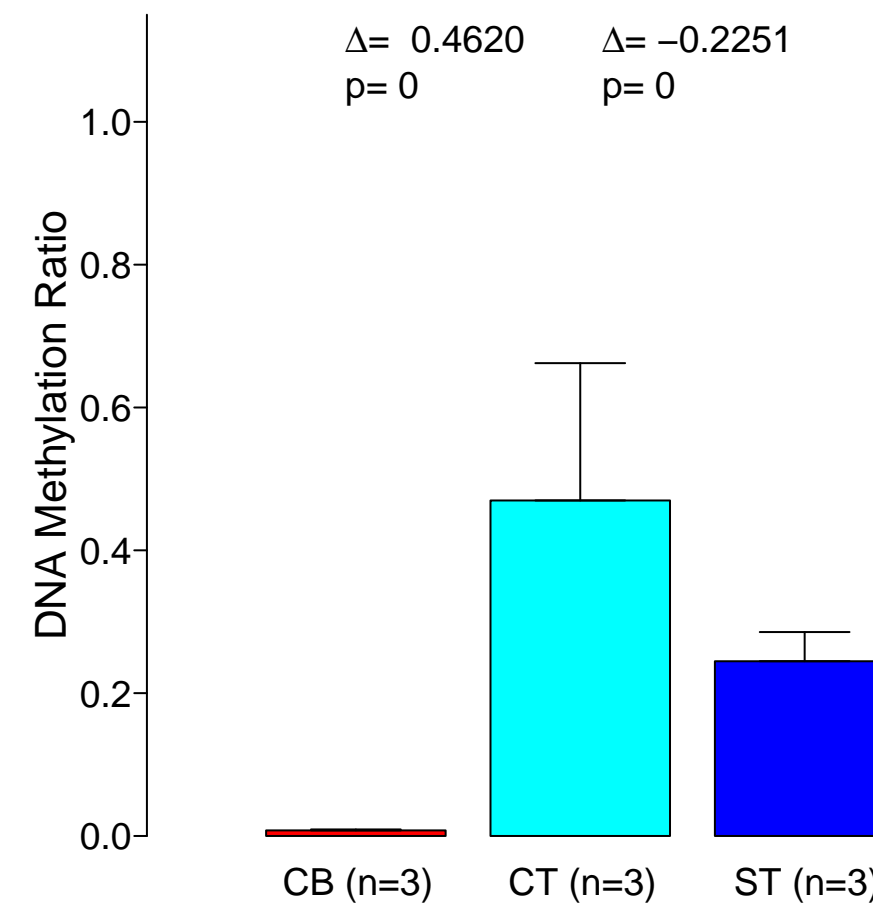

*BCL6* Chr3 187,458,630

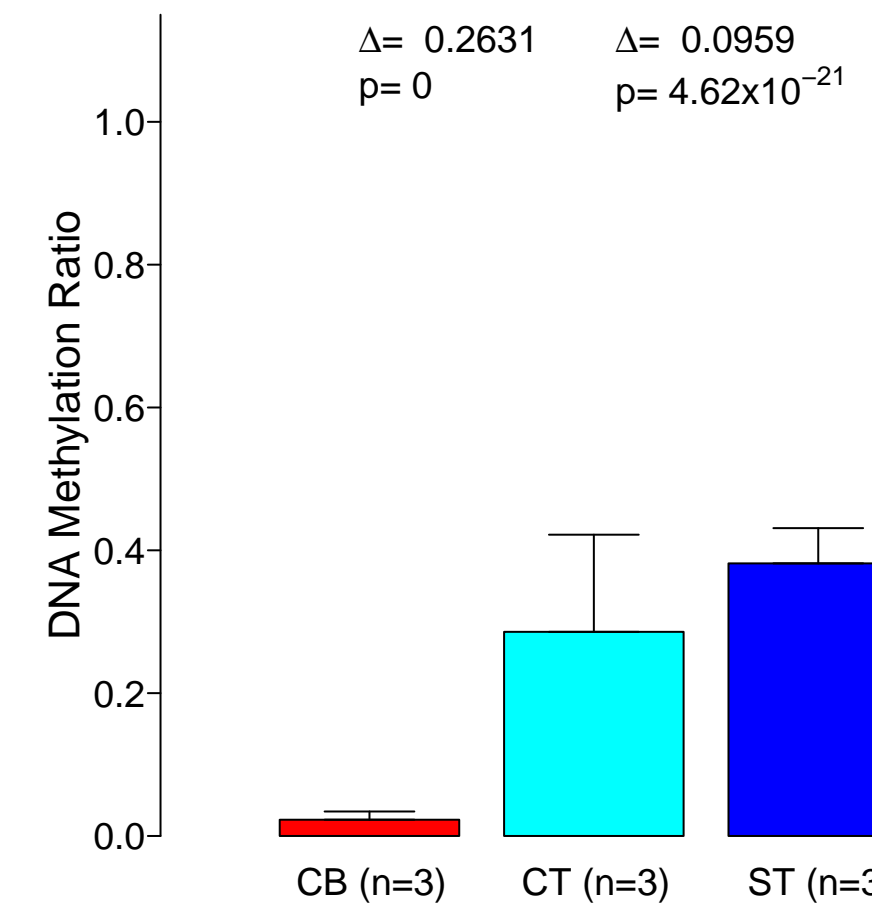

*BCL6* Chr3 187,458,651

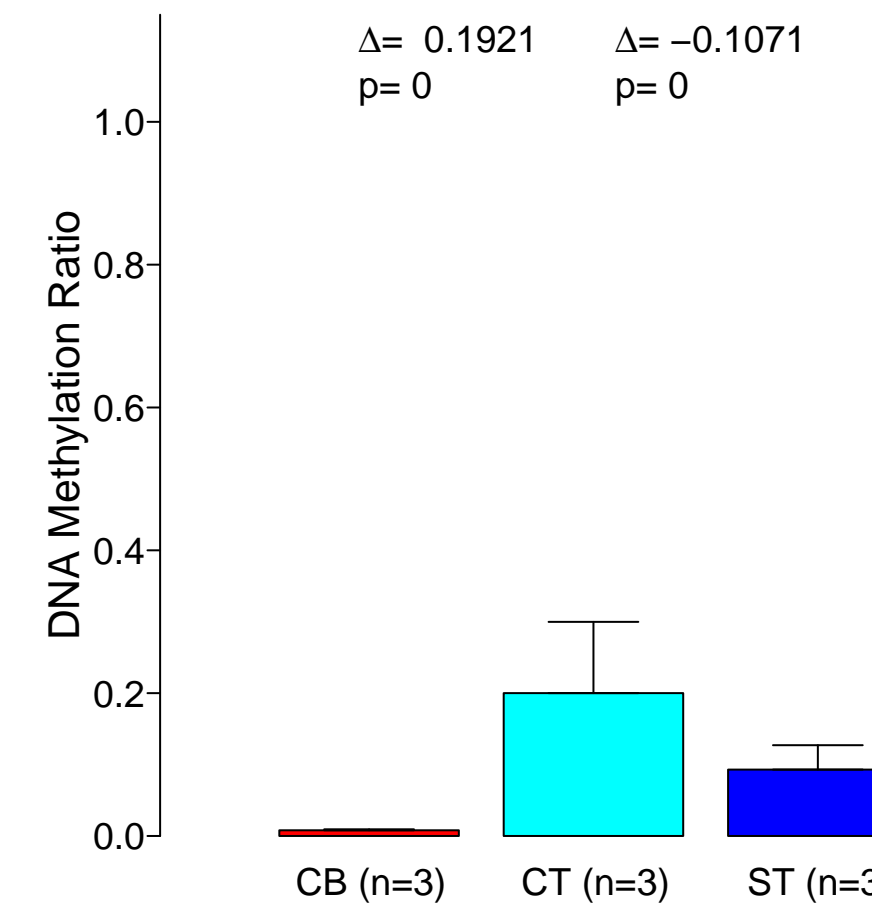

*BCL6* Chr3 187,458,758

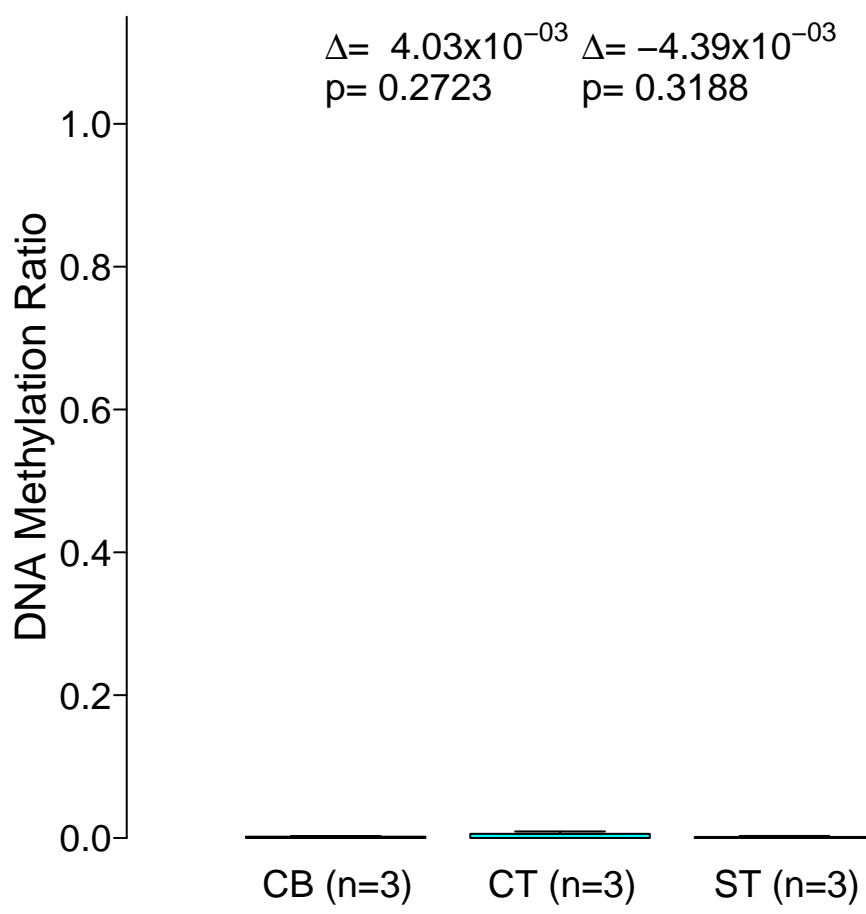

*BCL6* Chr3 187,458,761

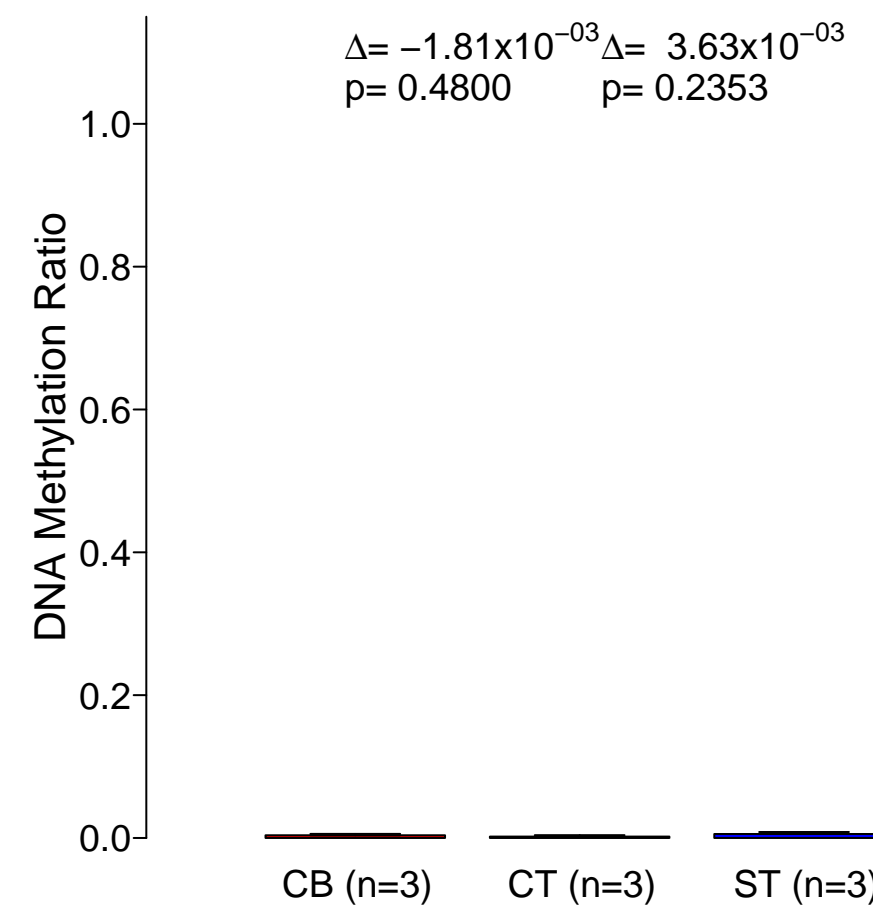

*BCL6* Chr3 187,458,765

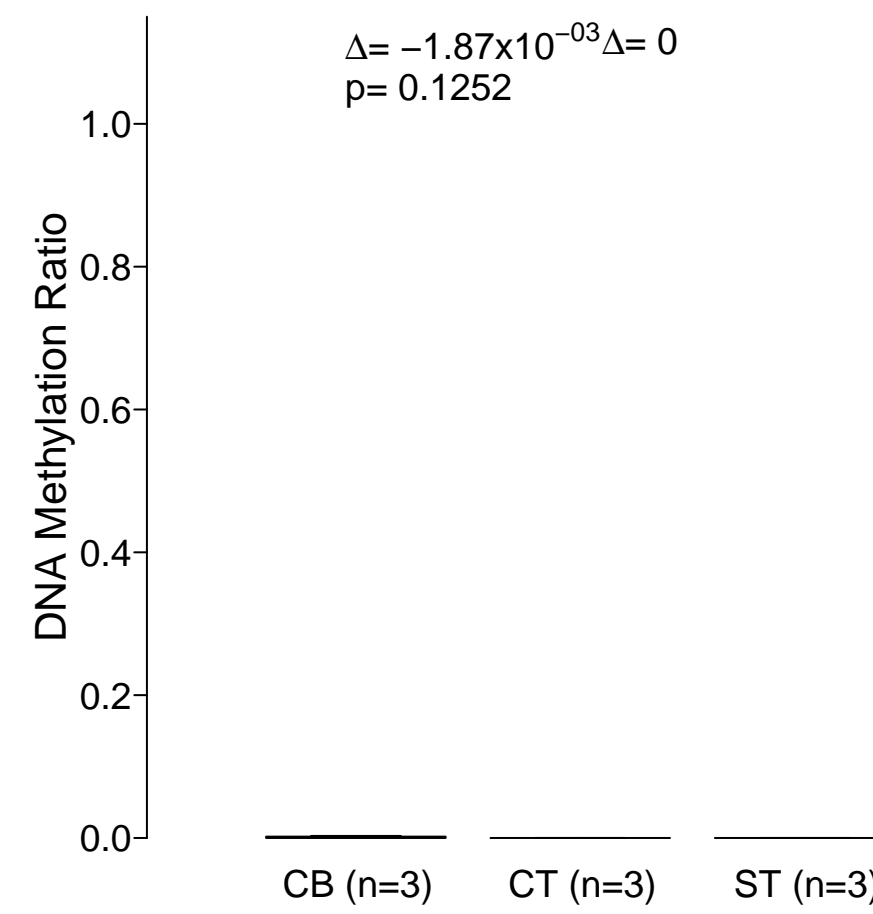

*BCL6* Chr3 187,458,777

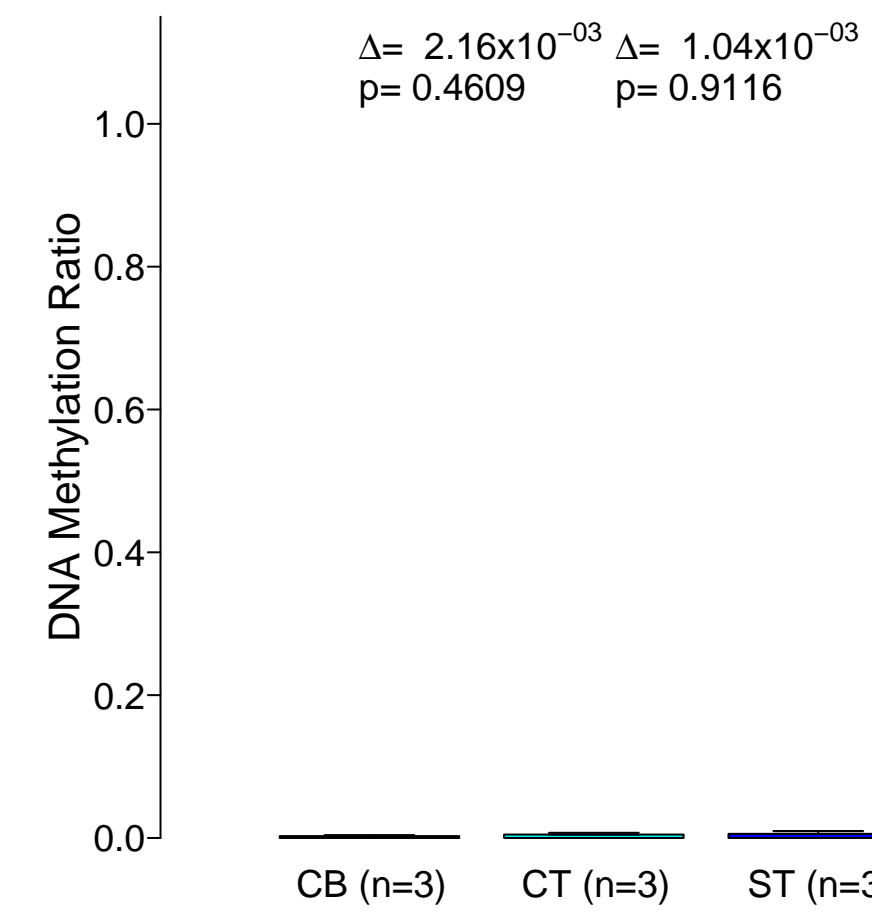

*BCL6* Chr3 187,458,780

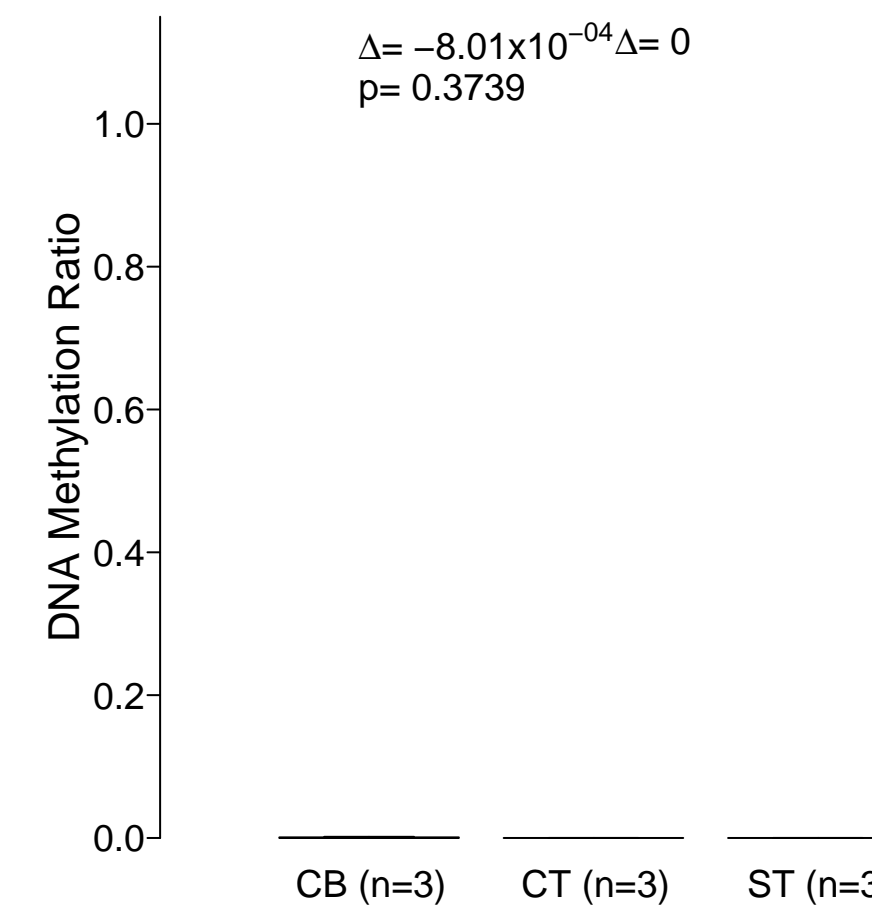

*BCL6* Chr3 187,458,789

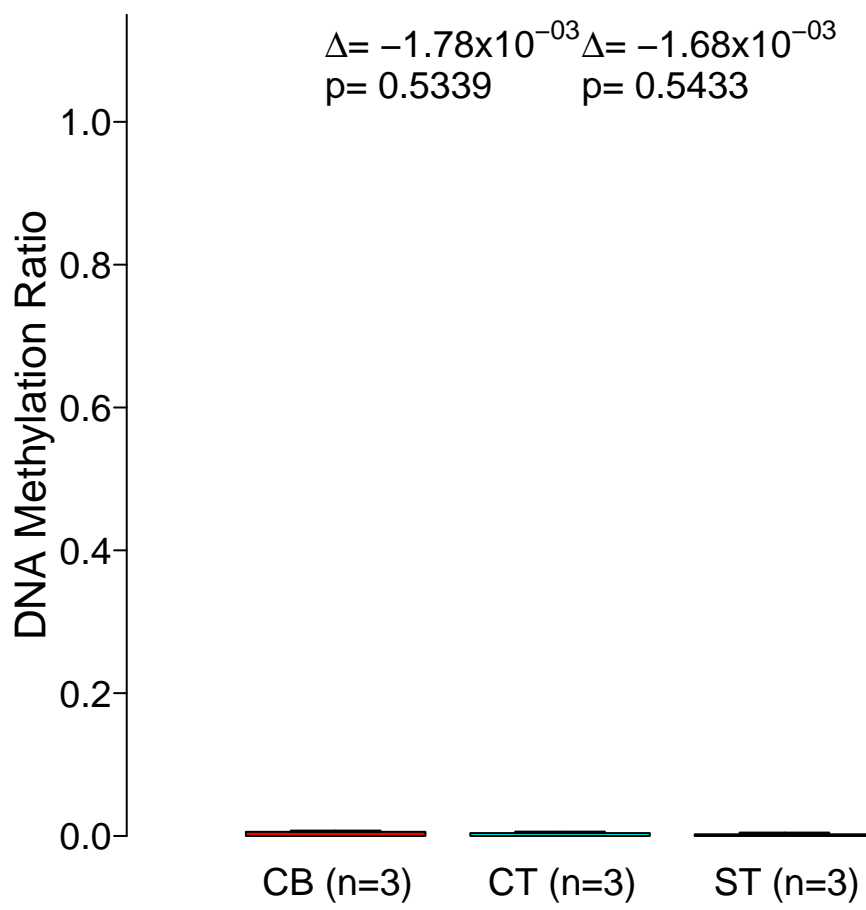

*BCL6* Chr3 187,458,799

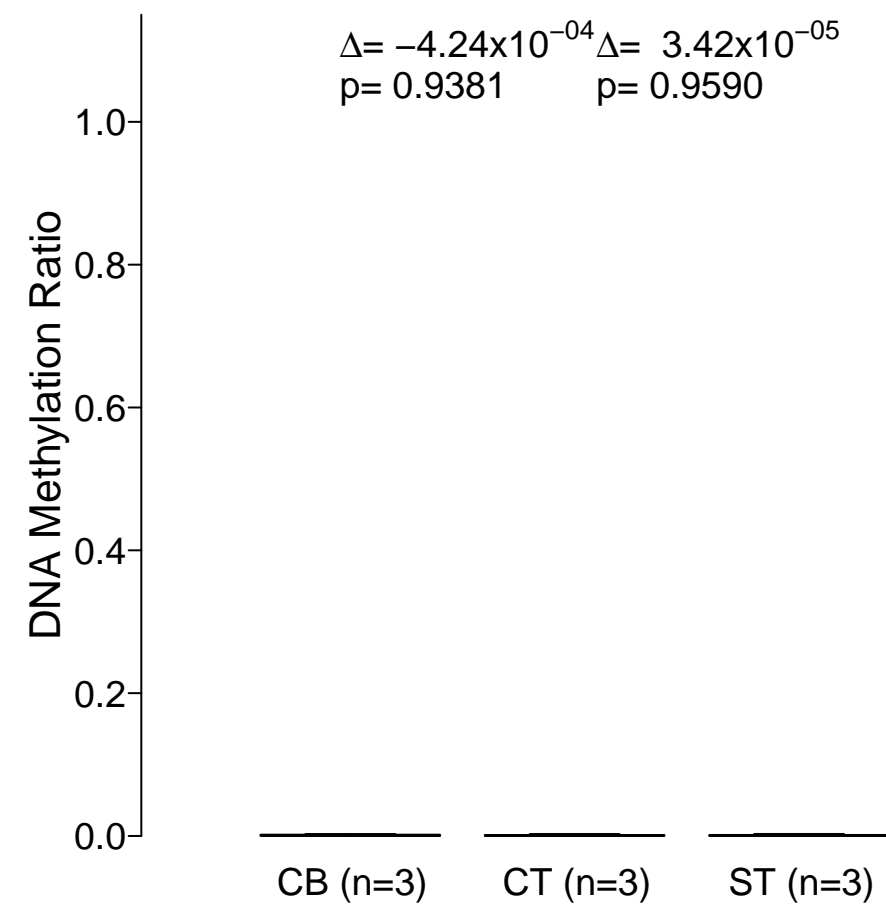

*BCL6* Chr3 187,458,801

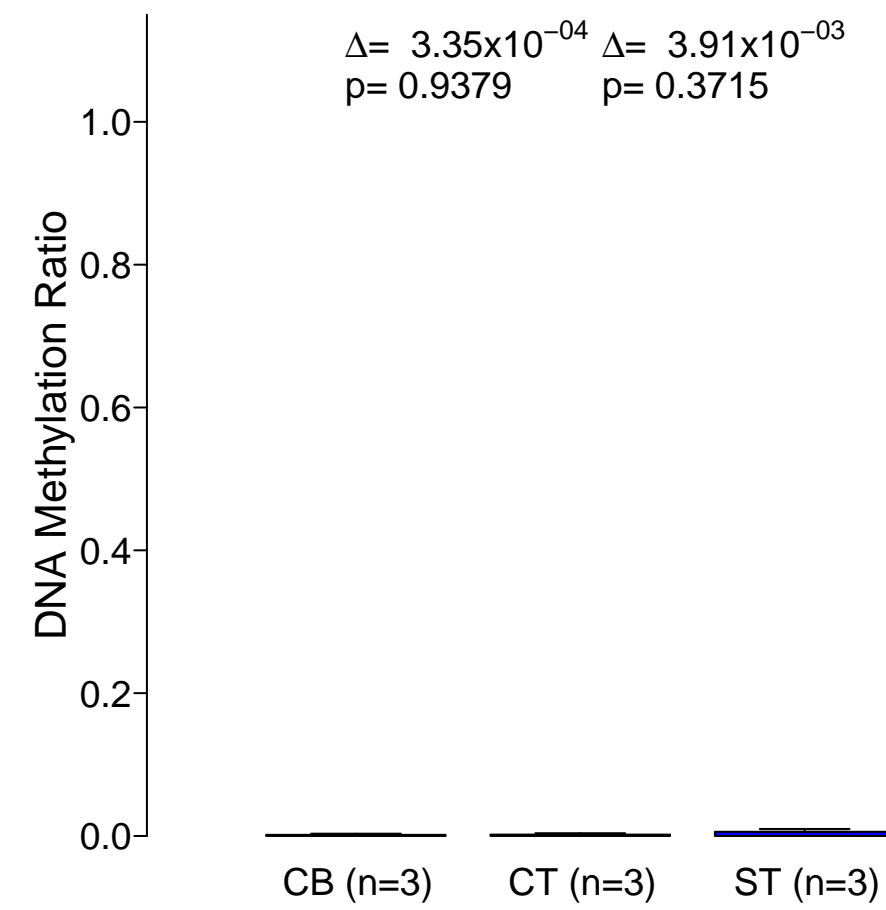

*BCL6* Chr3 187,458,807

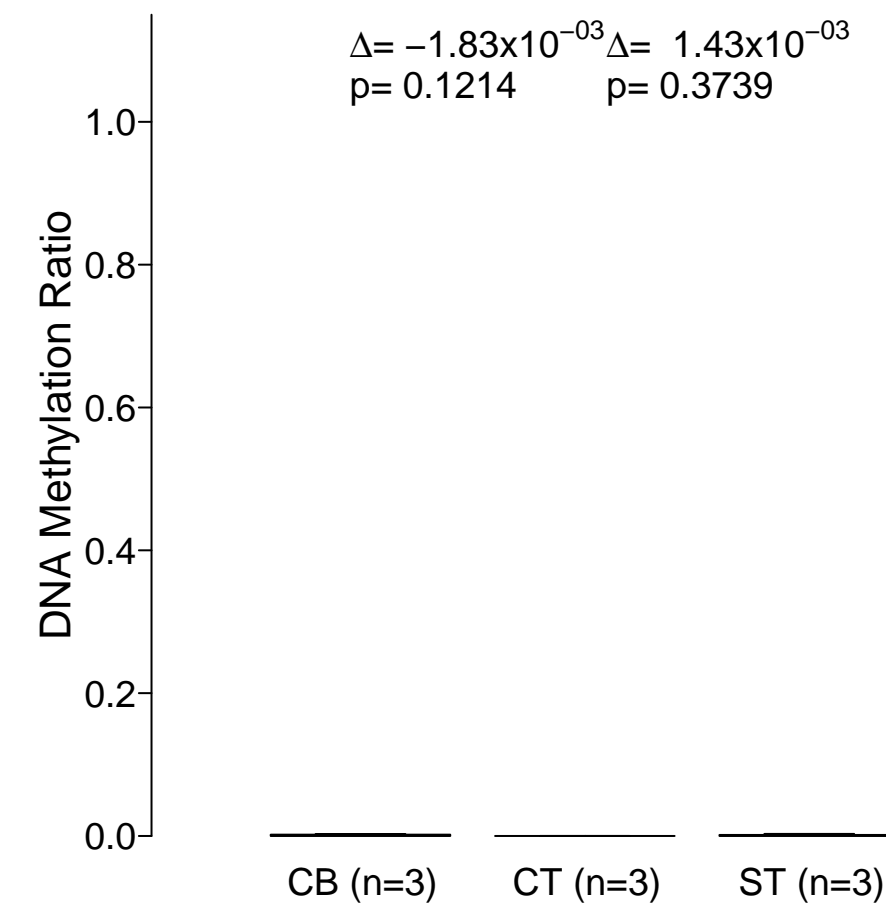

*BCL6* Chr3 187,458,821

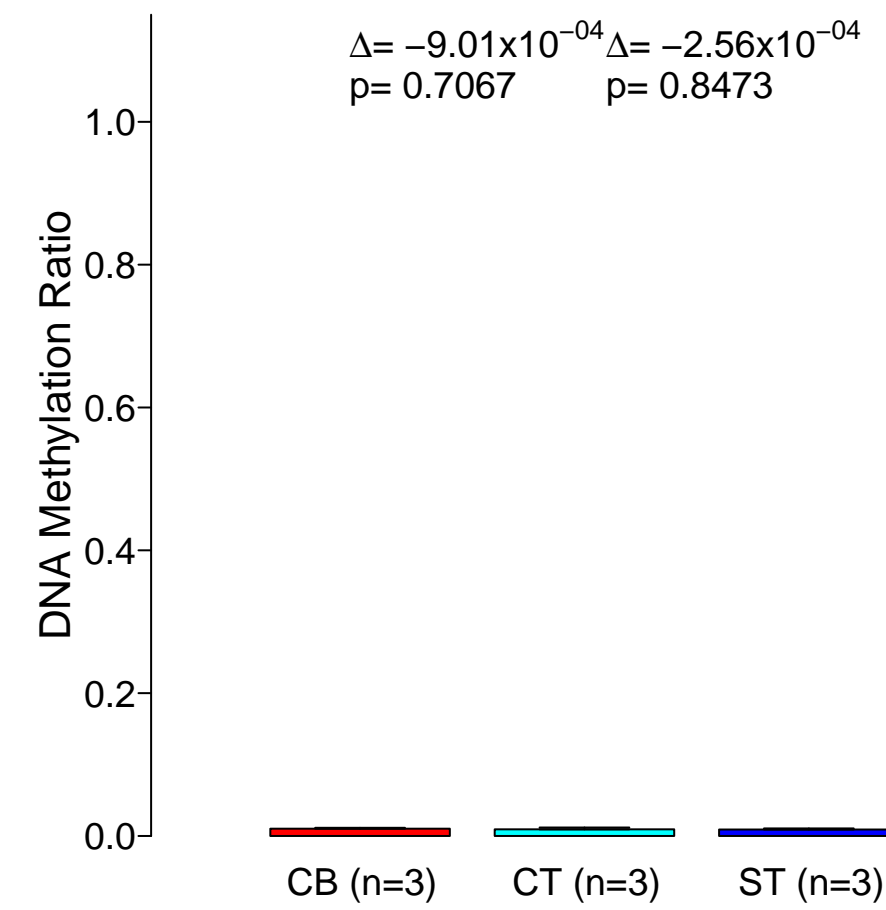

*BCL6* Chr3 187,458,841

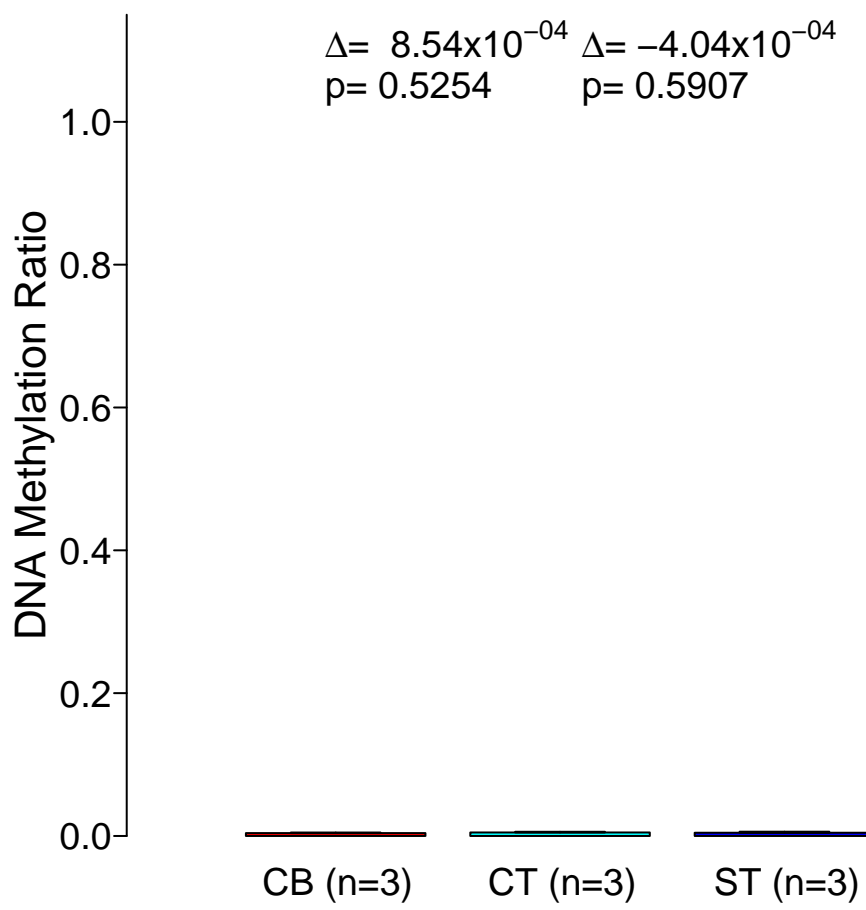

*BCL6* Chr3 187,458,845

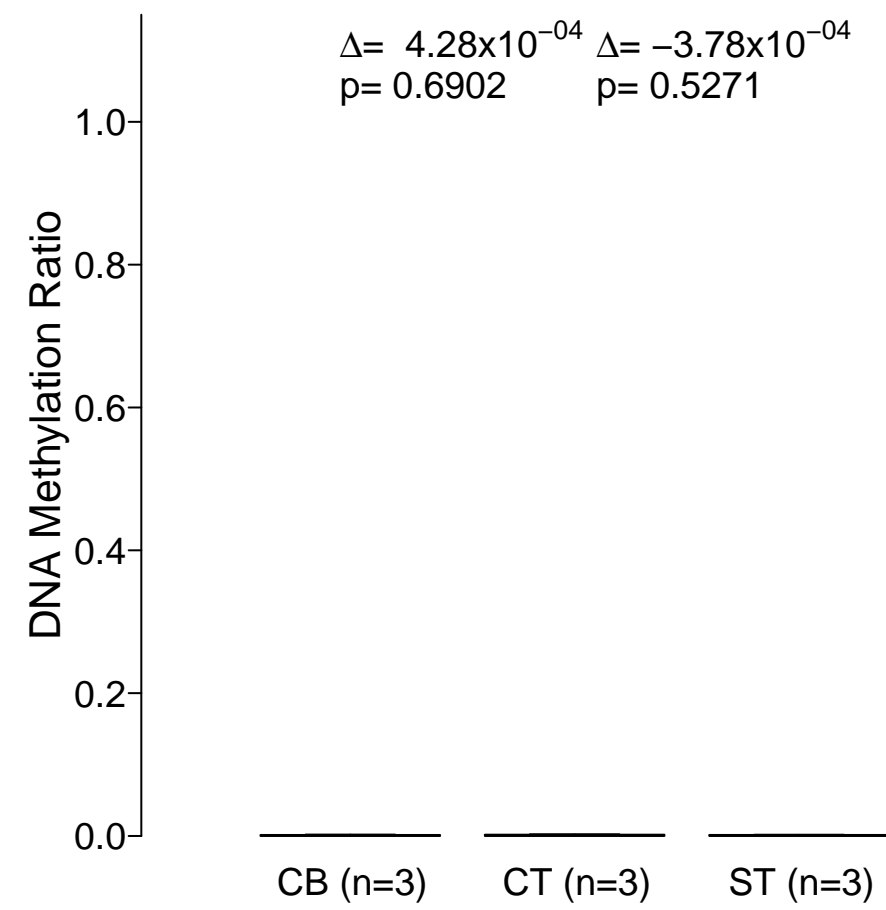

*BCL6* Chr3 187,458,852

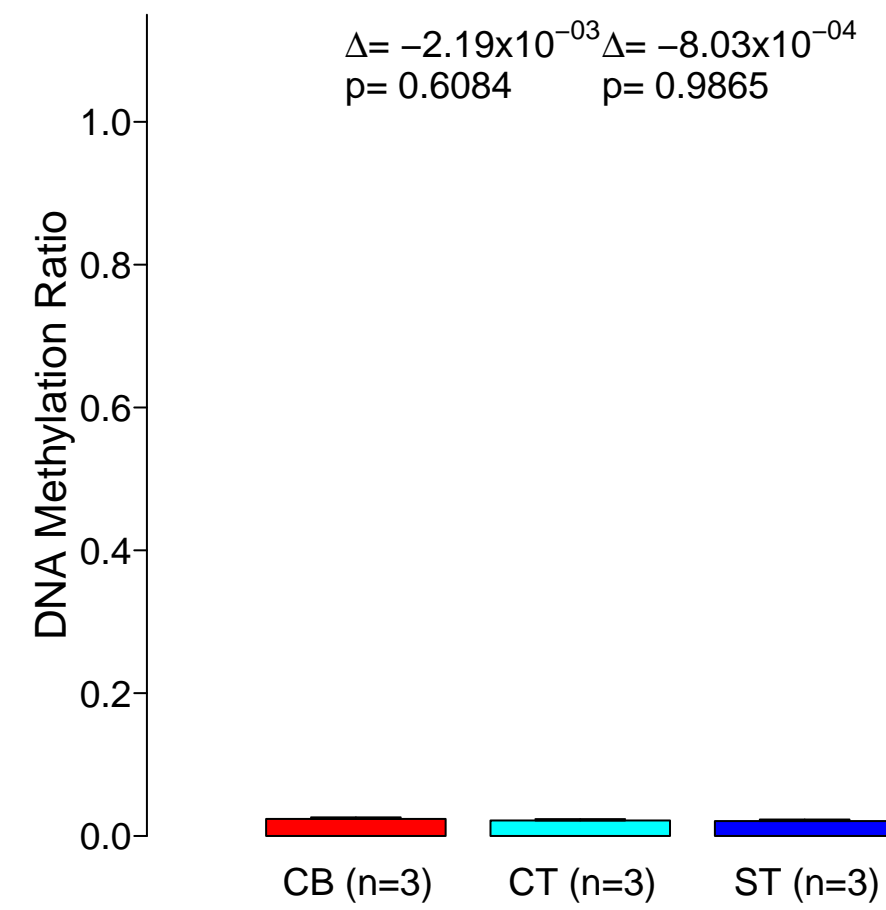

*BCL6* Chr3 187,458,855

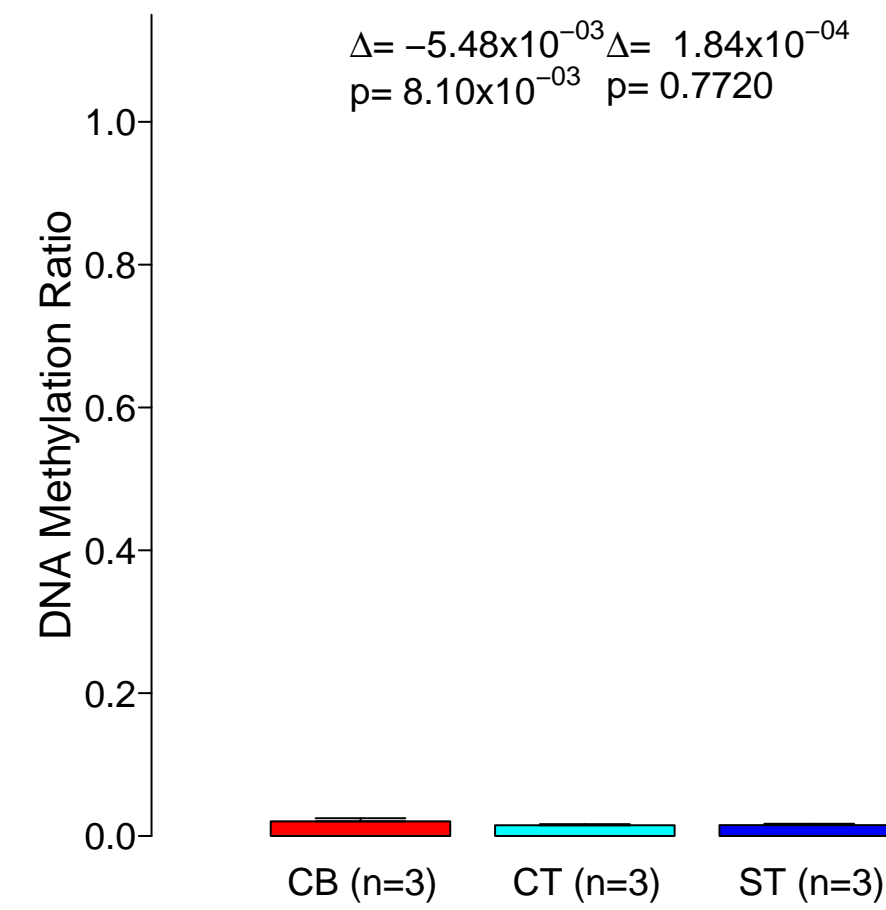

*BCL6* Chr3 187,458,857

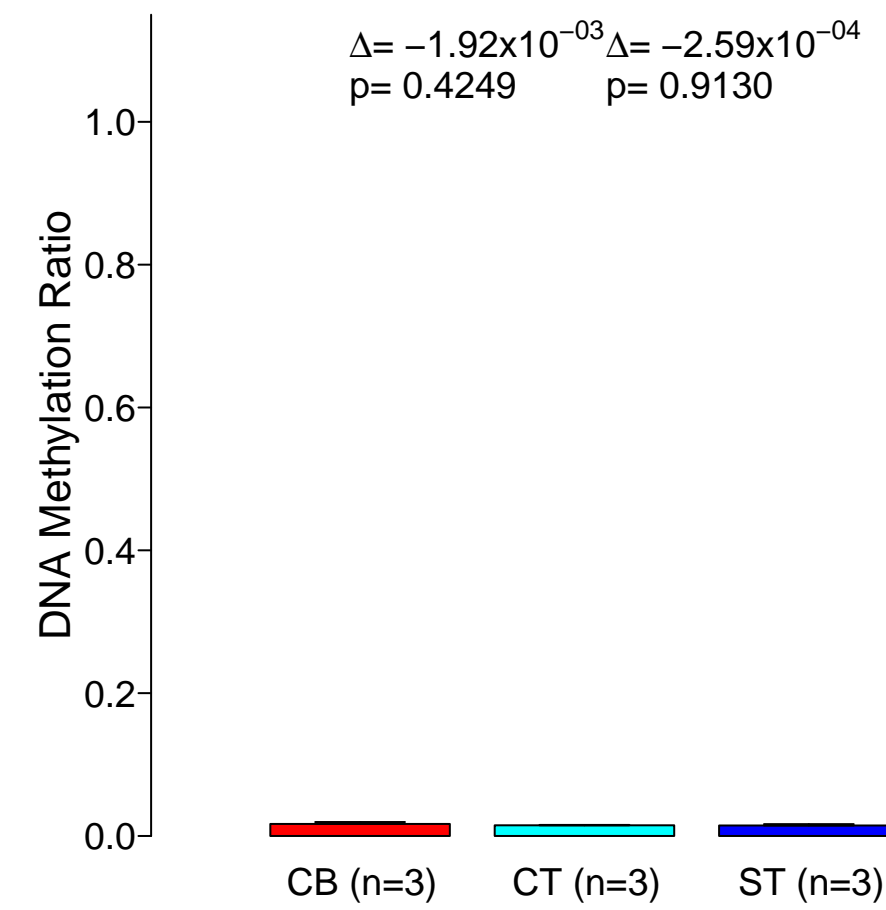

*BCL6* Chr3 187,458,859

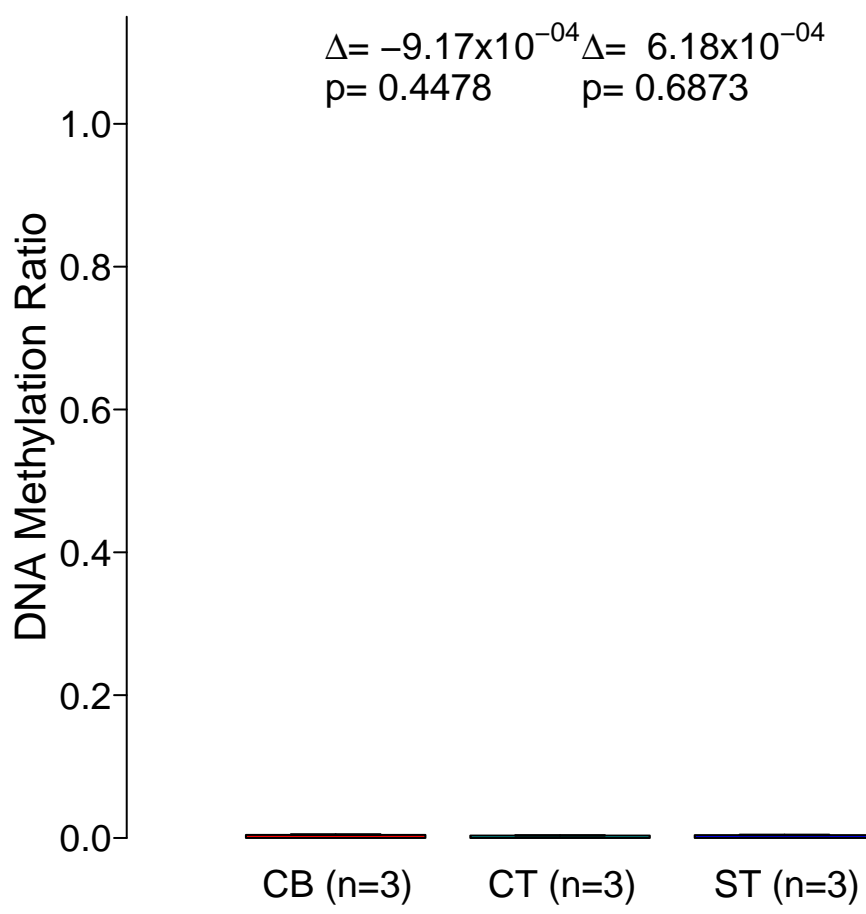

*BCL6* Chr3 187,458,863

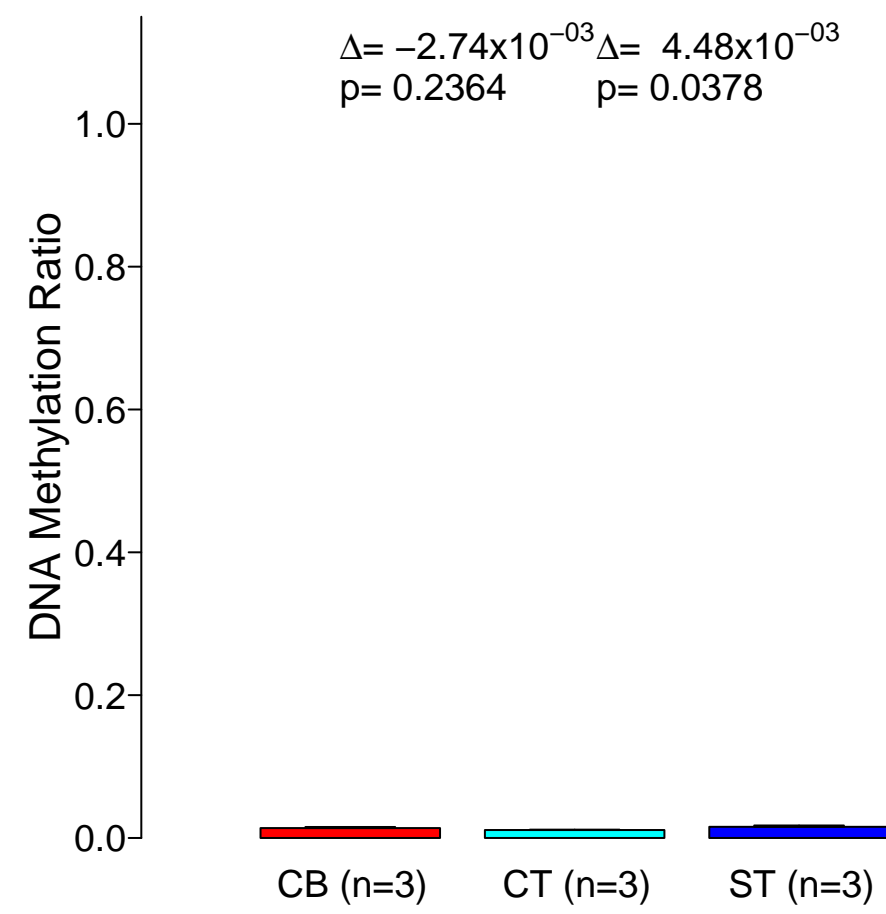

*BCL6* Chr3 187,458,877

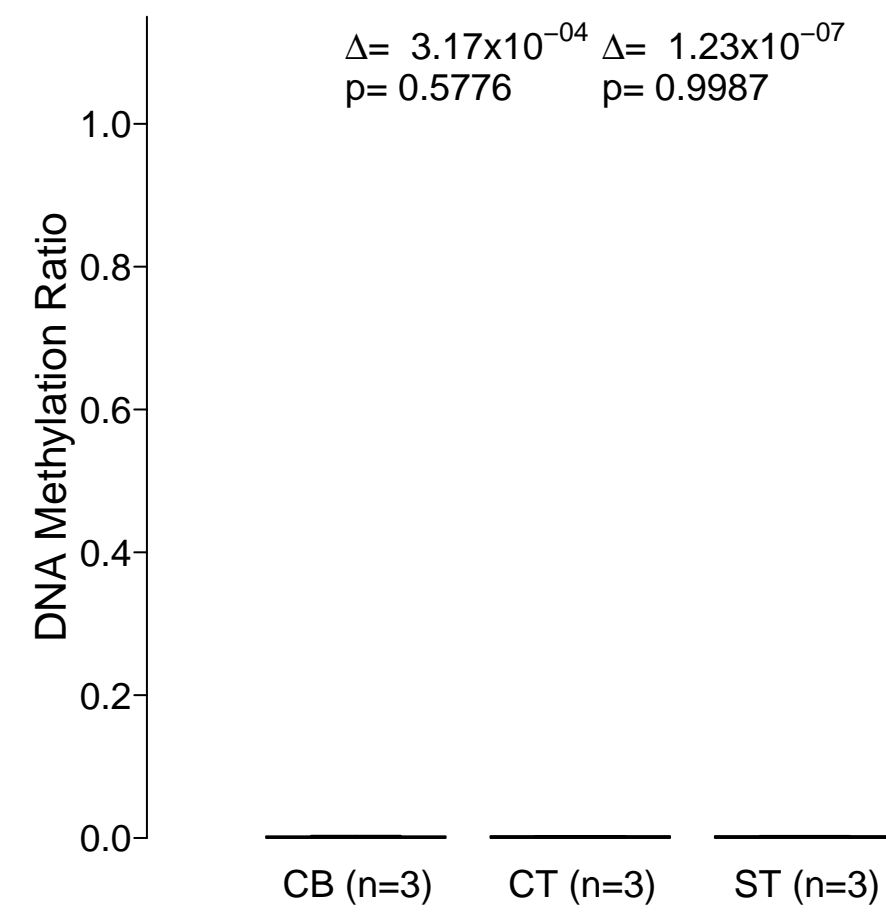

*BCL6* Chr3 187,458,888

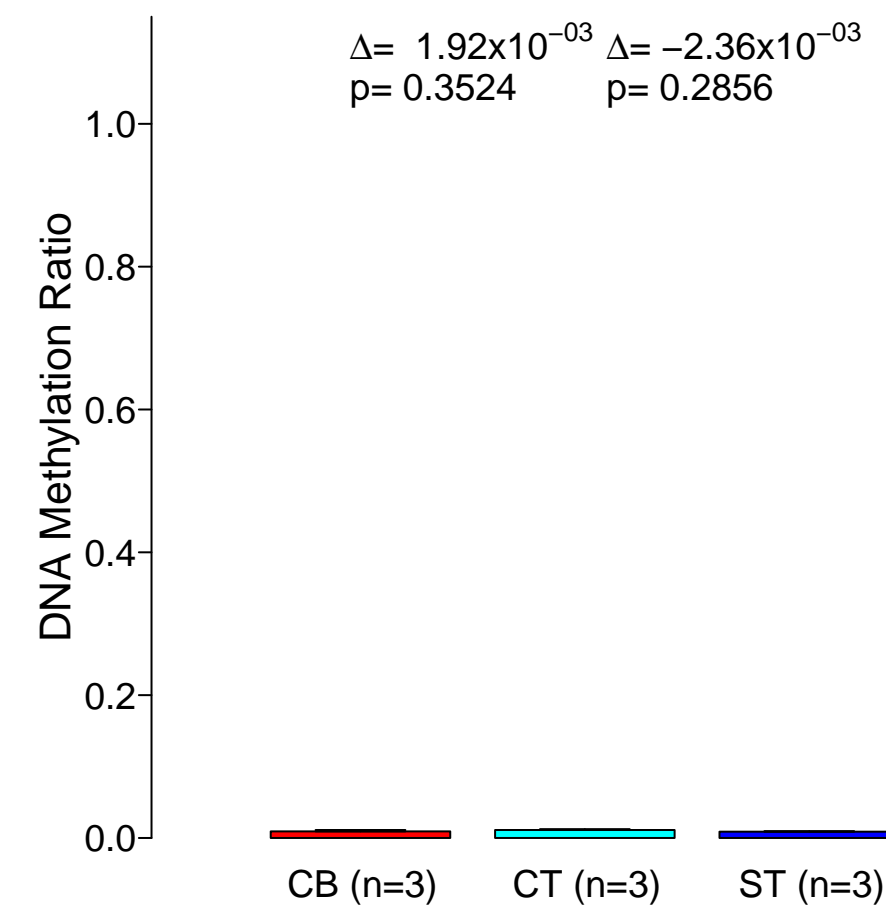

*BCL6* Chr3 187,458,918

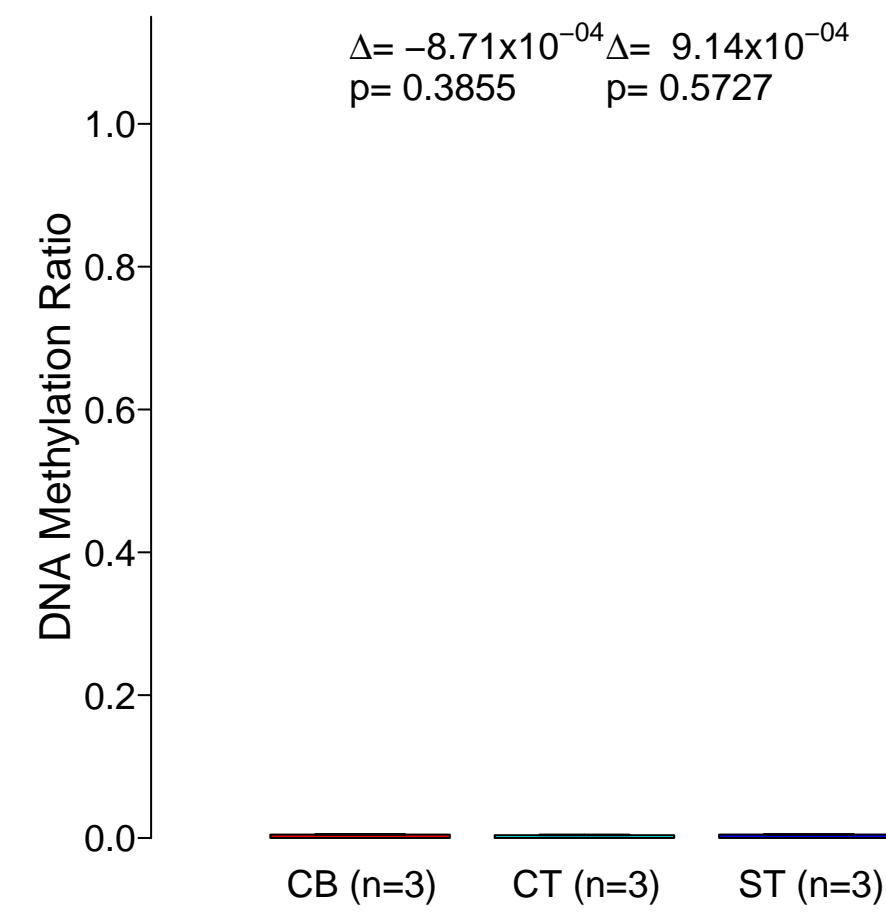



*BCL6* Chr3 187,458,986

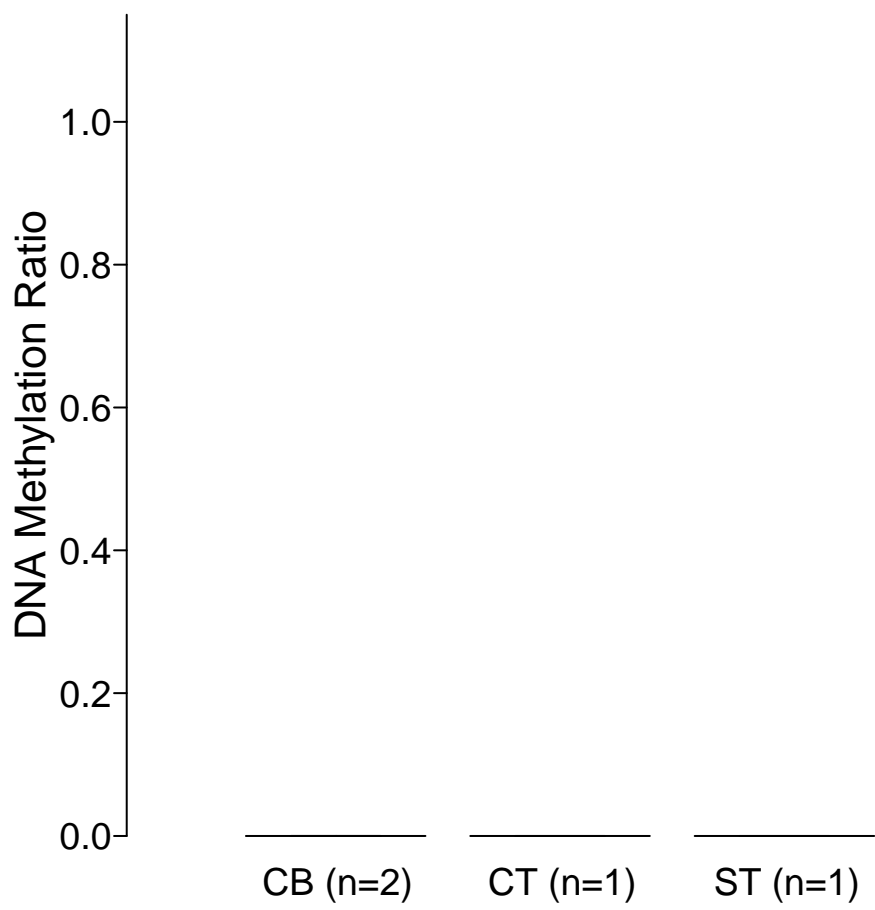

*BCL6* Chr3 187,458,995

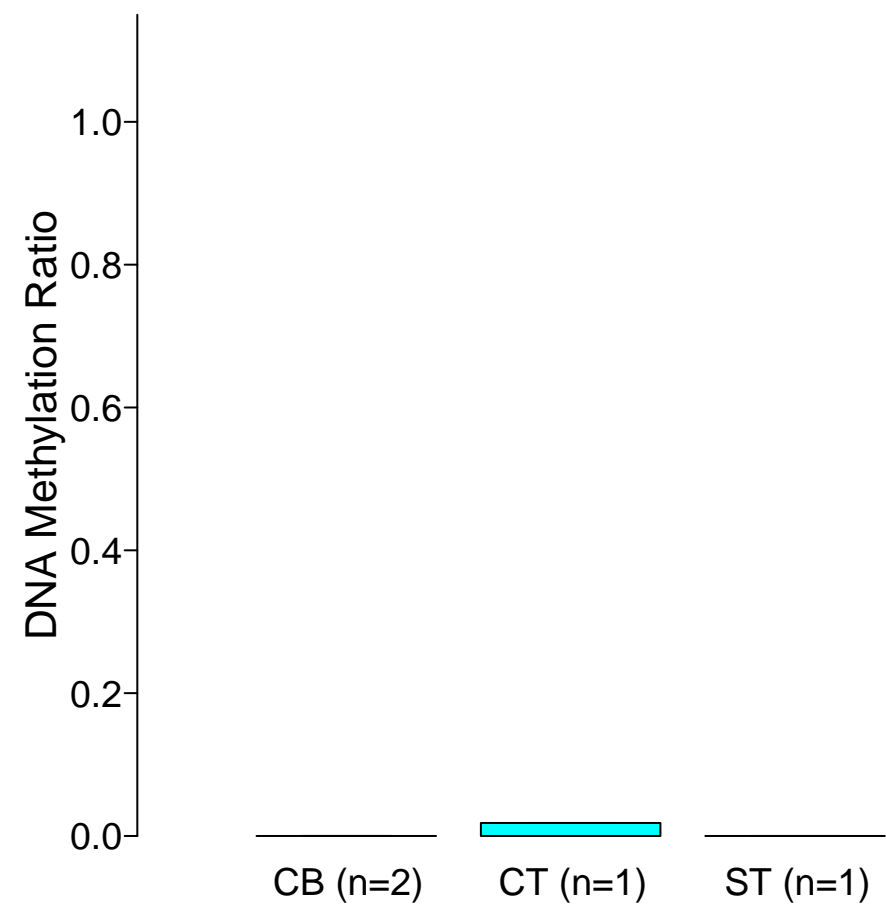

*BCL6* Chr3 187,459,004

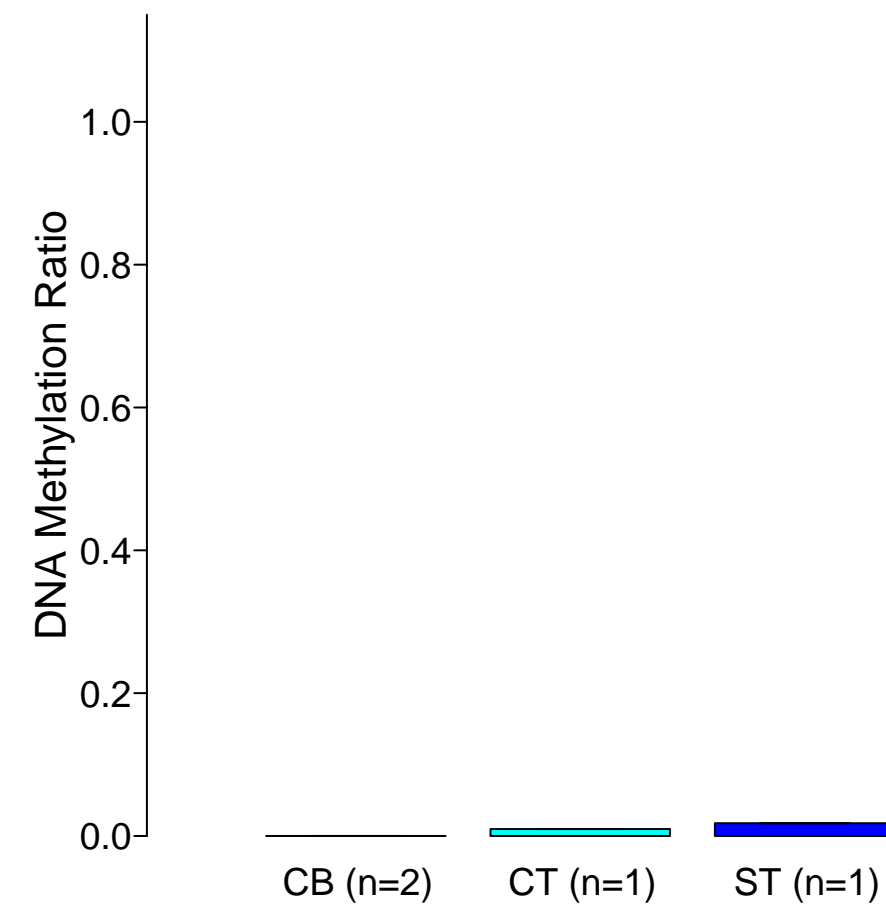

*BCL6* Chr3 187,459,022

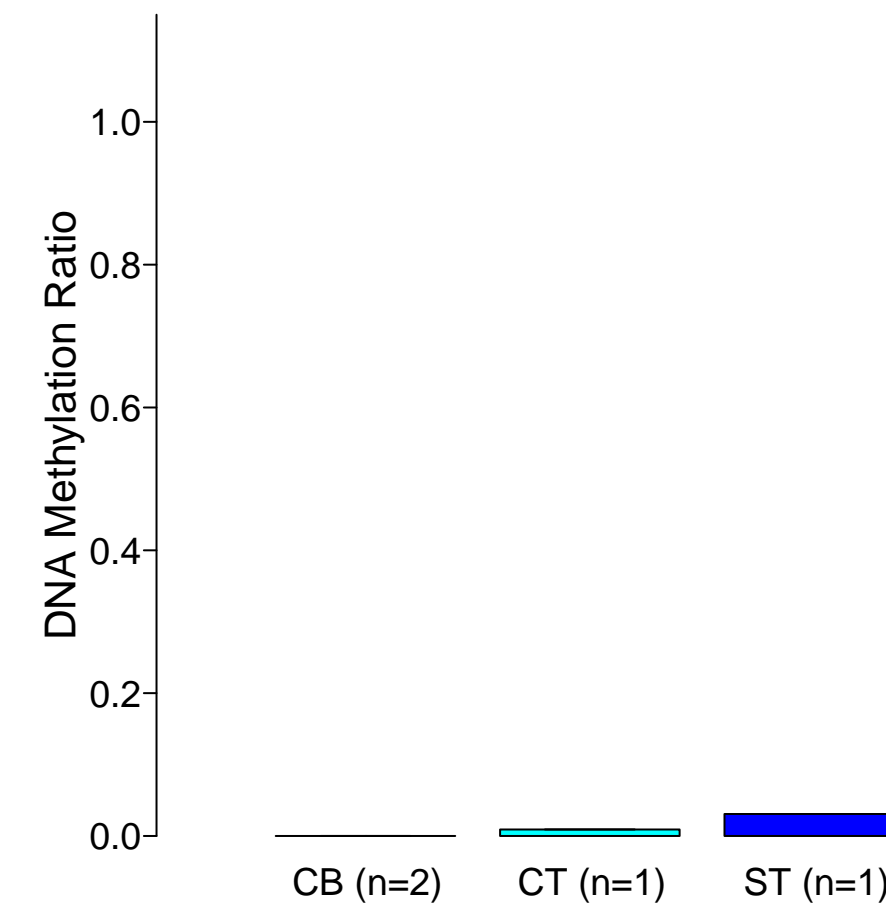

*BCL6* Chr3 187,459,024

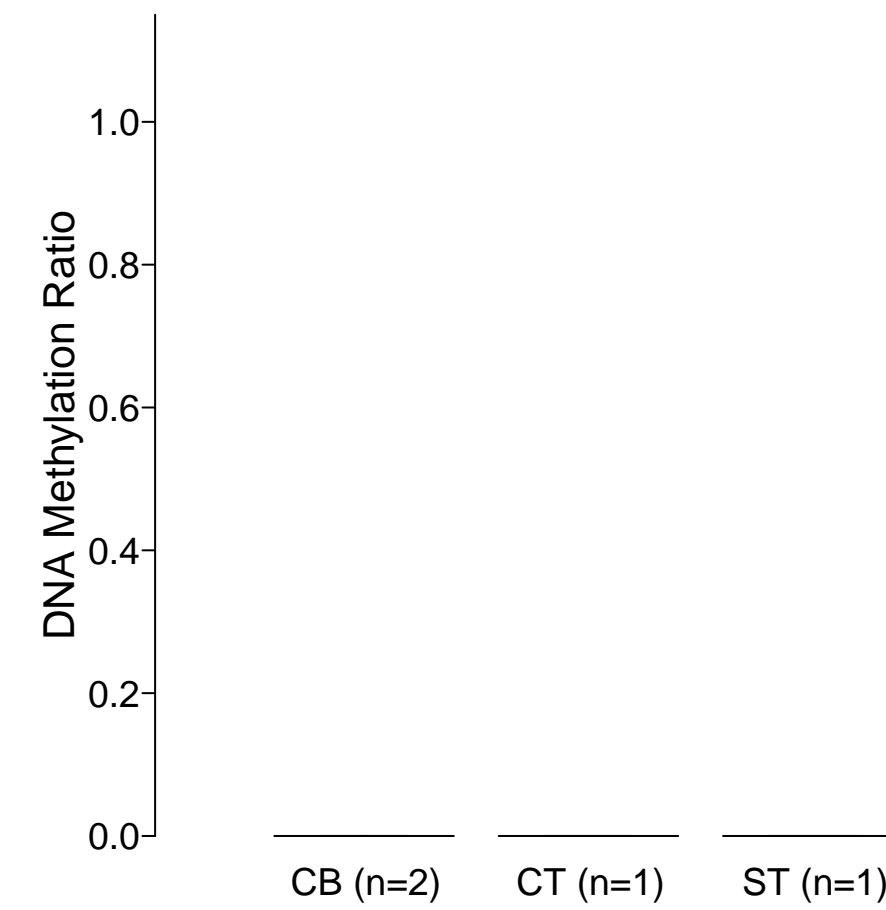

*BCL6* Chr3 187,459,076

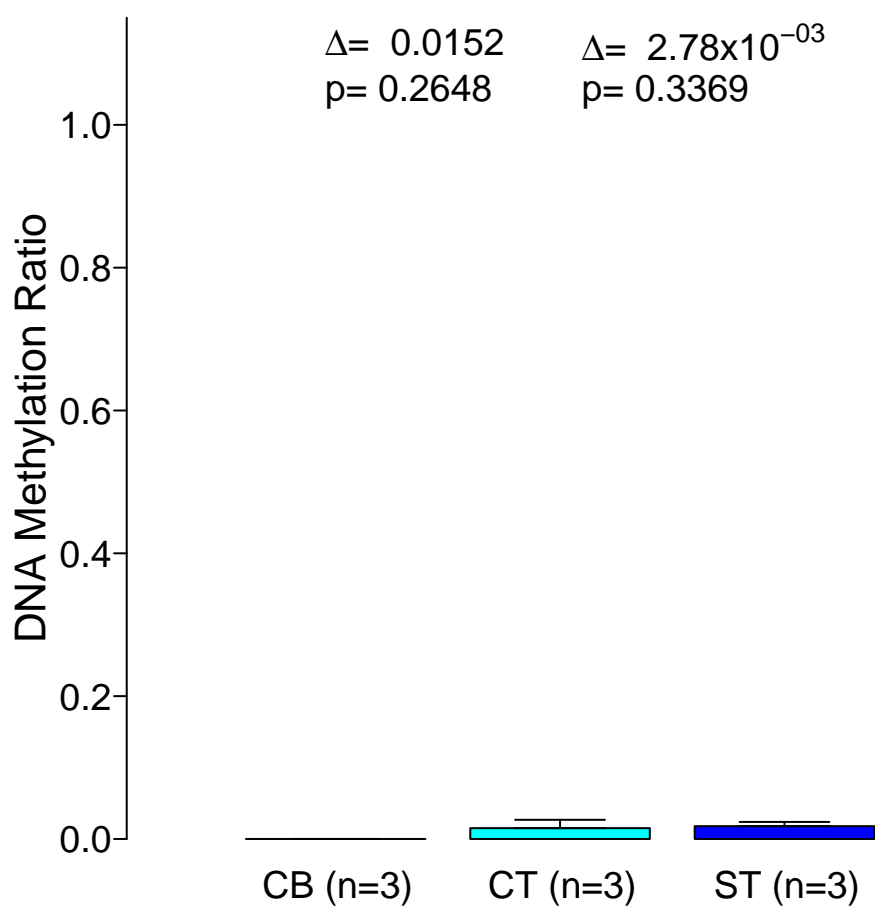

*BCL6* Chr3 187,459,141

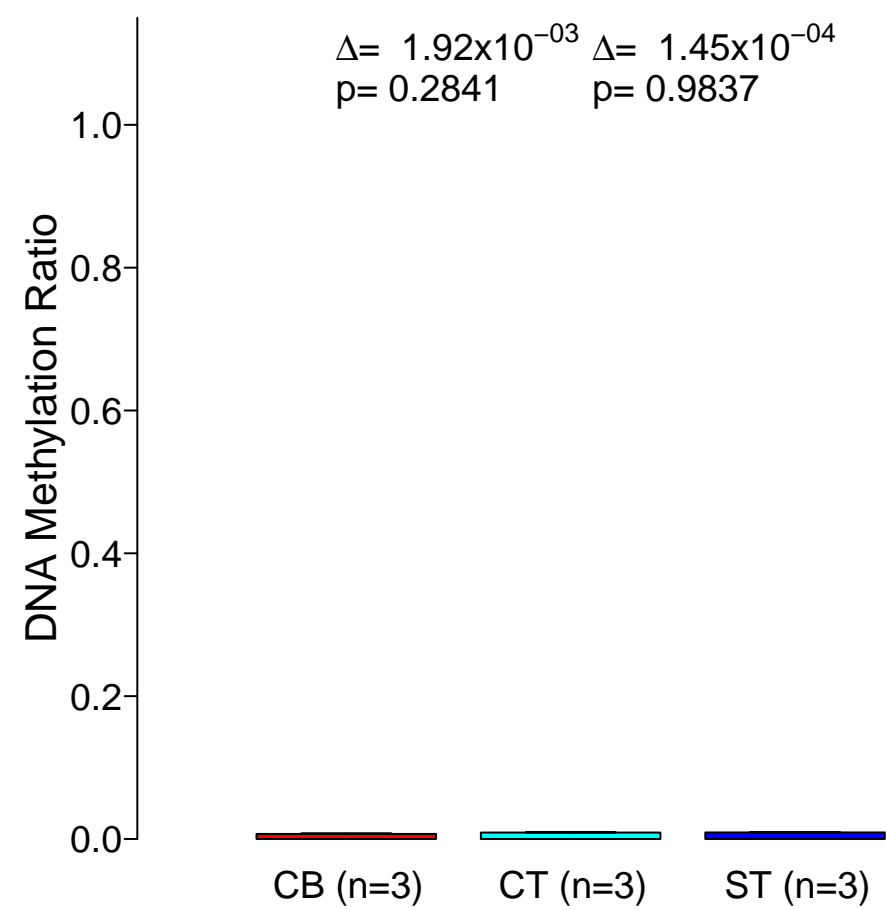

*BCL6* Chr3 187,459,194

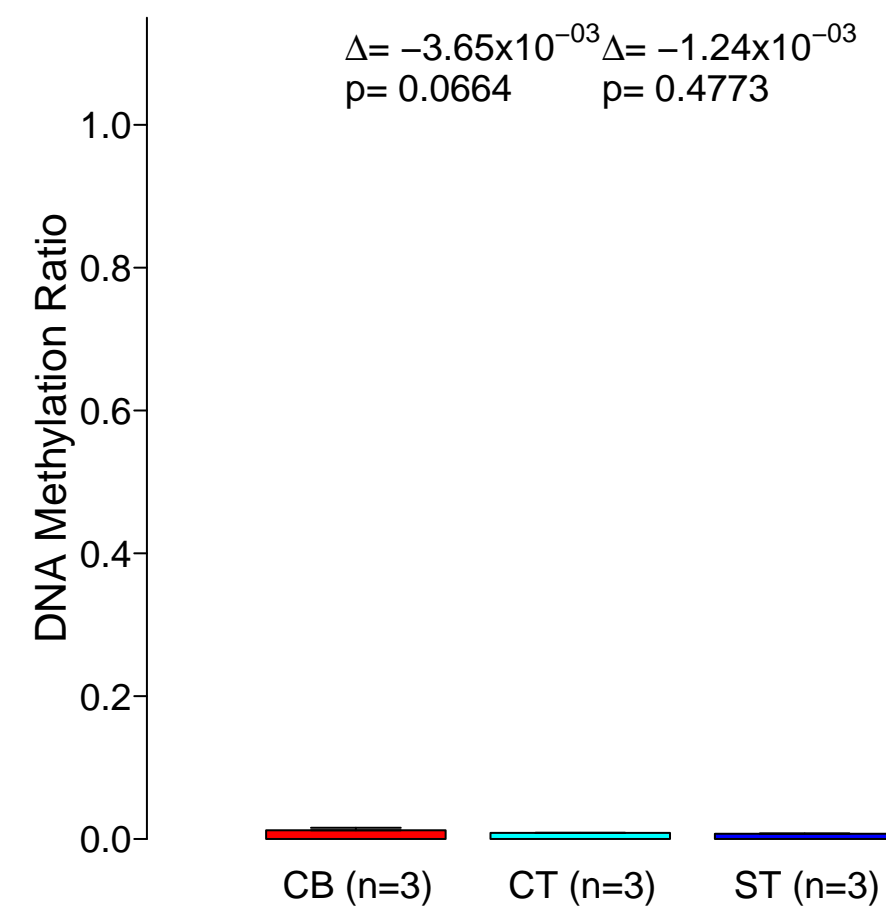

*BCL6* Chr3 187,459,217

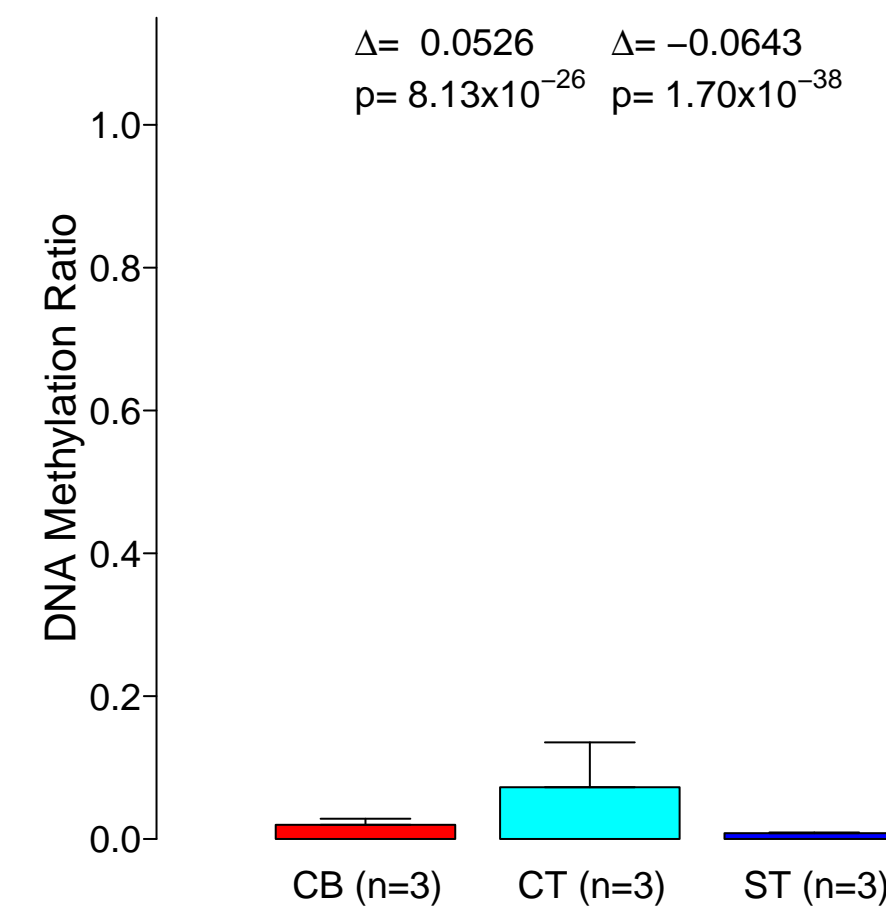

*BCL6* Chr3 187,459,230

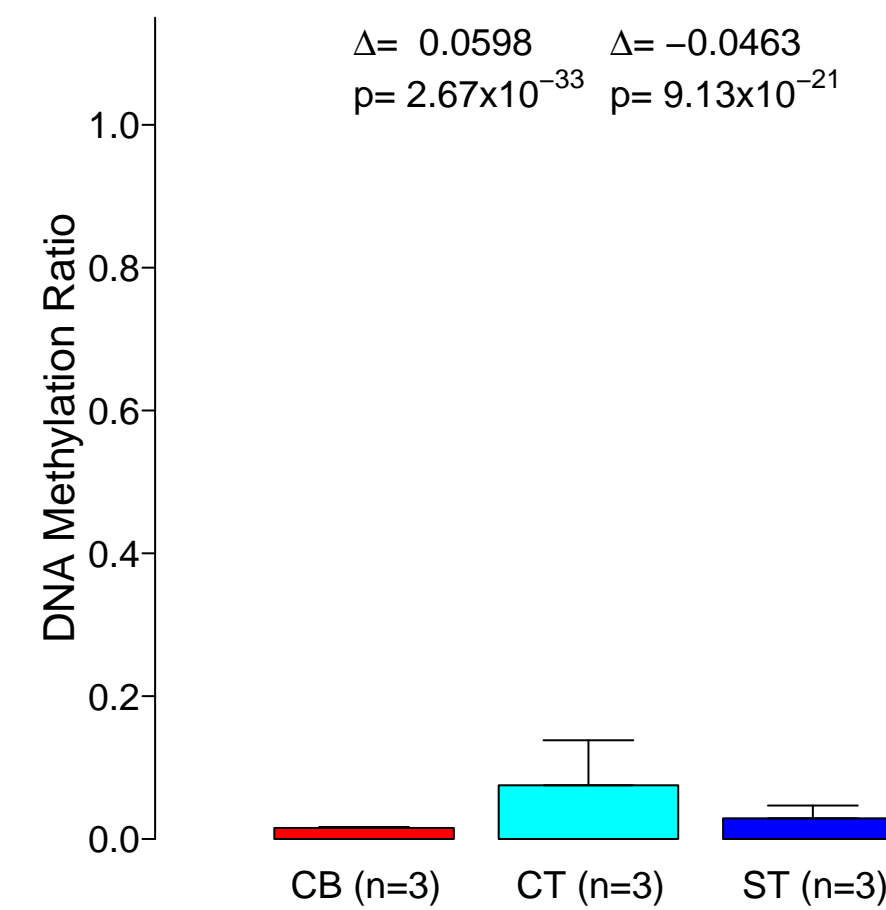

*BCL6* Chr3 187,459,240

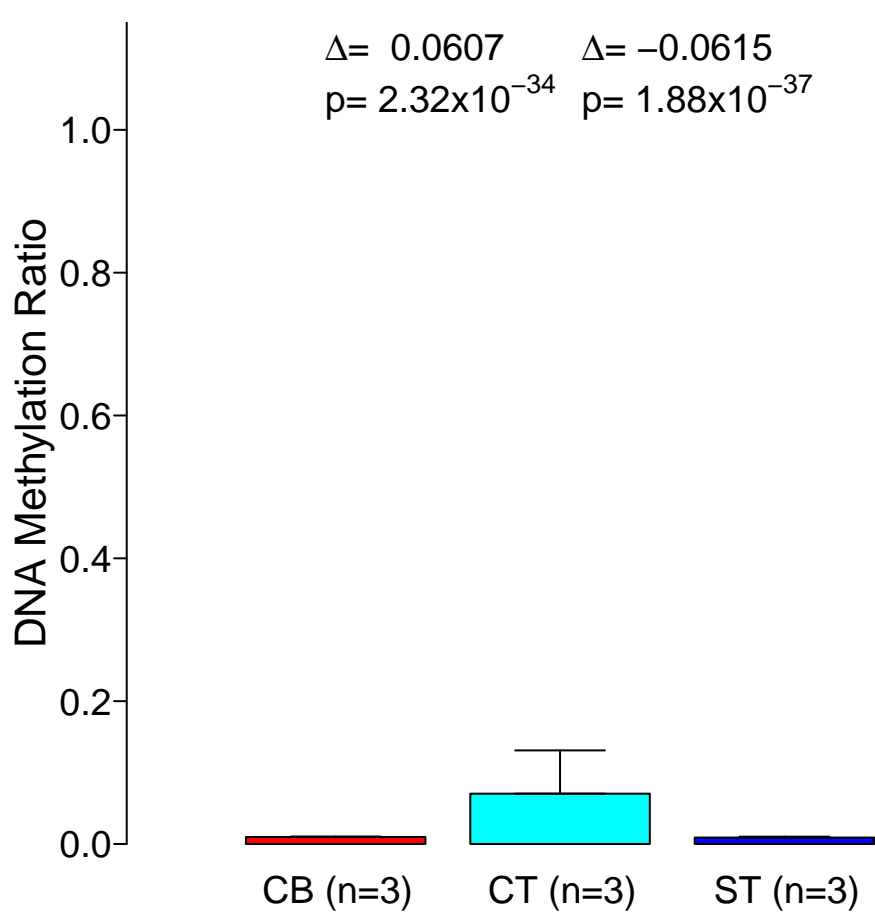

*BCL6* Chr3 187,459,269

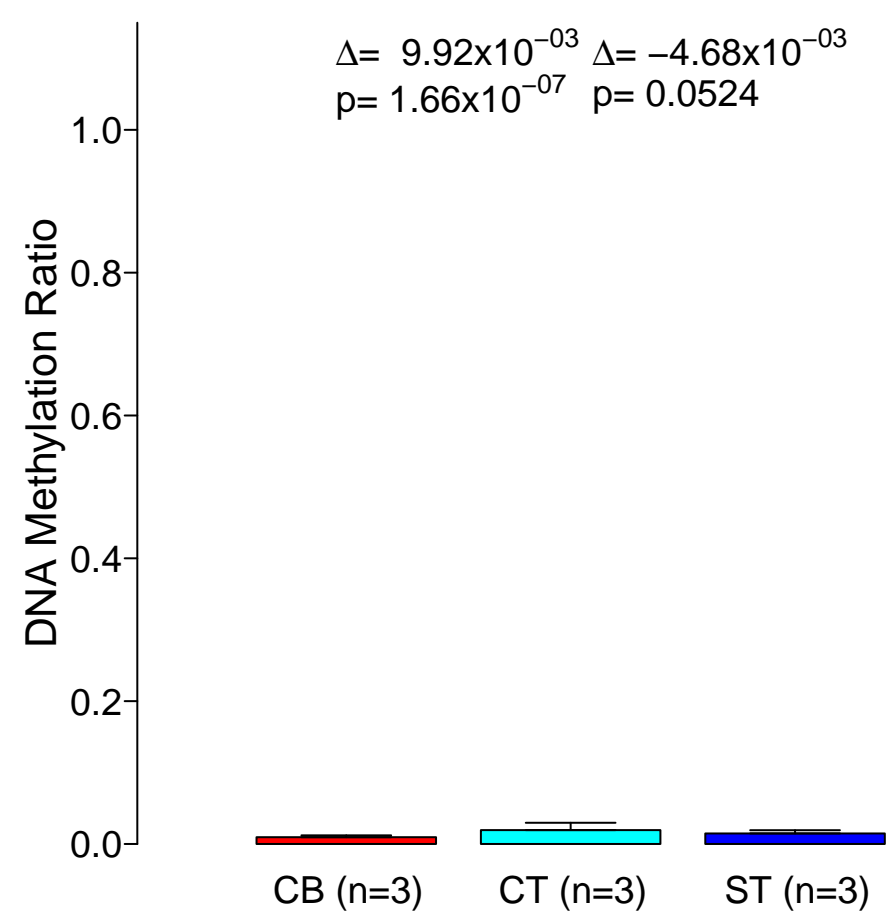

*BCL6* Chr3 187,459,281

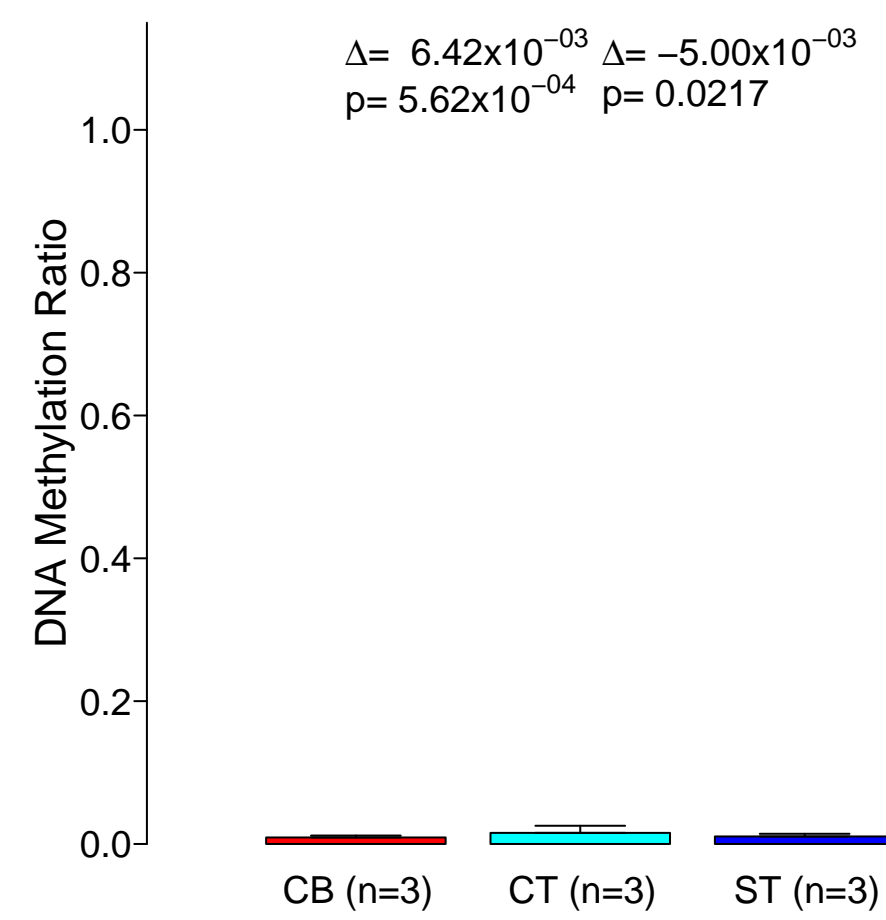

*BCL6* Chr3 187,459,297

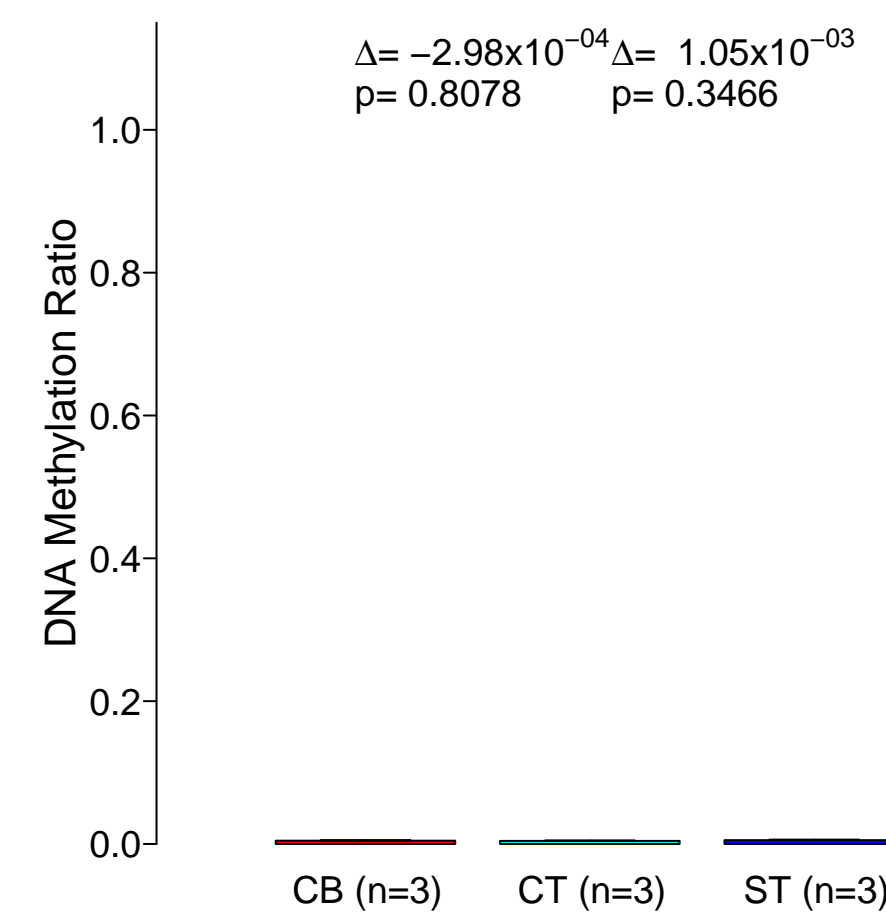

*BCL6* Chr3 187,459,329

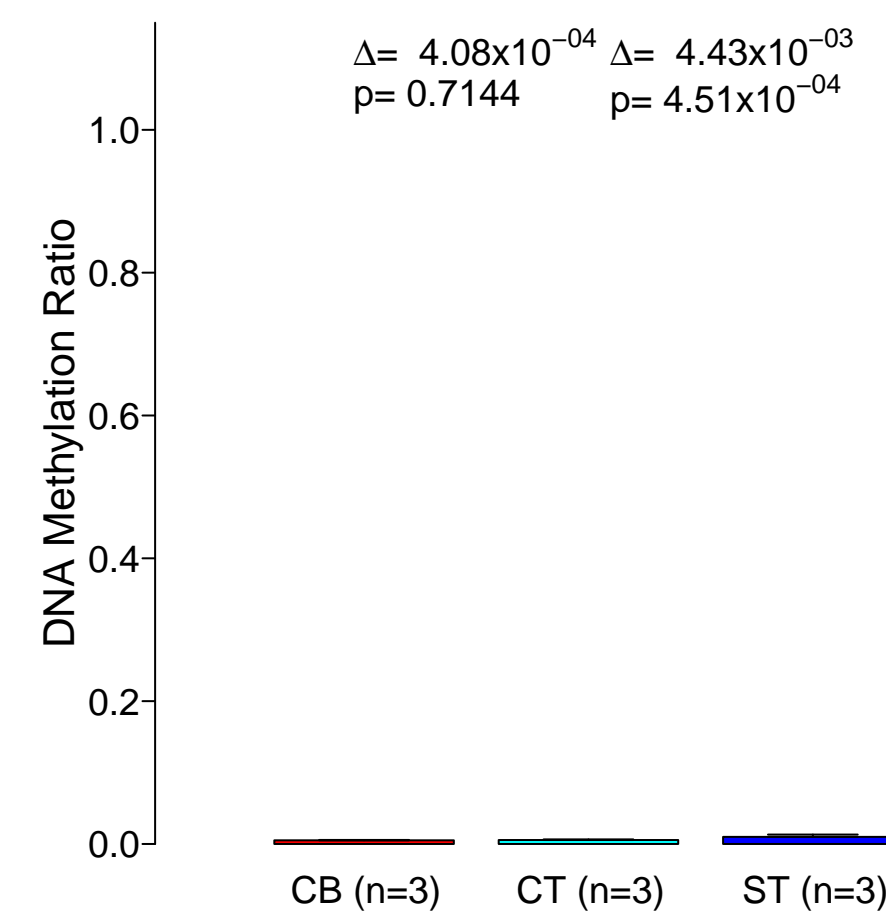

*BCL6* Chr3 187,459,341

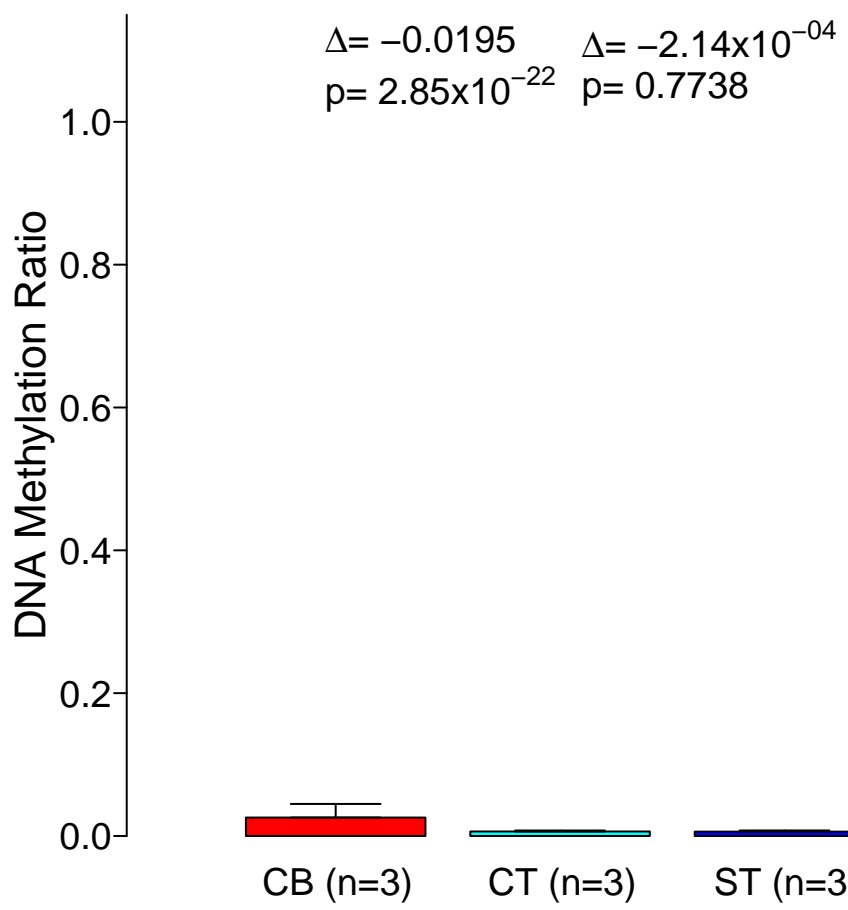

*BCL6* Chr3 187,459,360

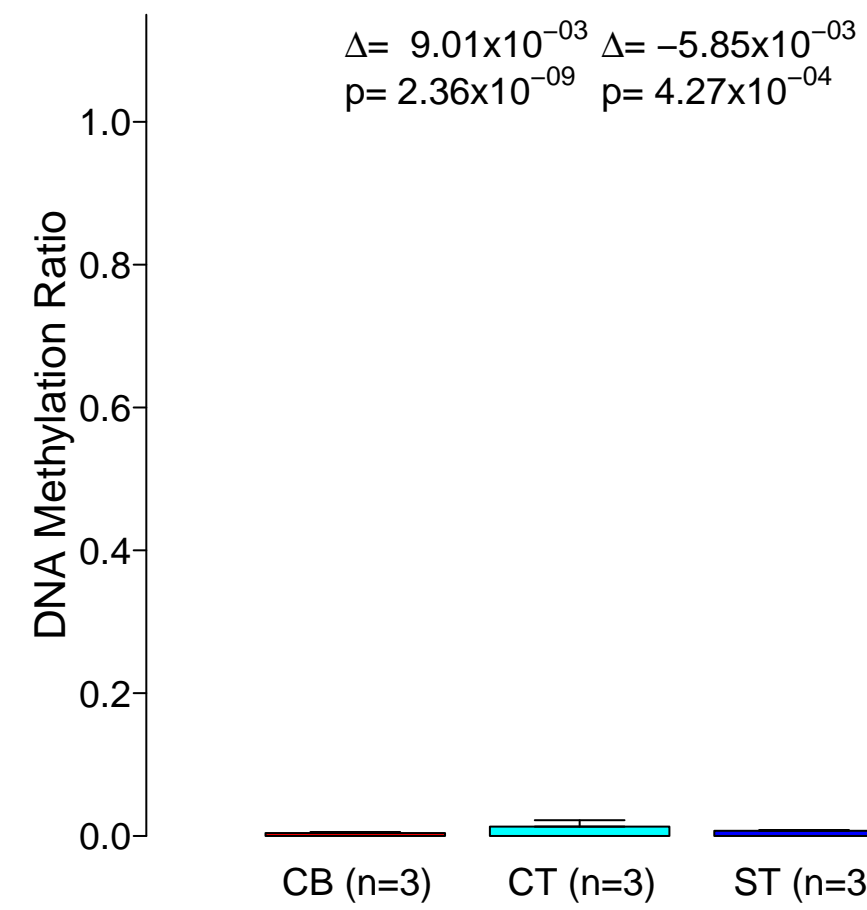

*BCL6* Chr3 187,459,410

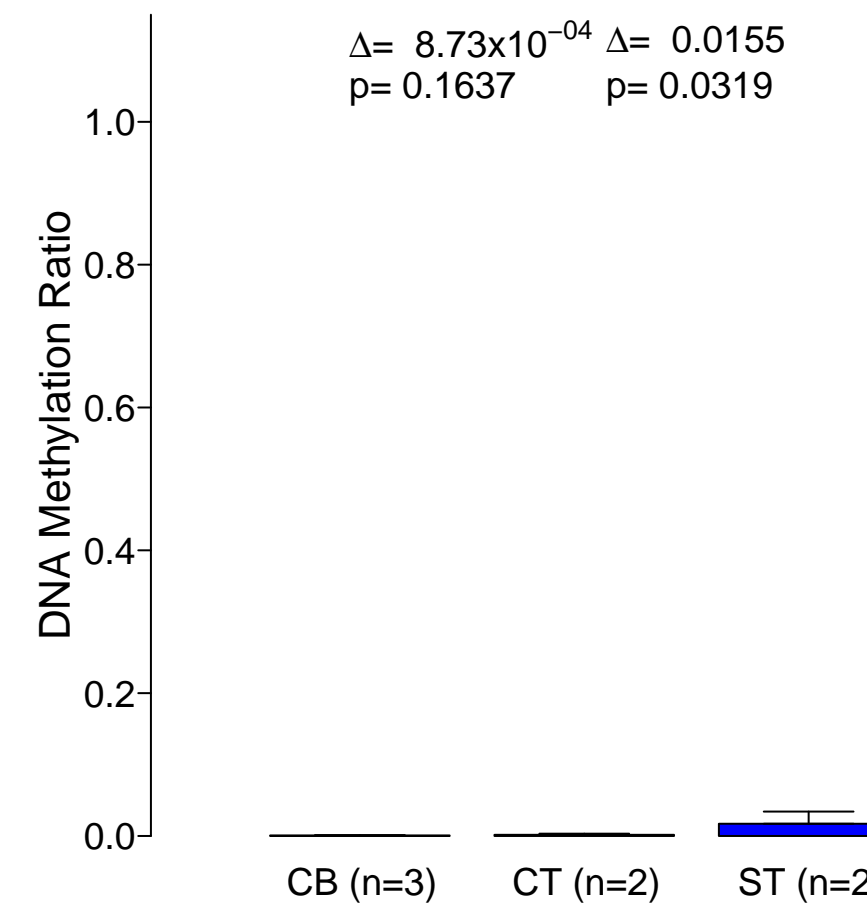

*BCL6* Chr3 187,459,421

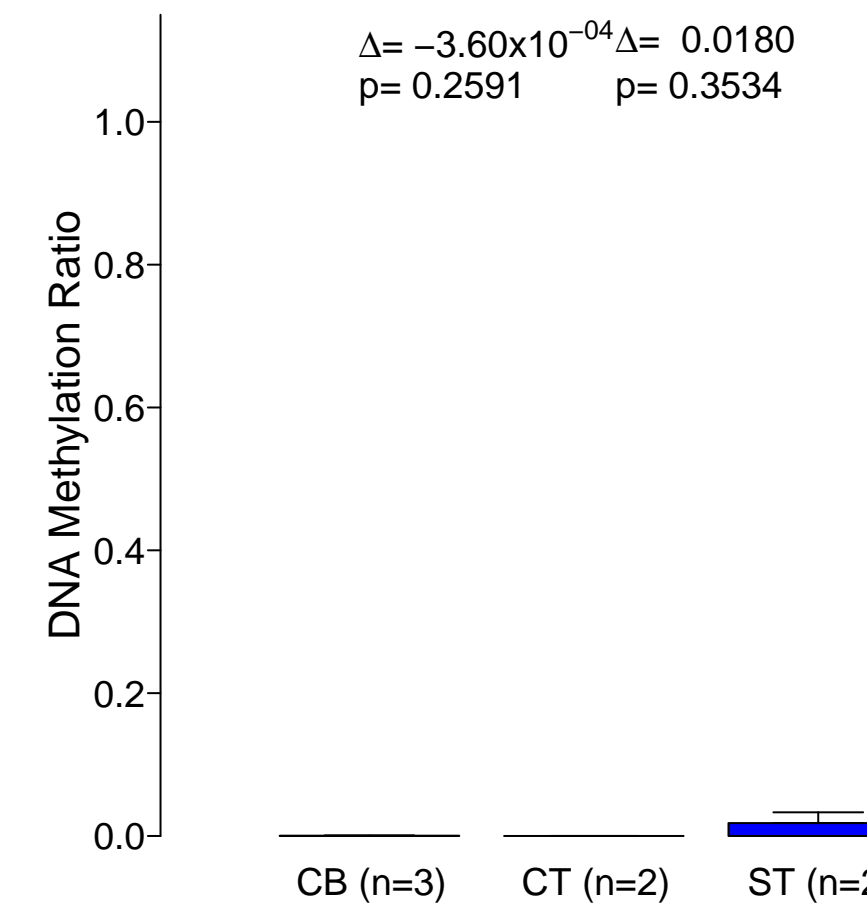

*BCL6* Chr3 187,459,430

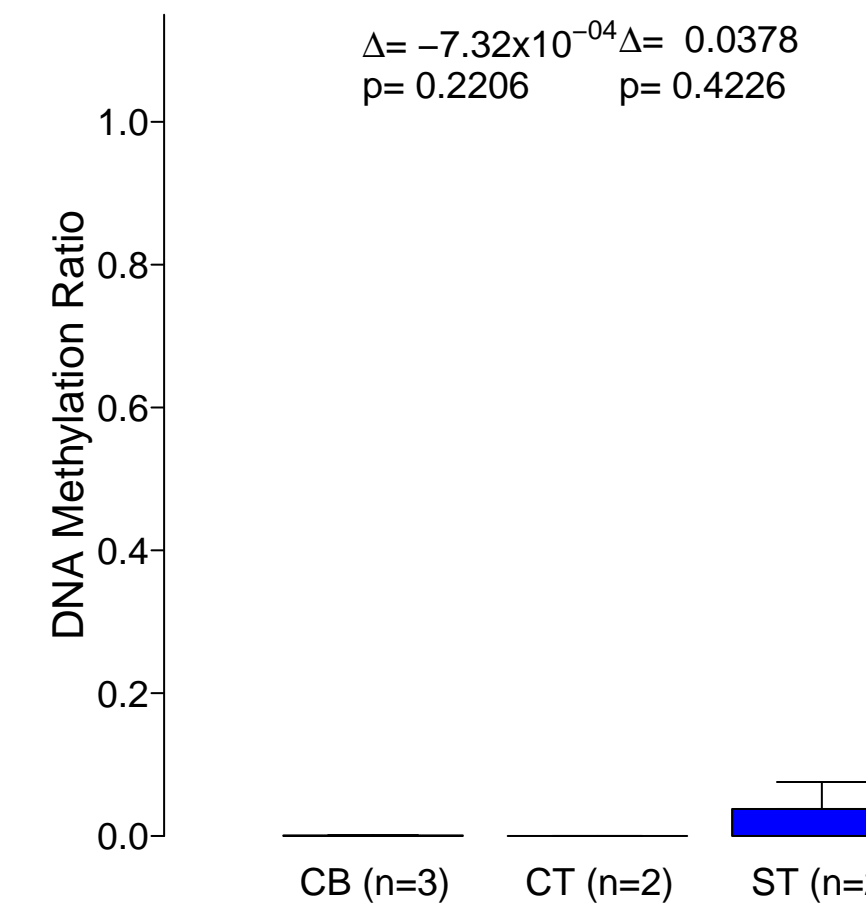

*BCL6* Chr3 187,459,432

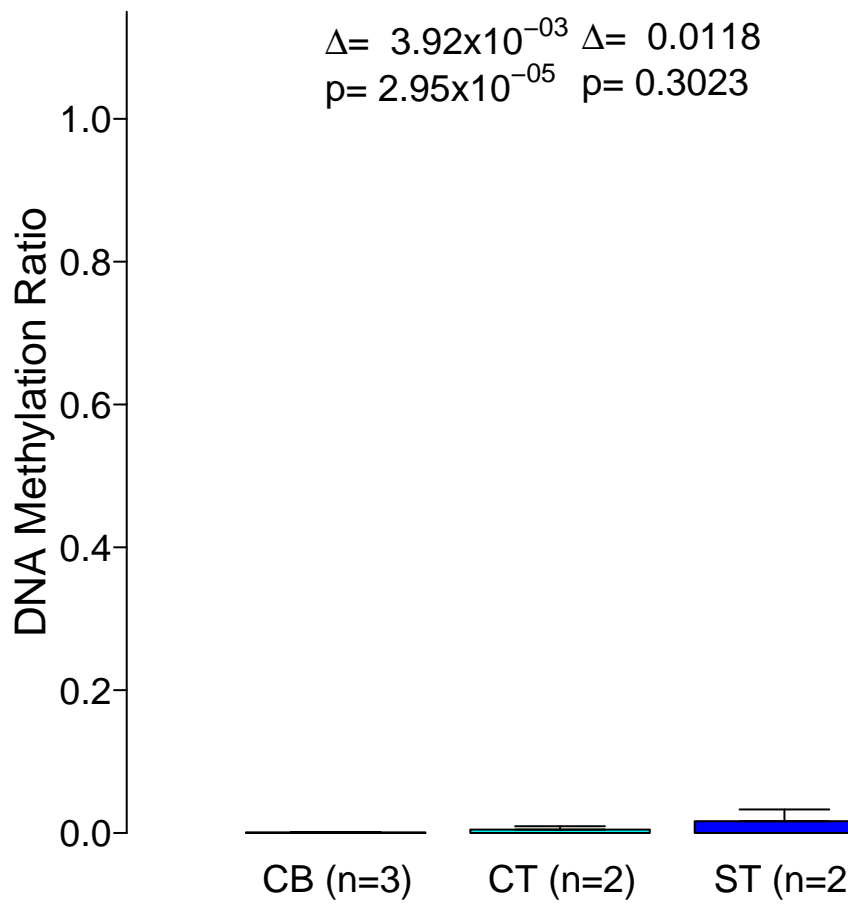

*BCL6* Chr3 187,459,435

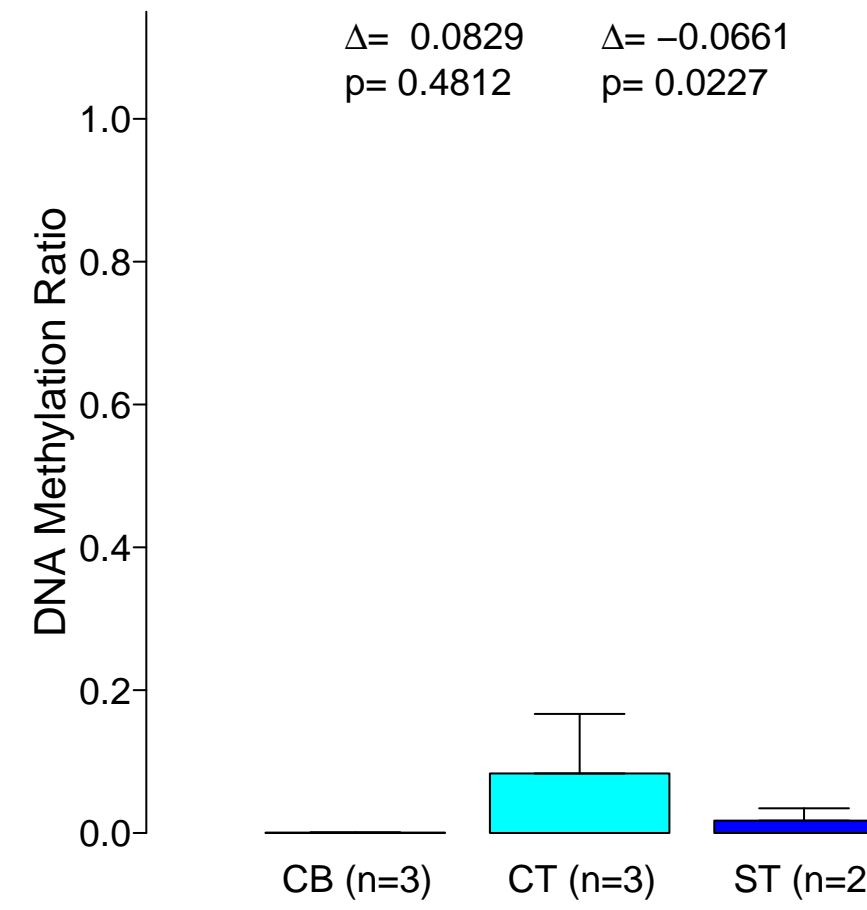

*BCL6* Chr3 187,459,441

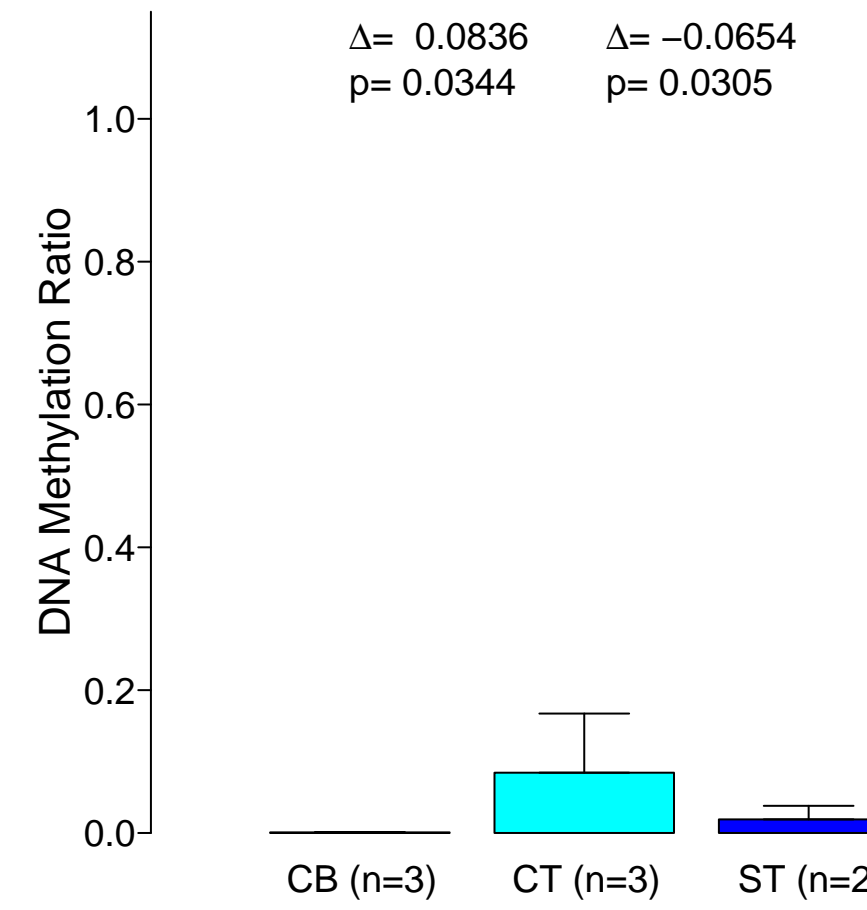

*BCL6* Chr3 187,459,444

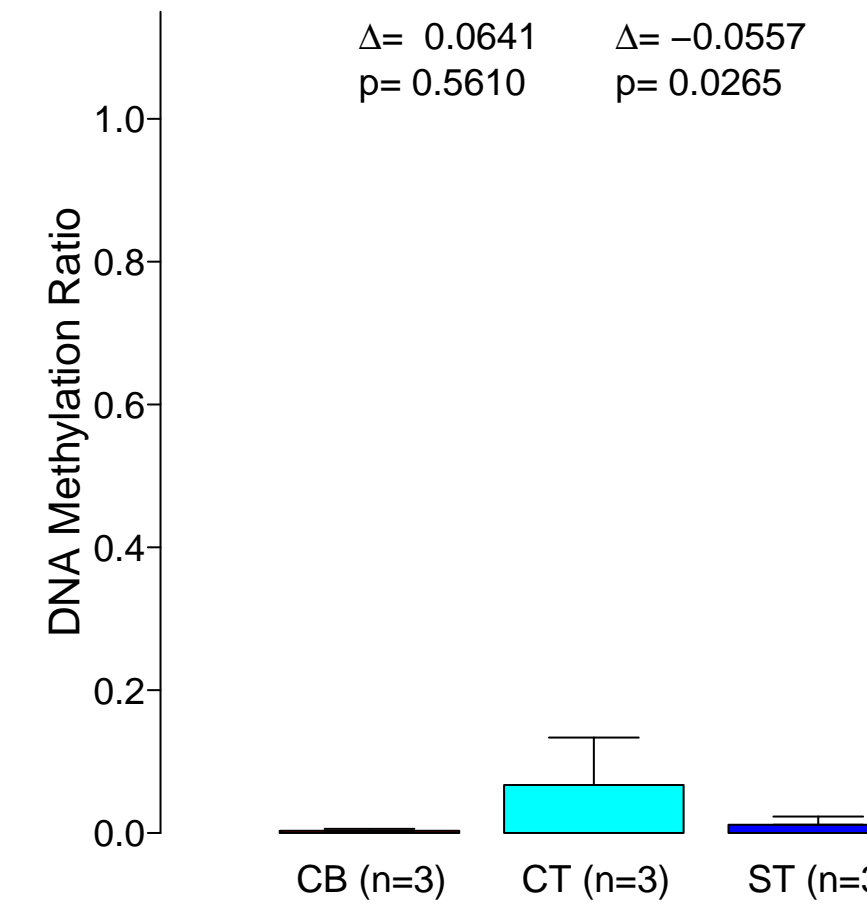

*BCL6* Chr3 187,459,459

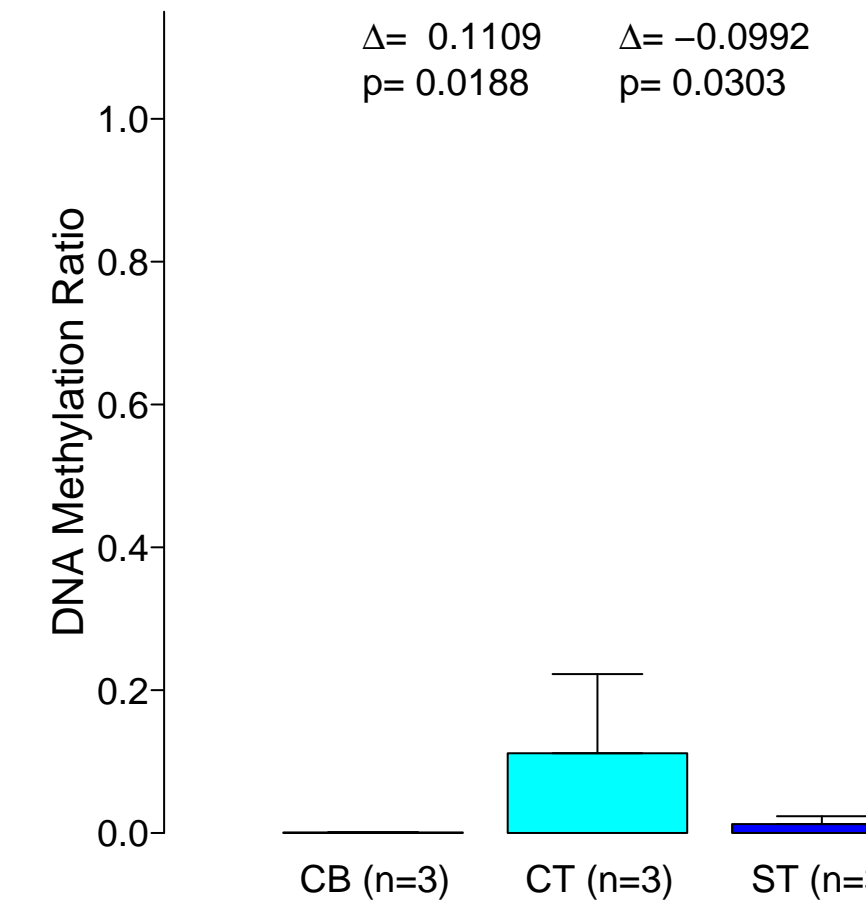

*BCL6* Chr3 187,459,474

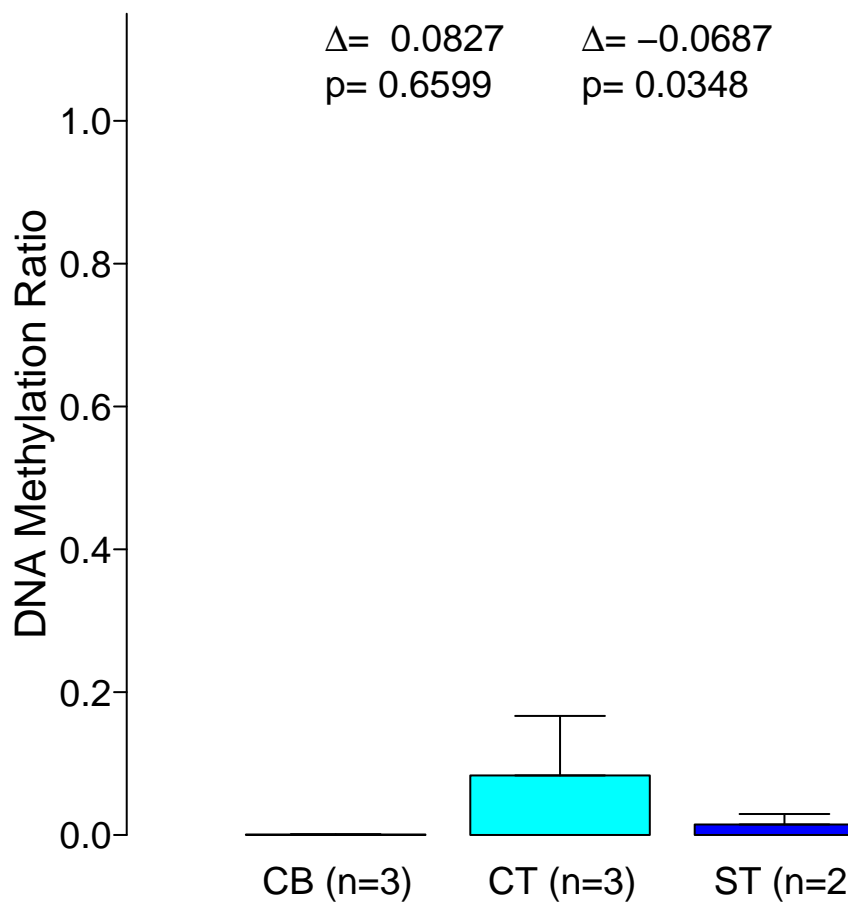

*BCL6* Chr3 187,459,479

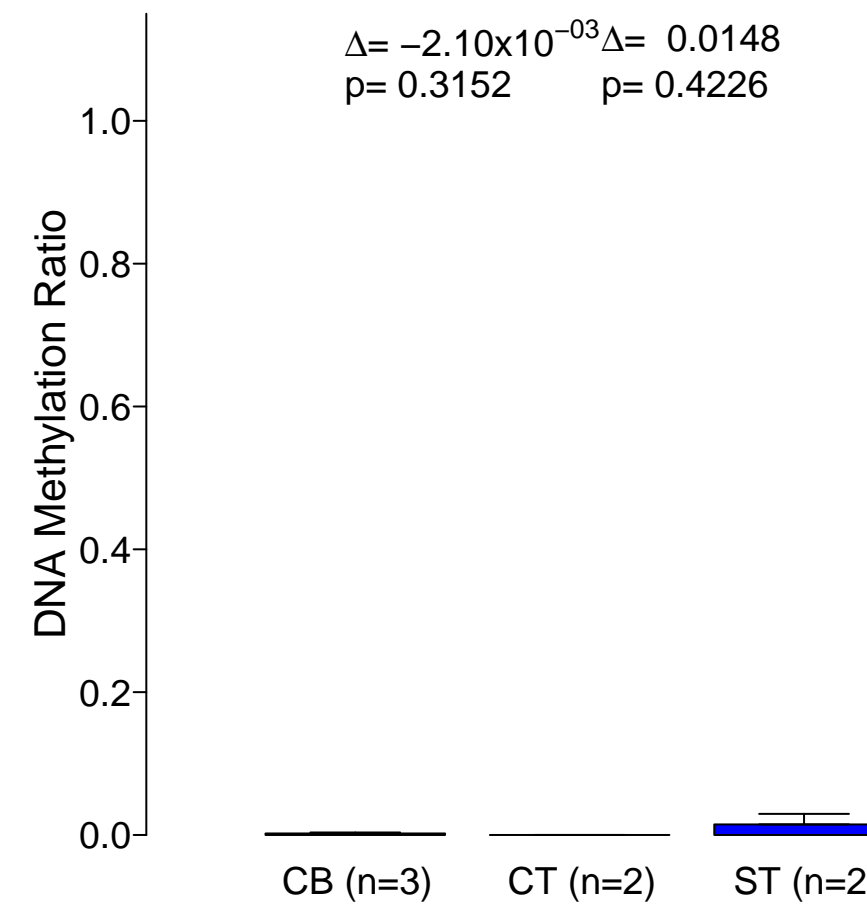

*BCL6* Chr3 187,459,481

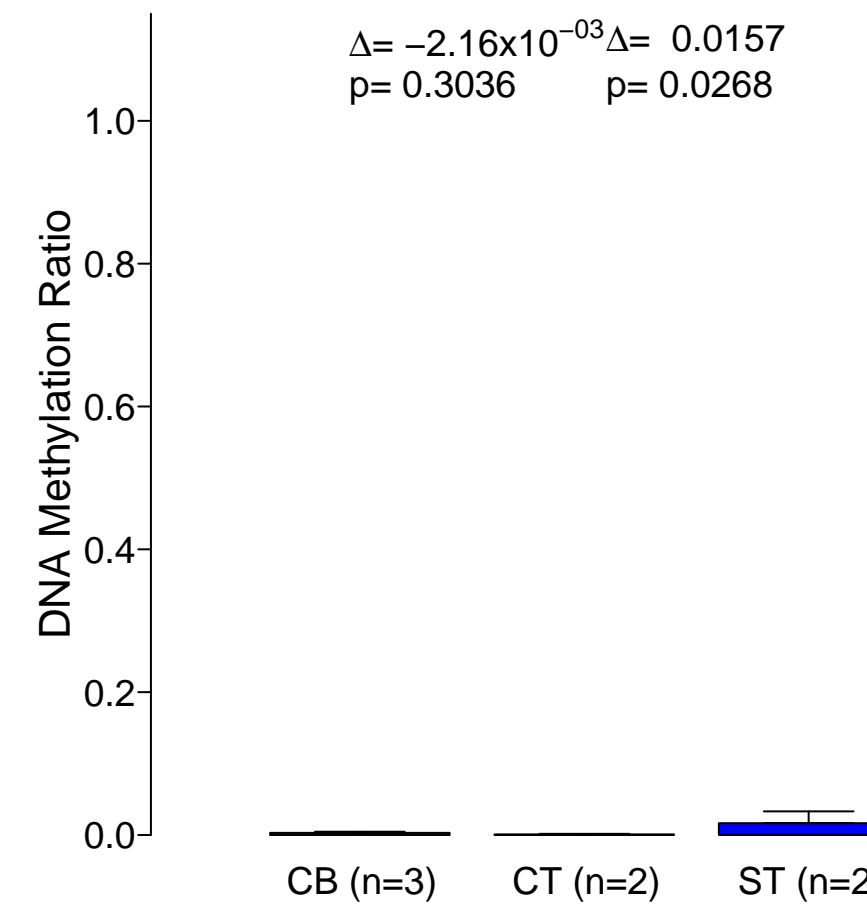

*BCL6* Chr3 187,459,488

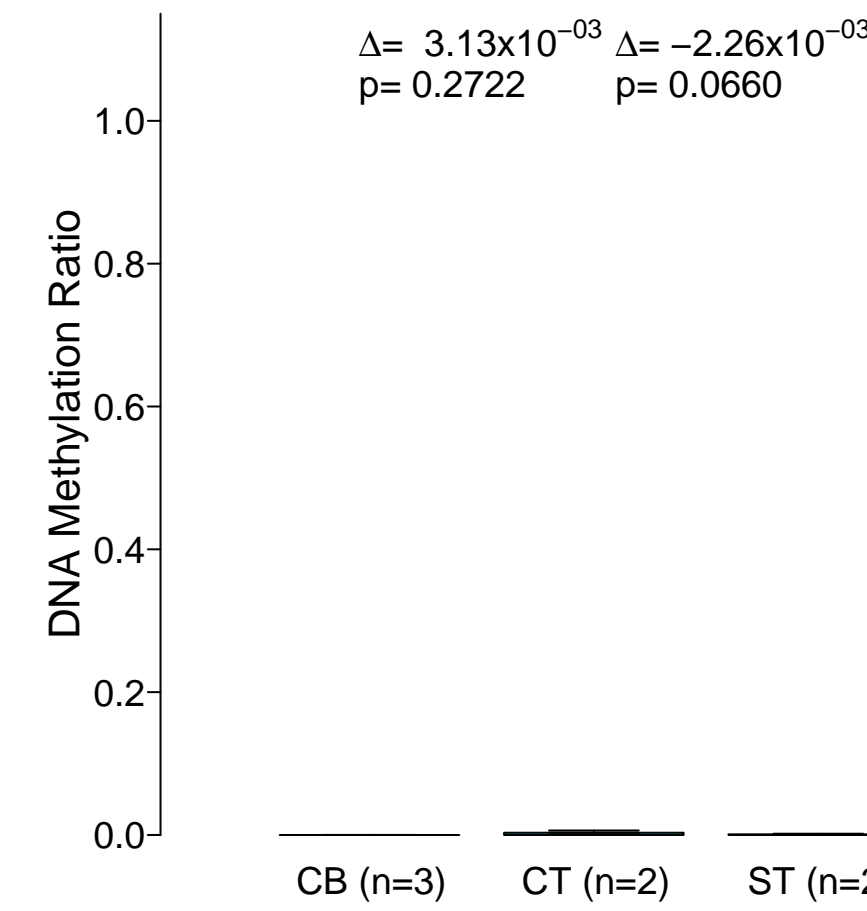

*BCL6* Chr3 187,459,534

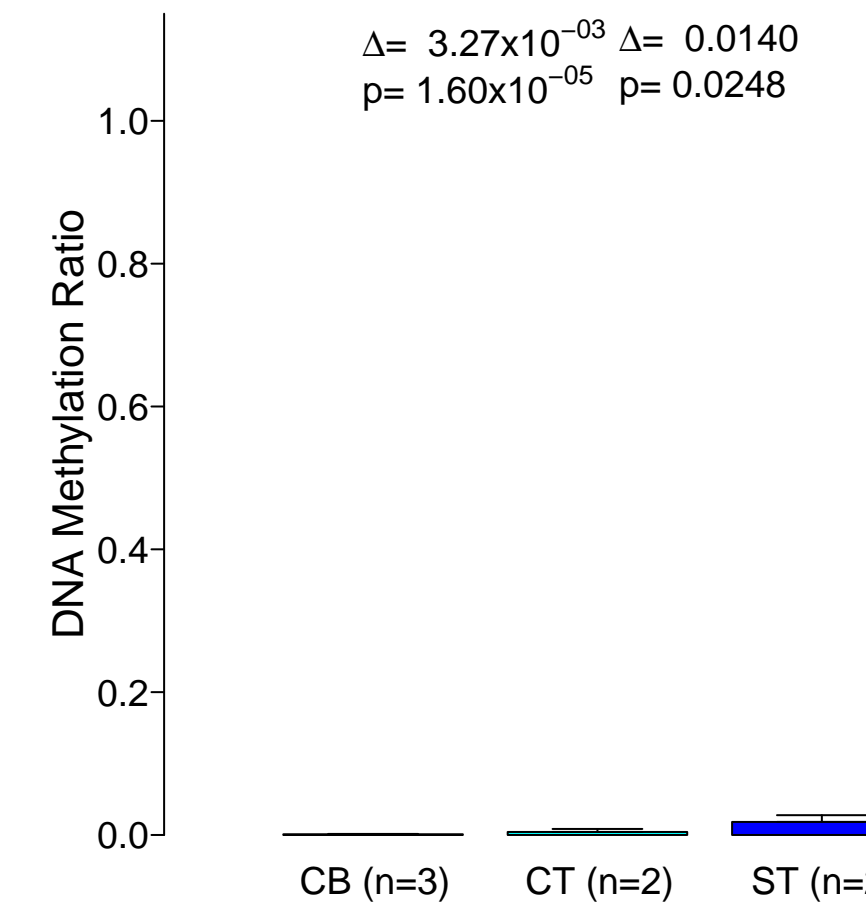

*BCL6* Chr3 187,459,573

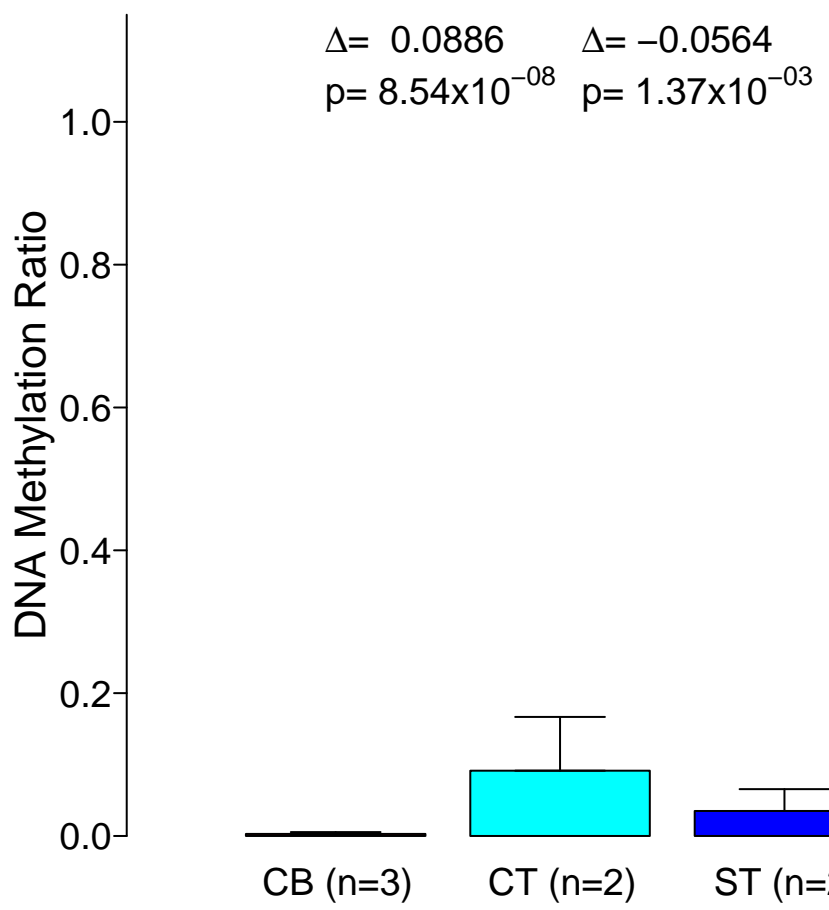

*BCL6* Chr3 187,459,584

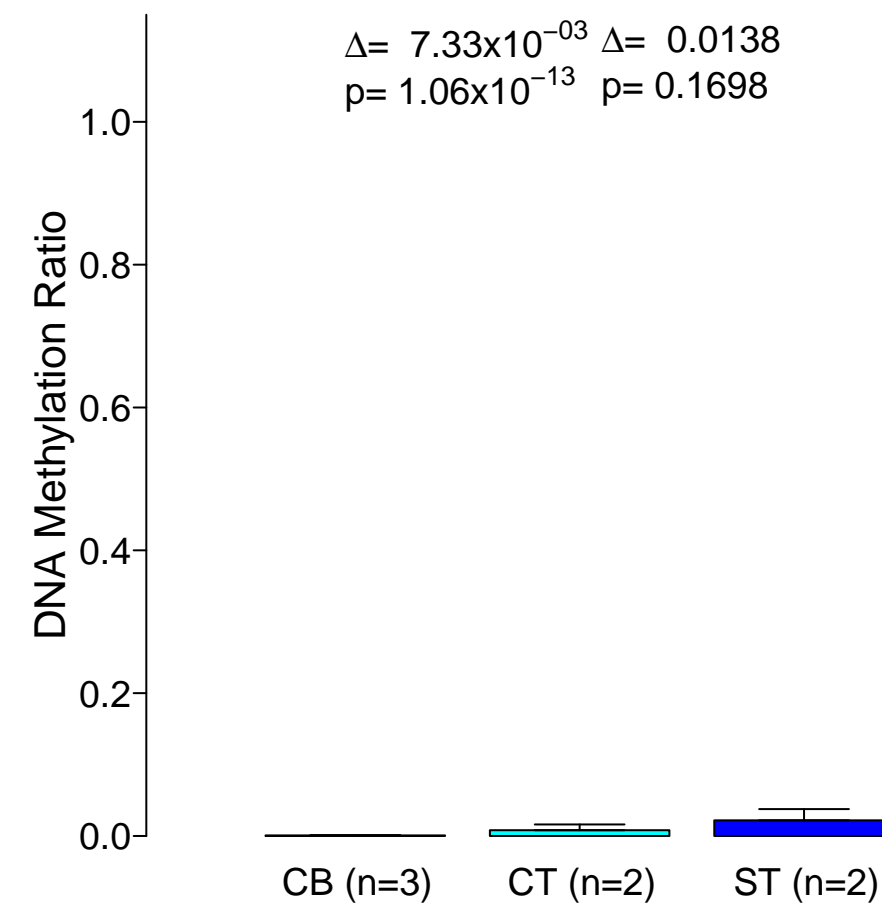

*BCL6* Chr3 187,459,587

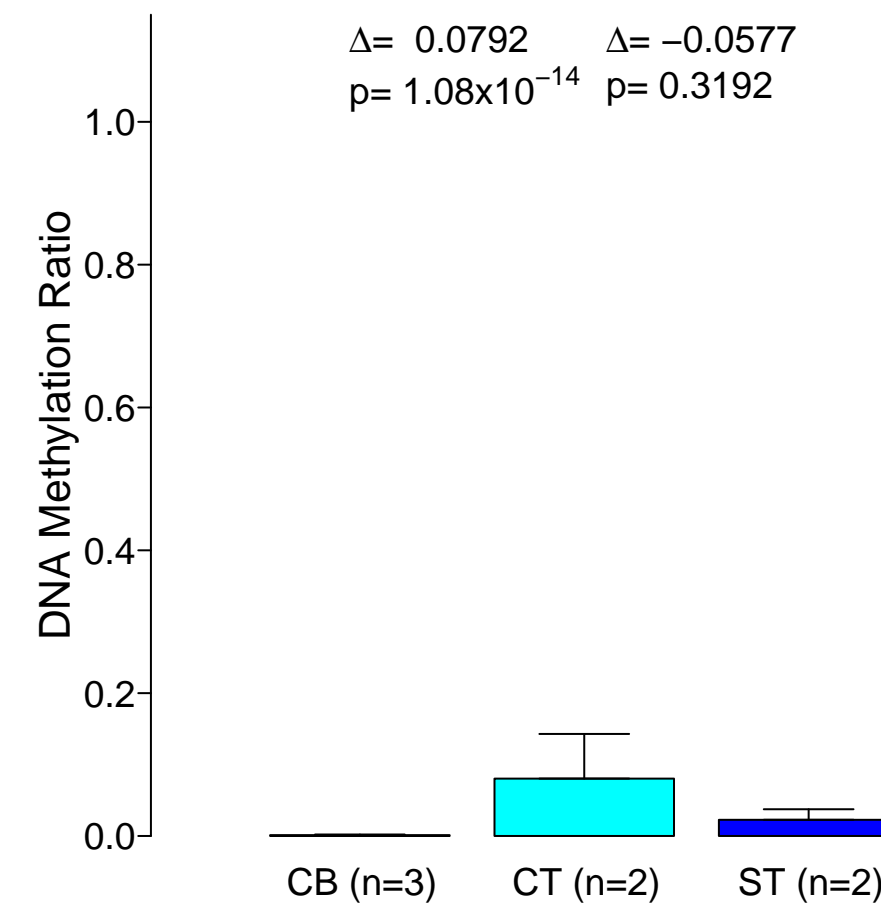

*BCL6* Chr3 187,459,649

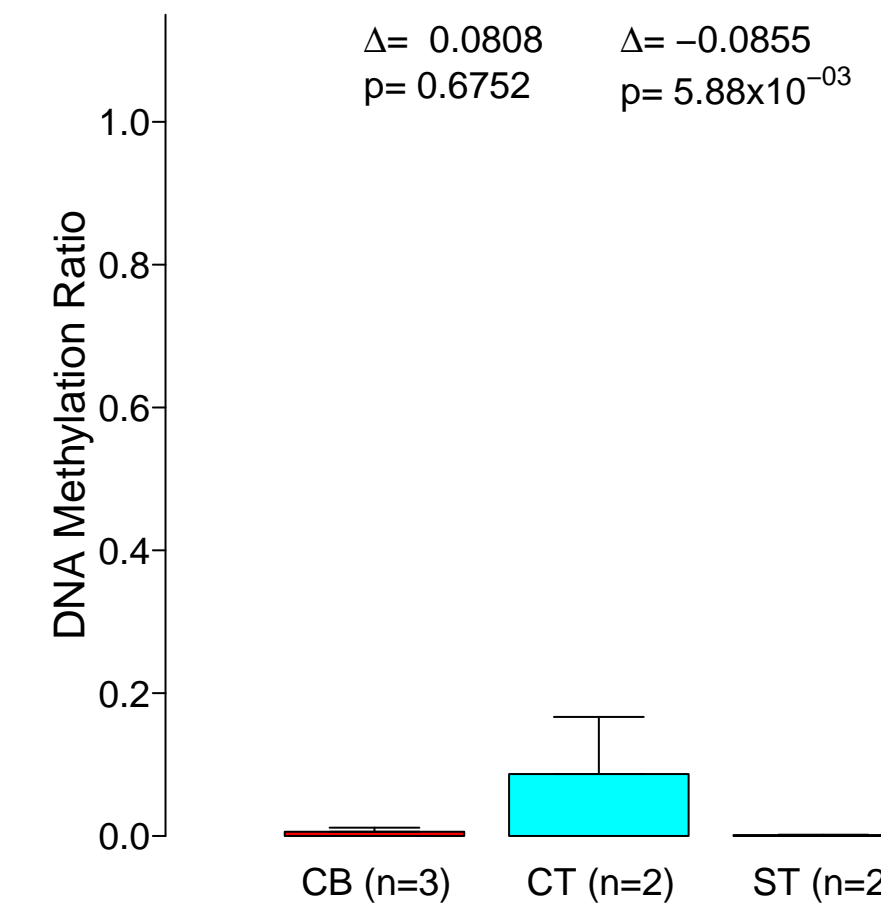

*BCL6* Chr3 187,459,707

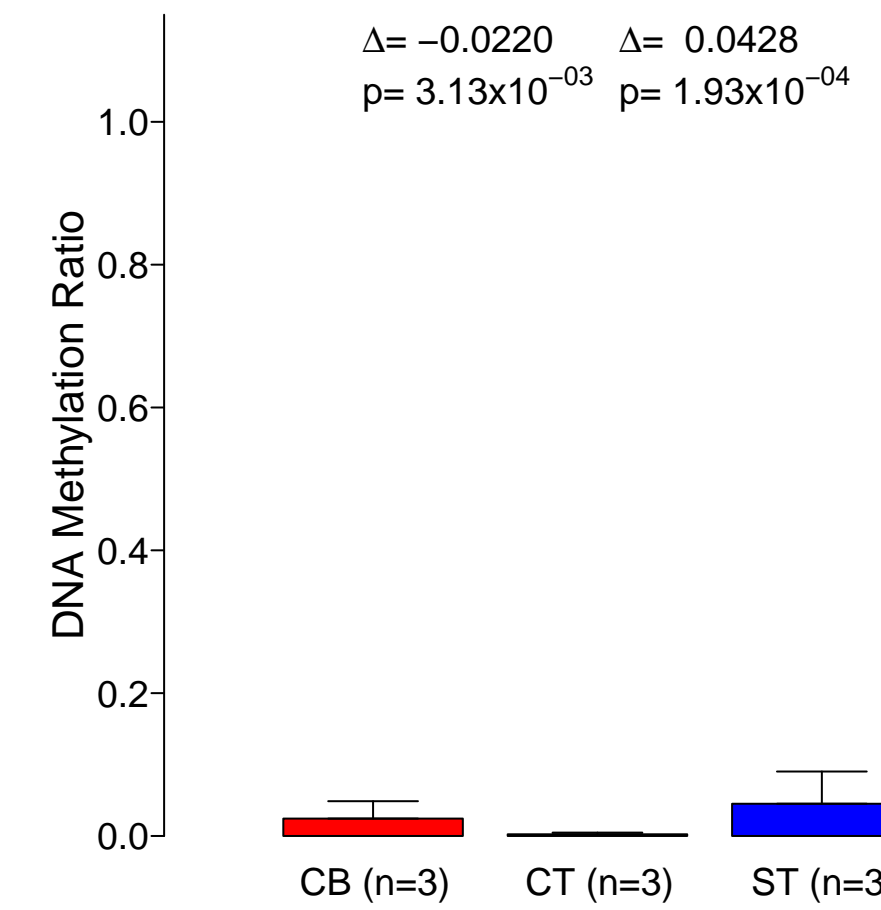

*BCL6* Chr3 187,459,718

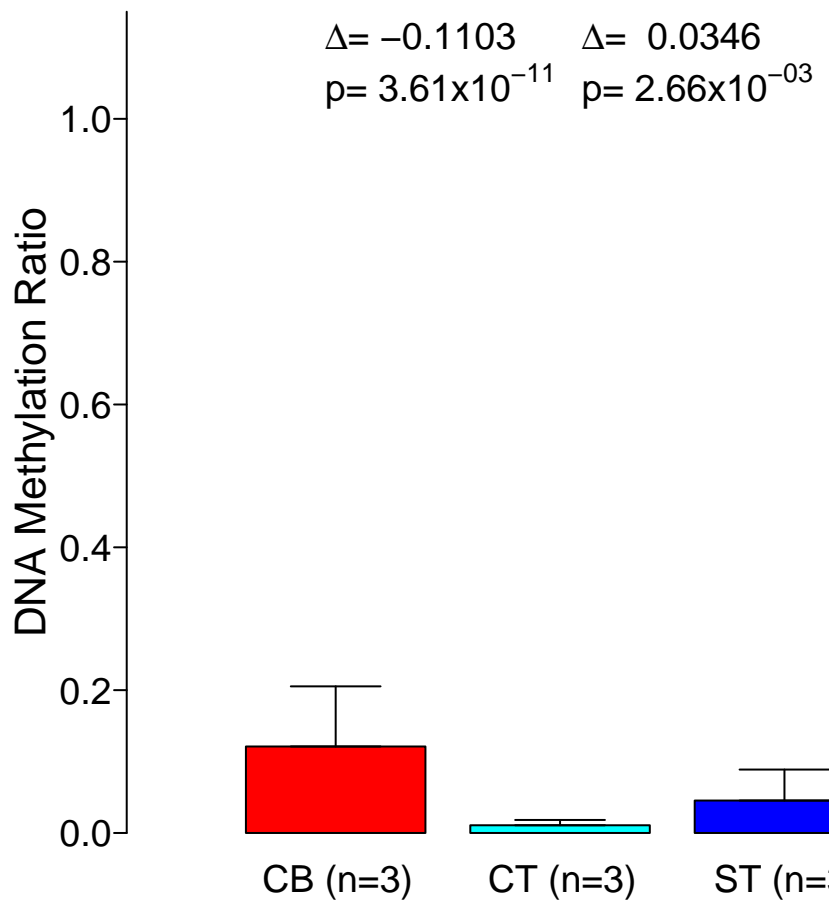

*BCL6* Chr3 187,459,790

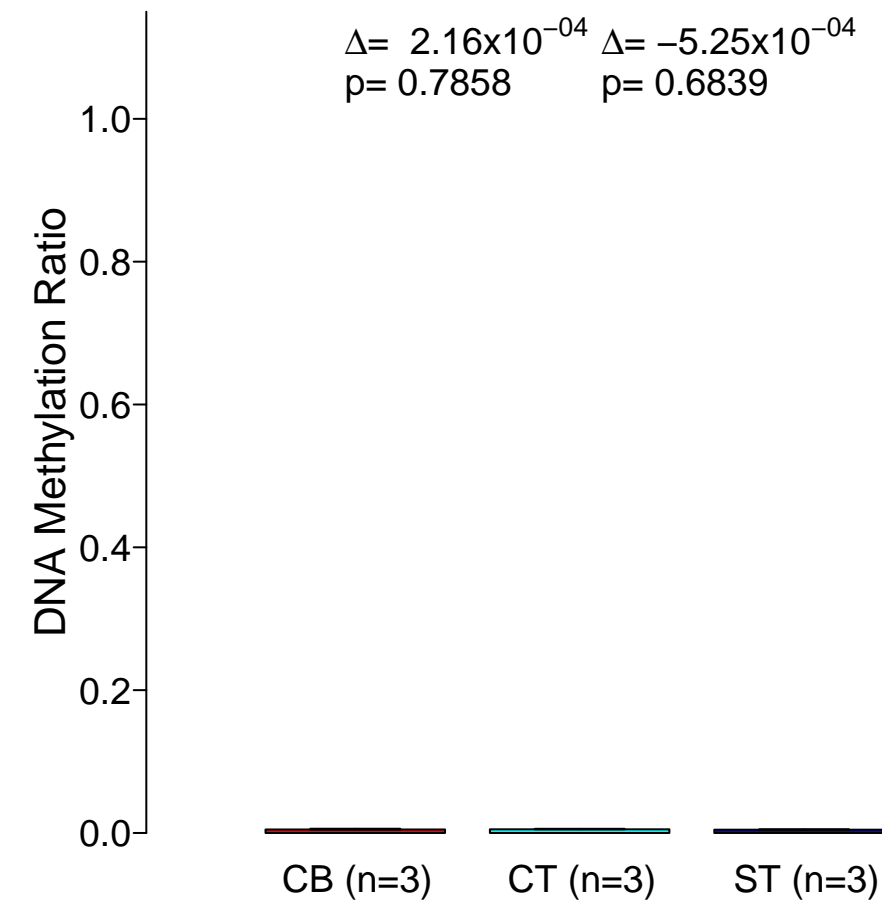

*BCL6* Chr3 187,459,870

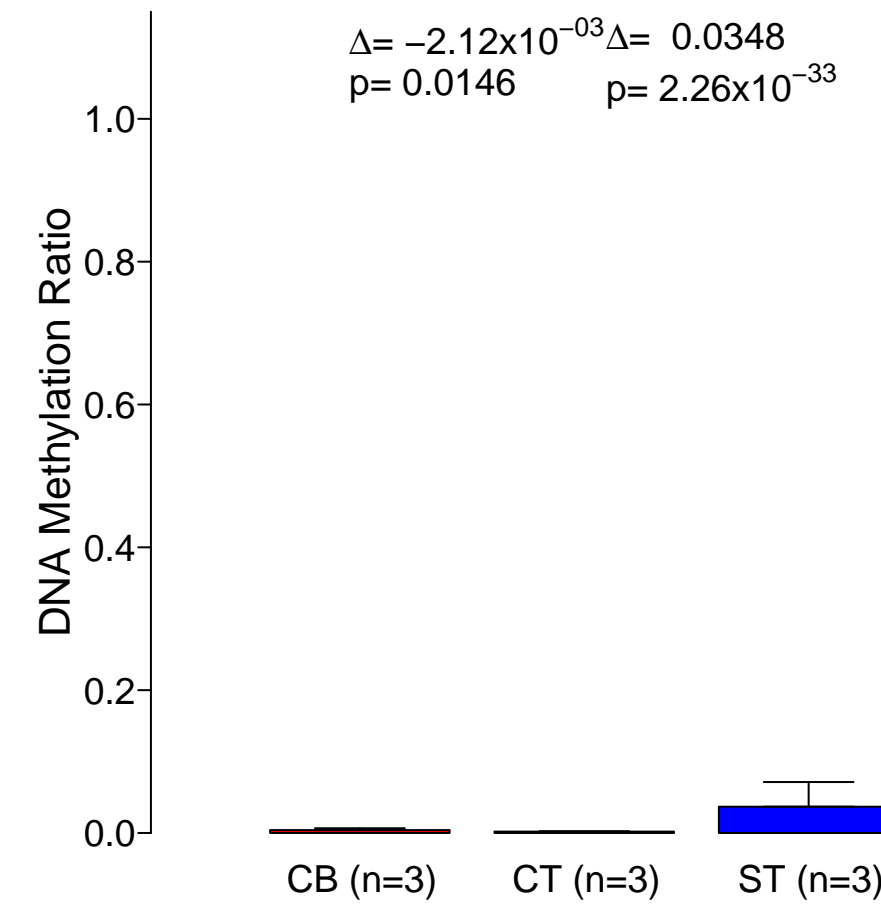

*BCL6* Chr3 187,459,979

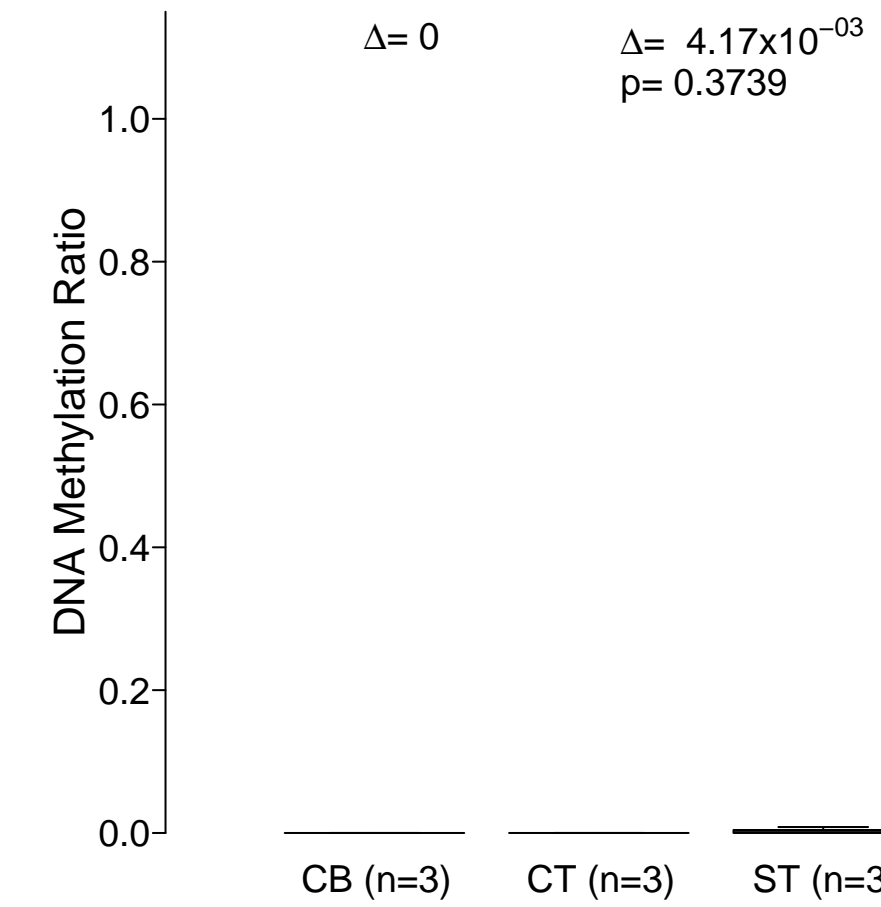

*BCL6* Chr3 187,459,989

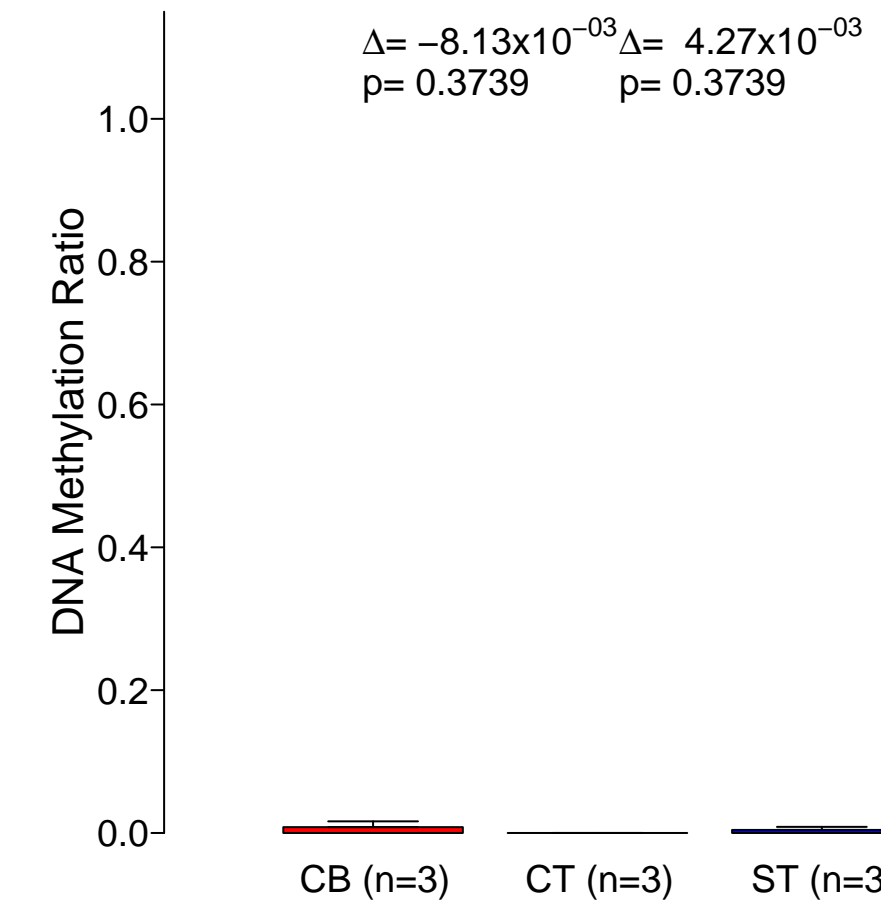

*BCL6* Chr3 187,460,000

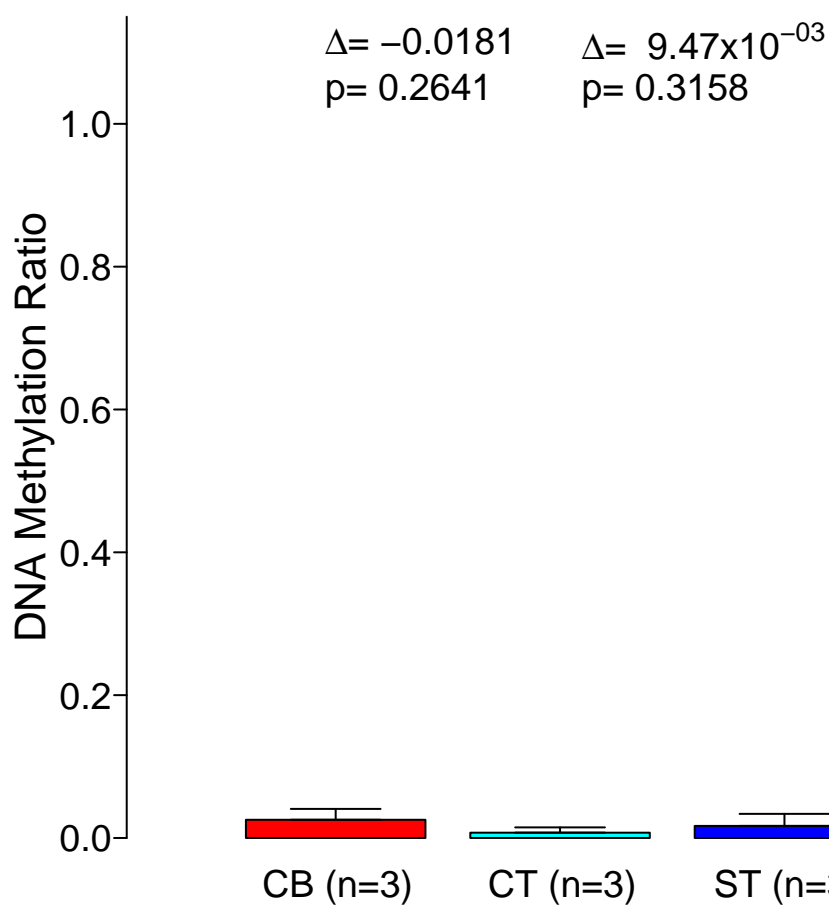

*BCL6* Chr3 187,460,098

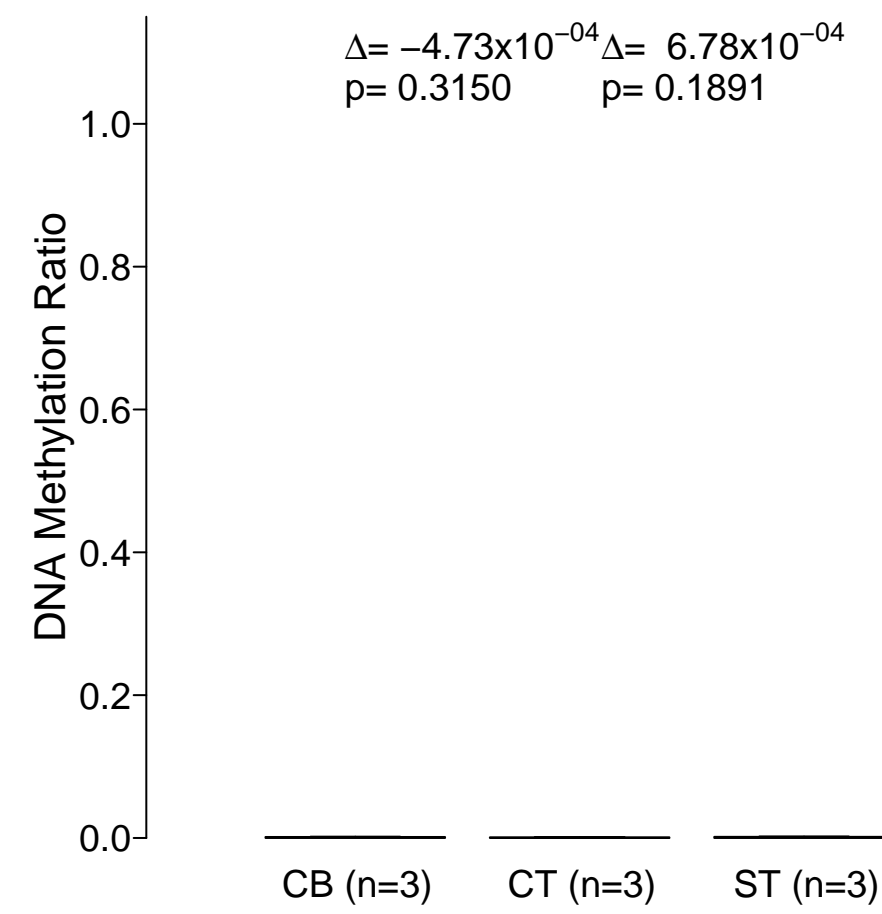

*BCL6* Chr3 187,460,151

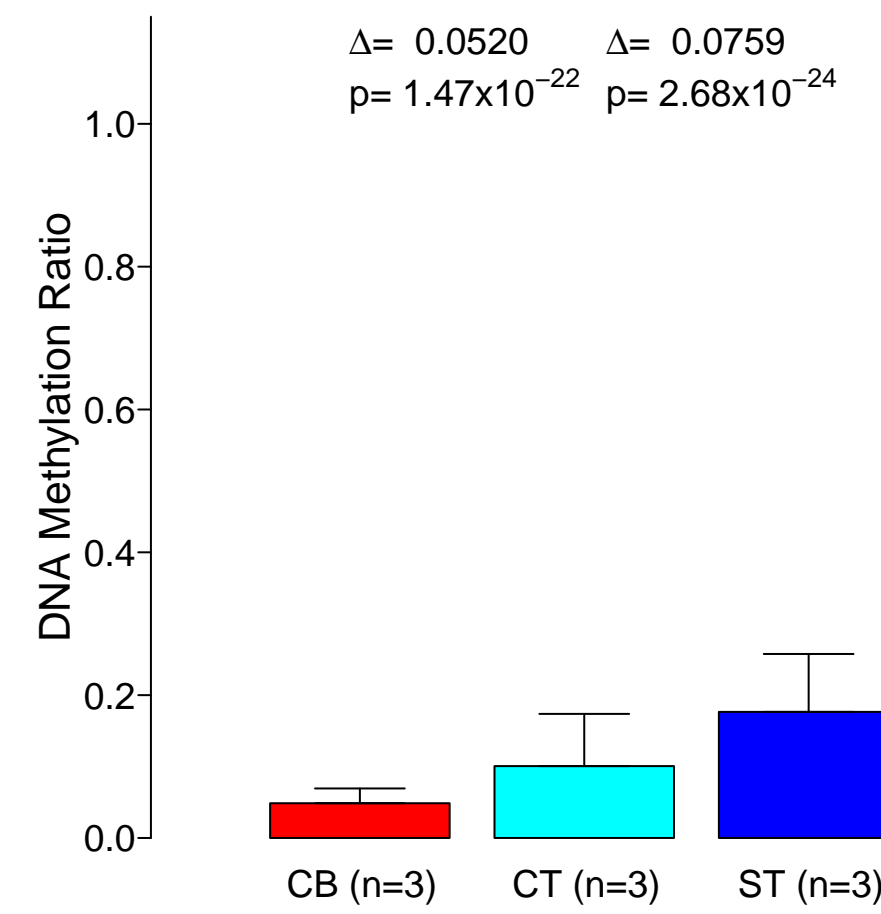

*BCL6* Chr3 187,460,304

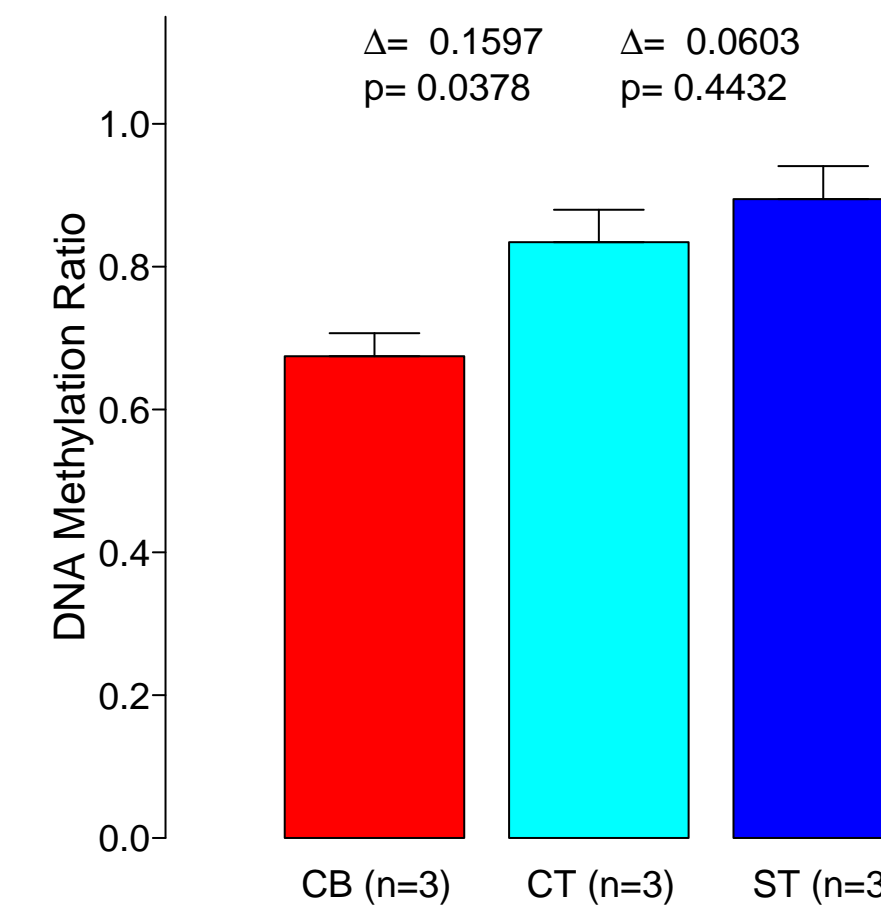

*BCL6* Chr3 187,460,374

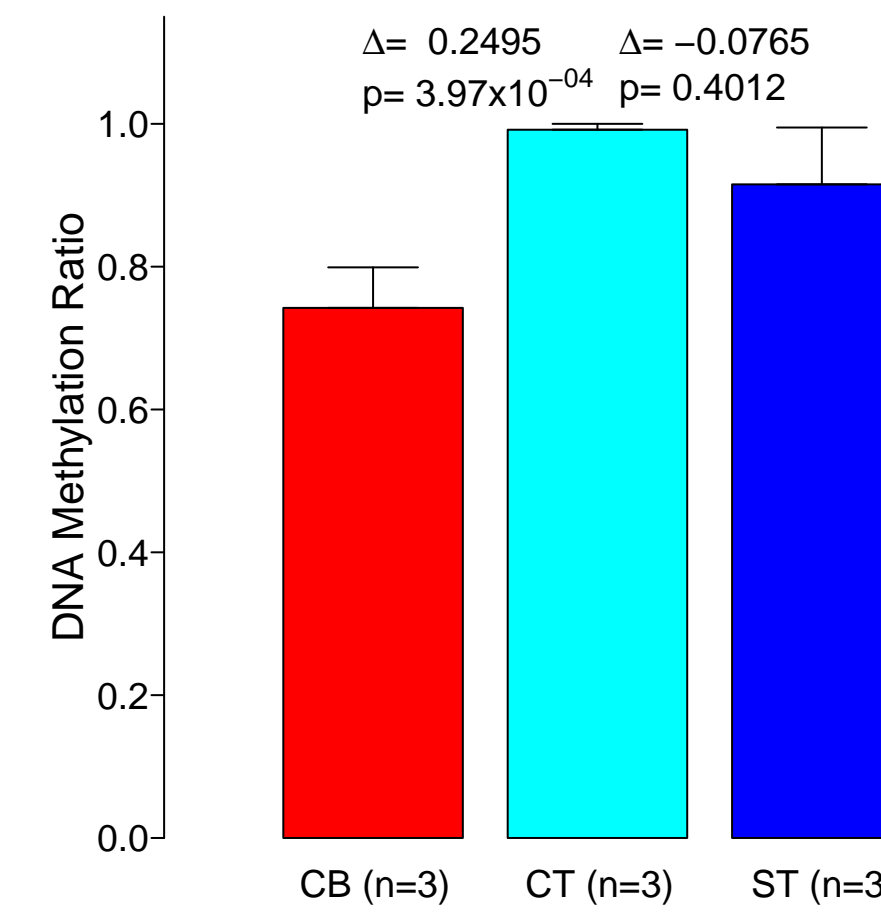

Supplement: Image_9.pdf [file Image_9.pdf]
