# Supplementary material for: Integrated Systems Biology Approach Identifies Novel Maternal and Placental Pathways of Preeclampsia
Source: PubMed Central journal article supplement (PMC6092567; doi:10.3389/fimmu.2018.01661), 2018-08-08

*BCL6* Chr3 187,456,131

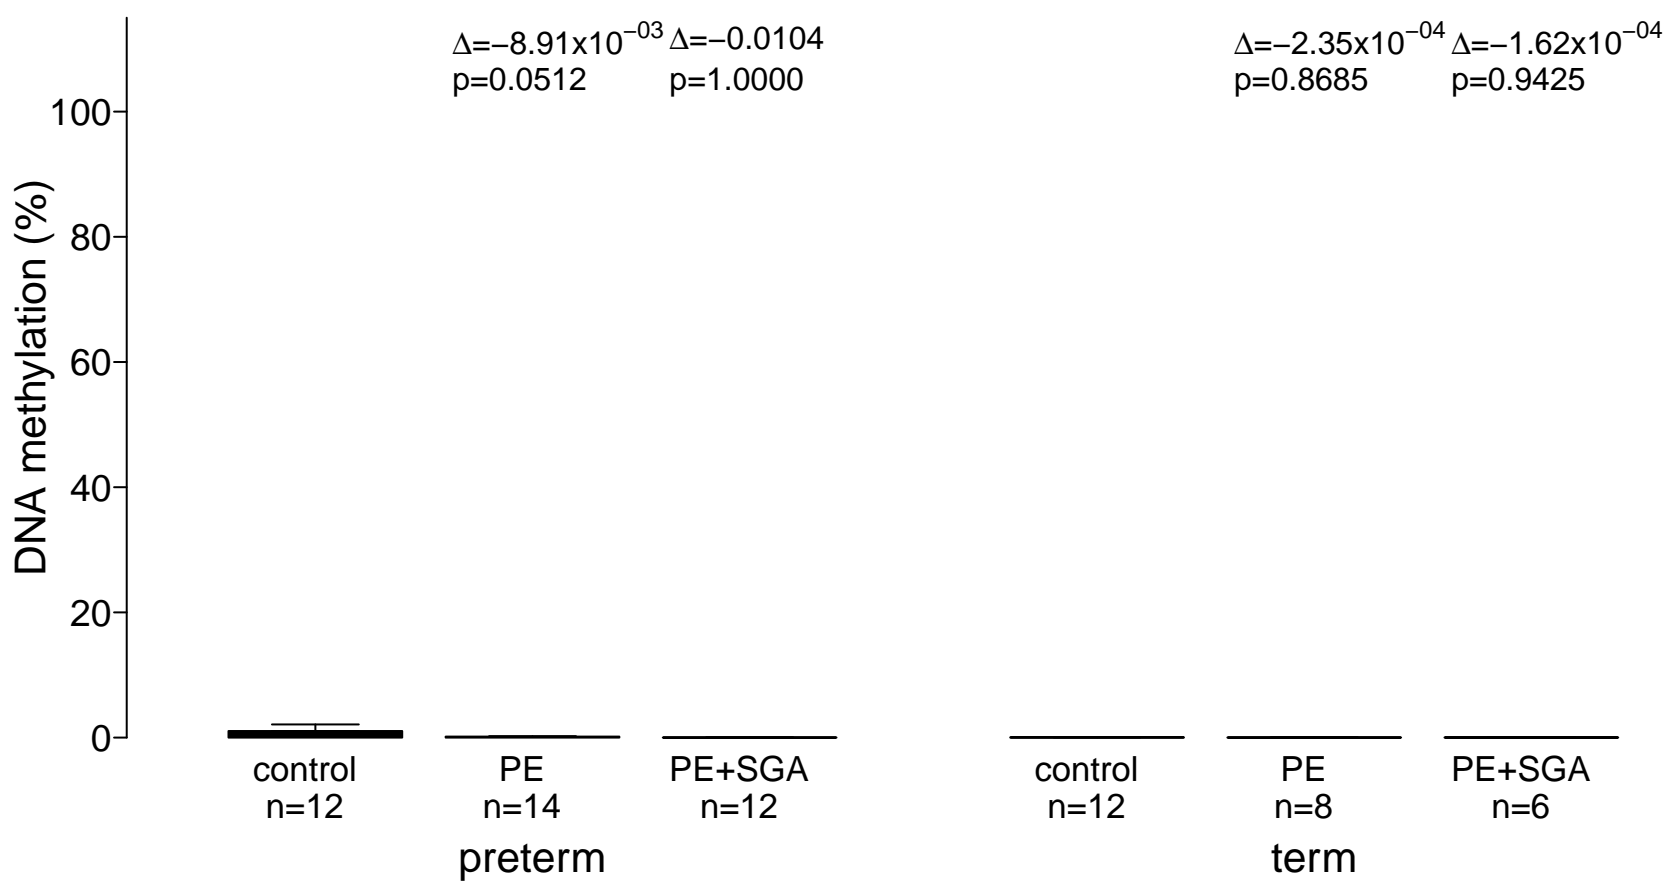

*BCL6* Chr3 187,456,175

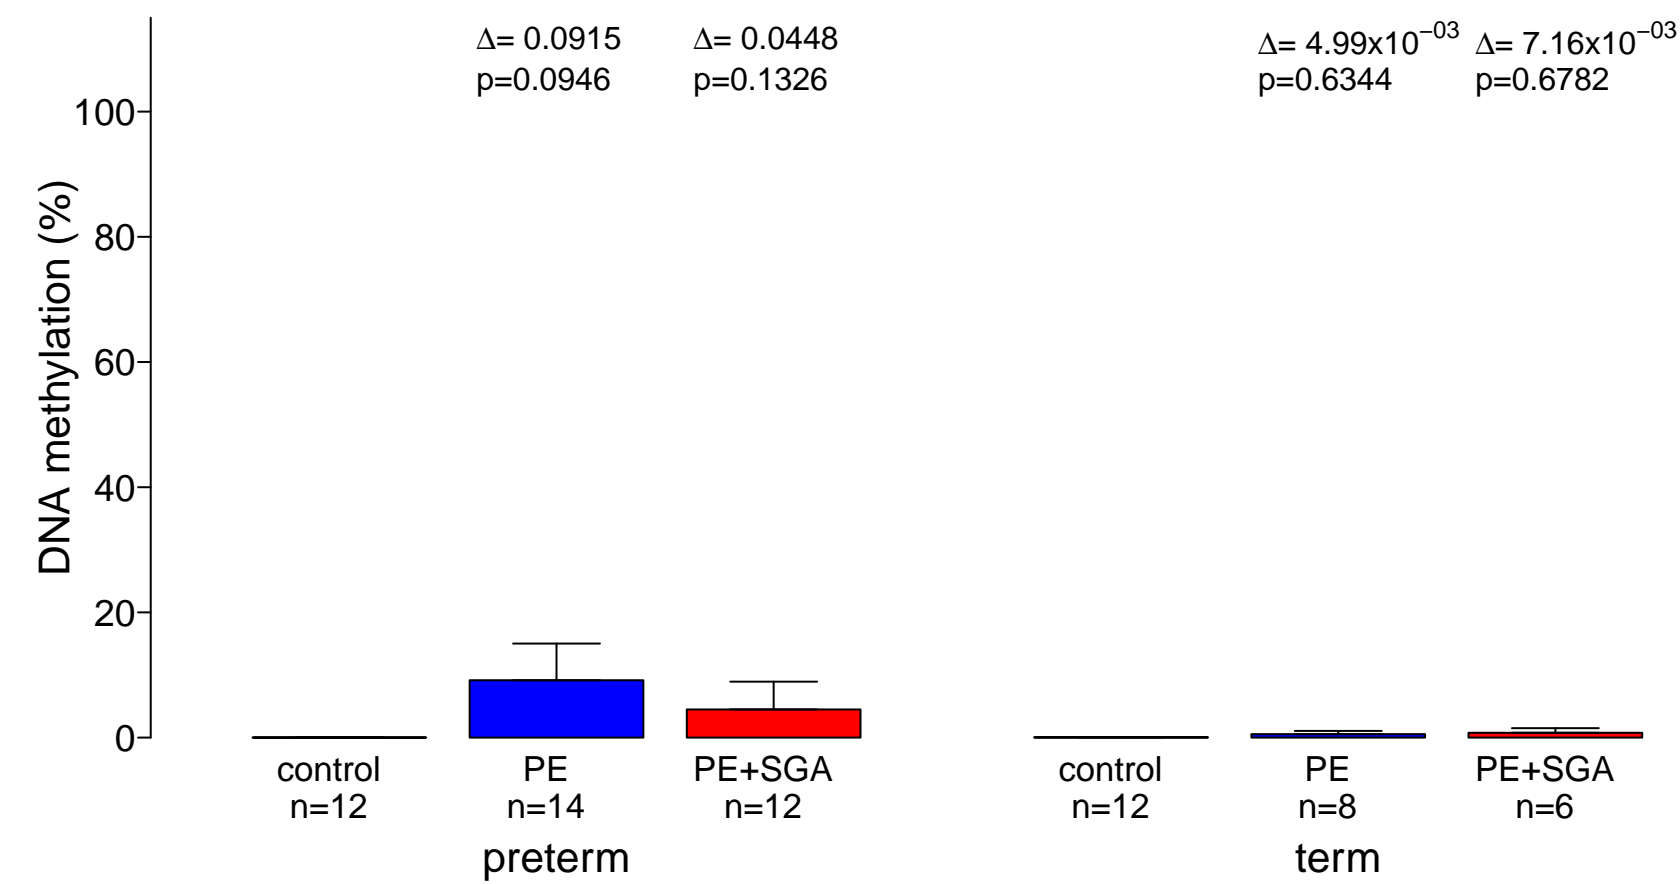

*BCL6* Chr3 187,456,181

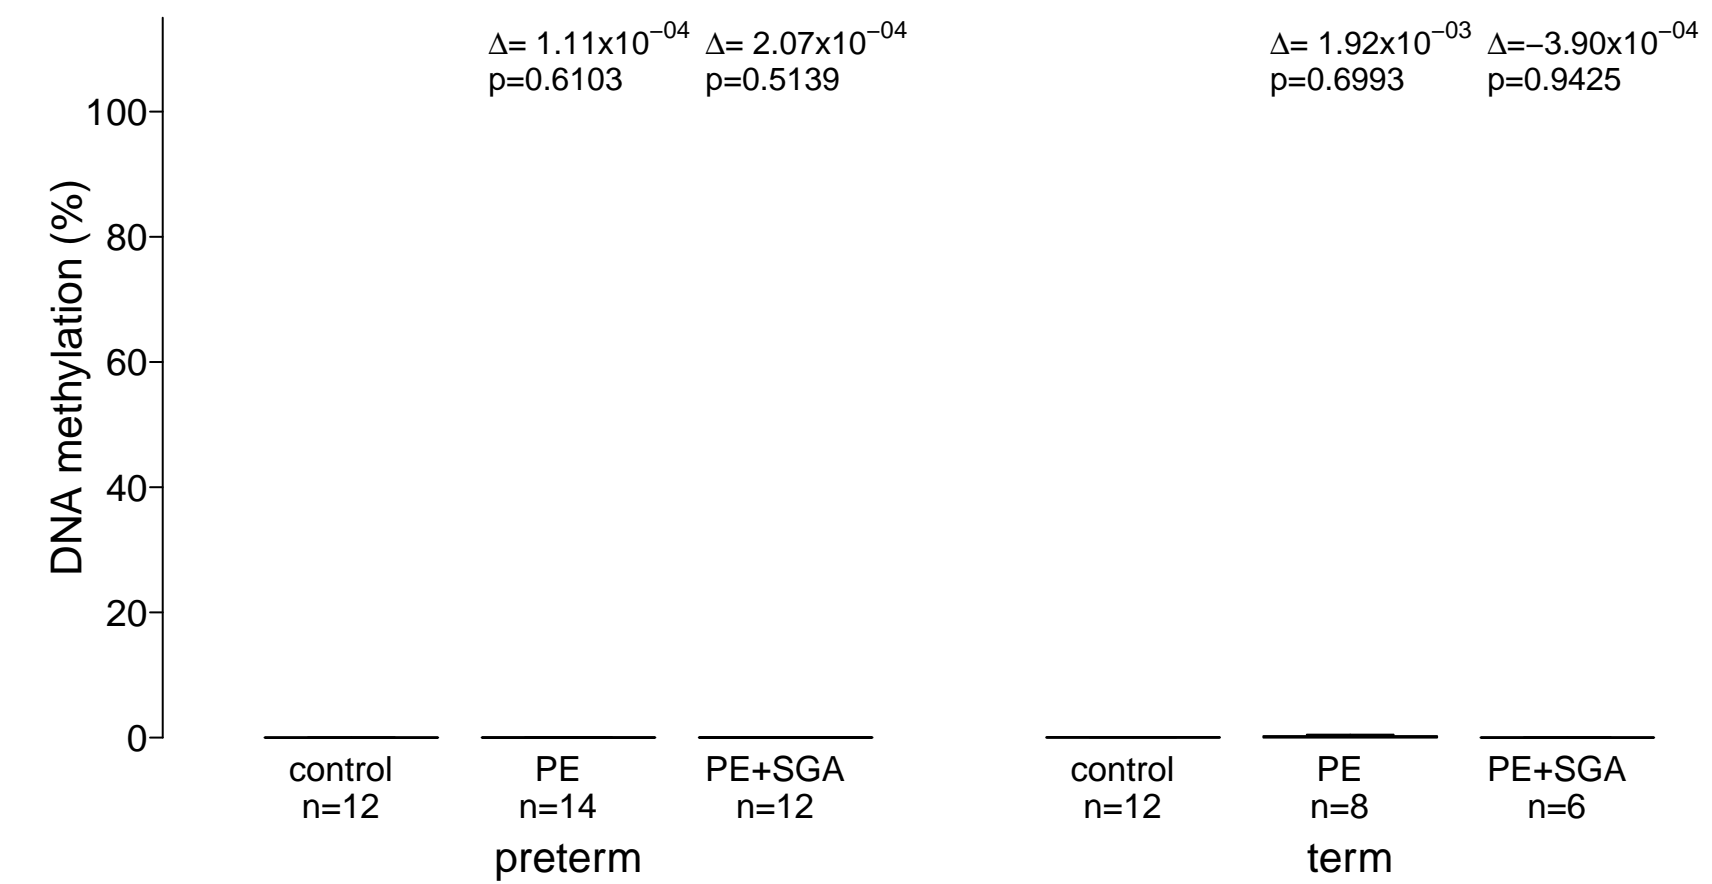

*BCL6* Chr3 187,456,193

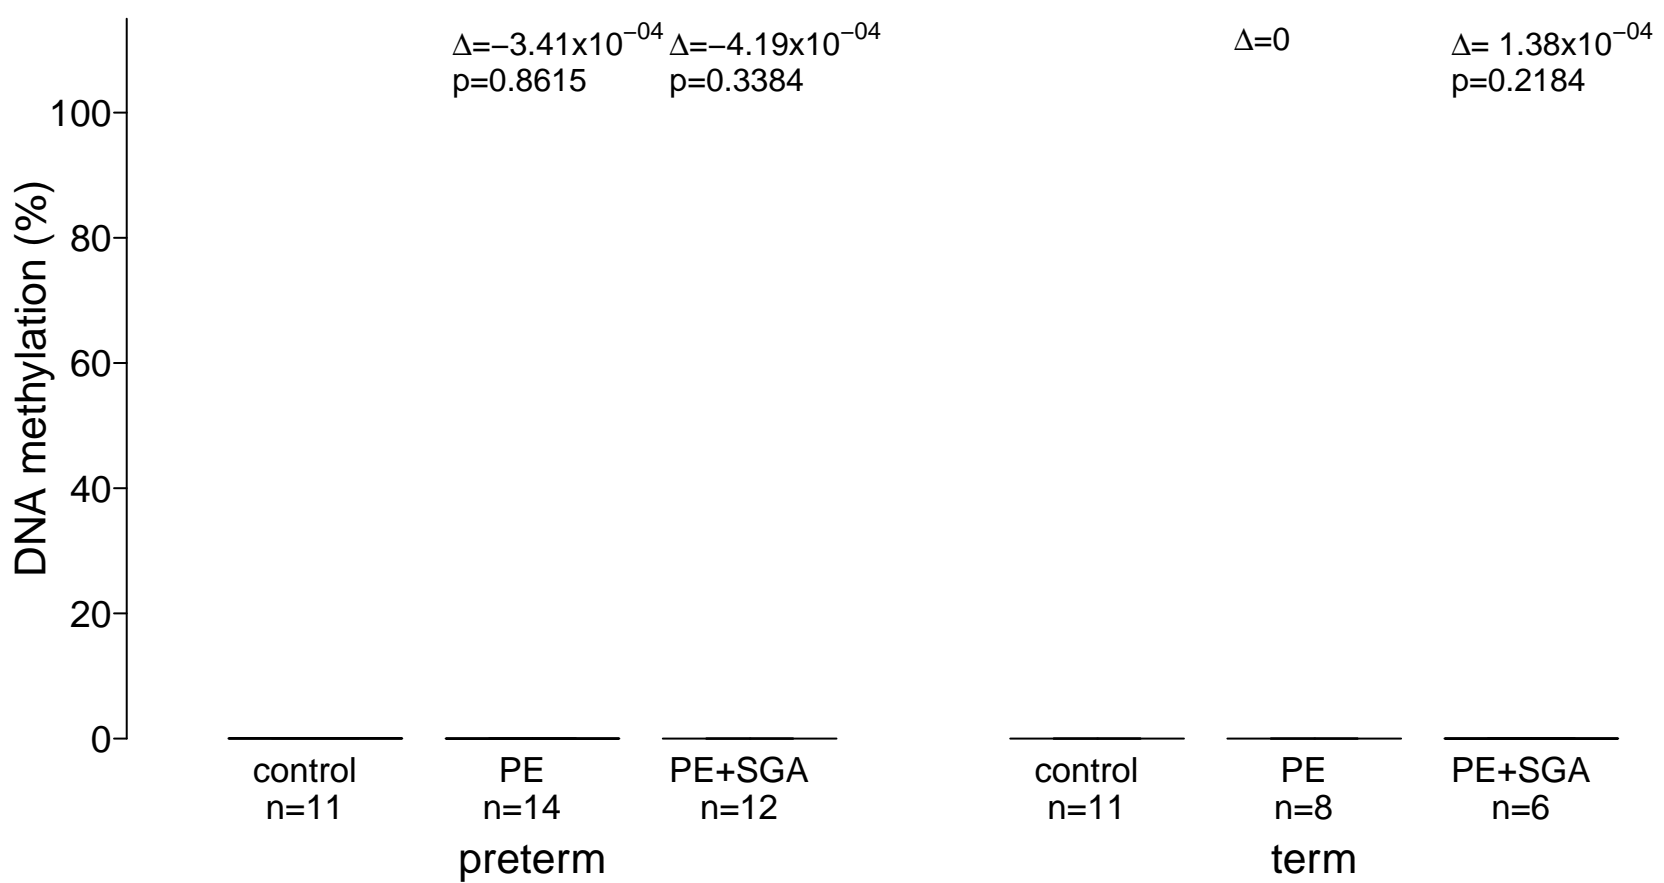

*BCL6* Chr3 187,456,218

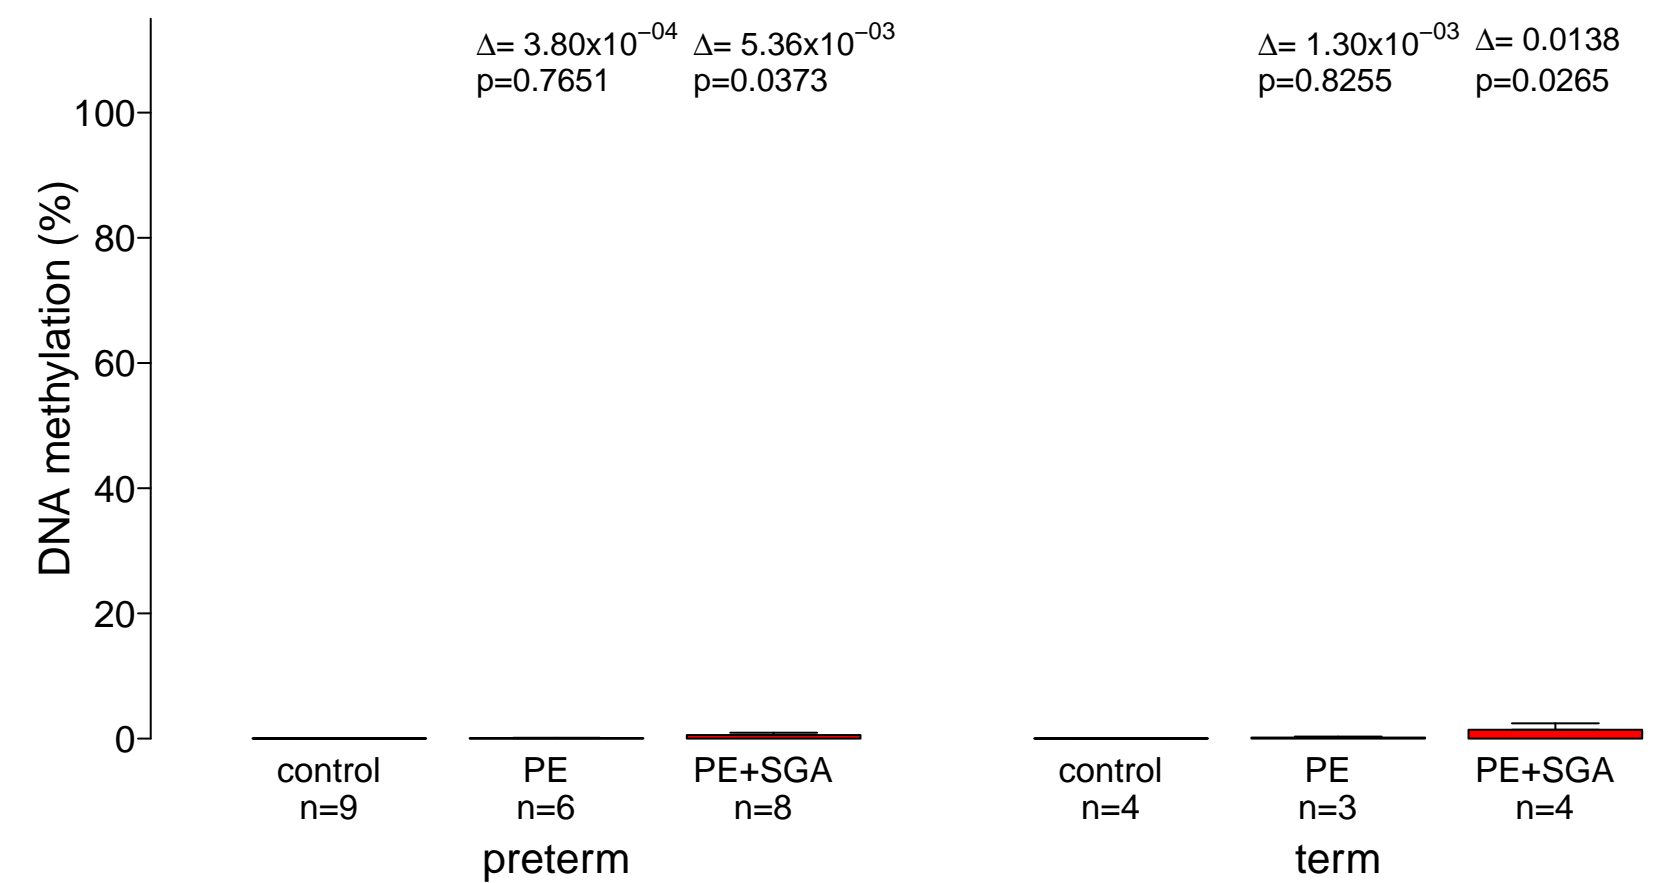

*BCL6* Chr3 187,456,251

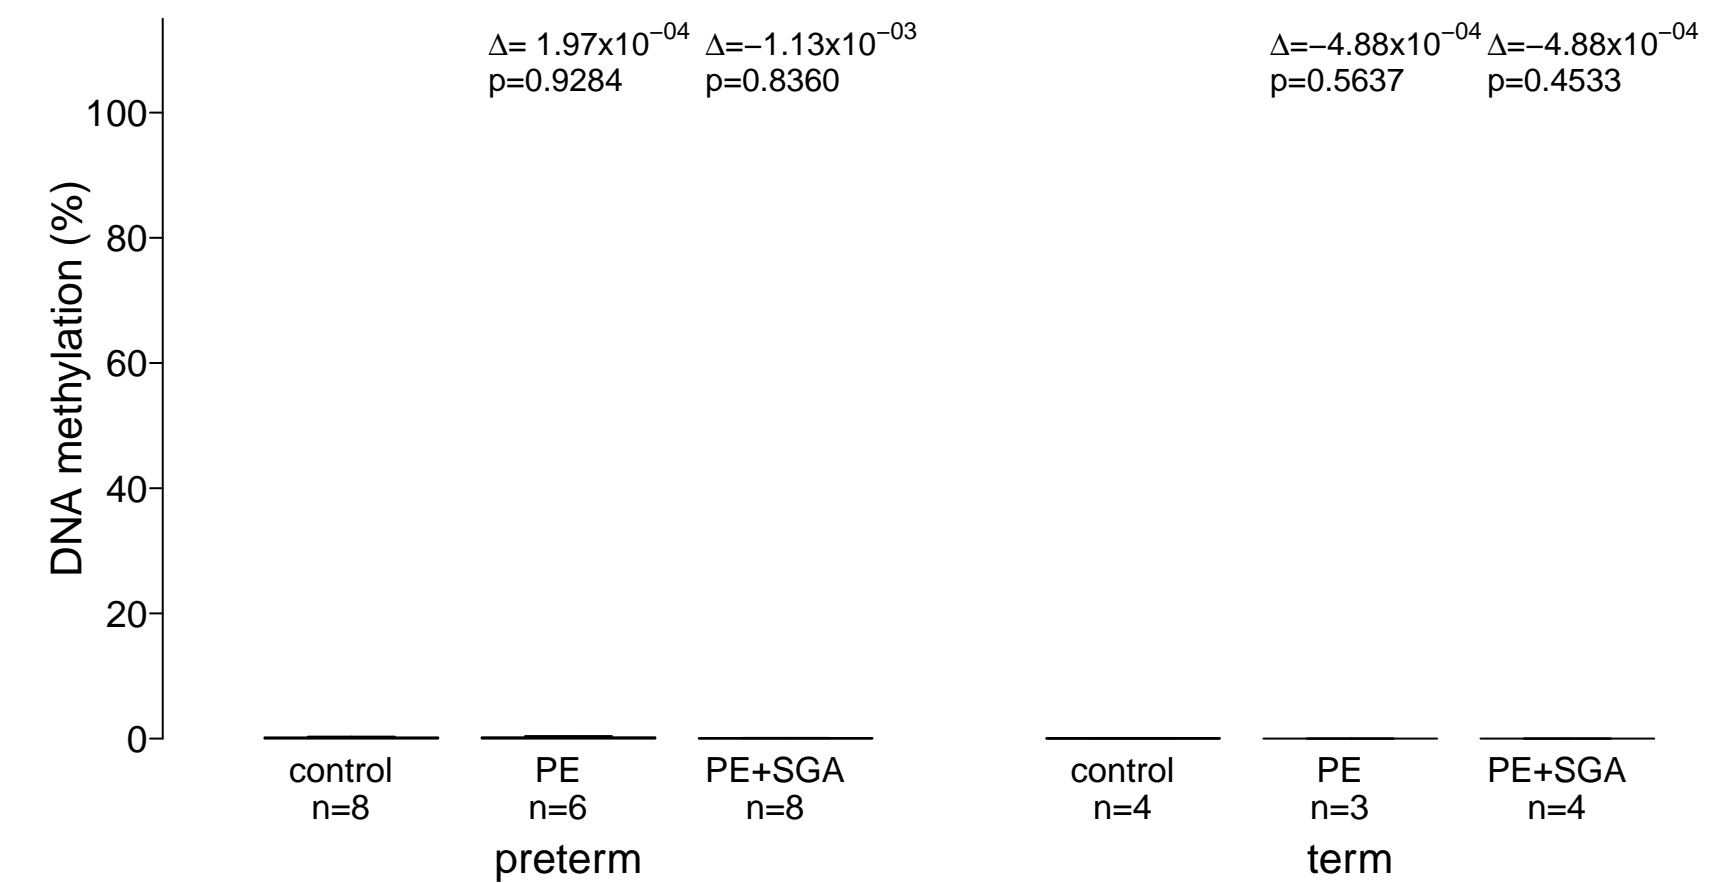

*BCL6* Chr3 187,456,263

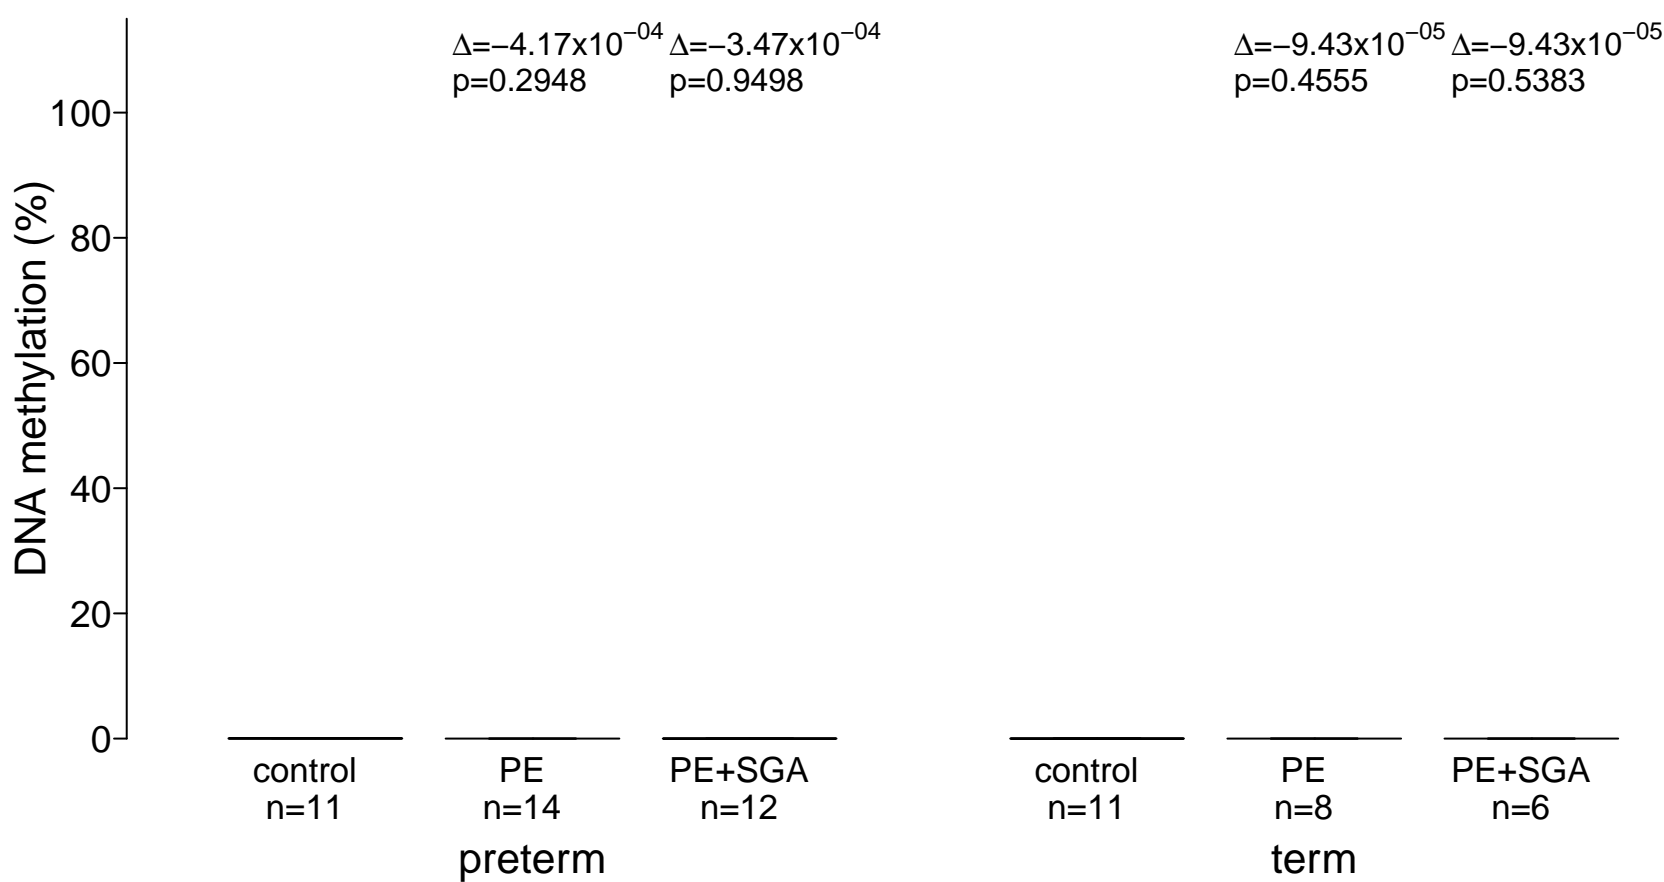

*BCL6* Chr3 187,456,269

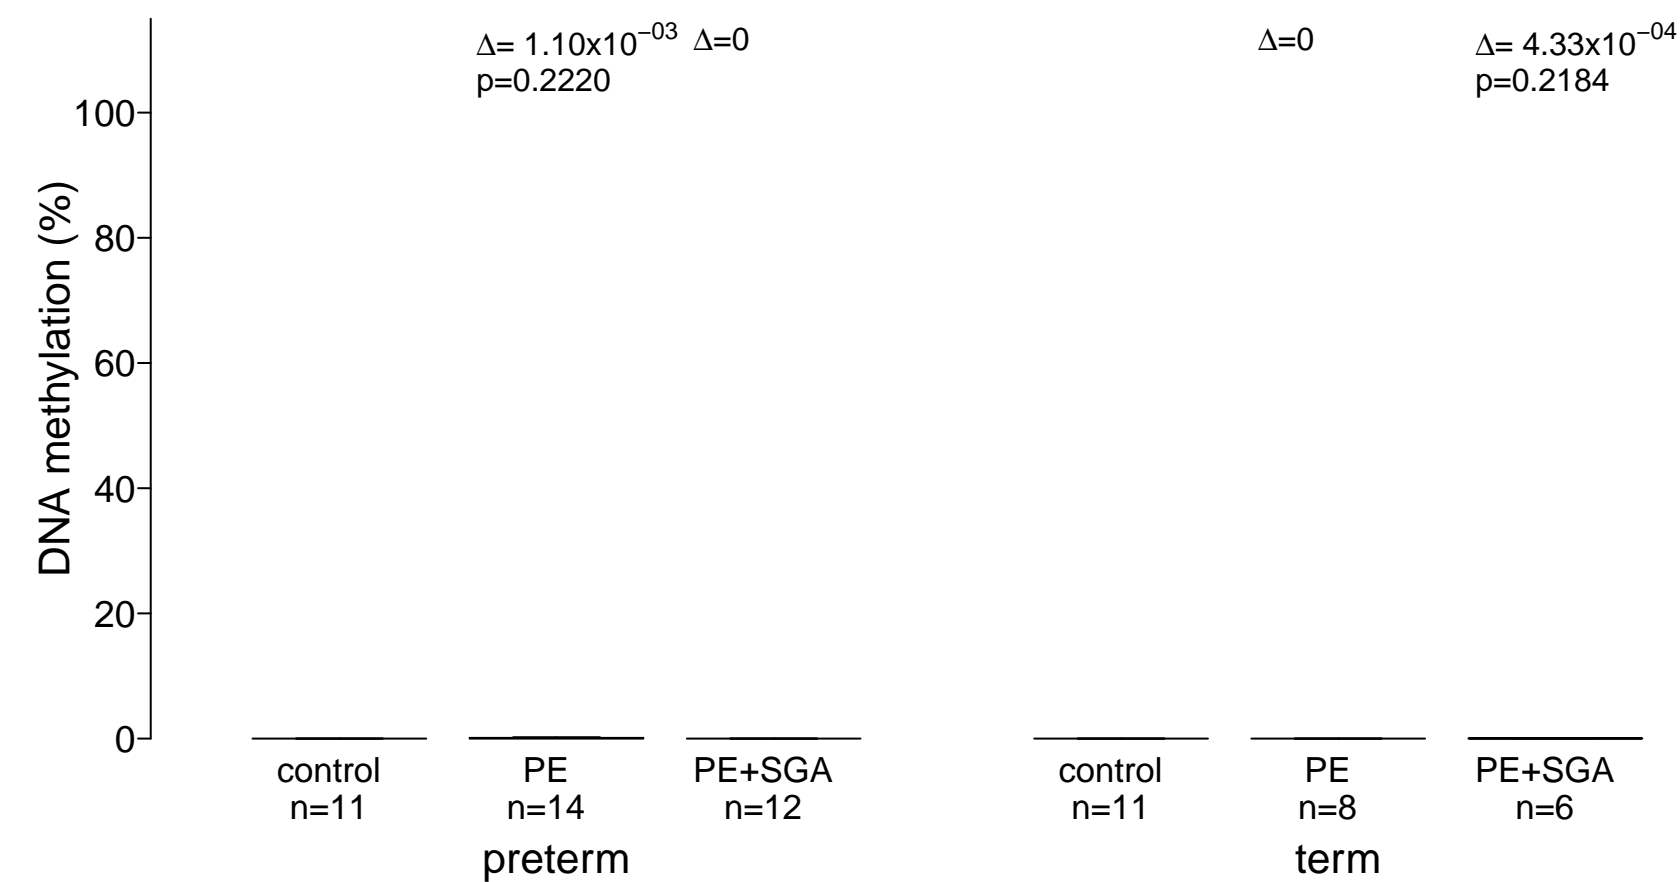

*BCL6* Chr3 187,456,278

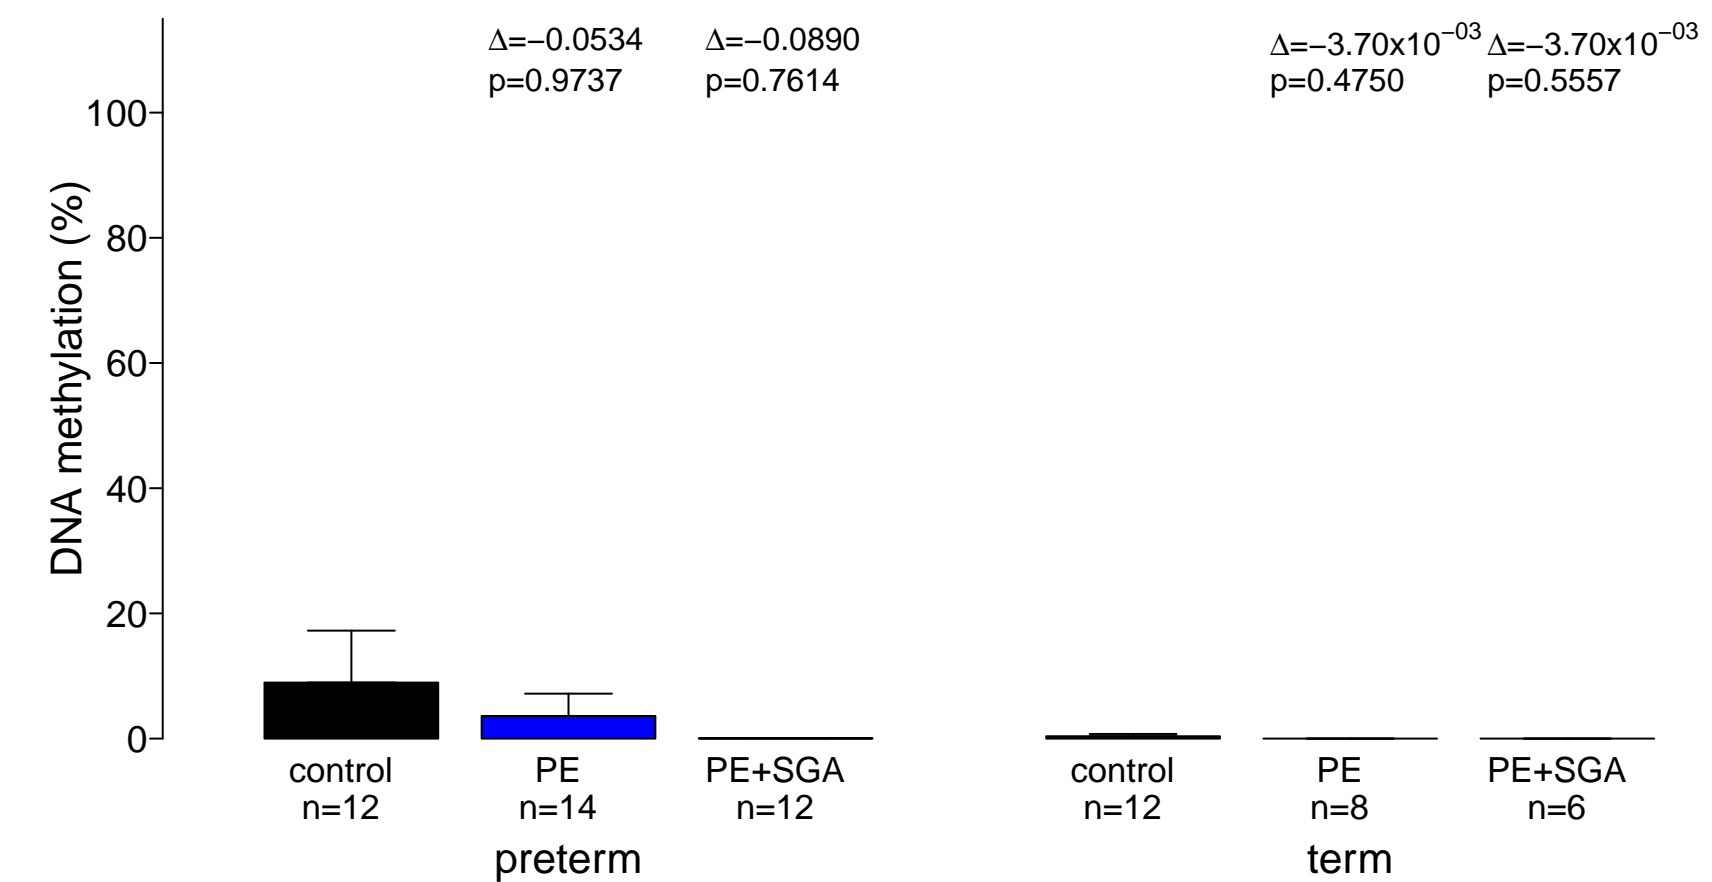

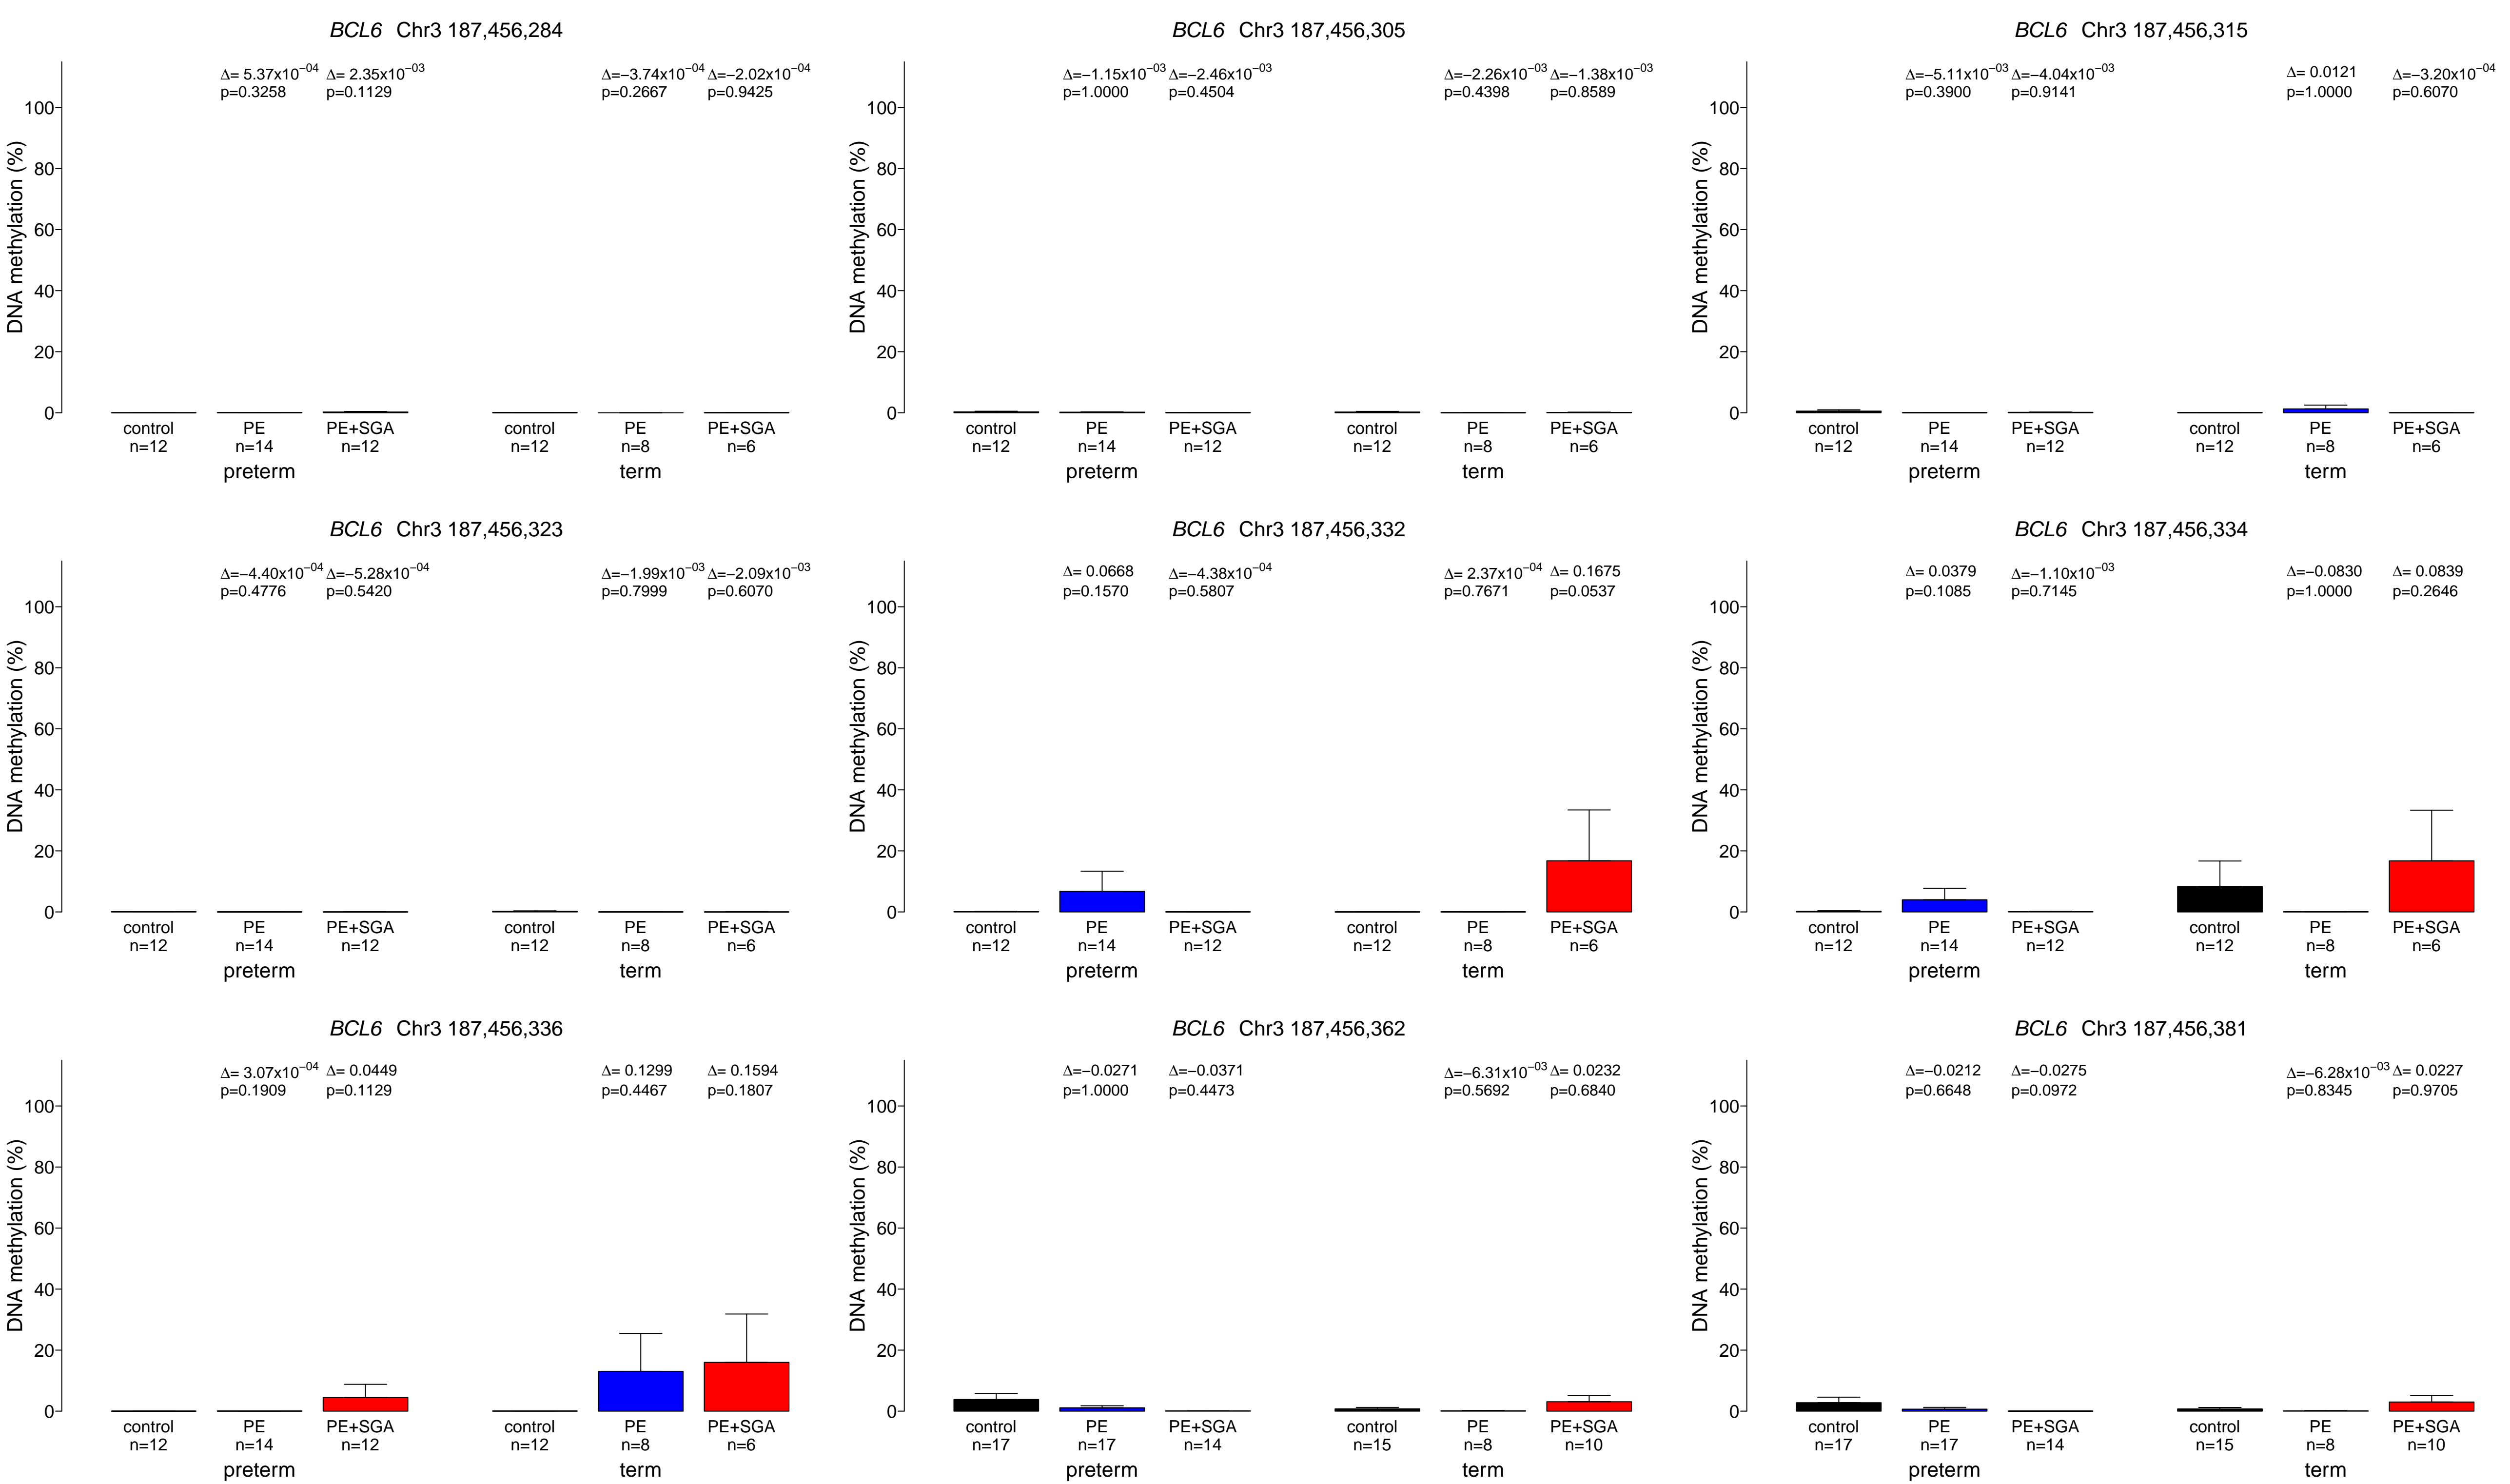

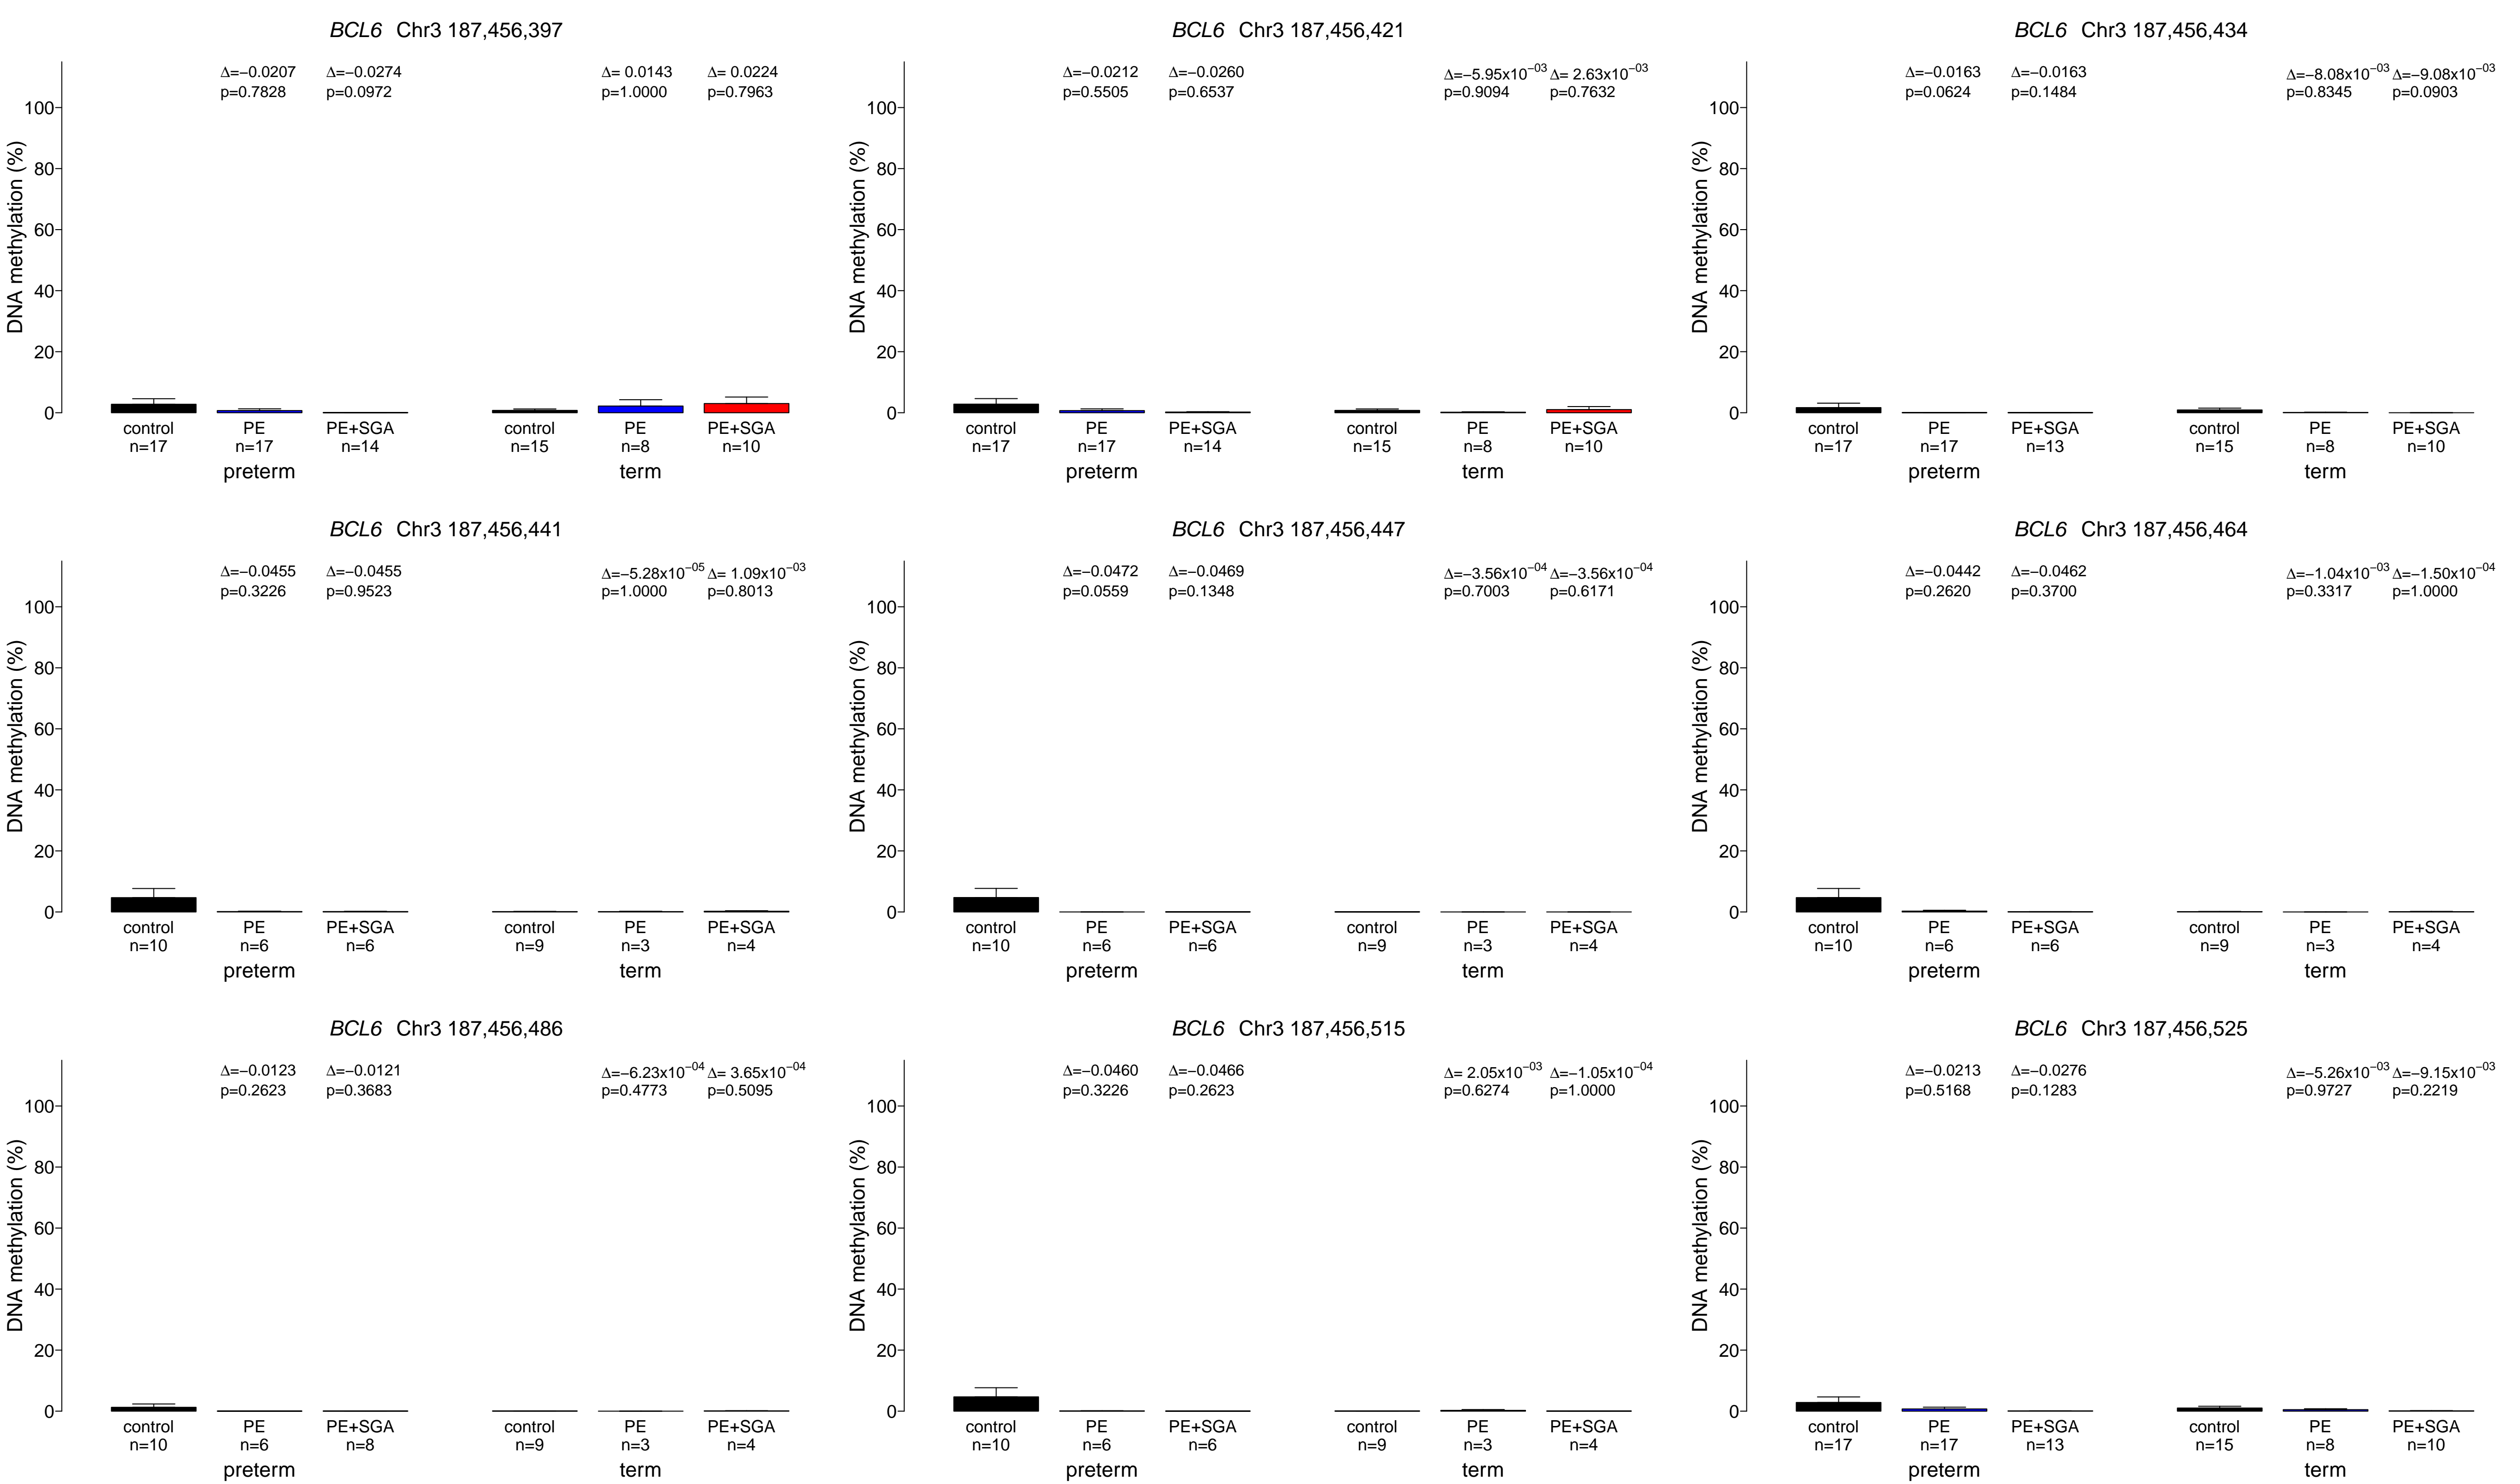

*BCL6* Chr3 187,456,528

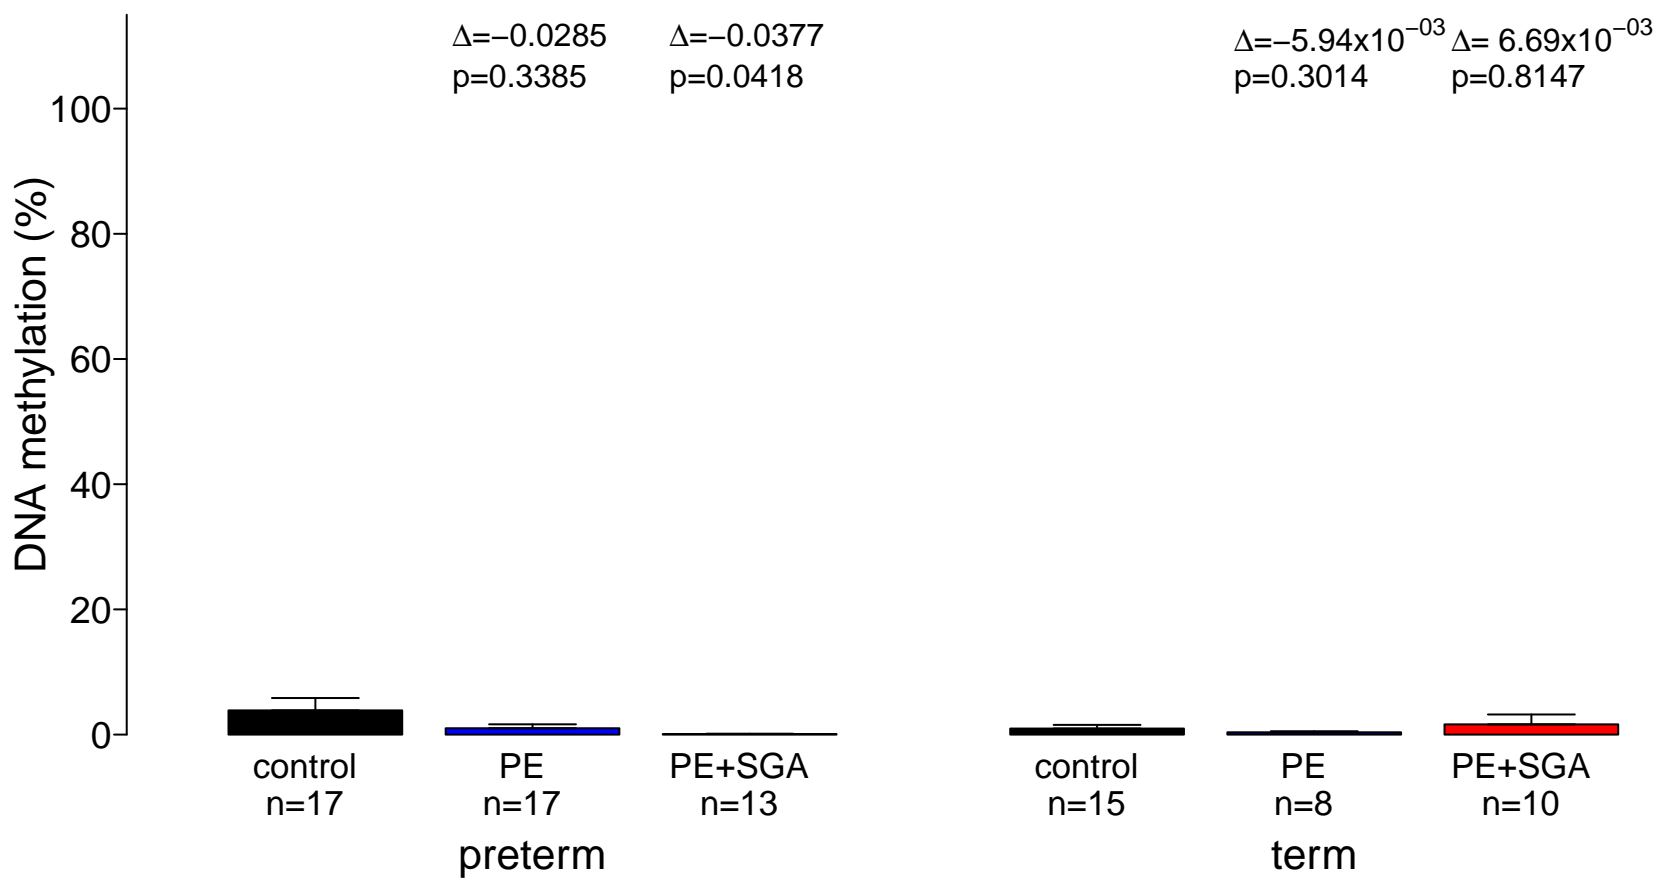

*BCL6* Chr3 187,456,543

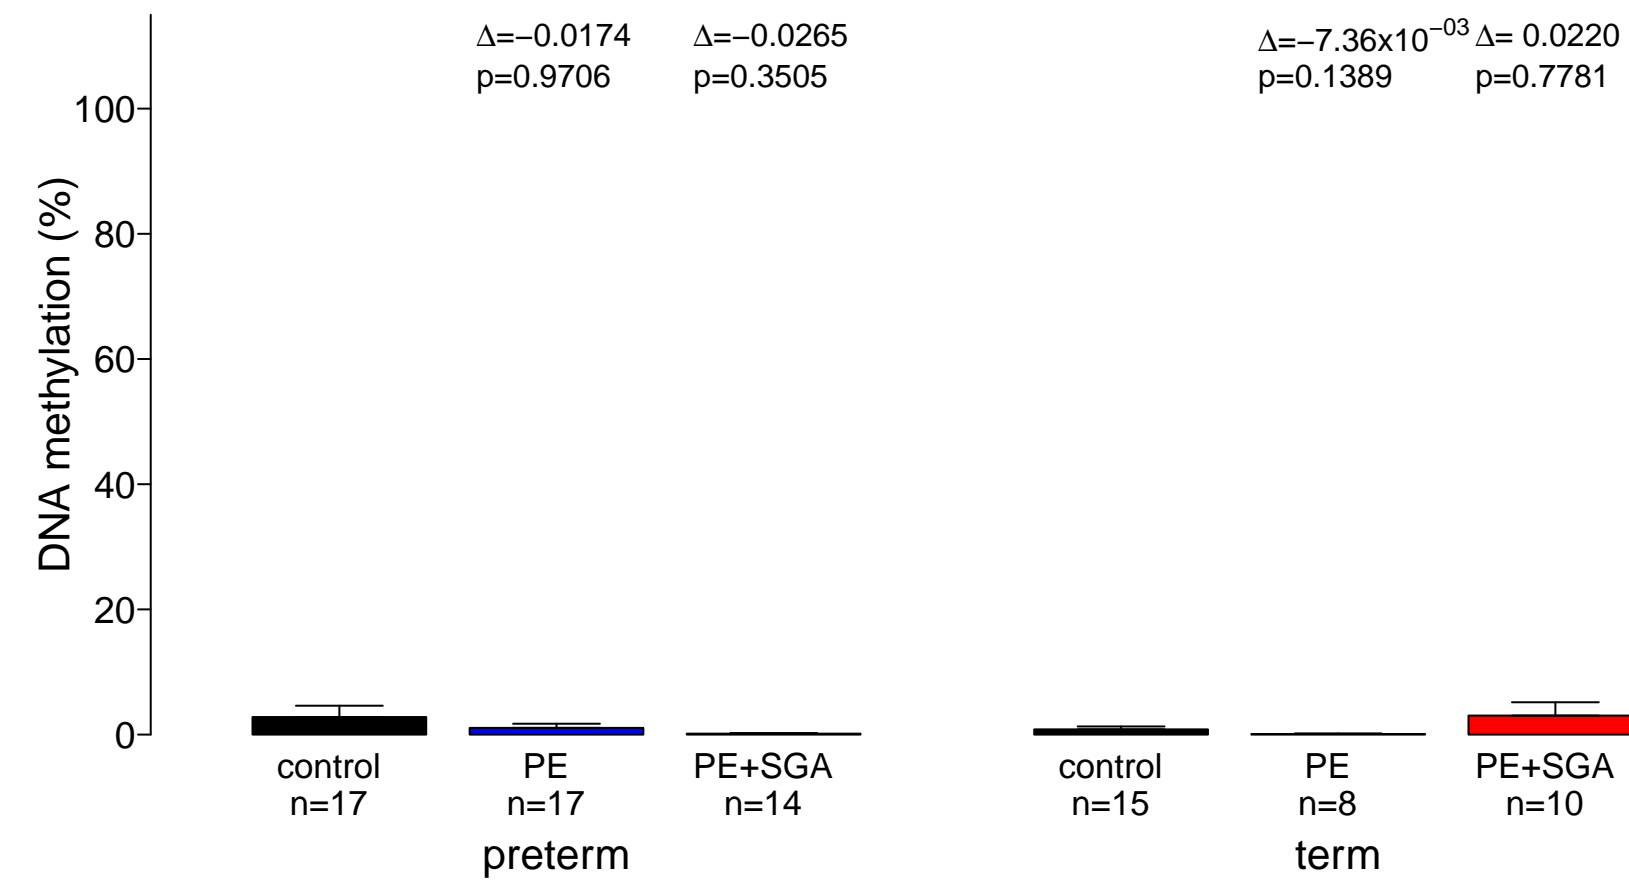

*BCL6* Chr3 187,456,550

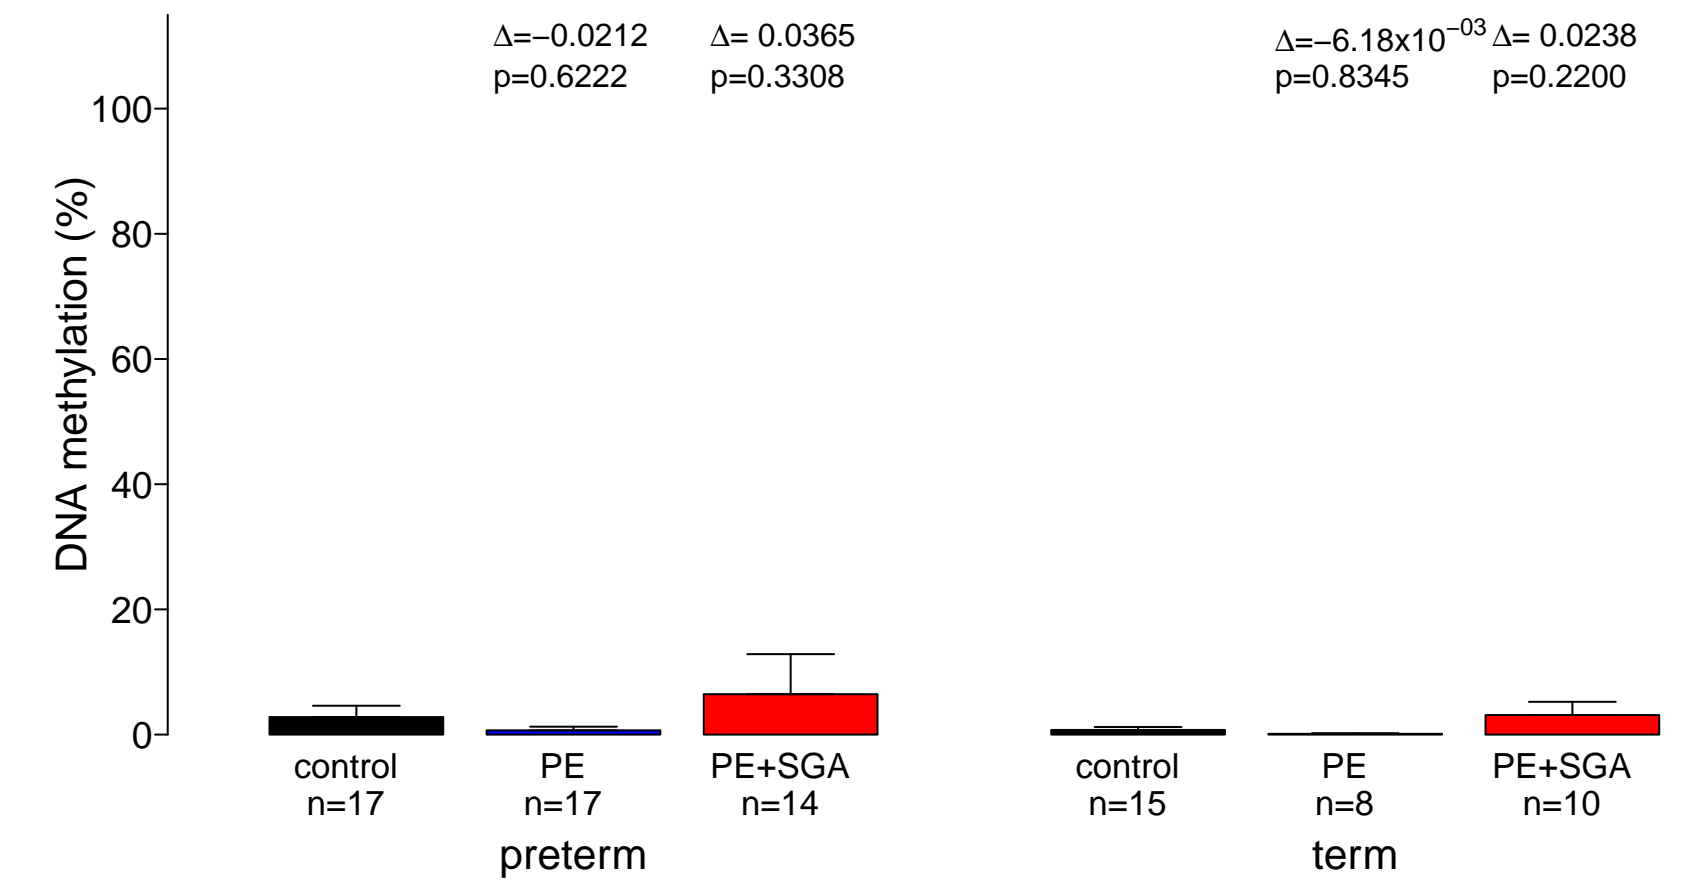

*BCL6* Chr3 187,456,565

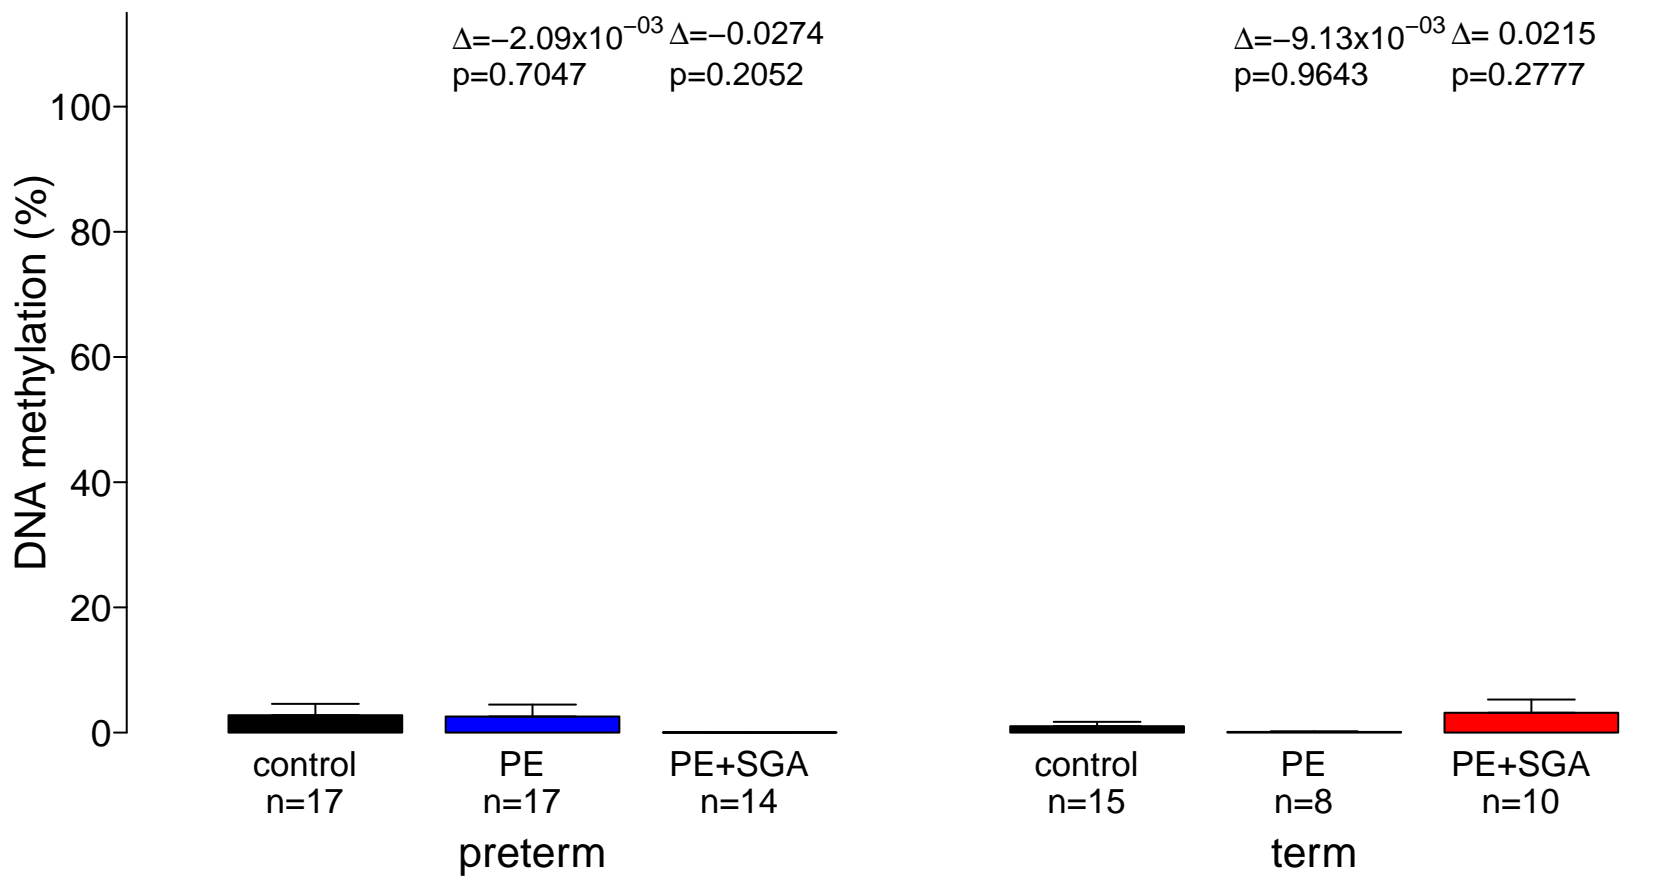

*BCL6* Chr3 187,456,579

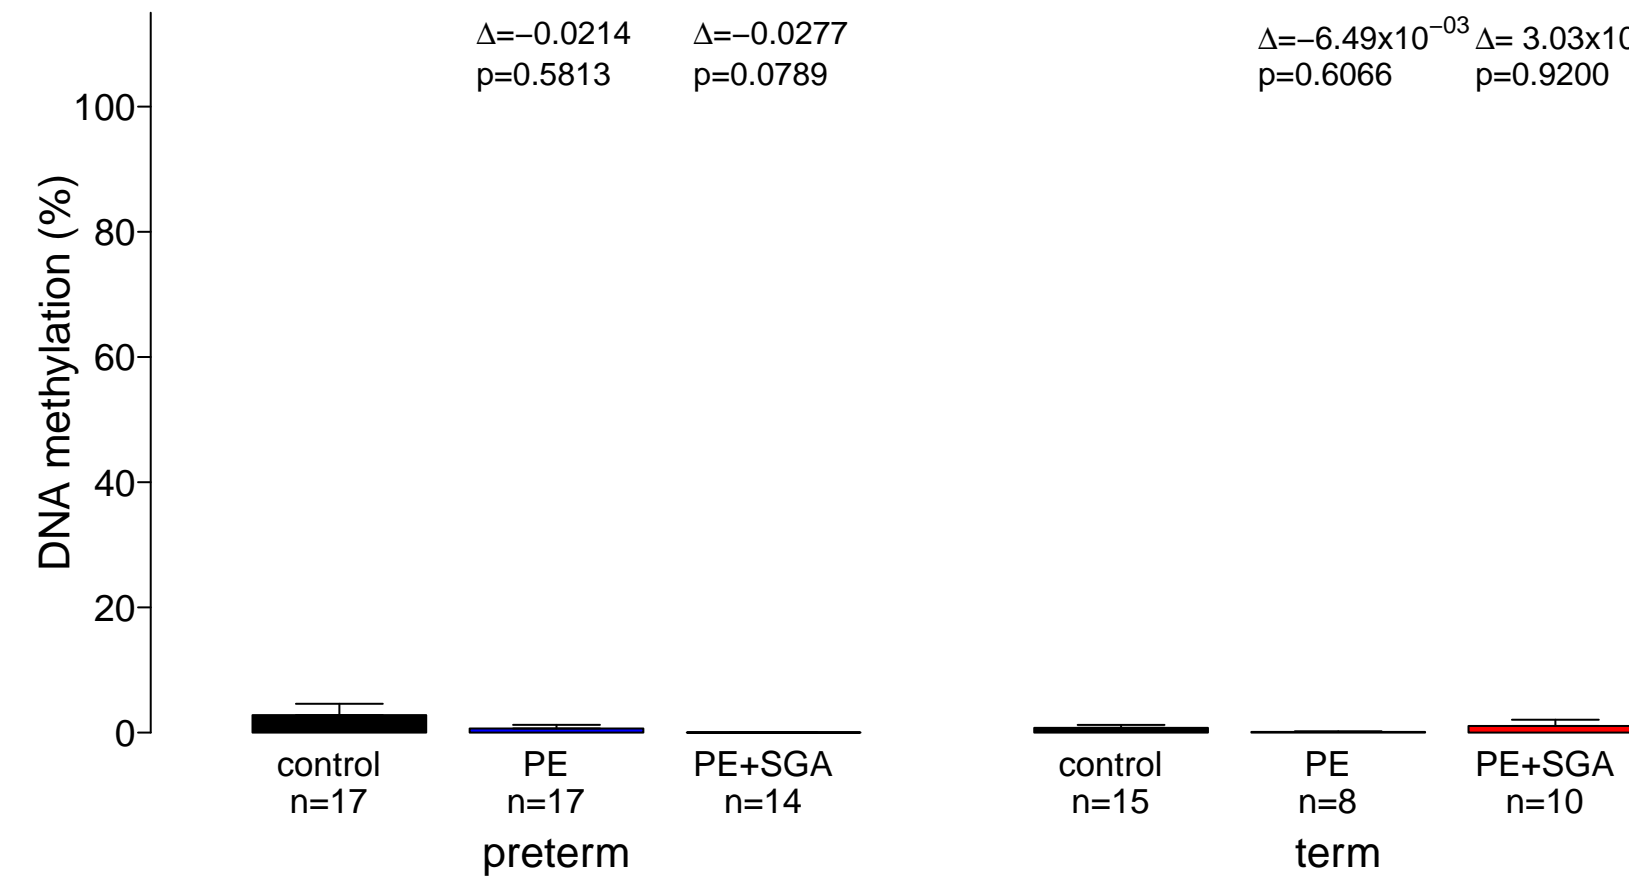

*BCL6* Chr3 187,456,625

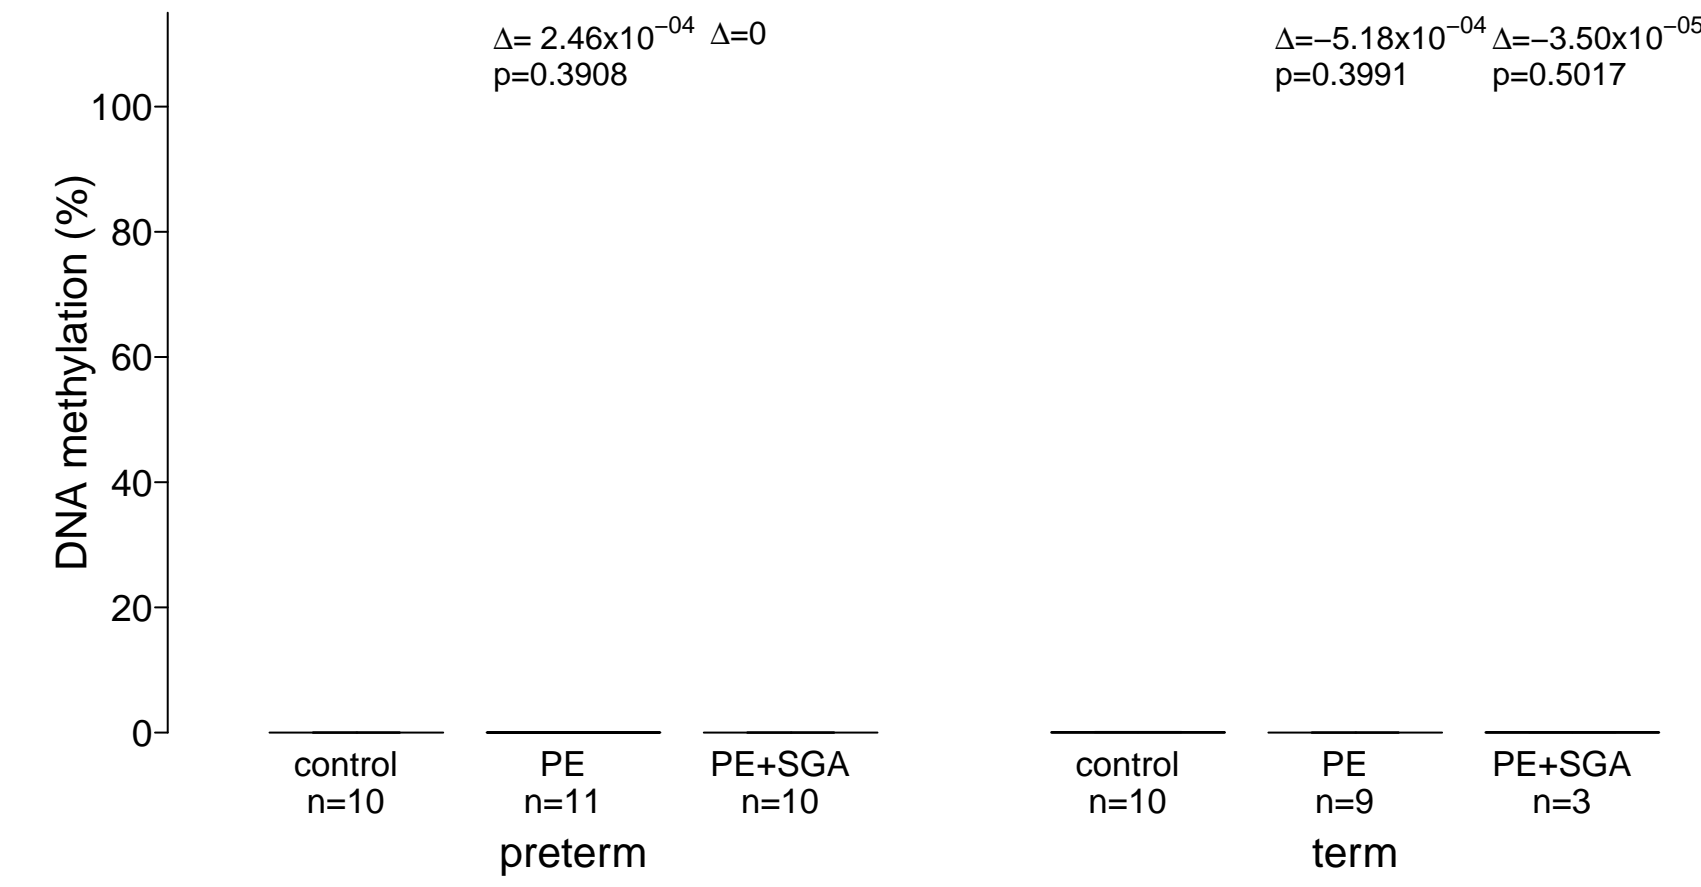

*BCL6* Chr3 187,456,629

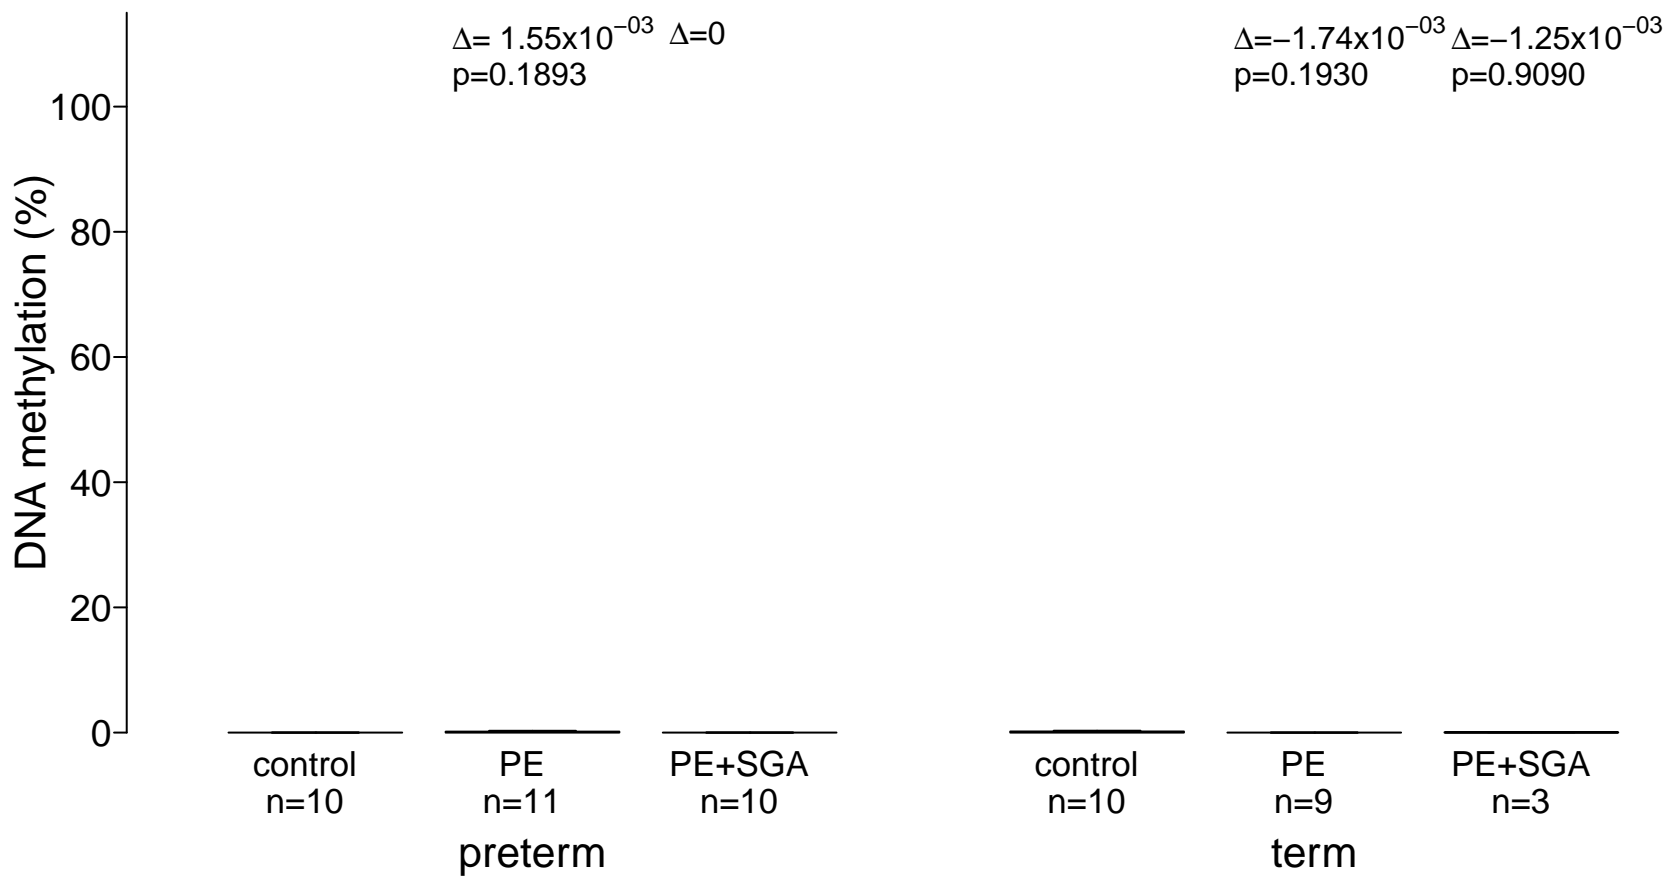

*BCL6* Chr3 187,456,652

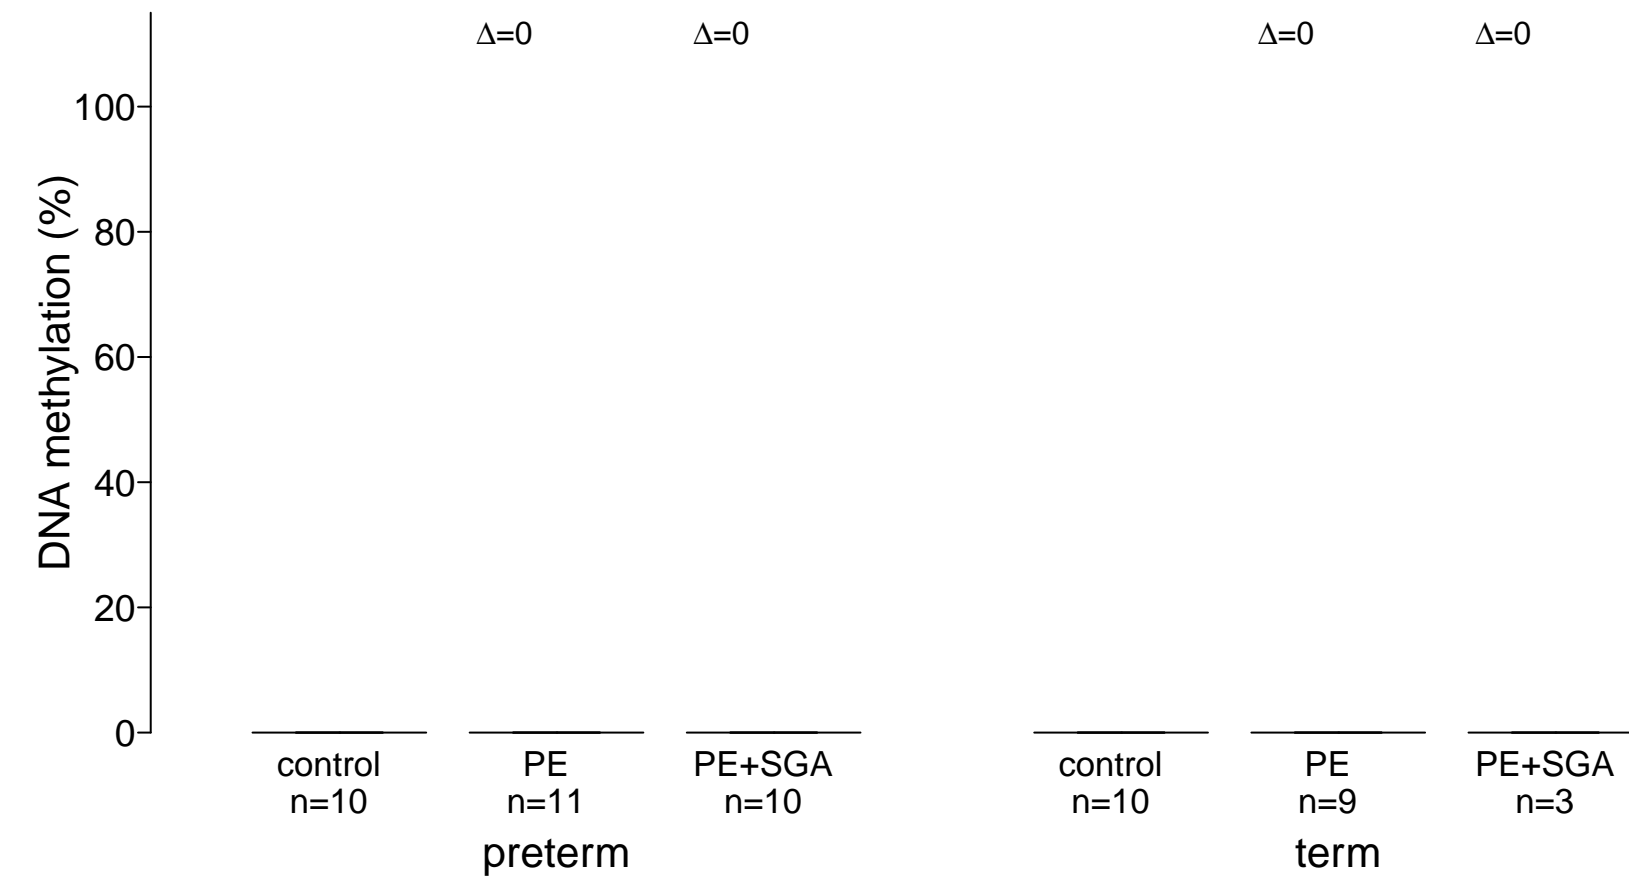

*BCL6* Chr3 187,456,734

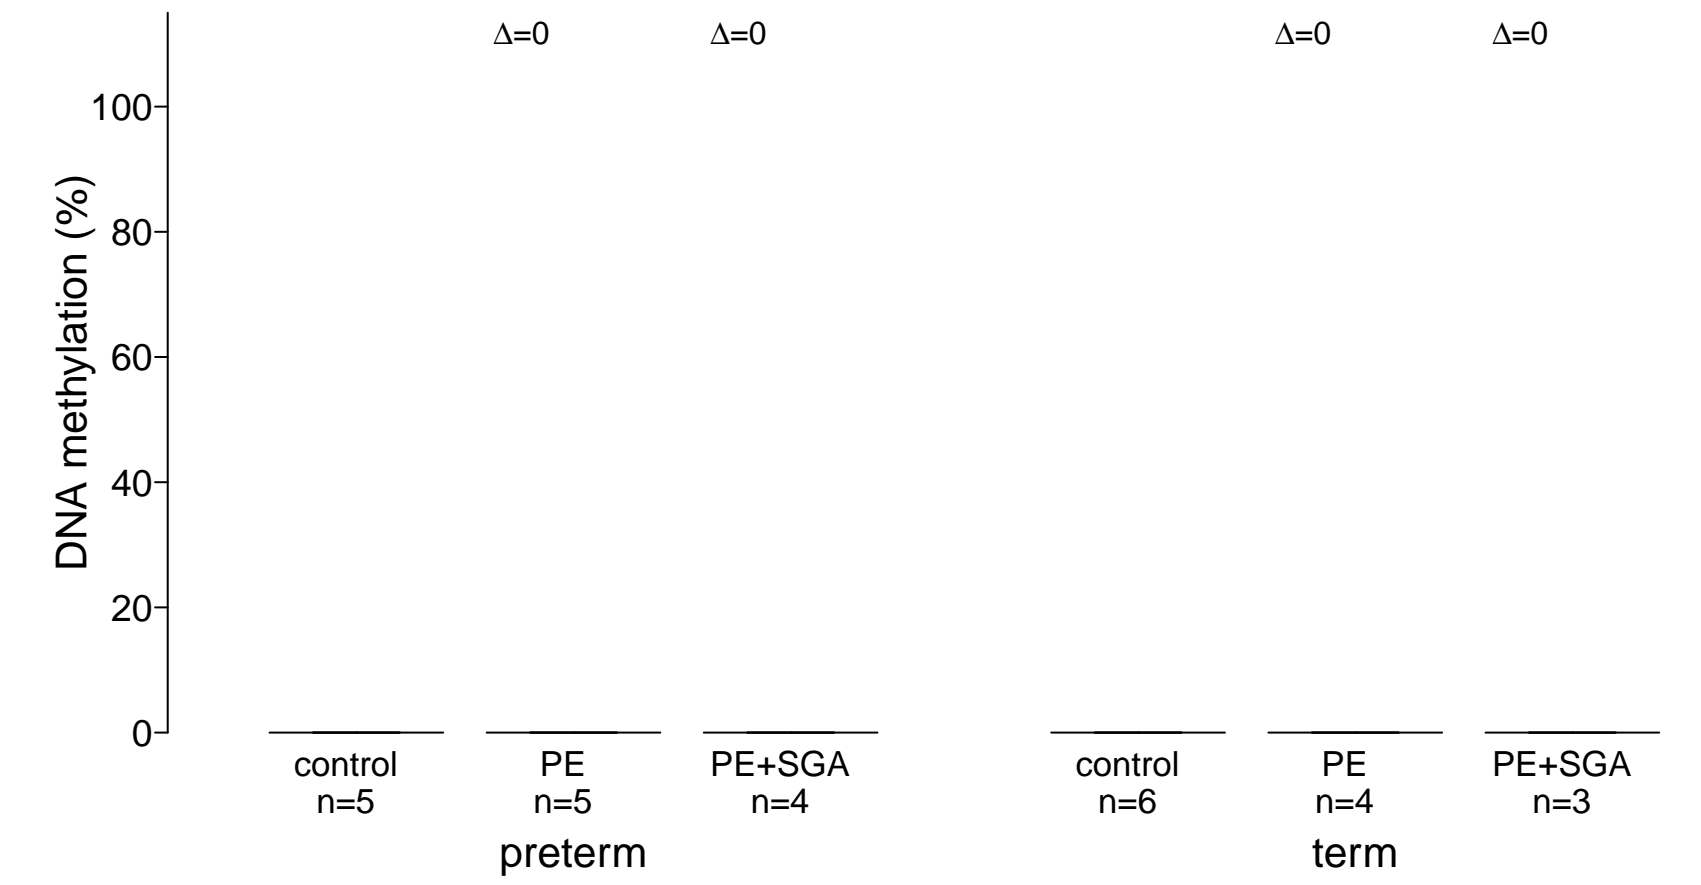

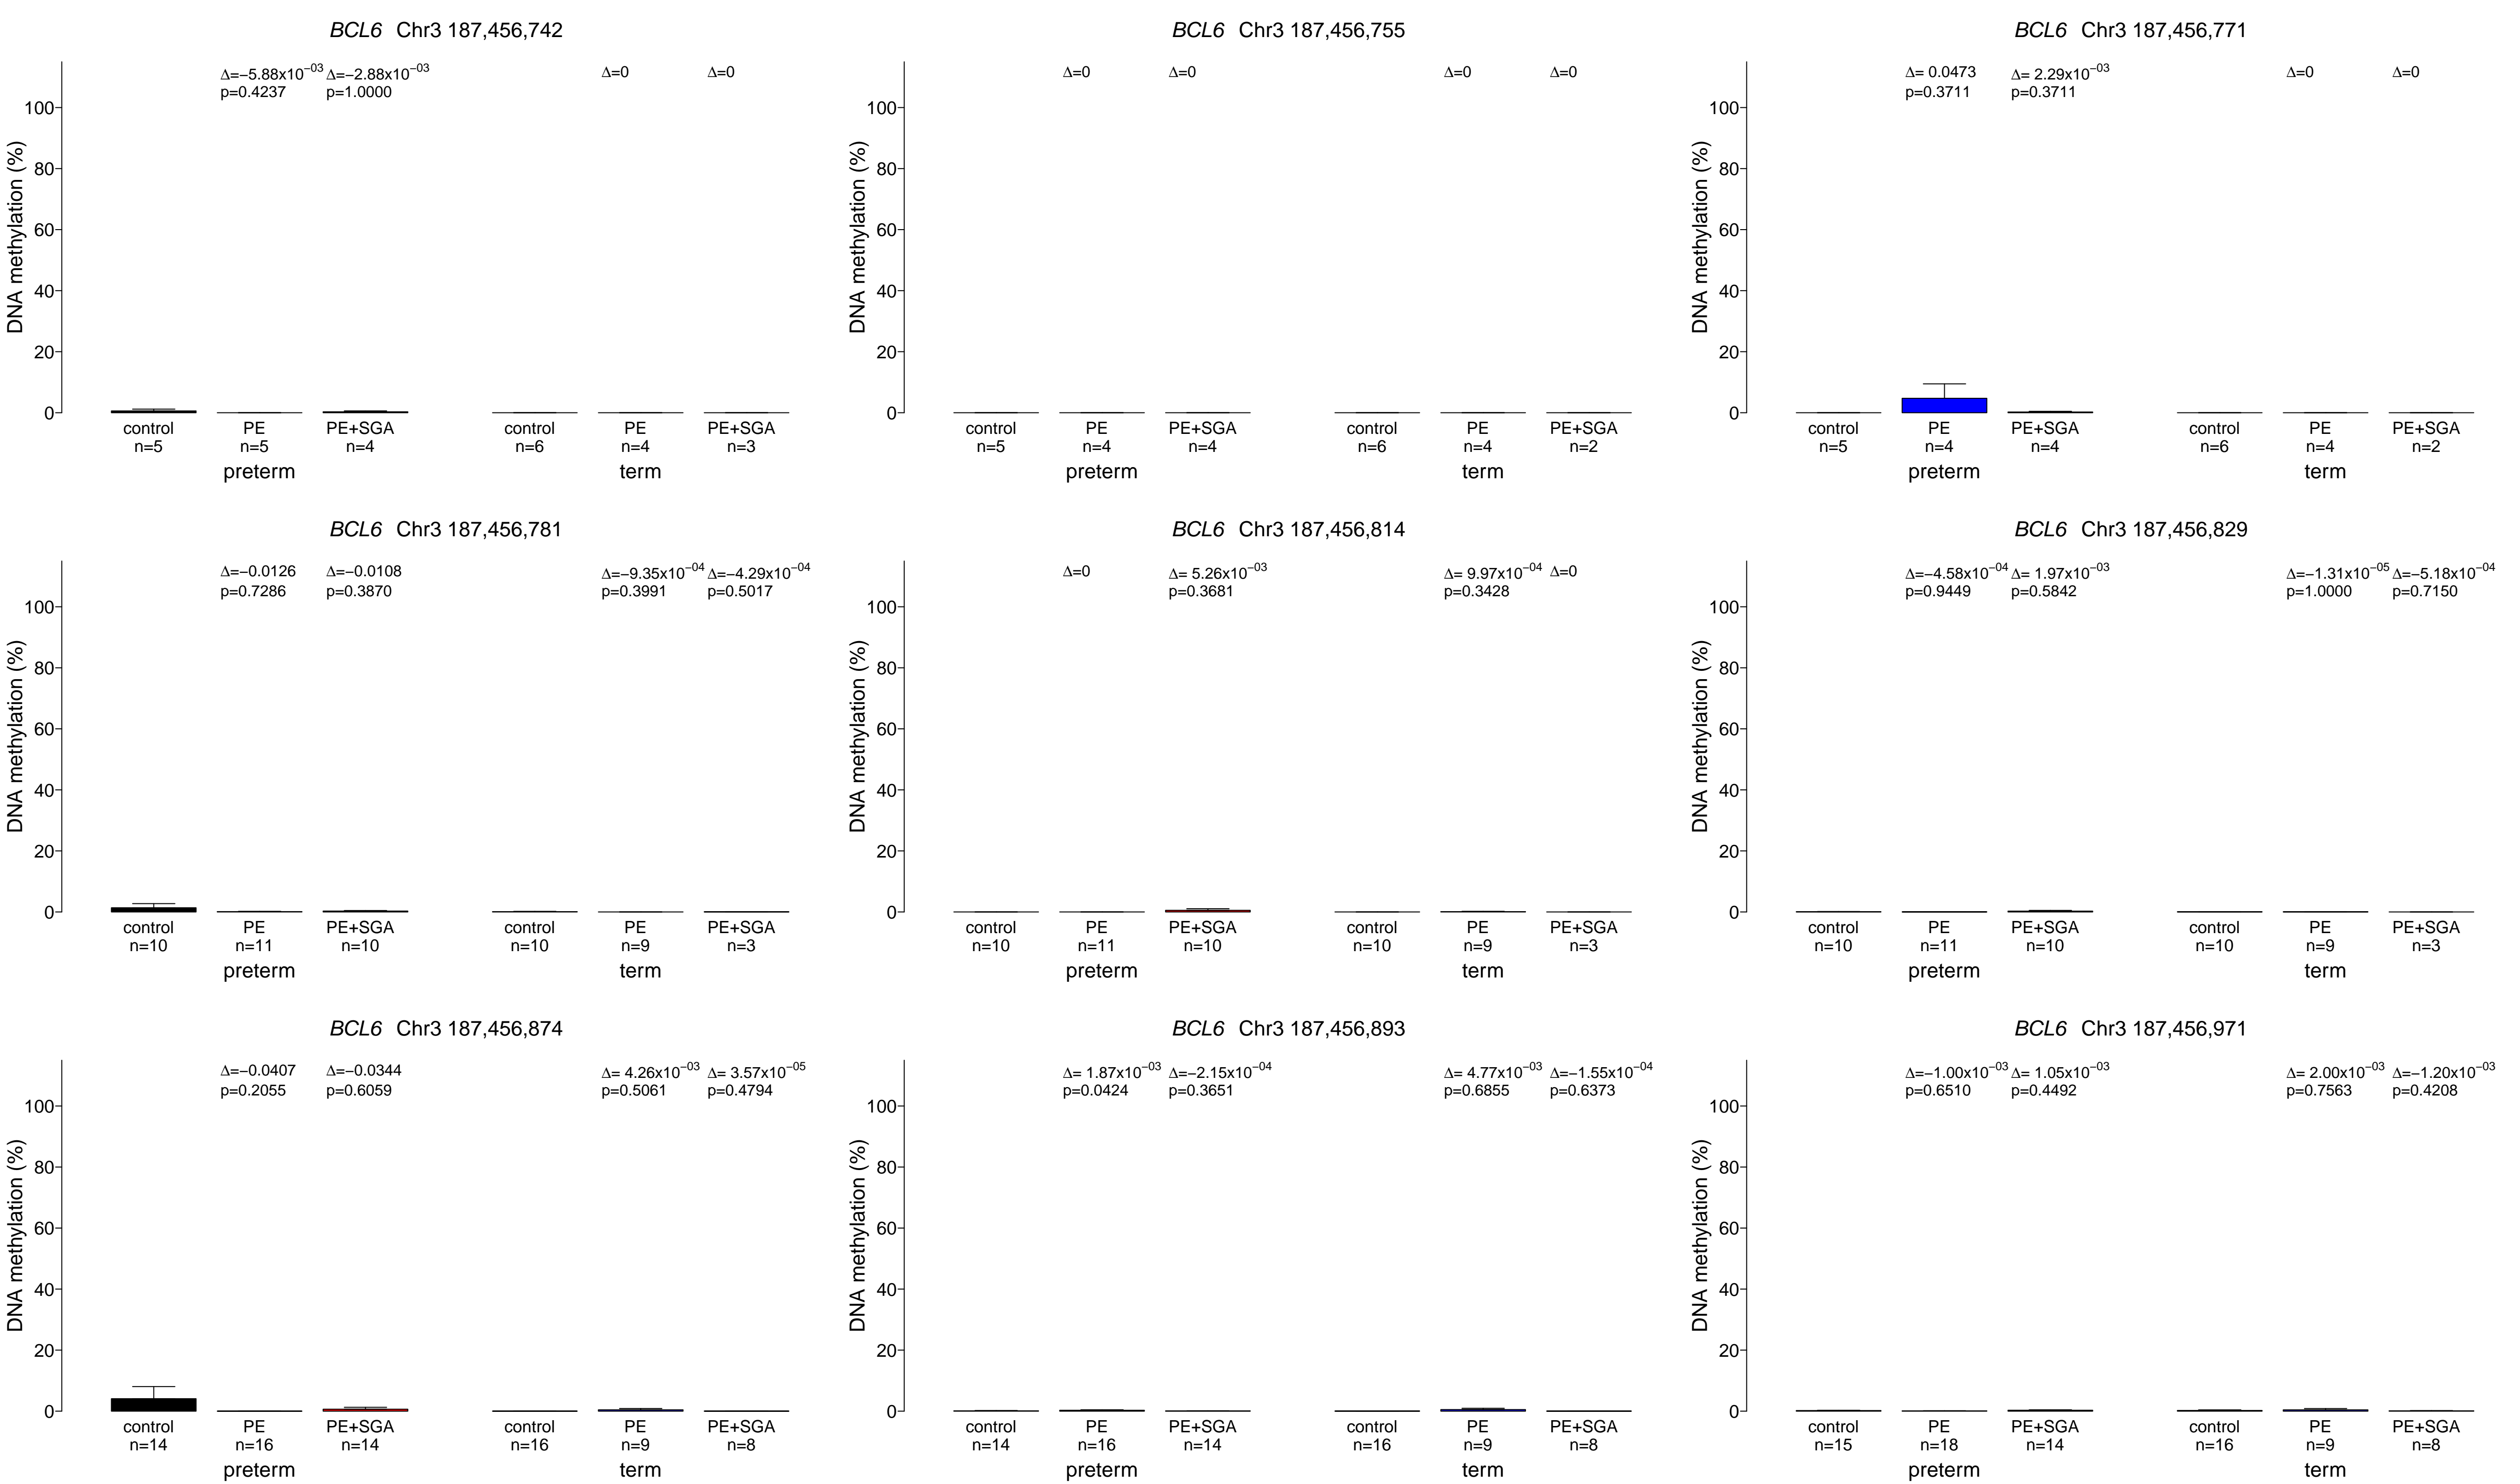

*BCL6* Chr3 187,457,055

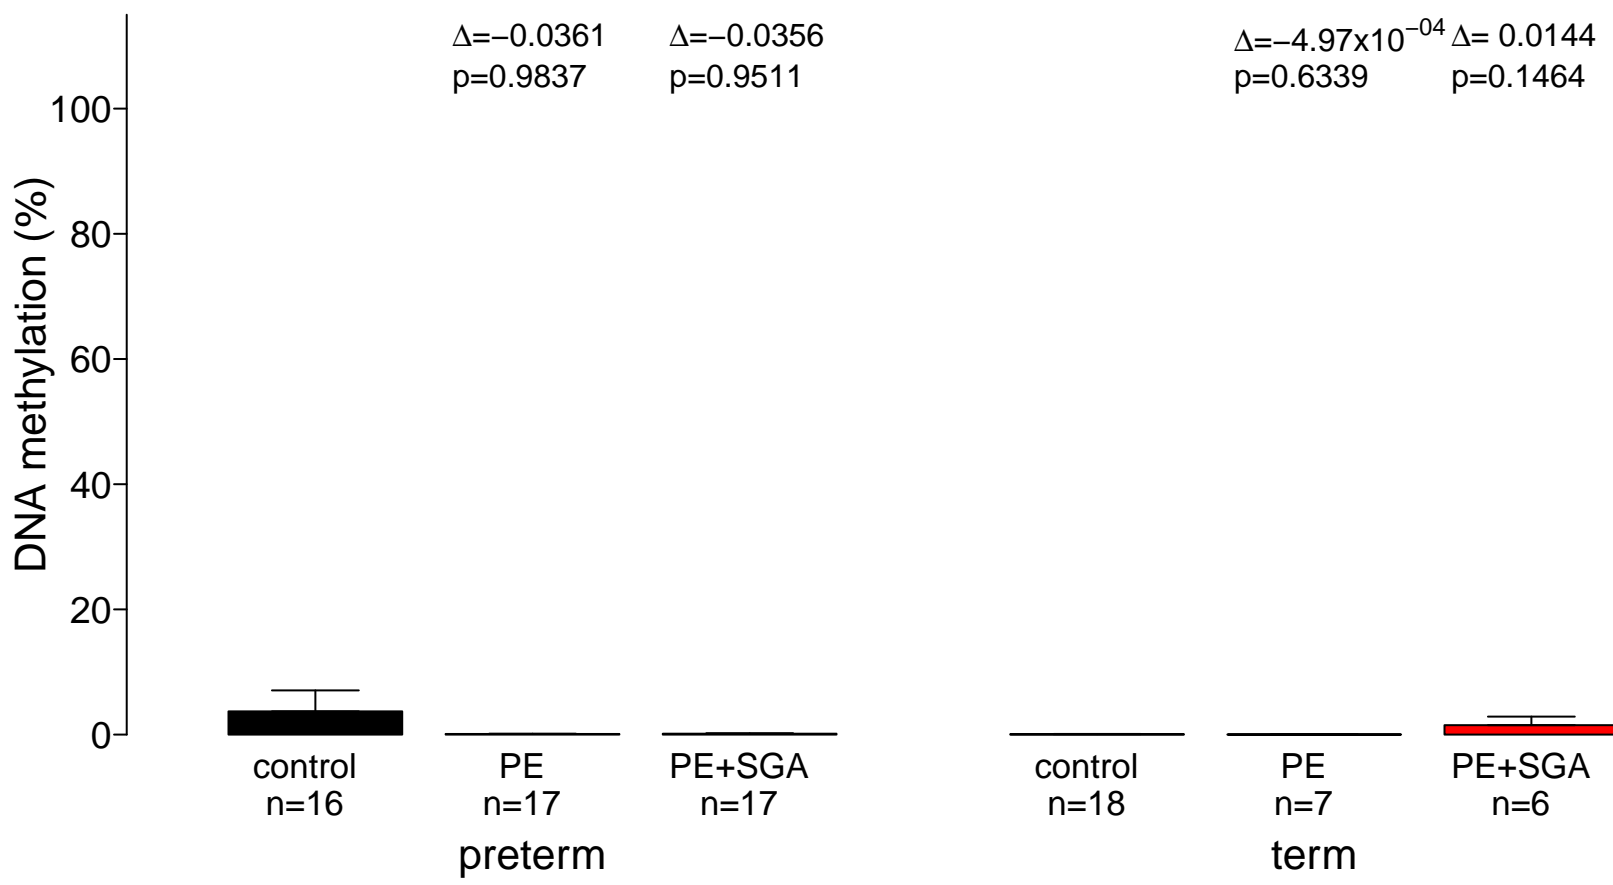

*BCL6* Chr3 187,457,067

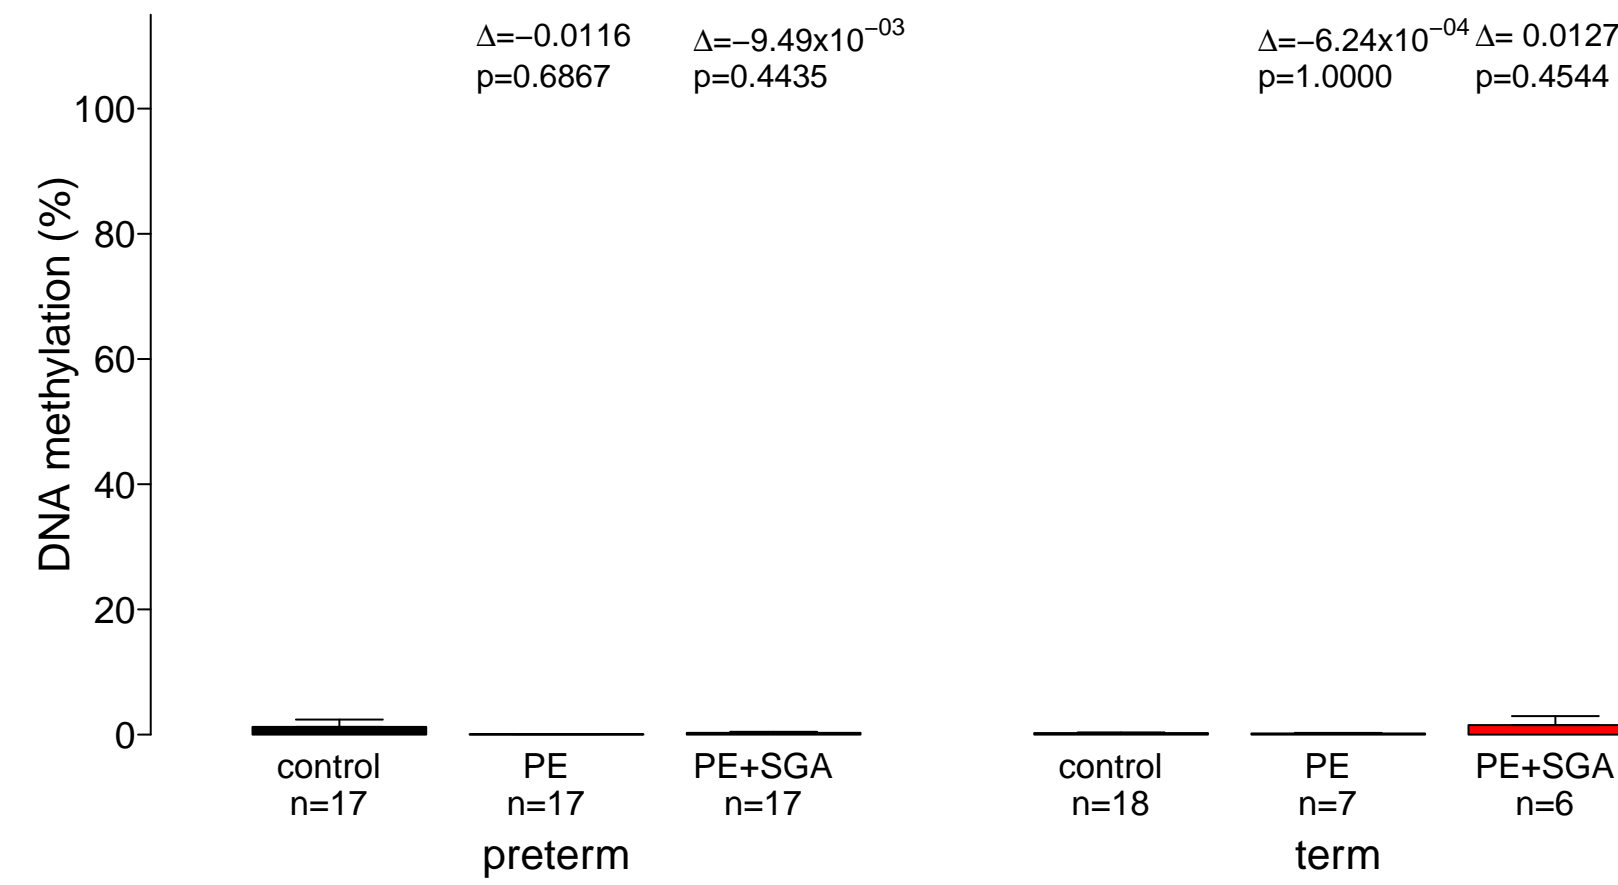

*BCL6* Chr3 187,457,084

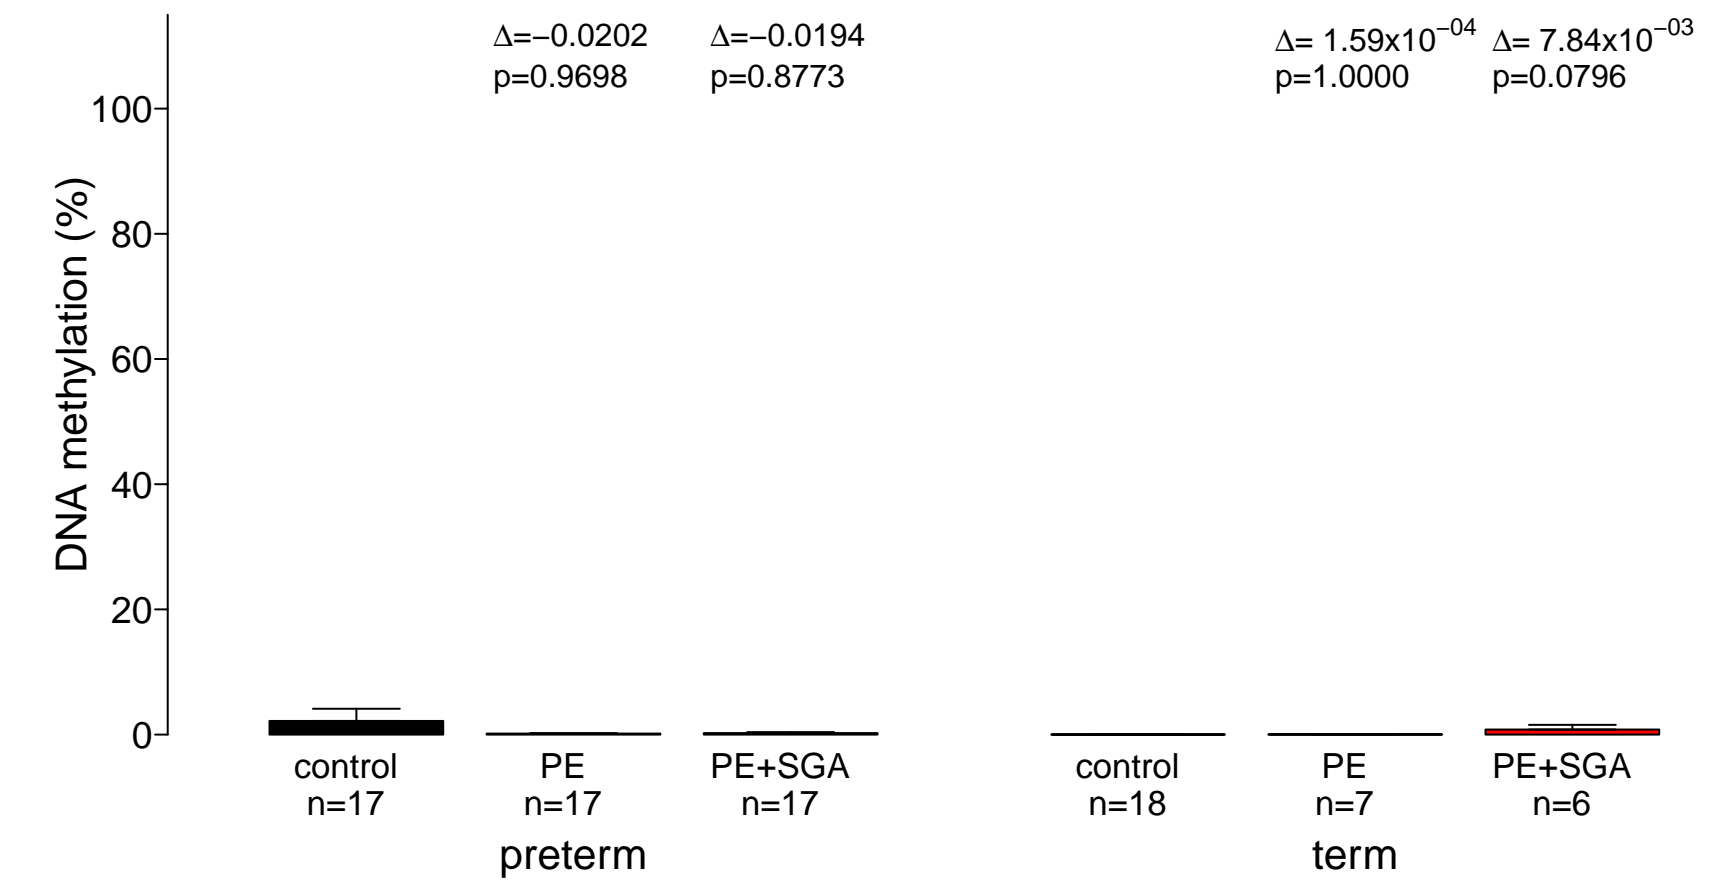

*BCL6* Chr3 187,457,095

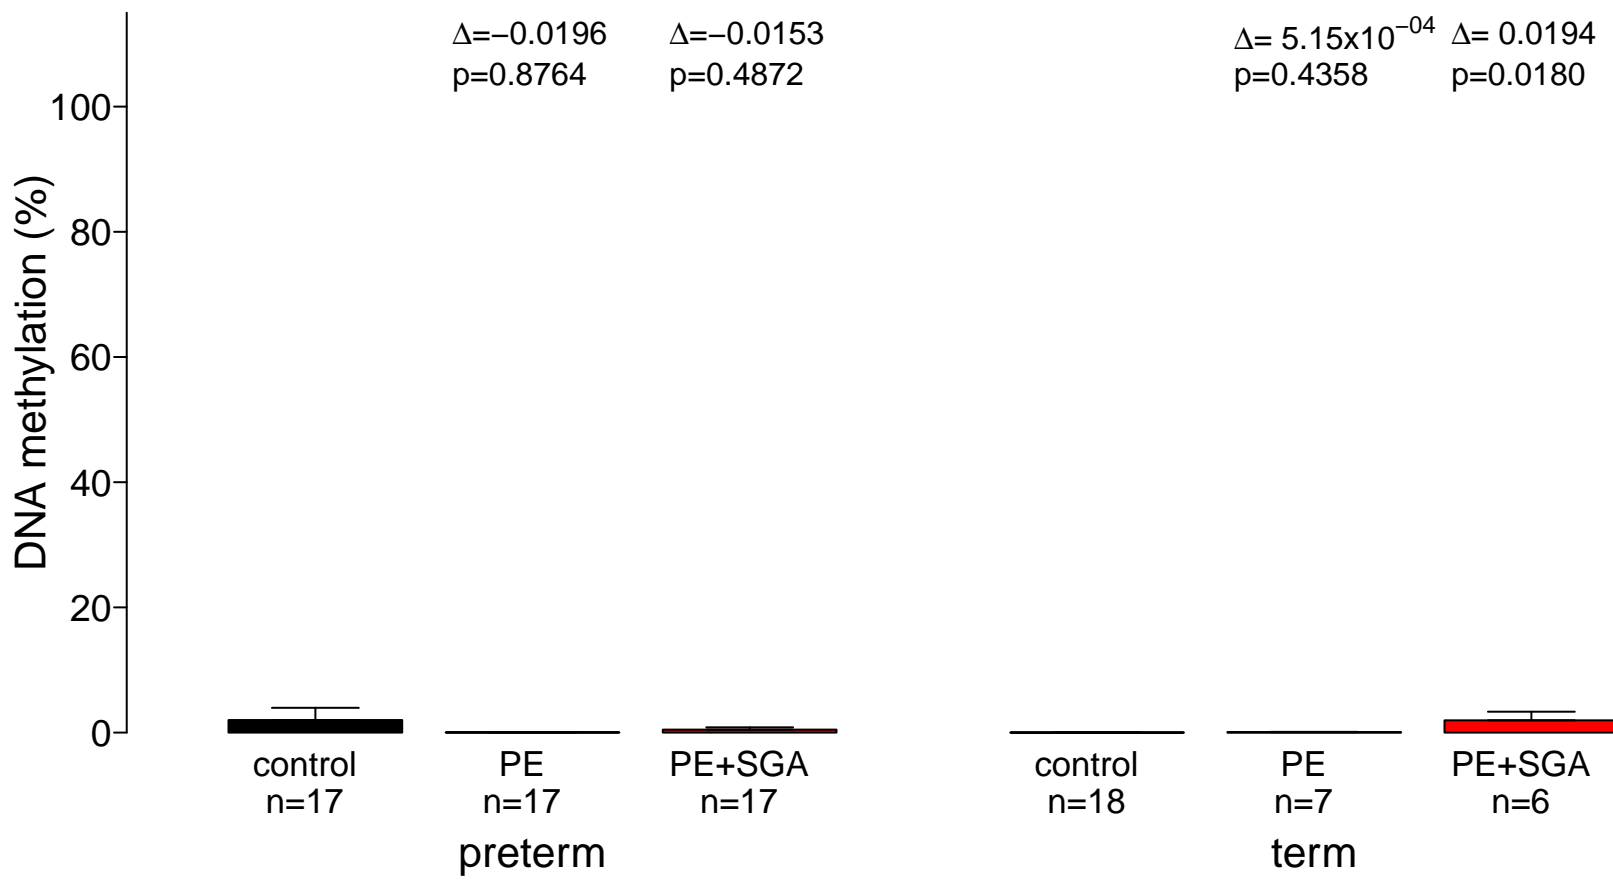

*BCL6* Chr3 187,457,128

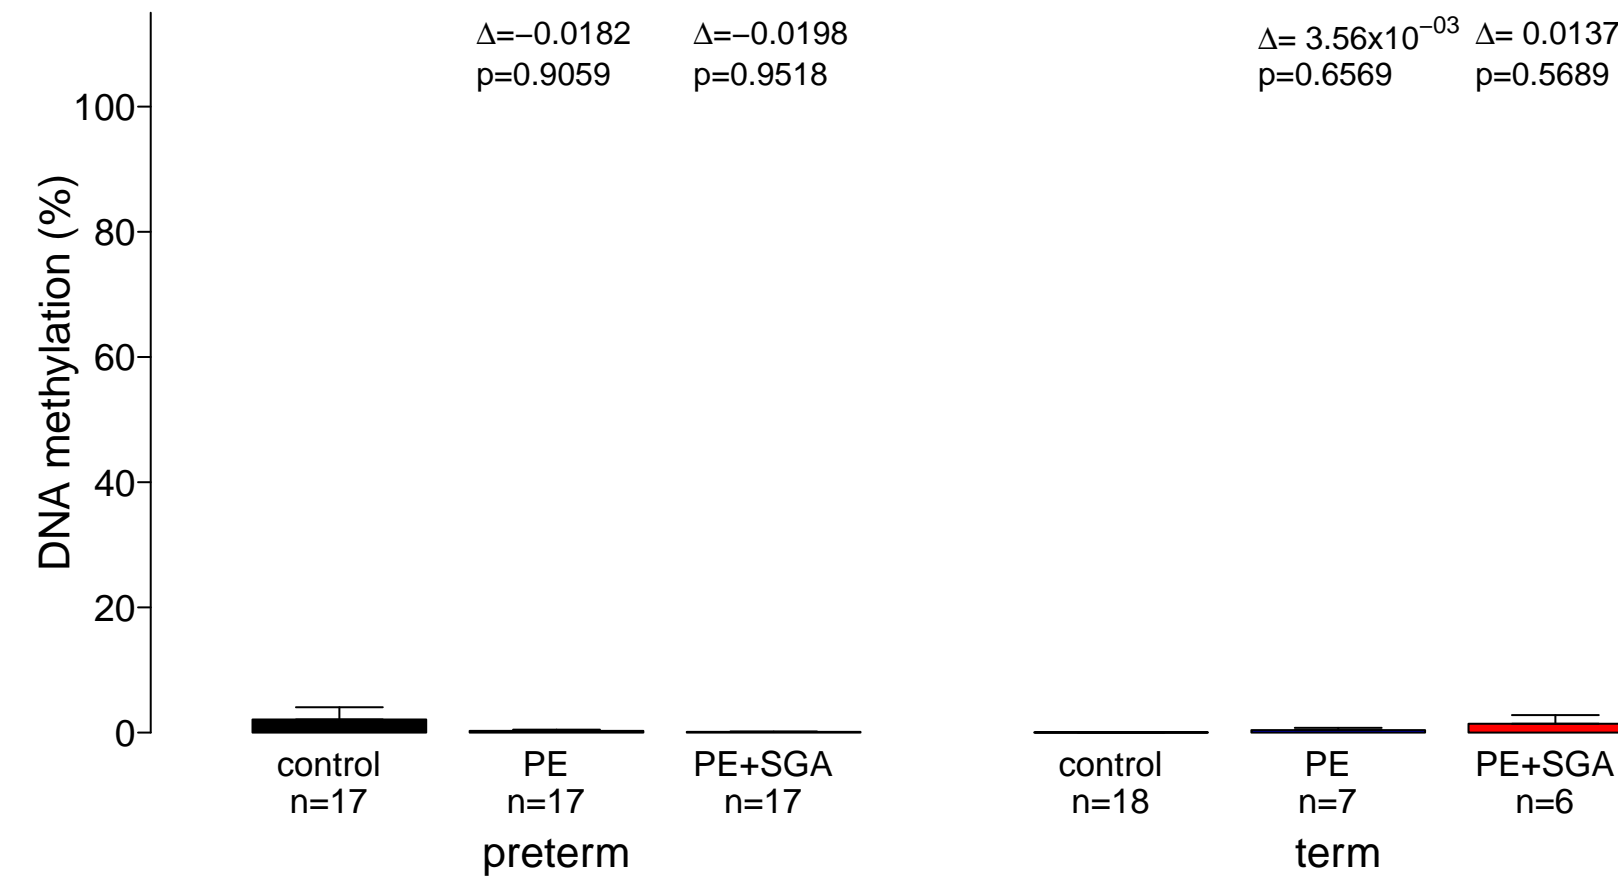

*BCL6* Chr3 187,457,144

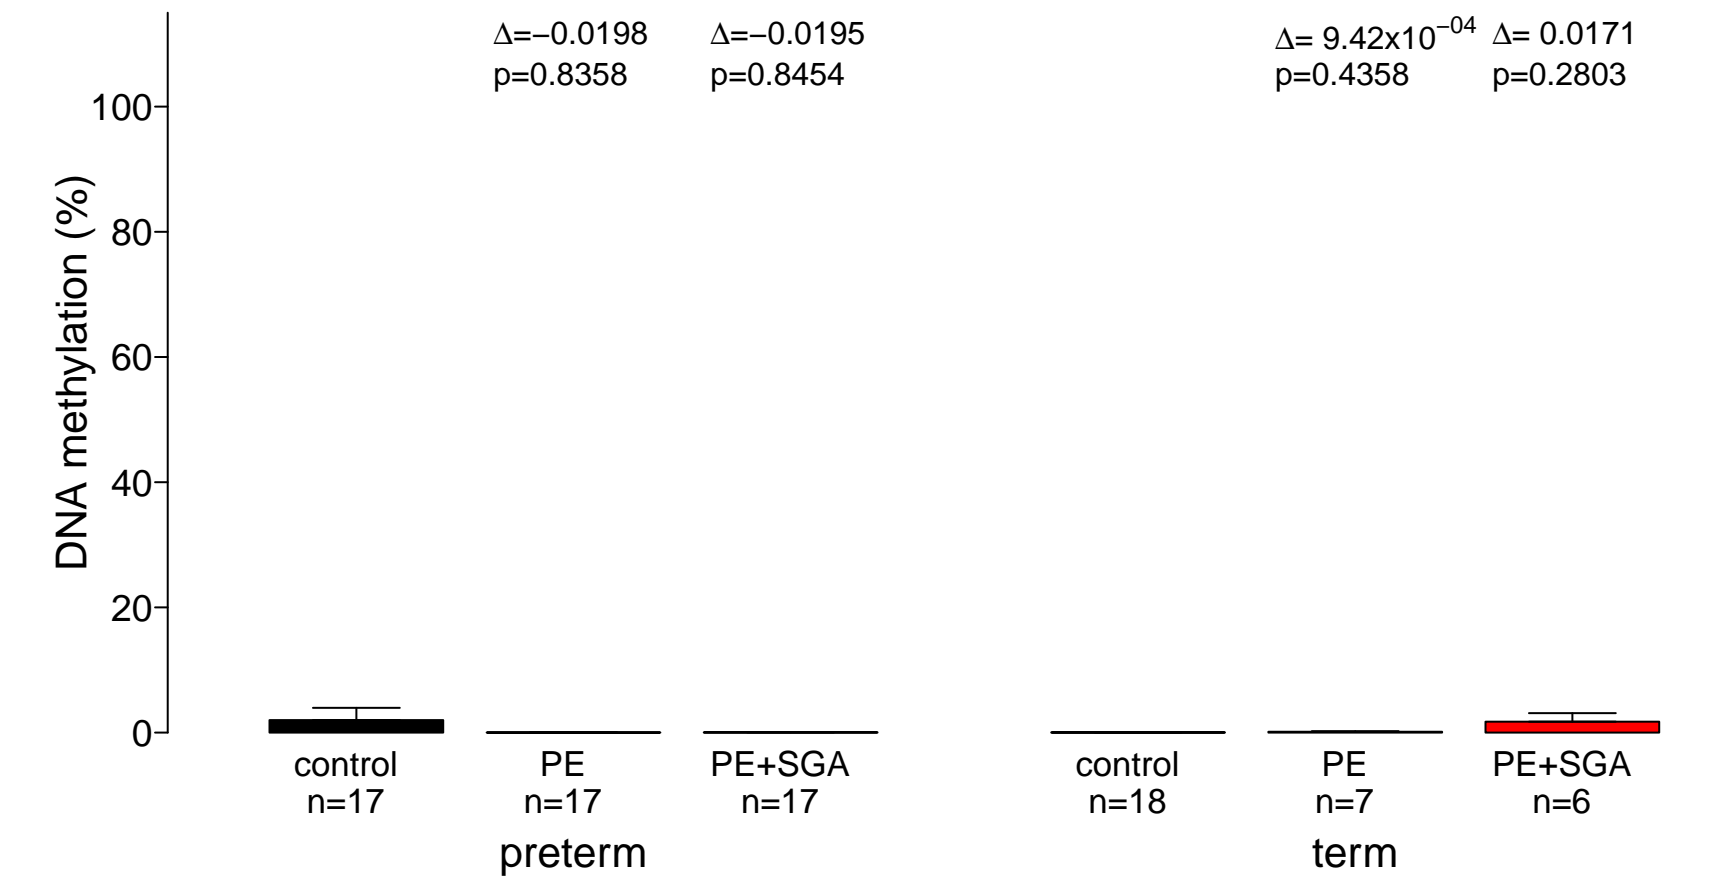

*BCL6* Chr3 187,457,151

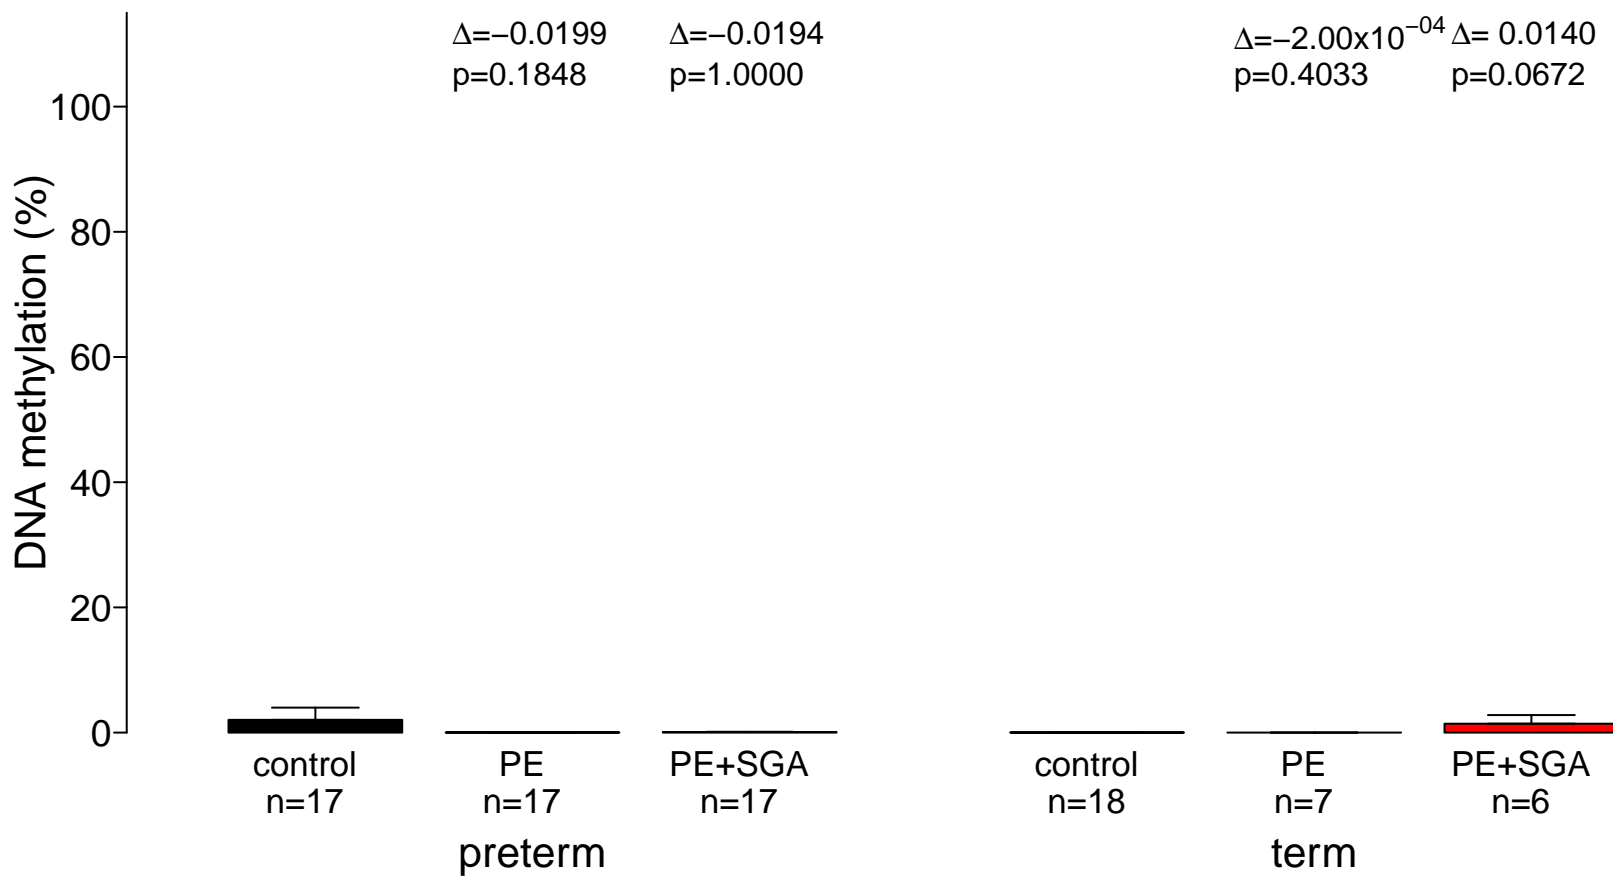

*BCL6* Chr3 187,457,154

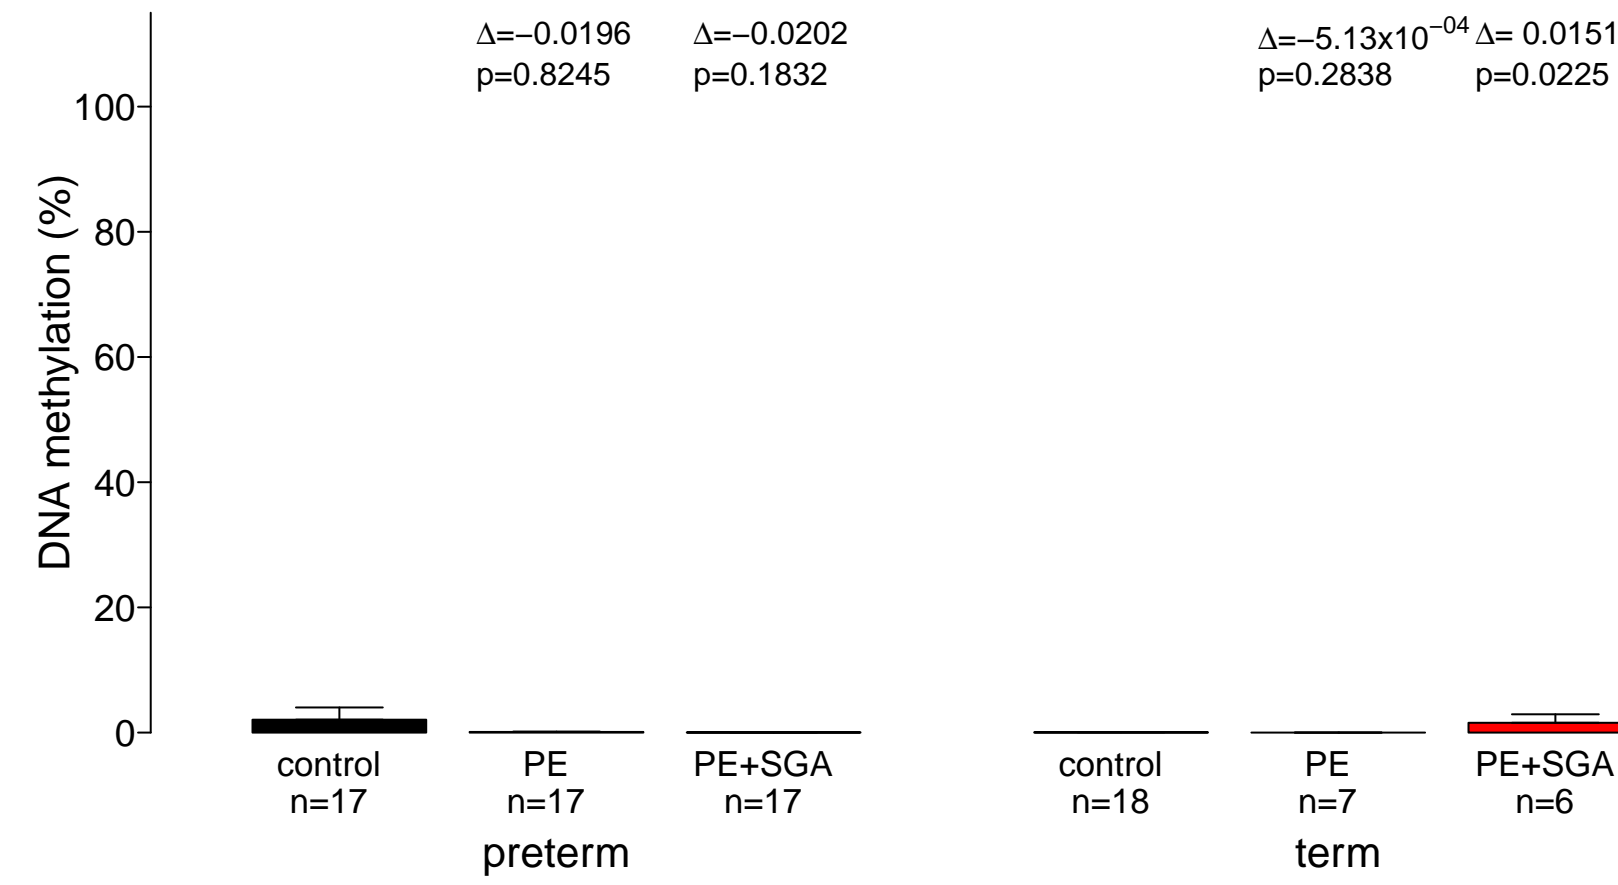

*BCL6* Chr3 187,457,175

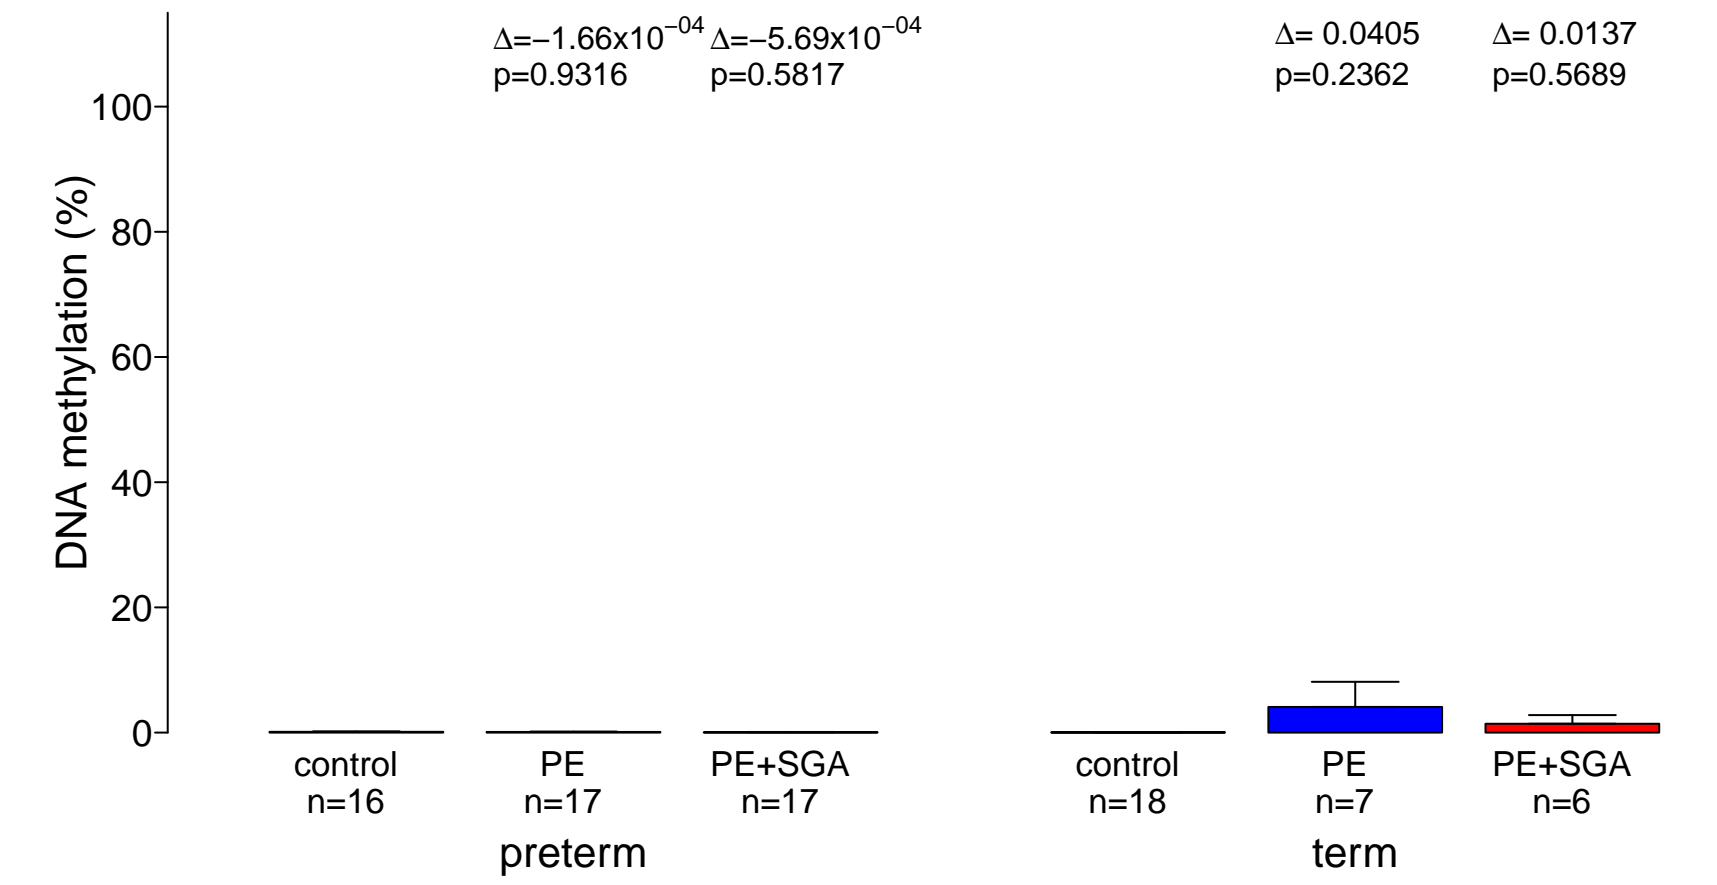

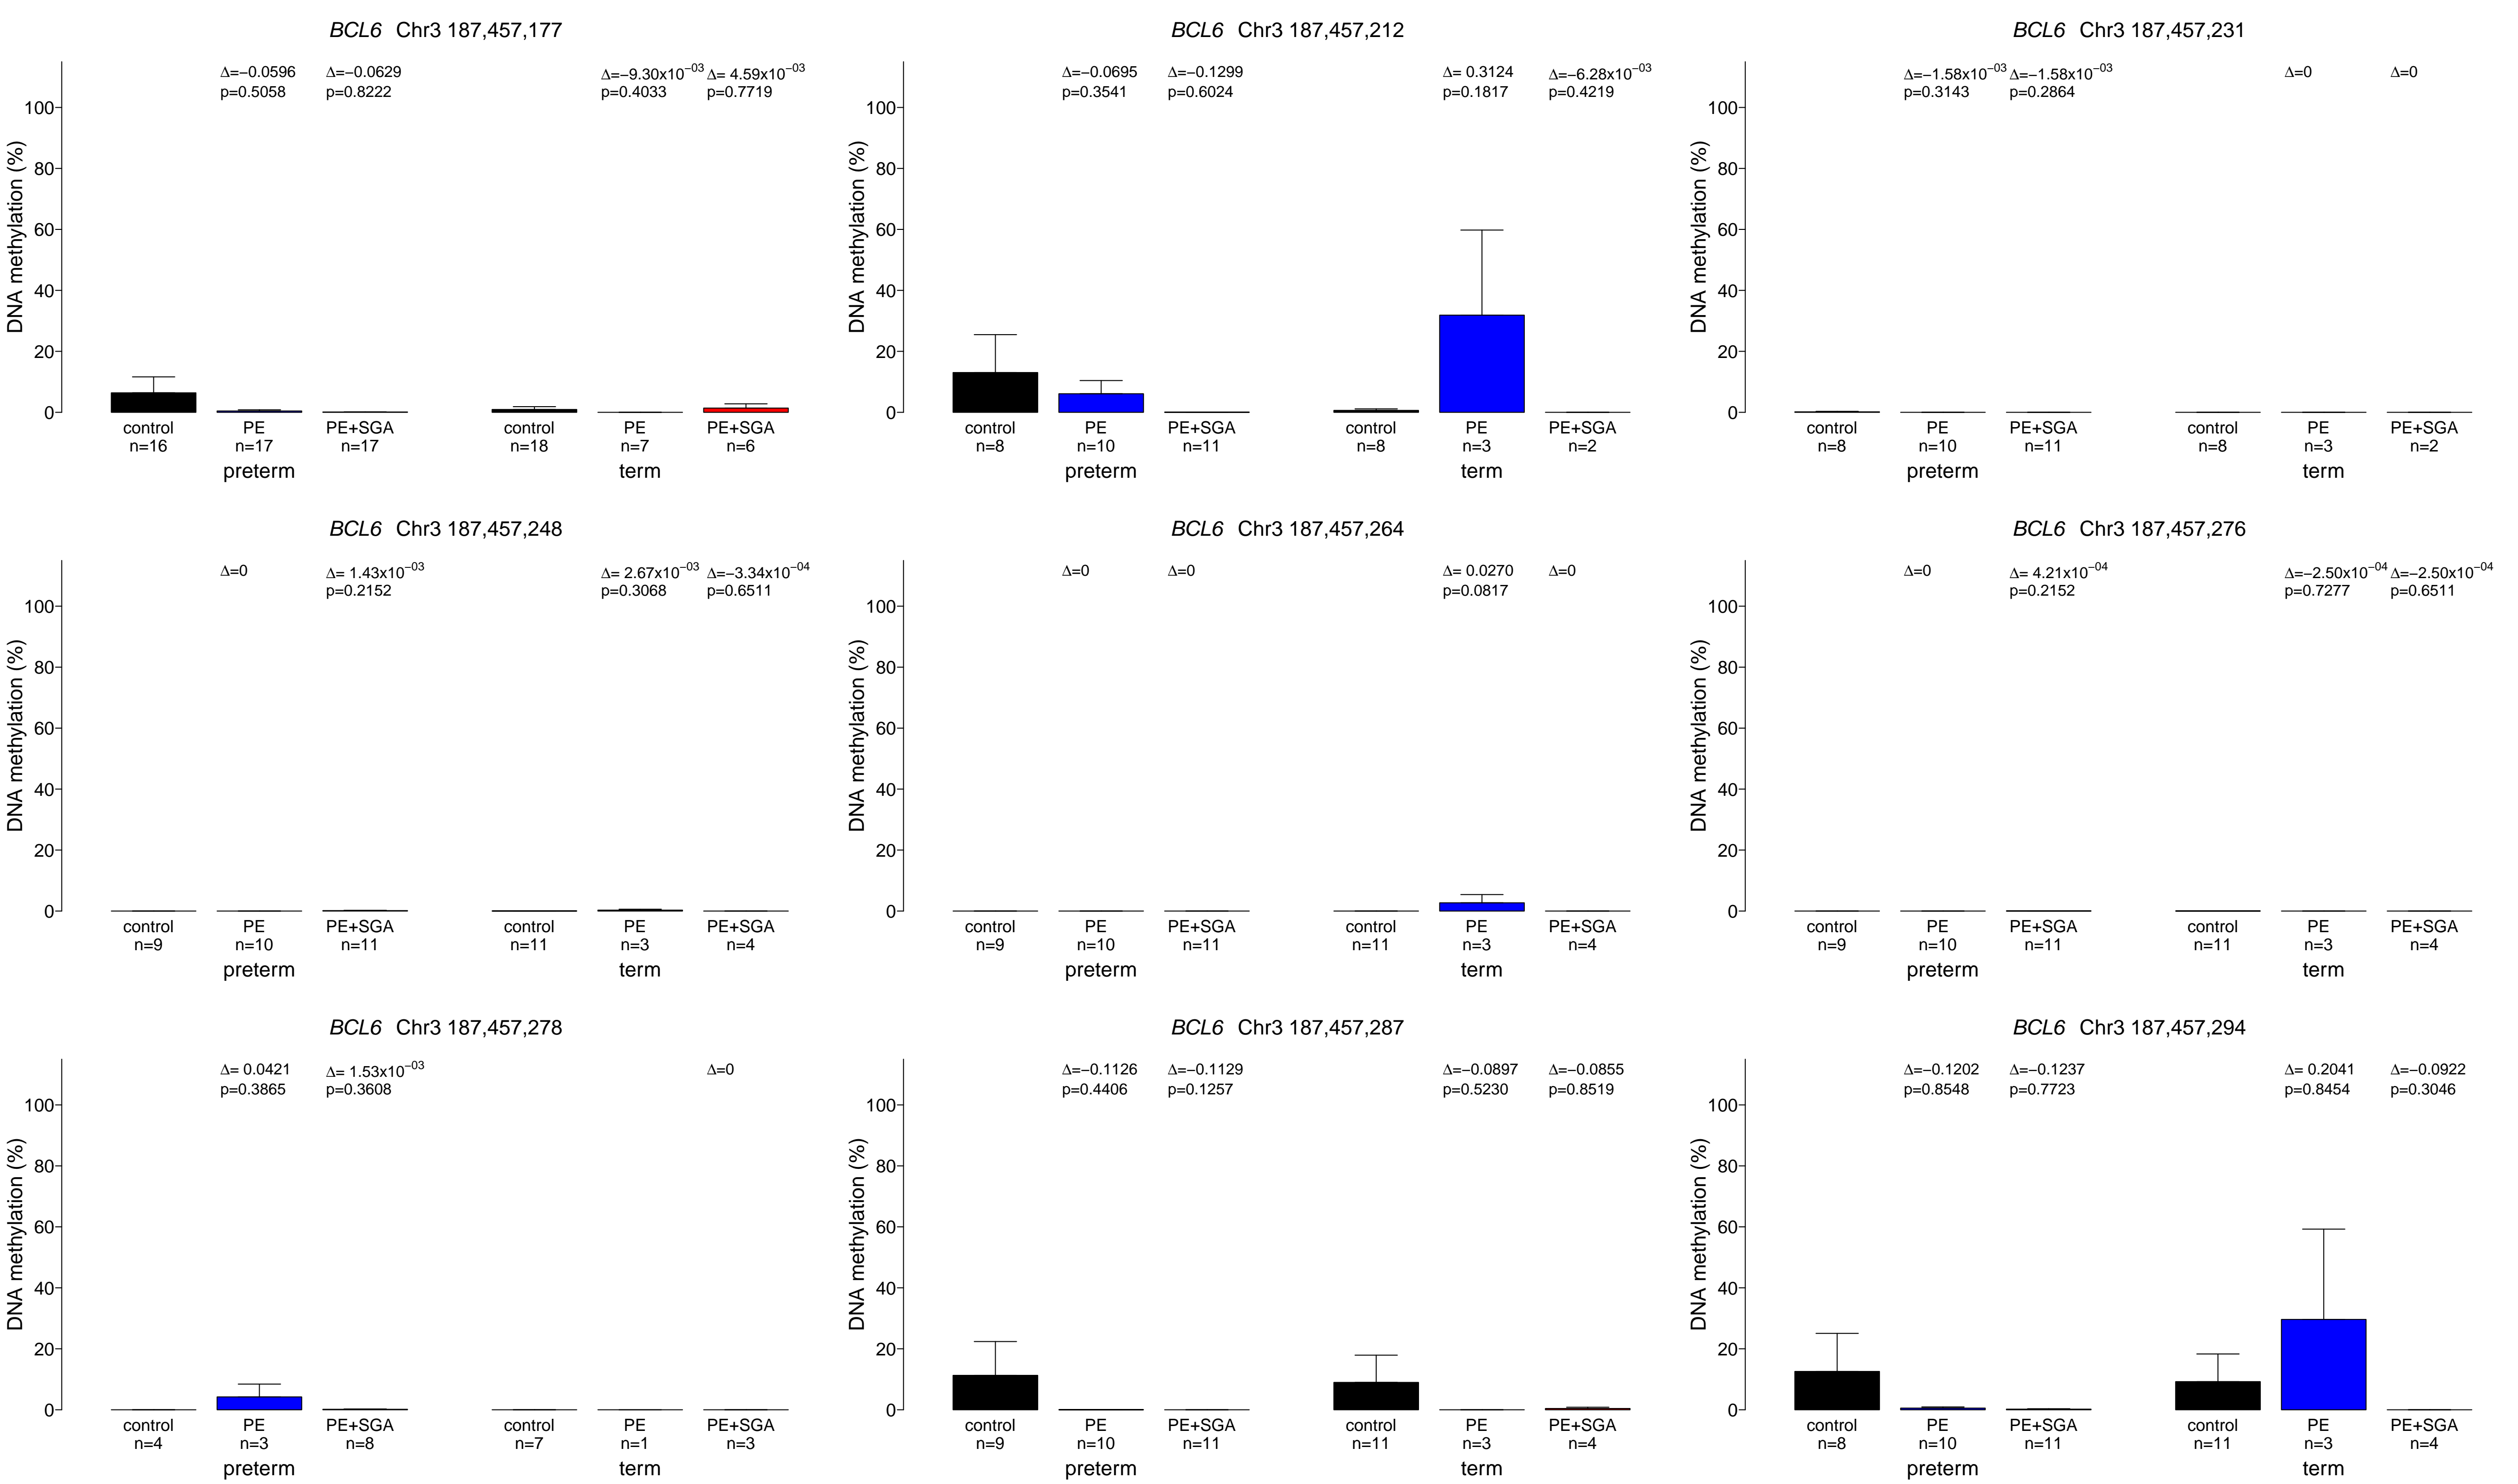

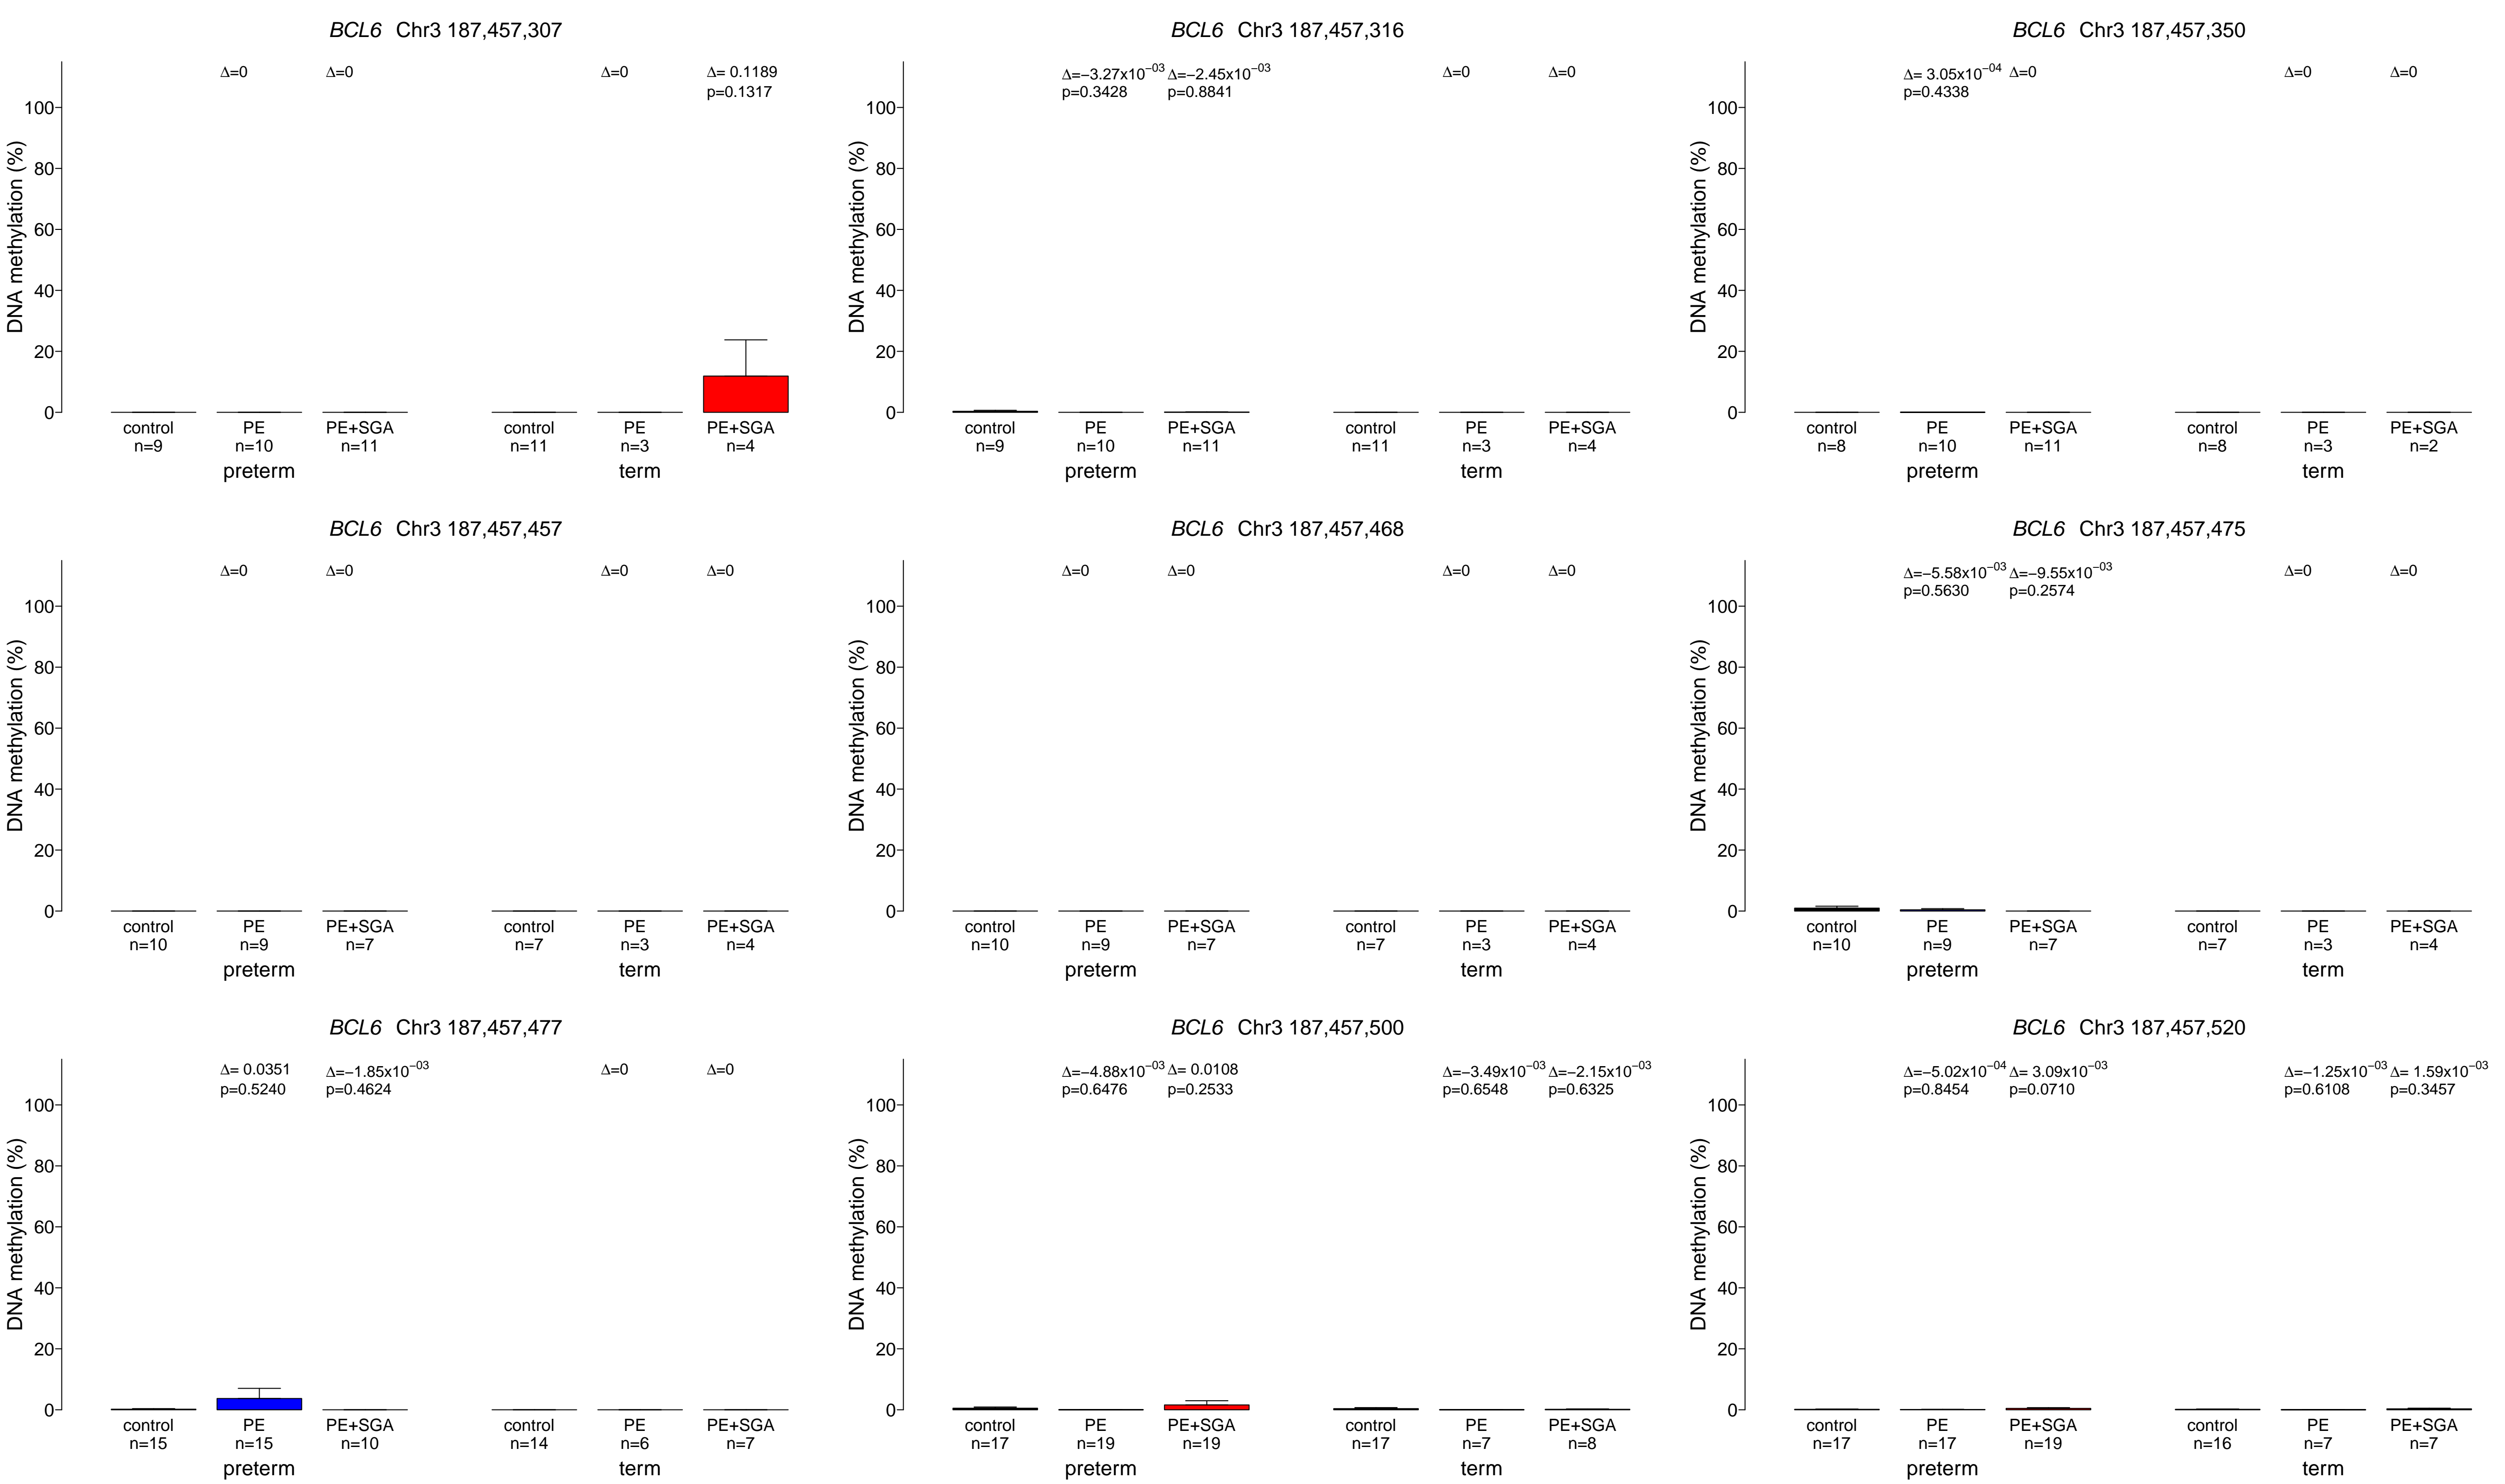



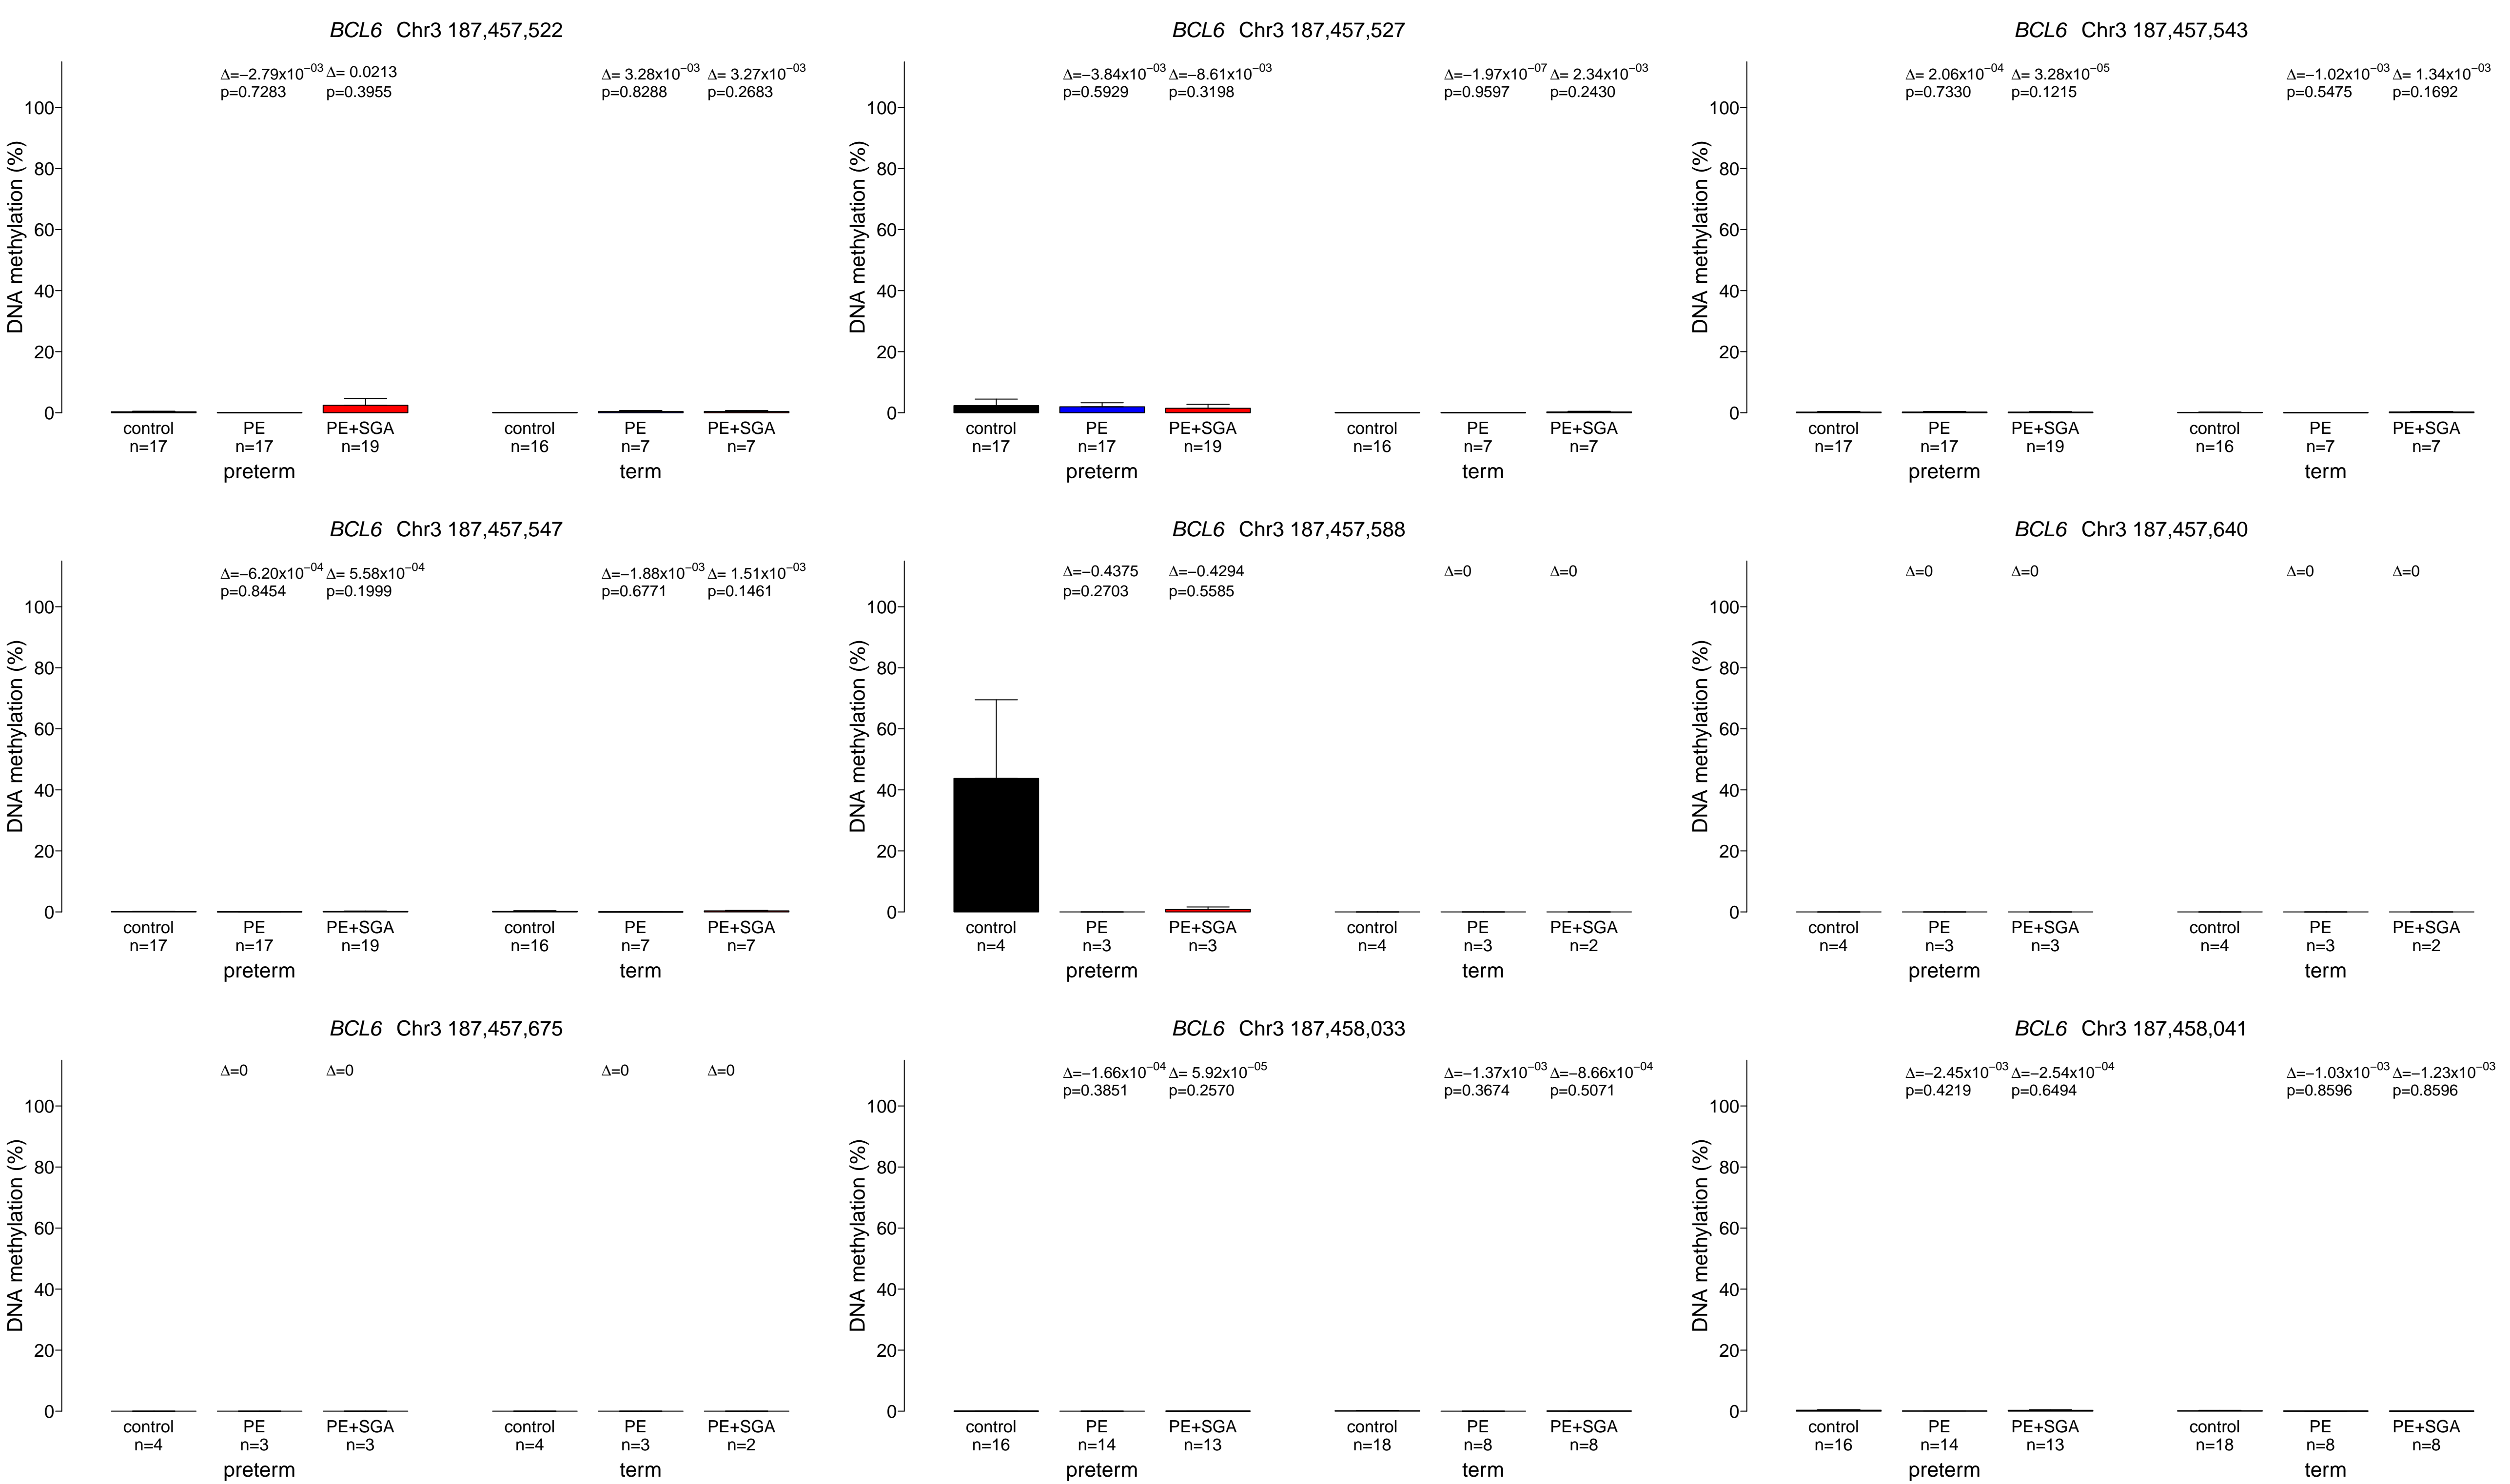

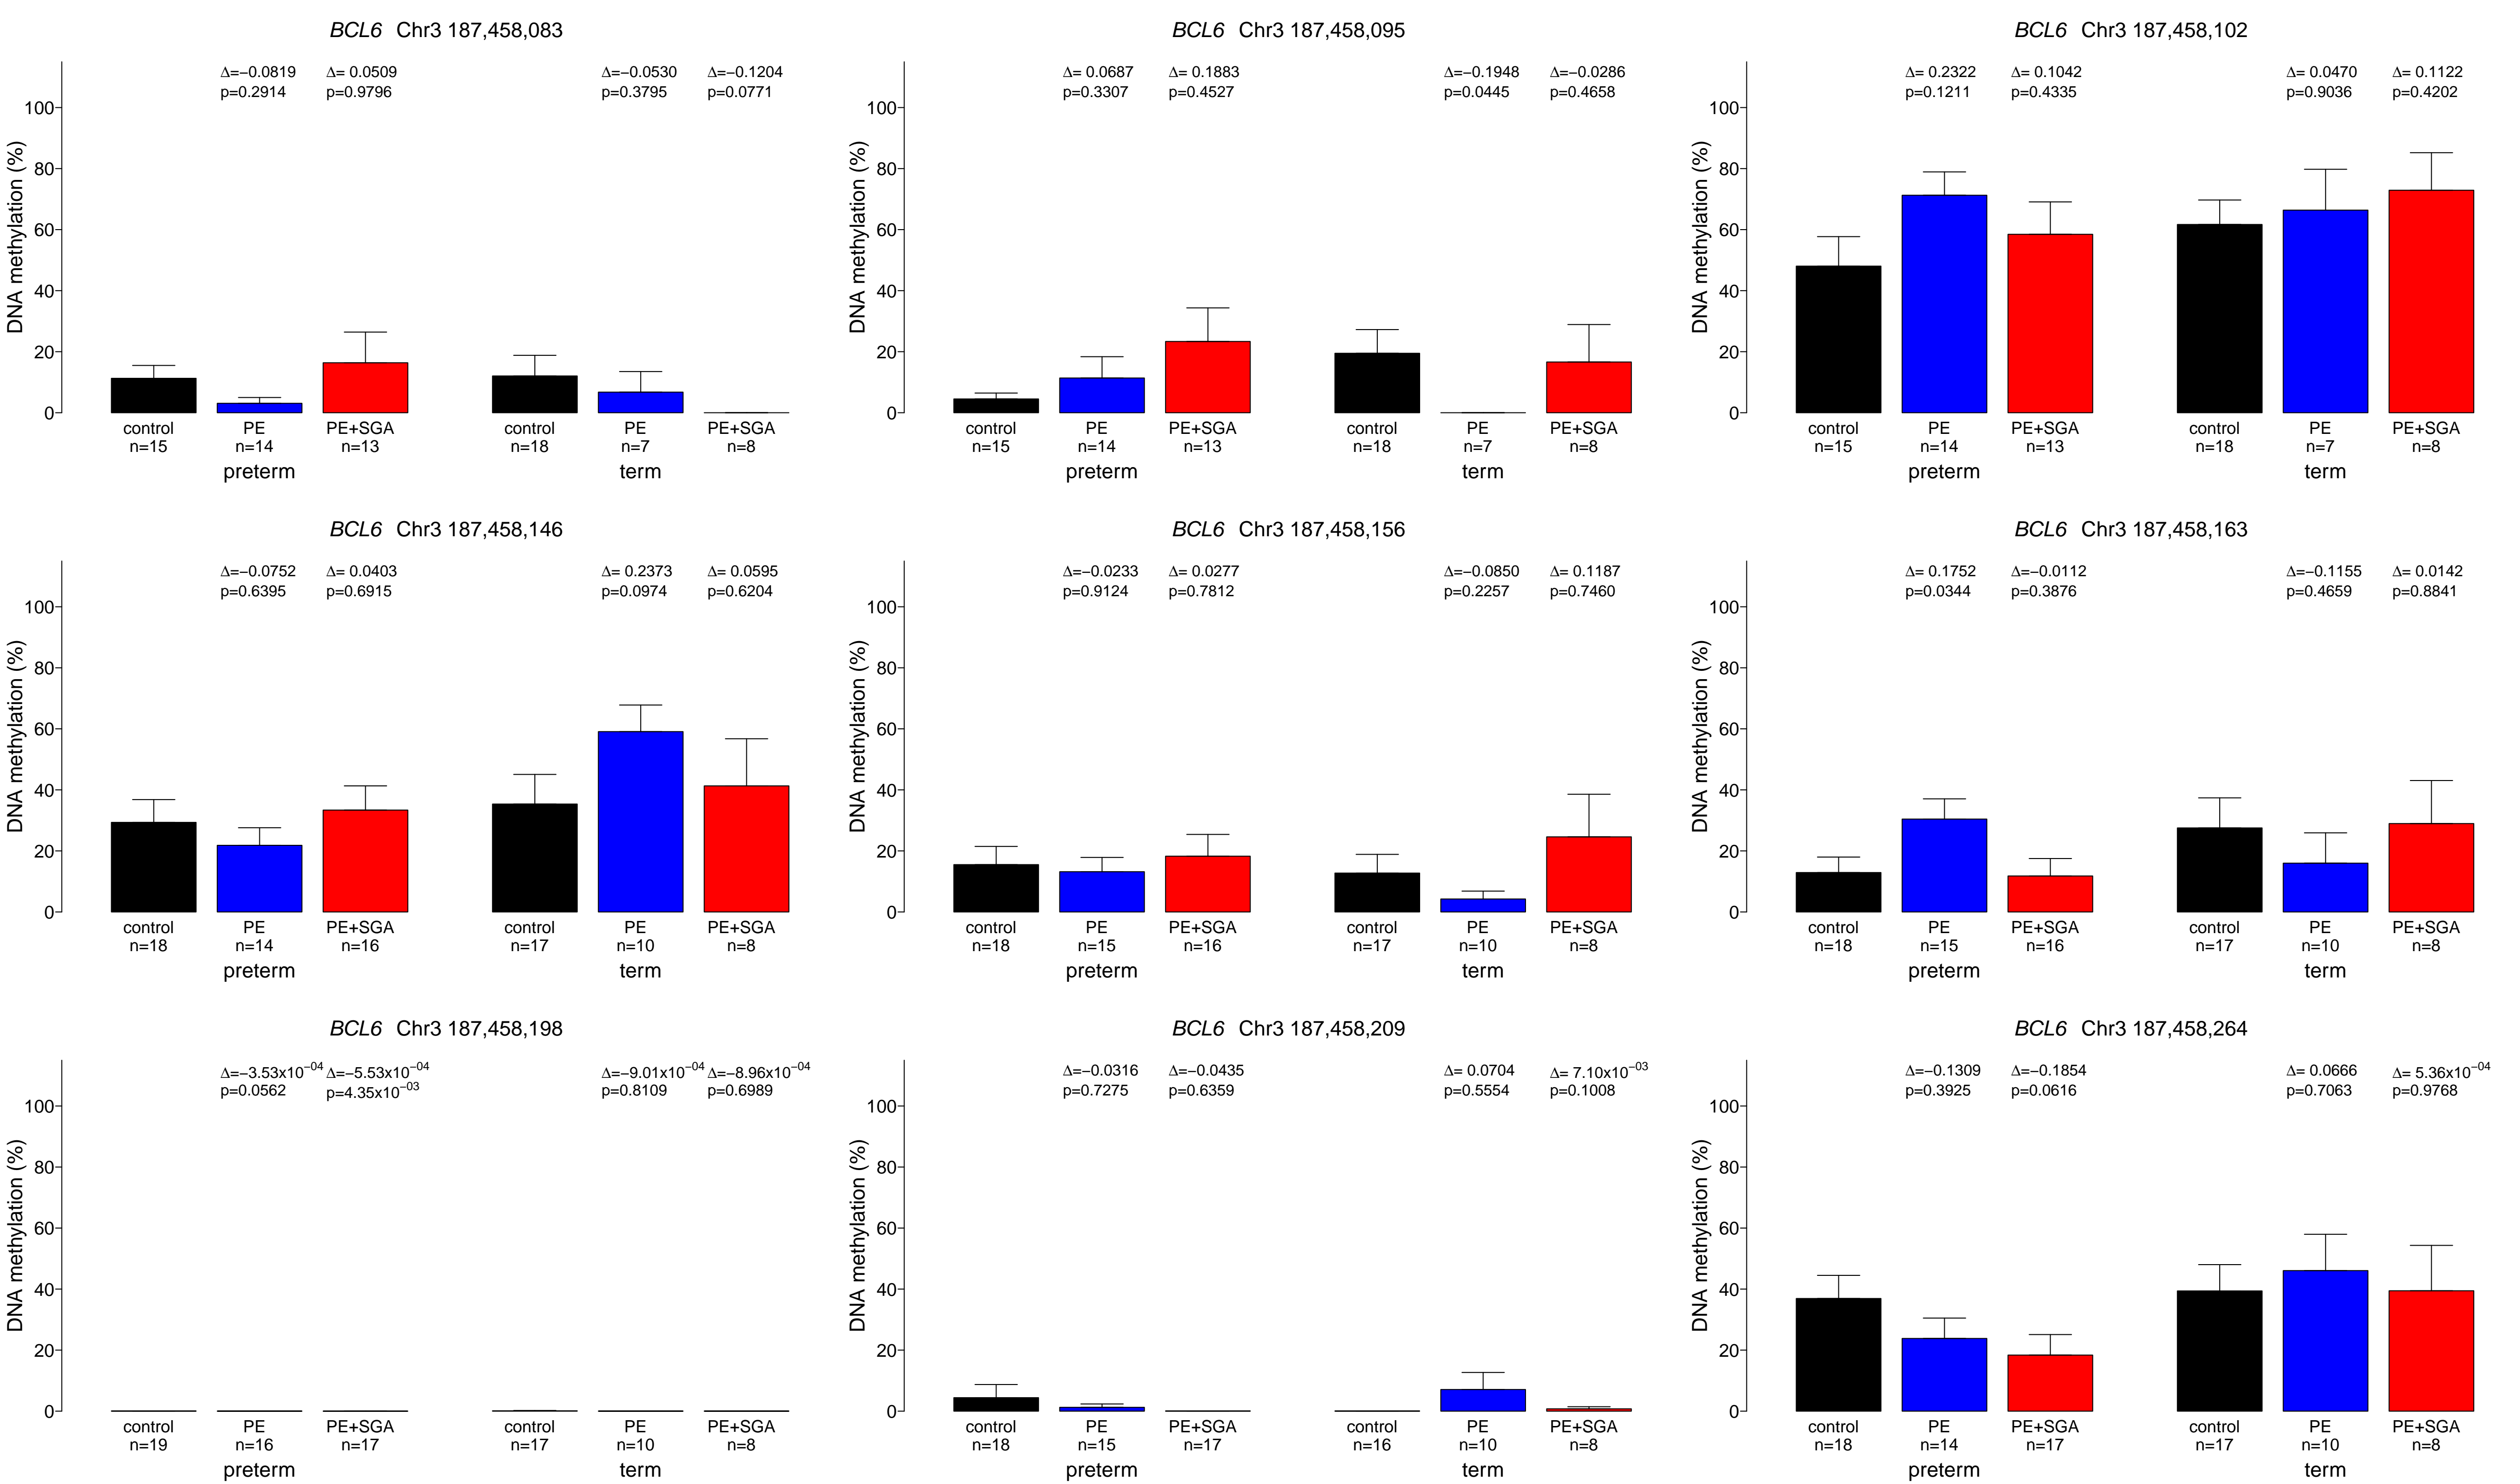

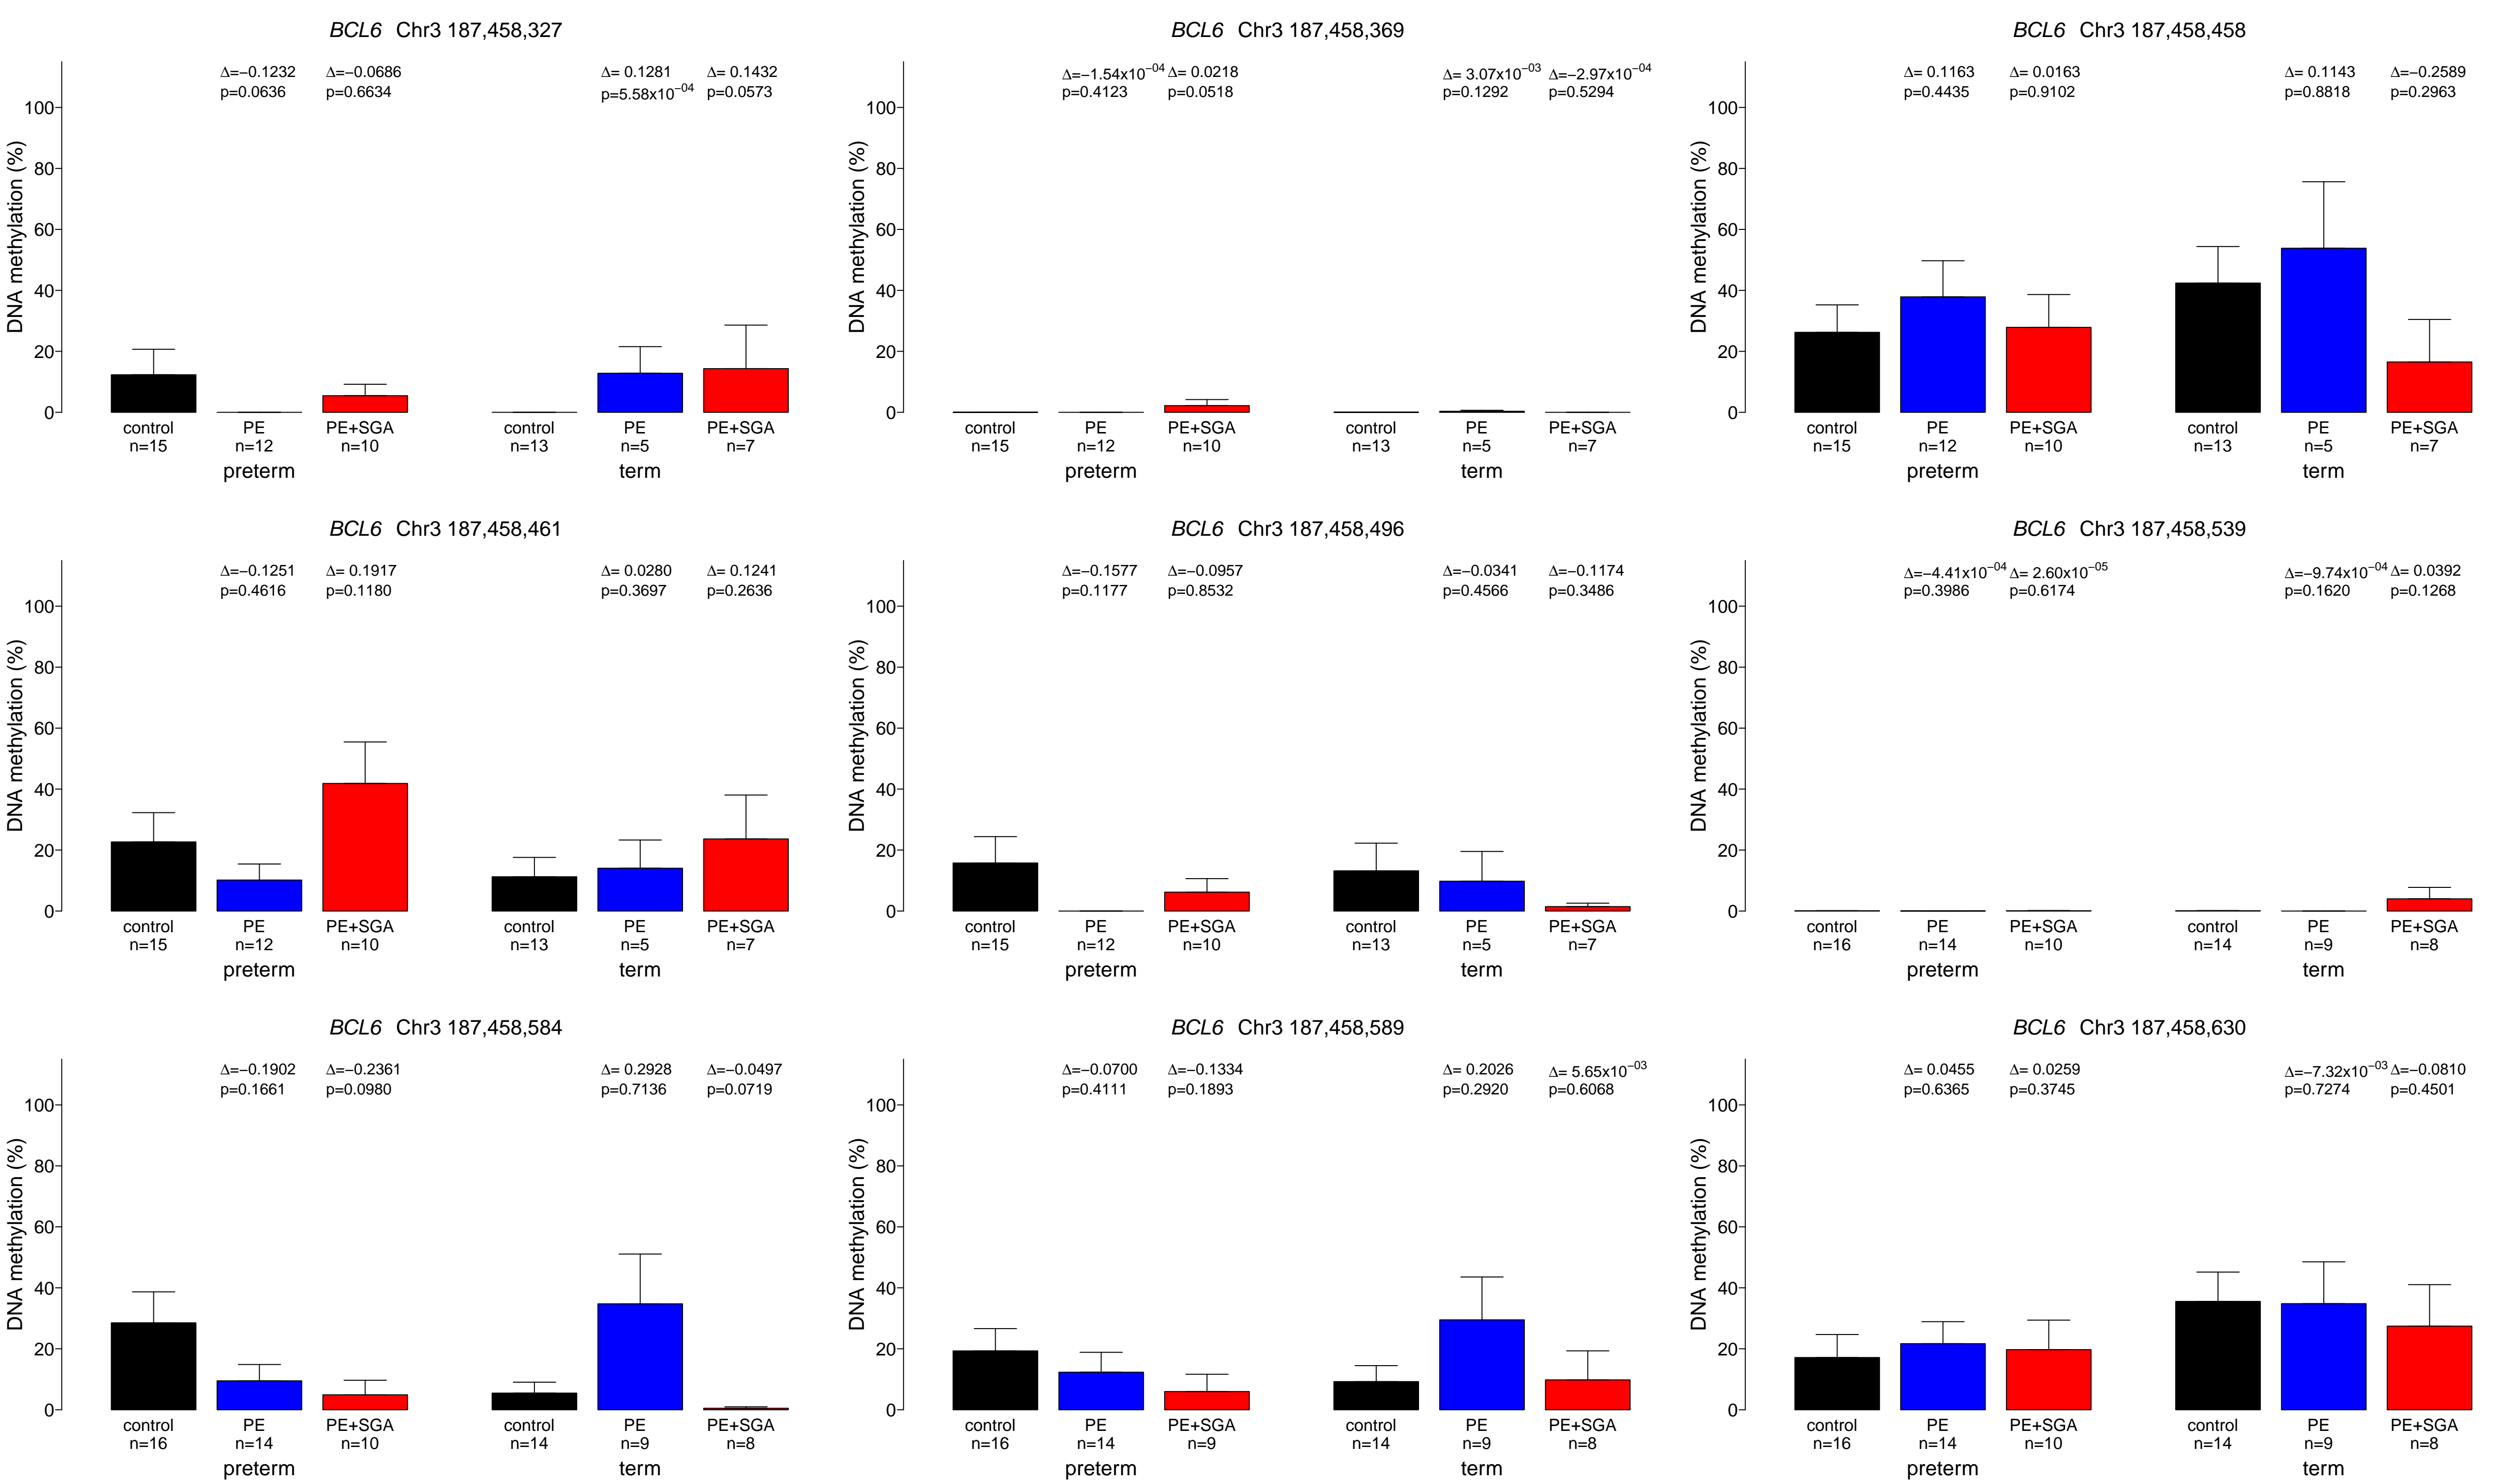

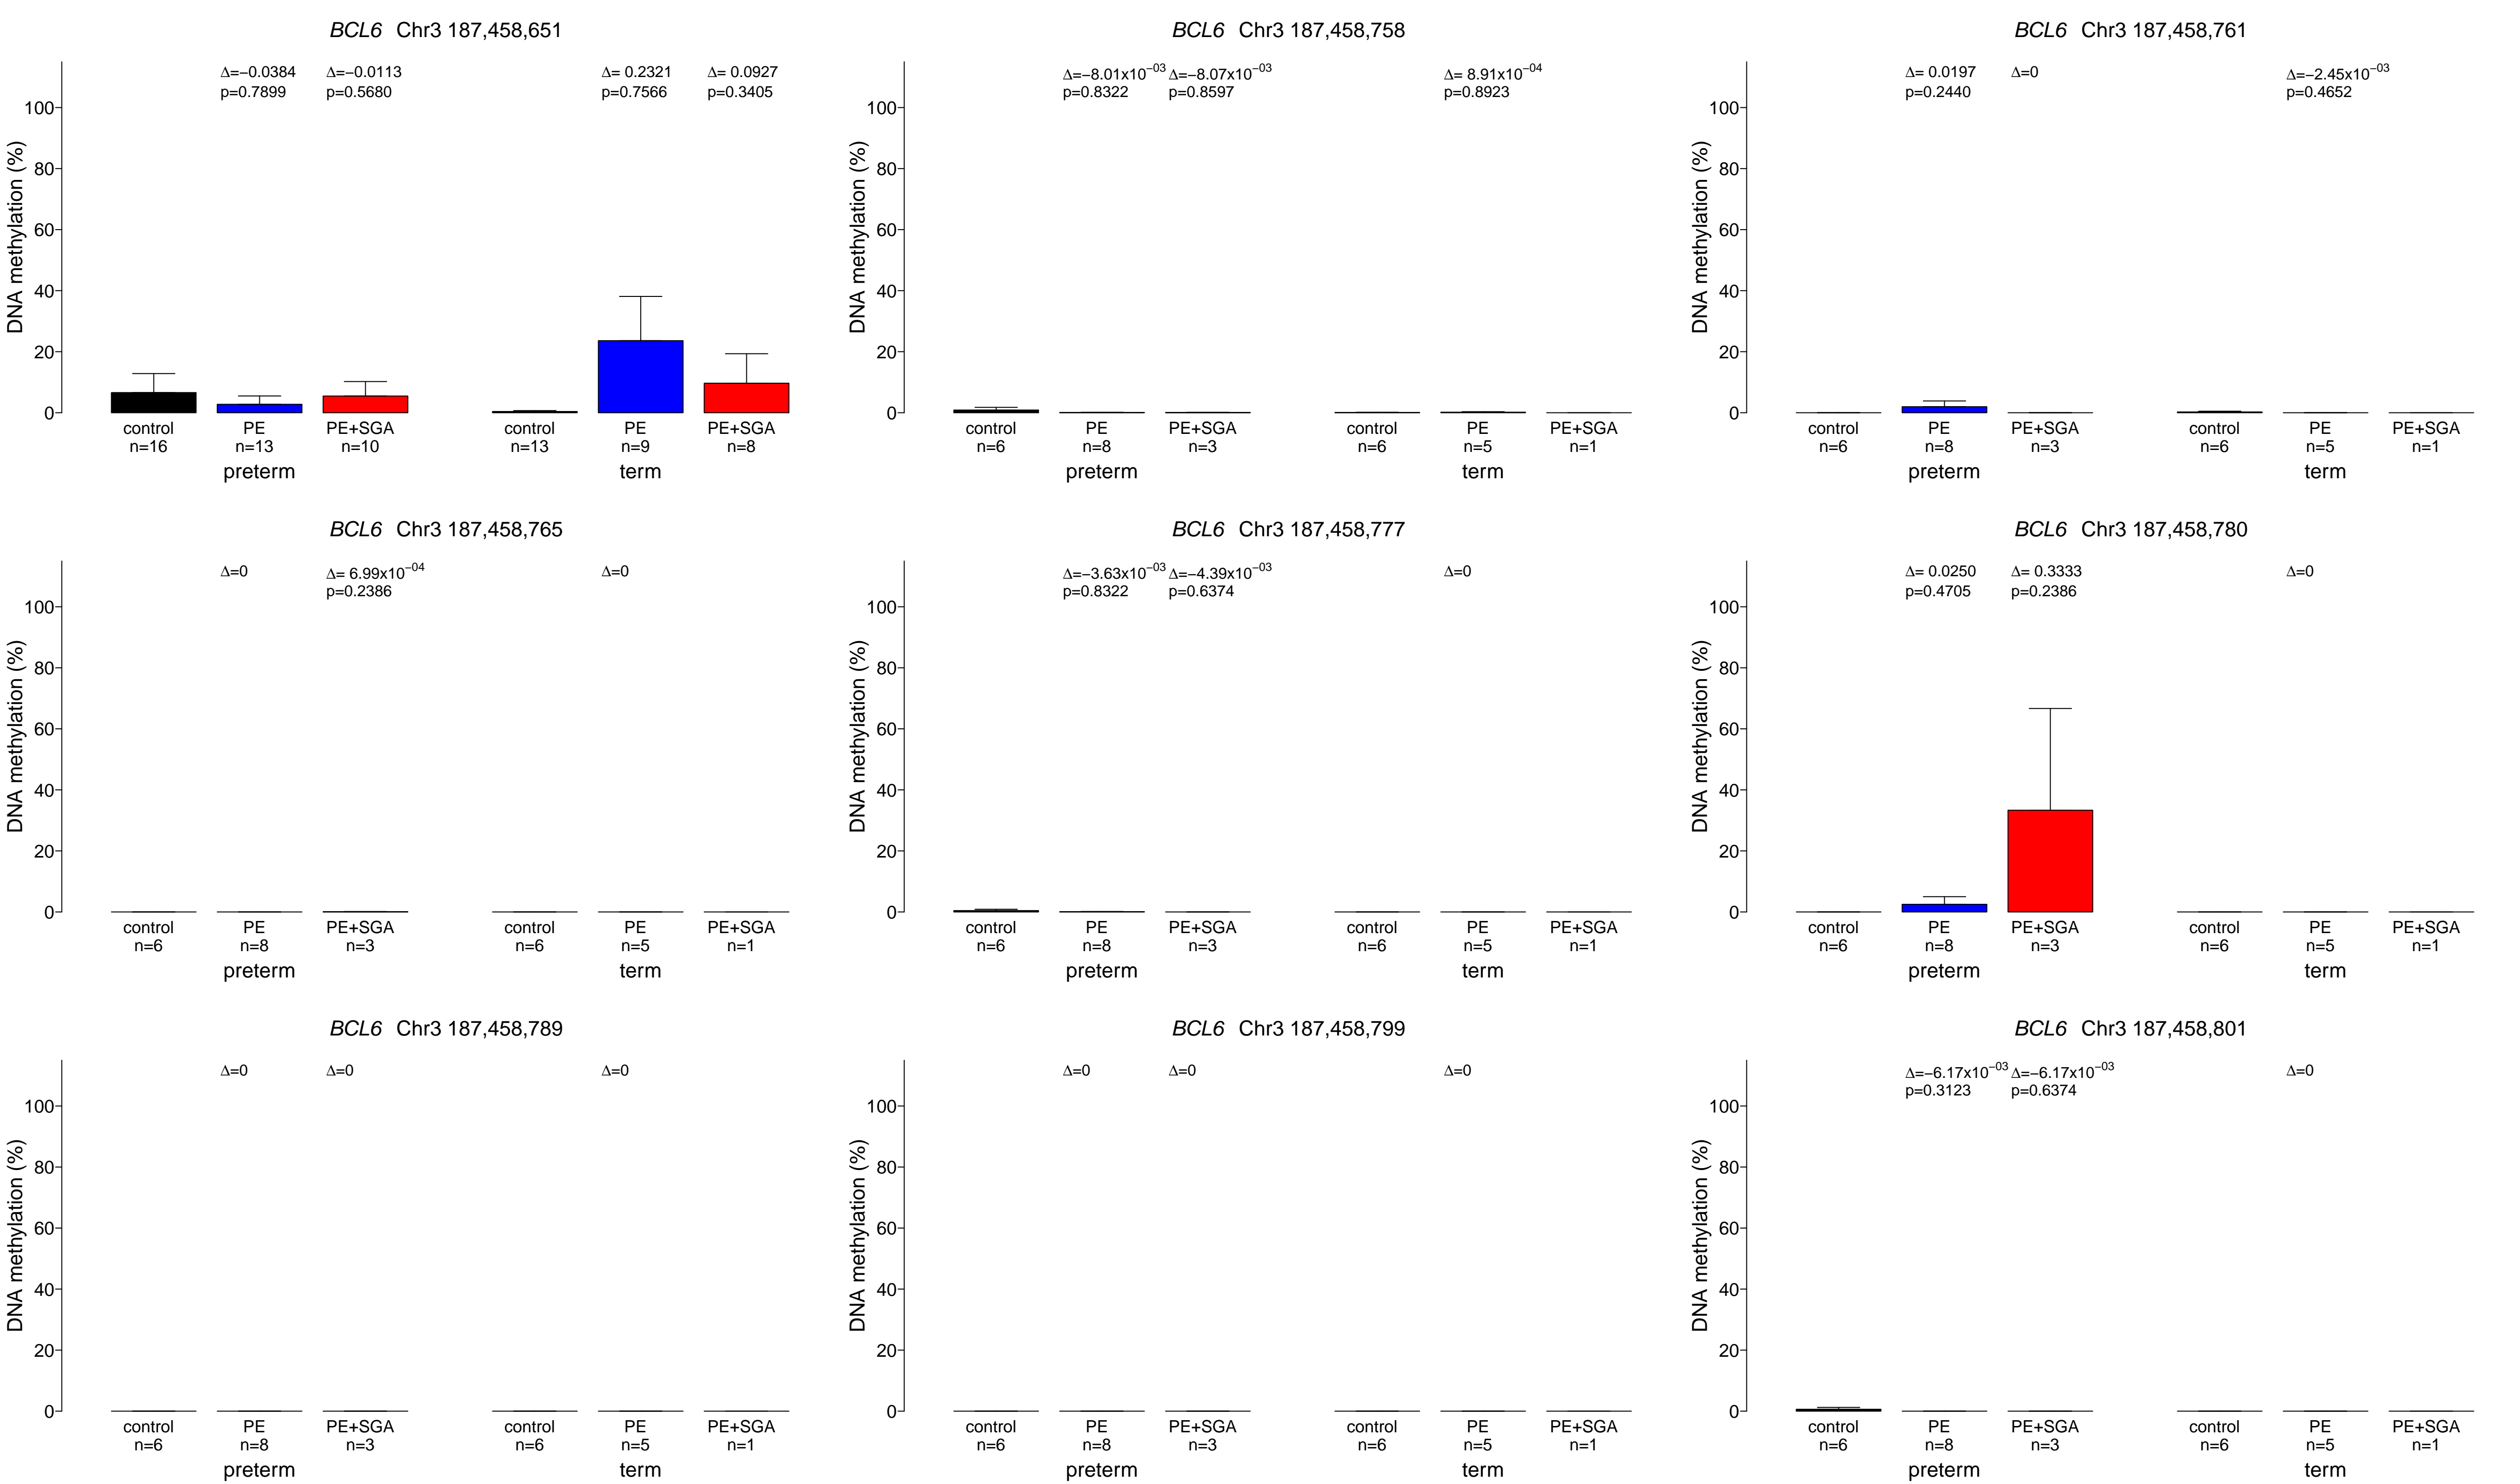

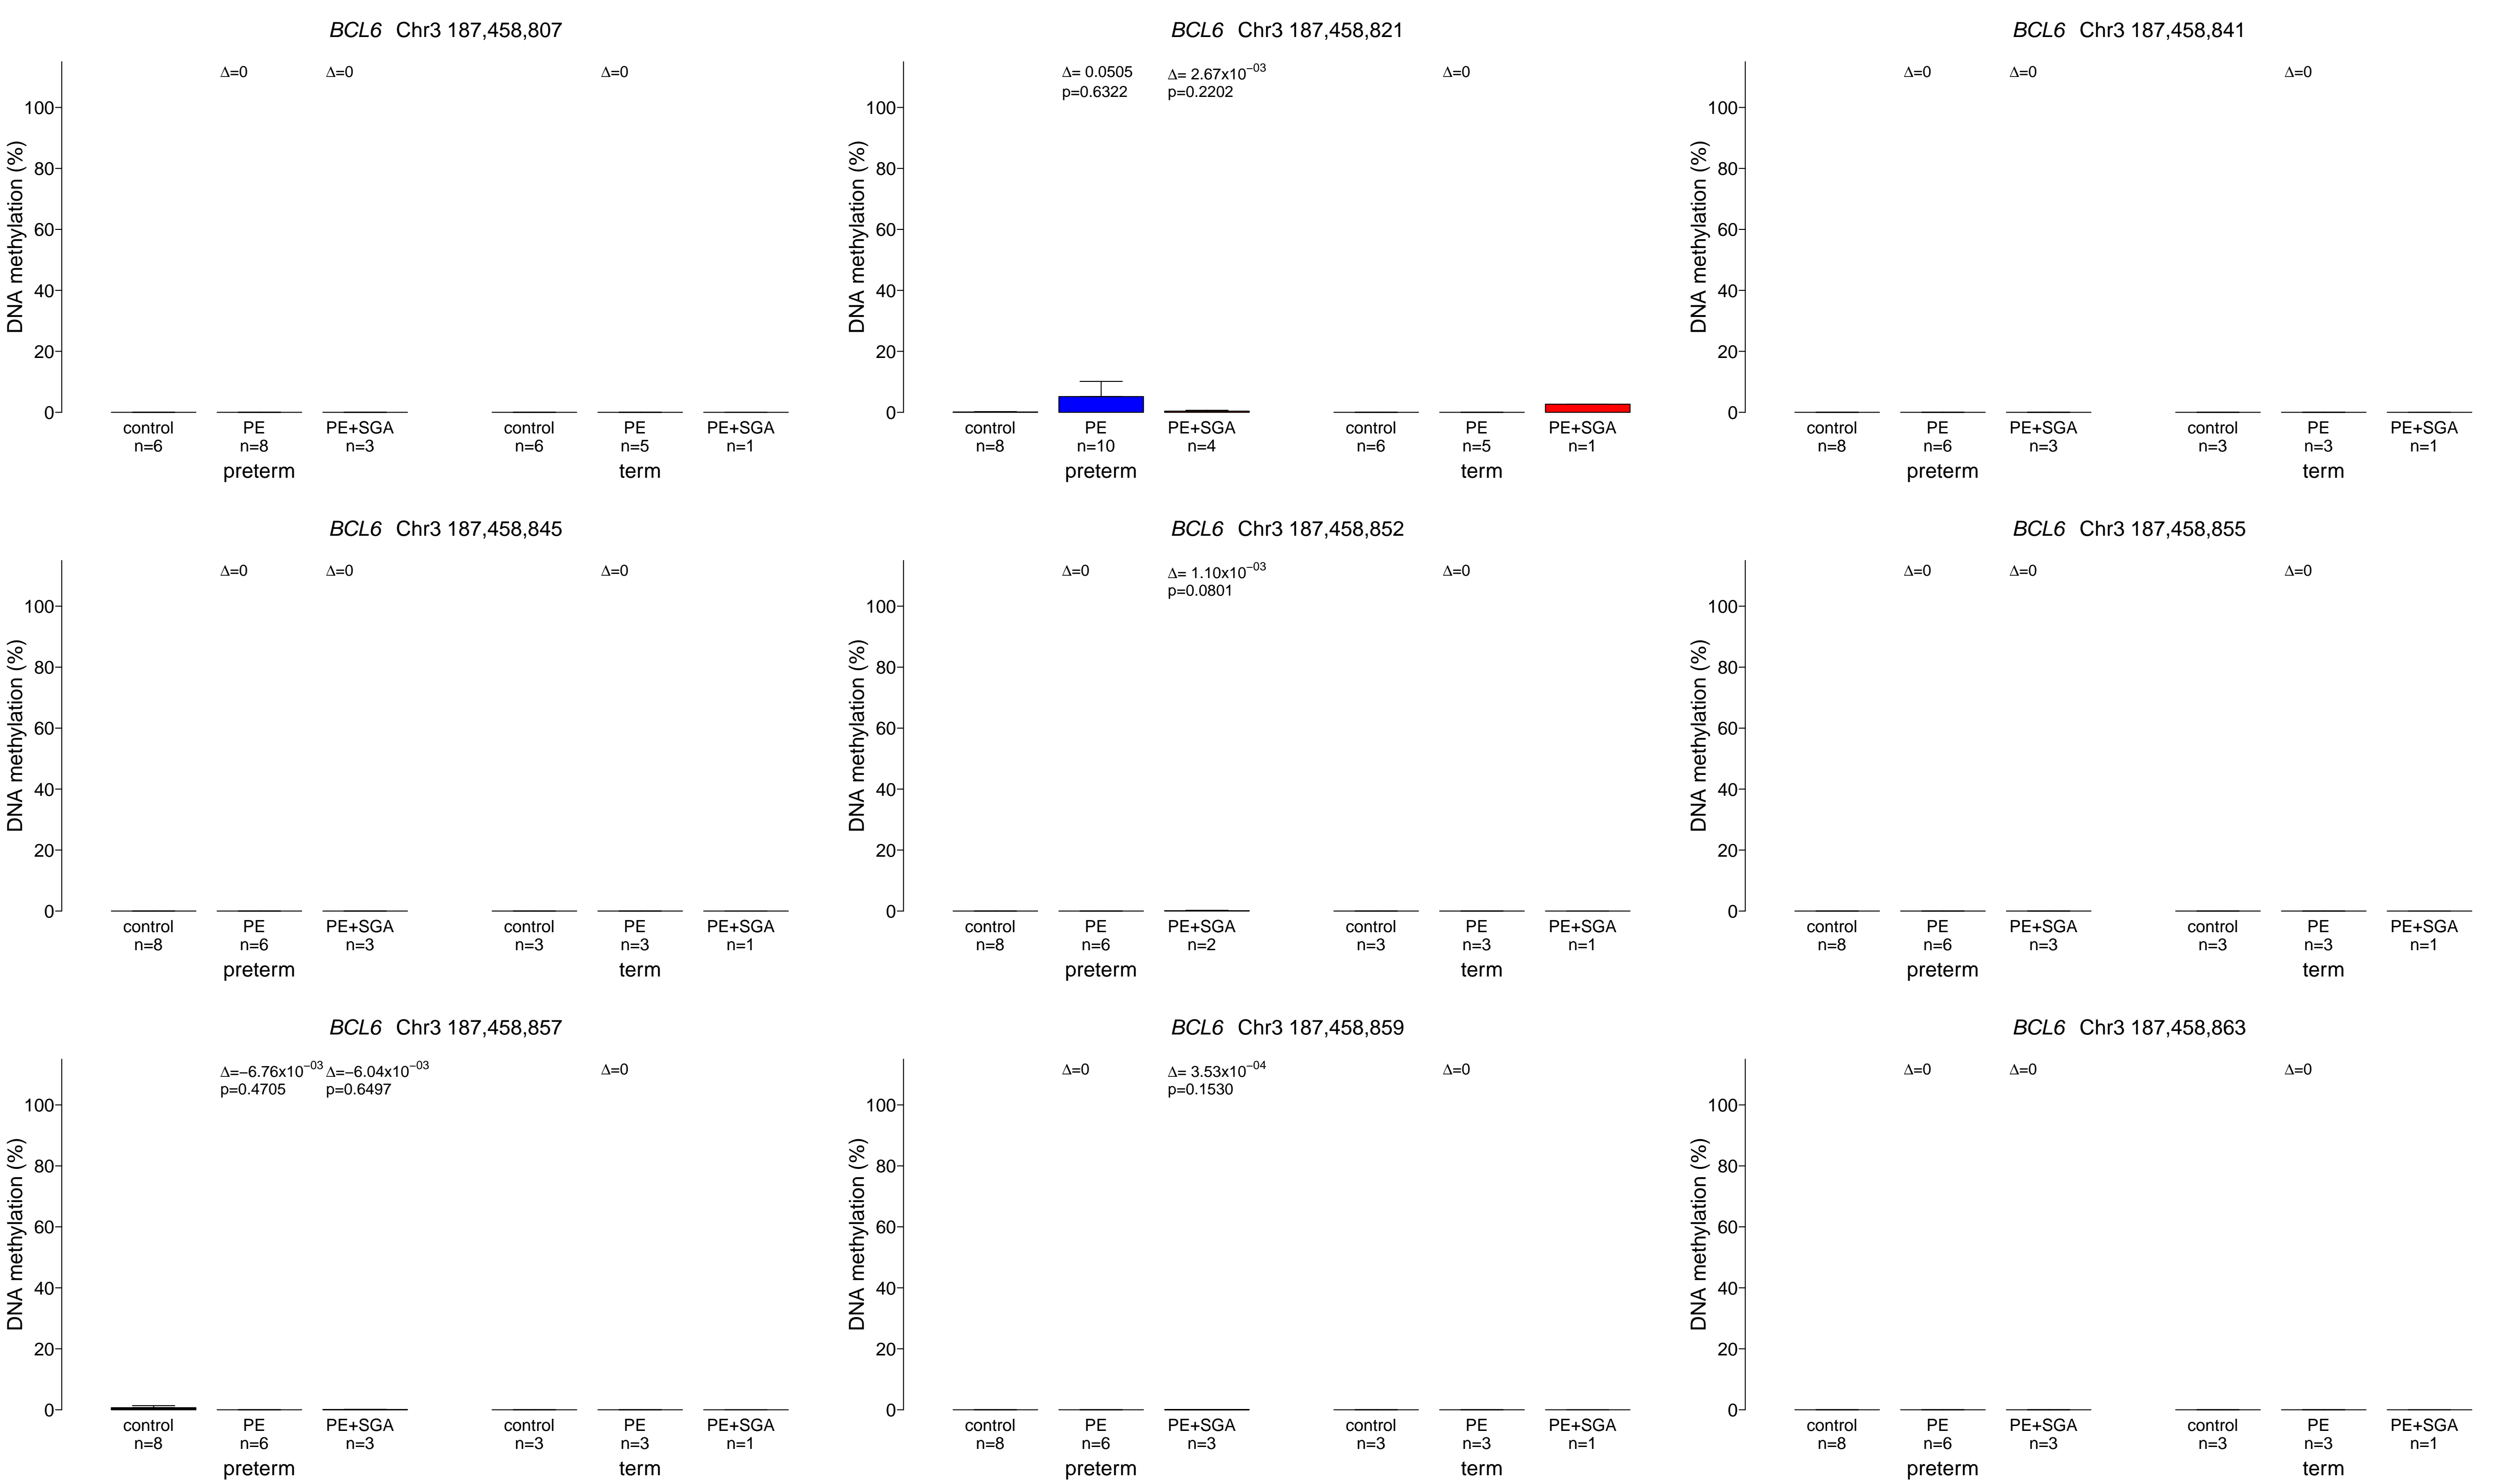

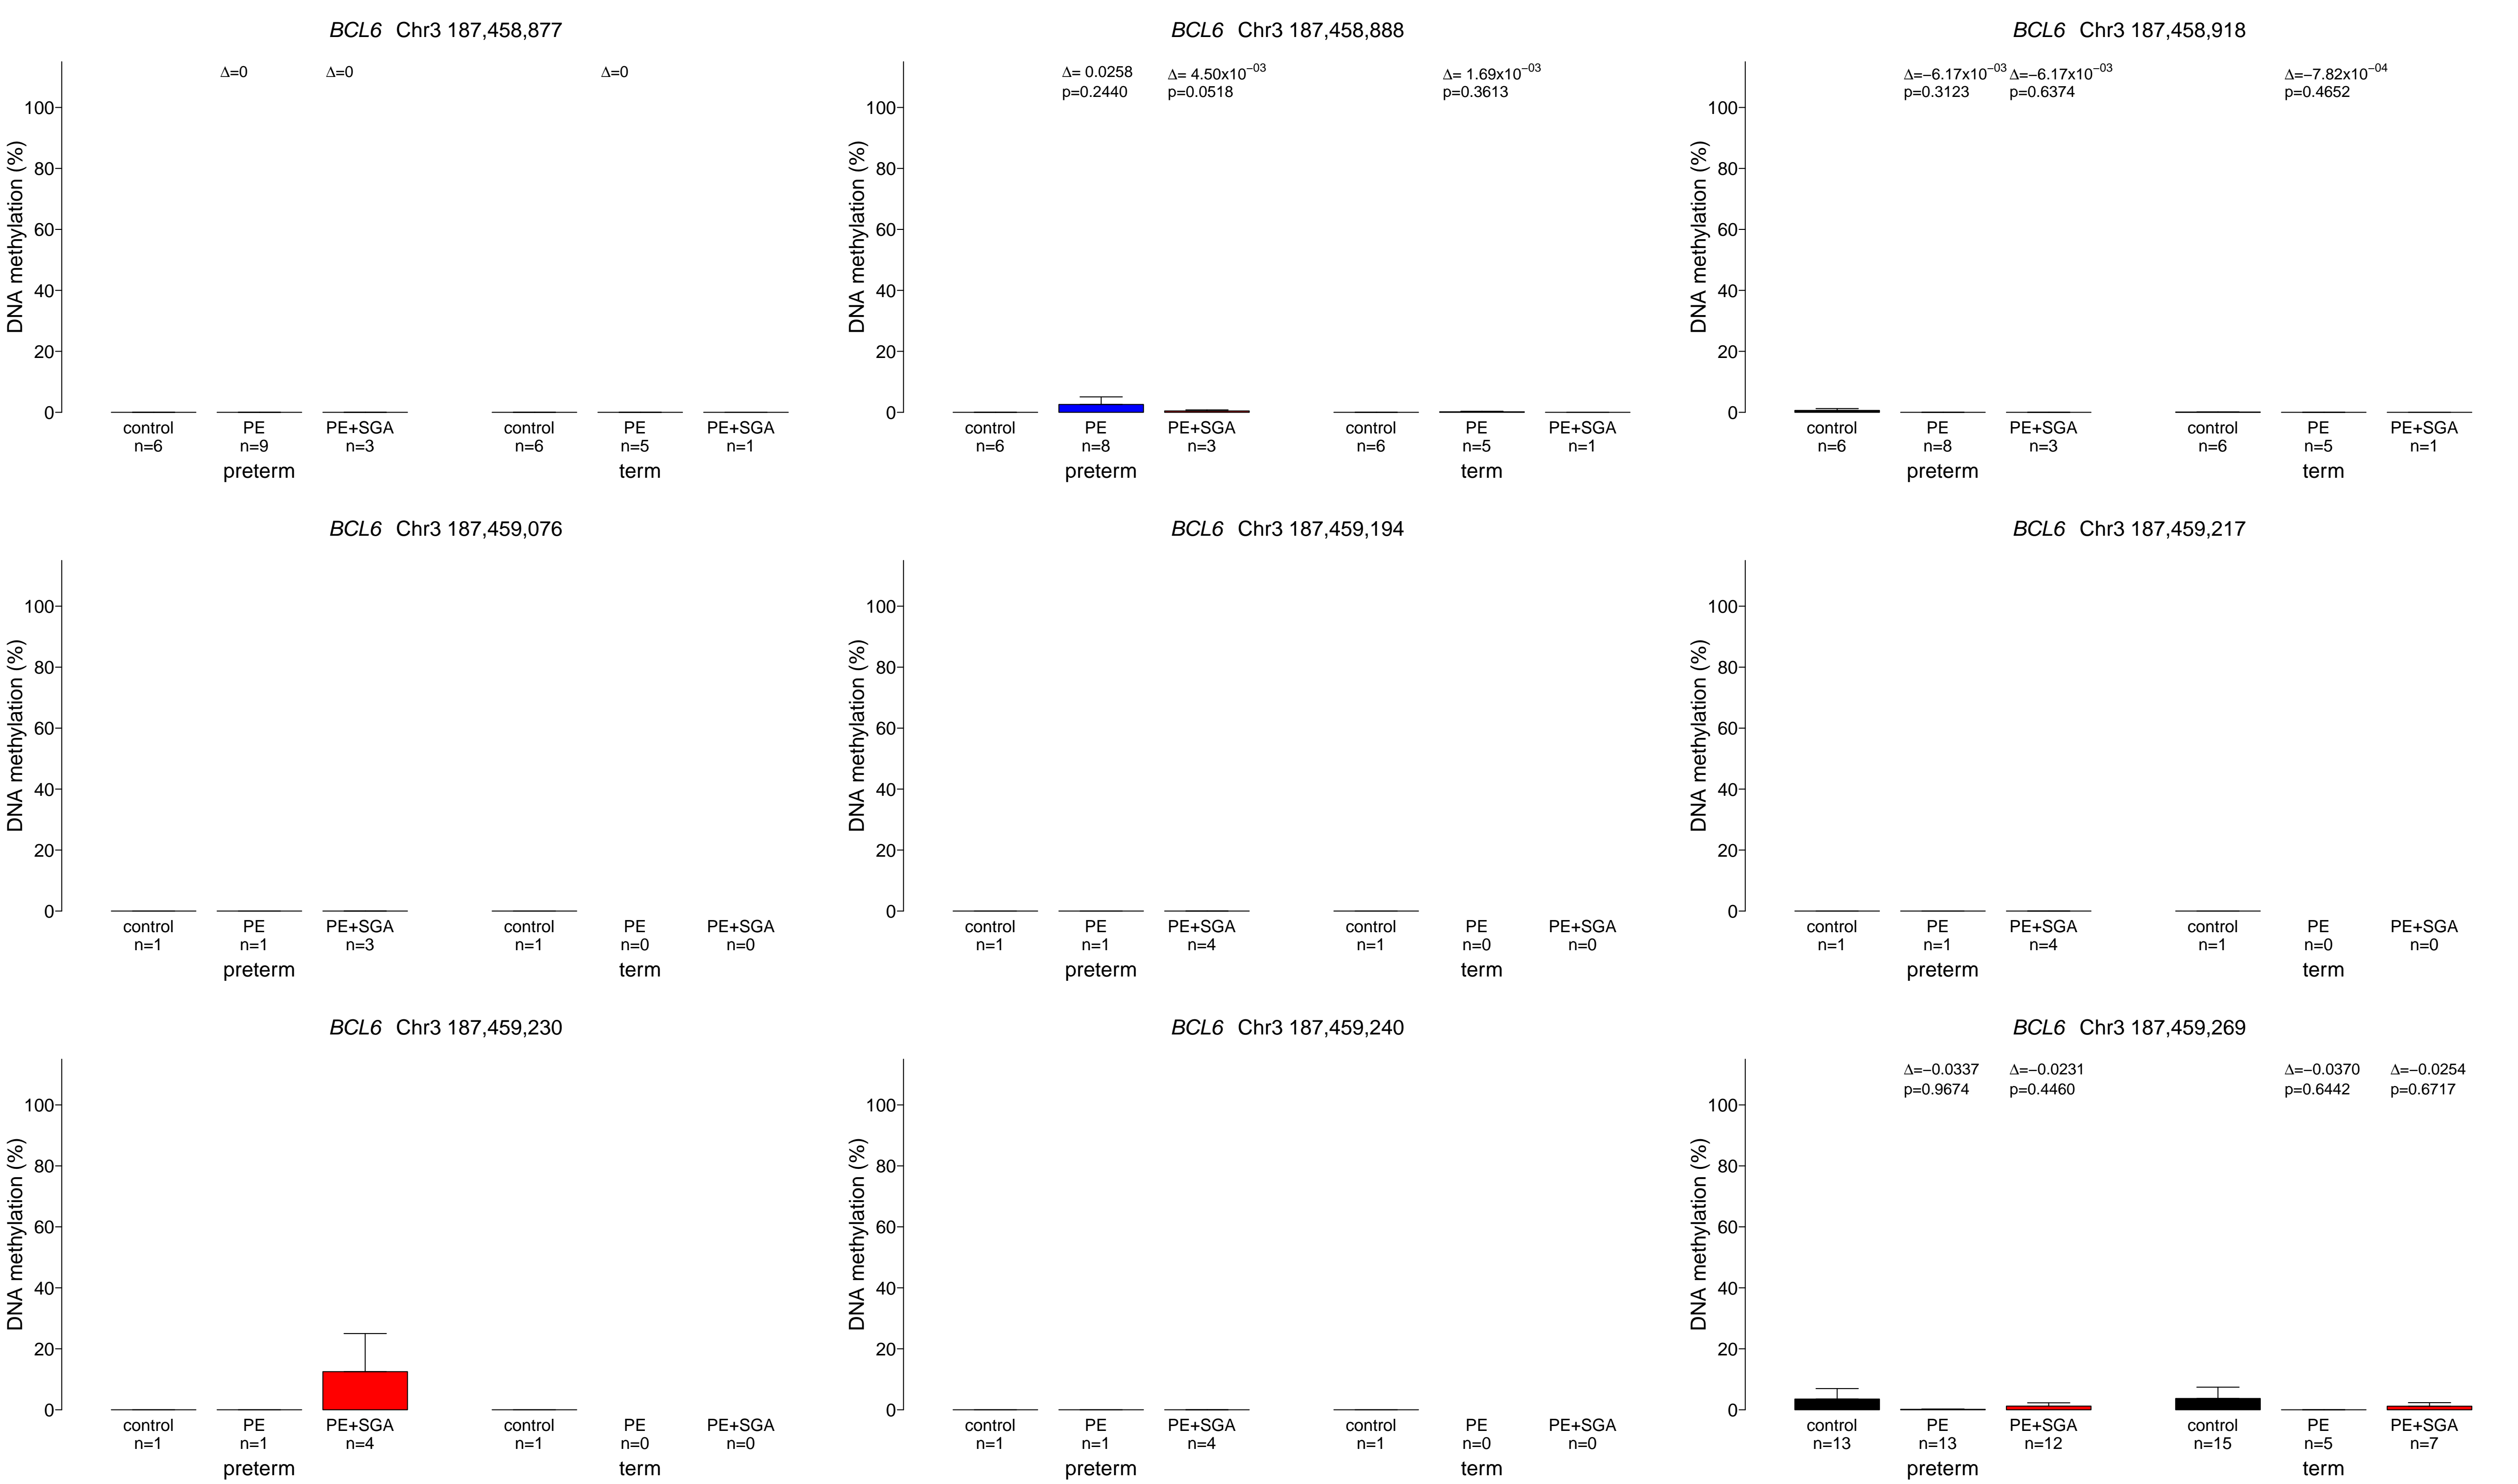

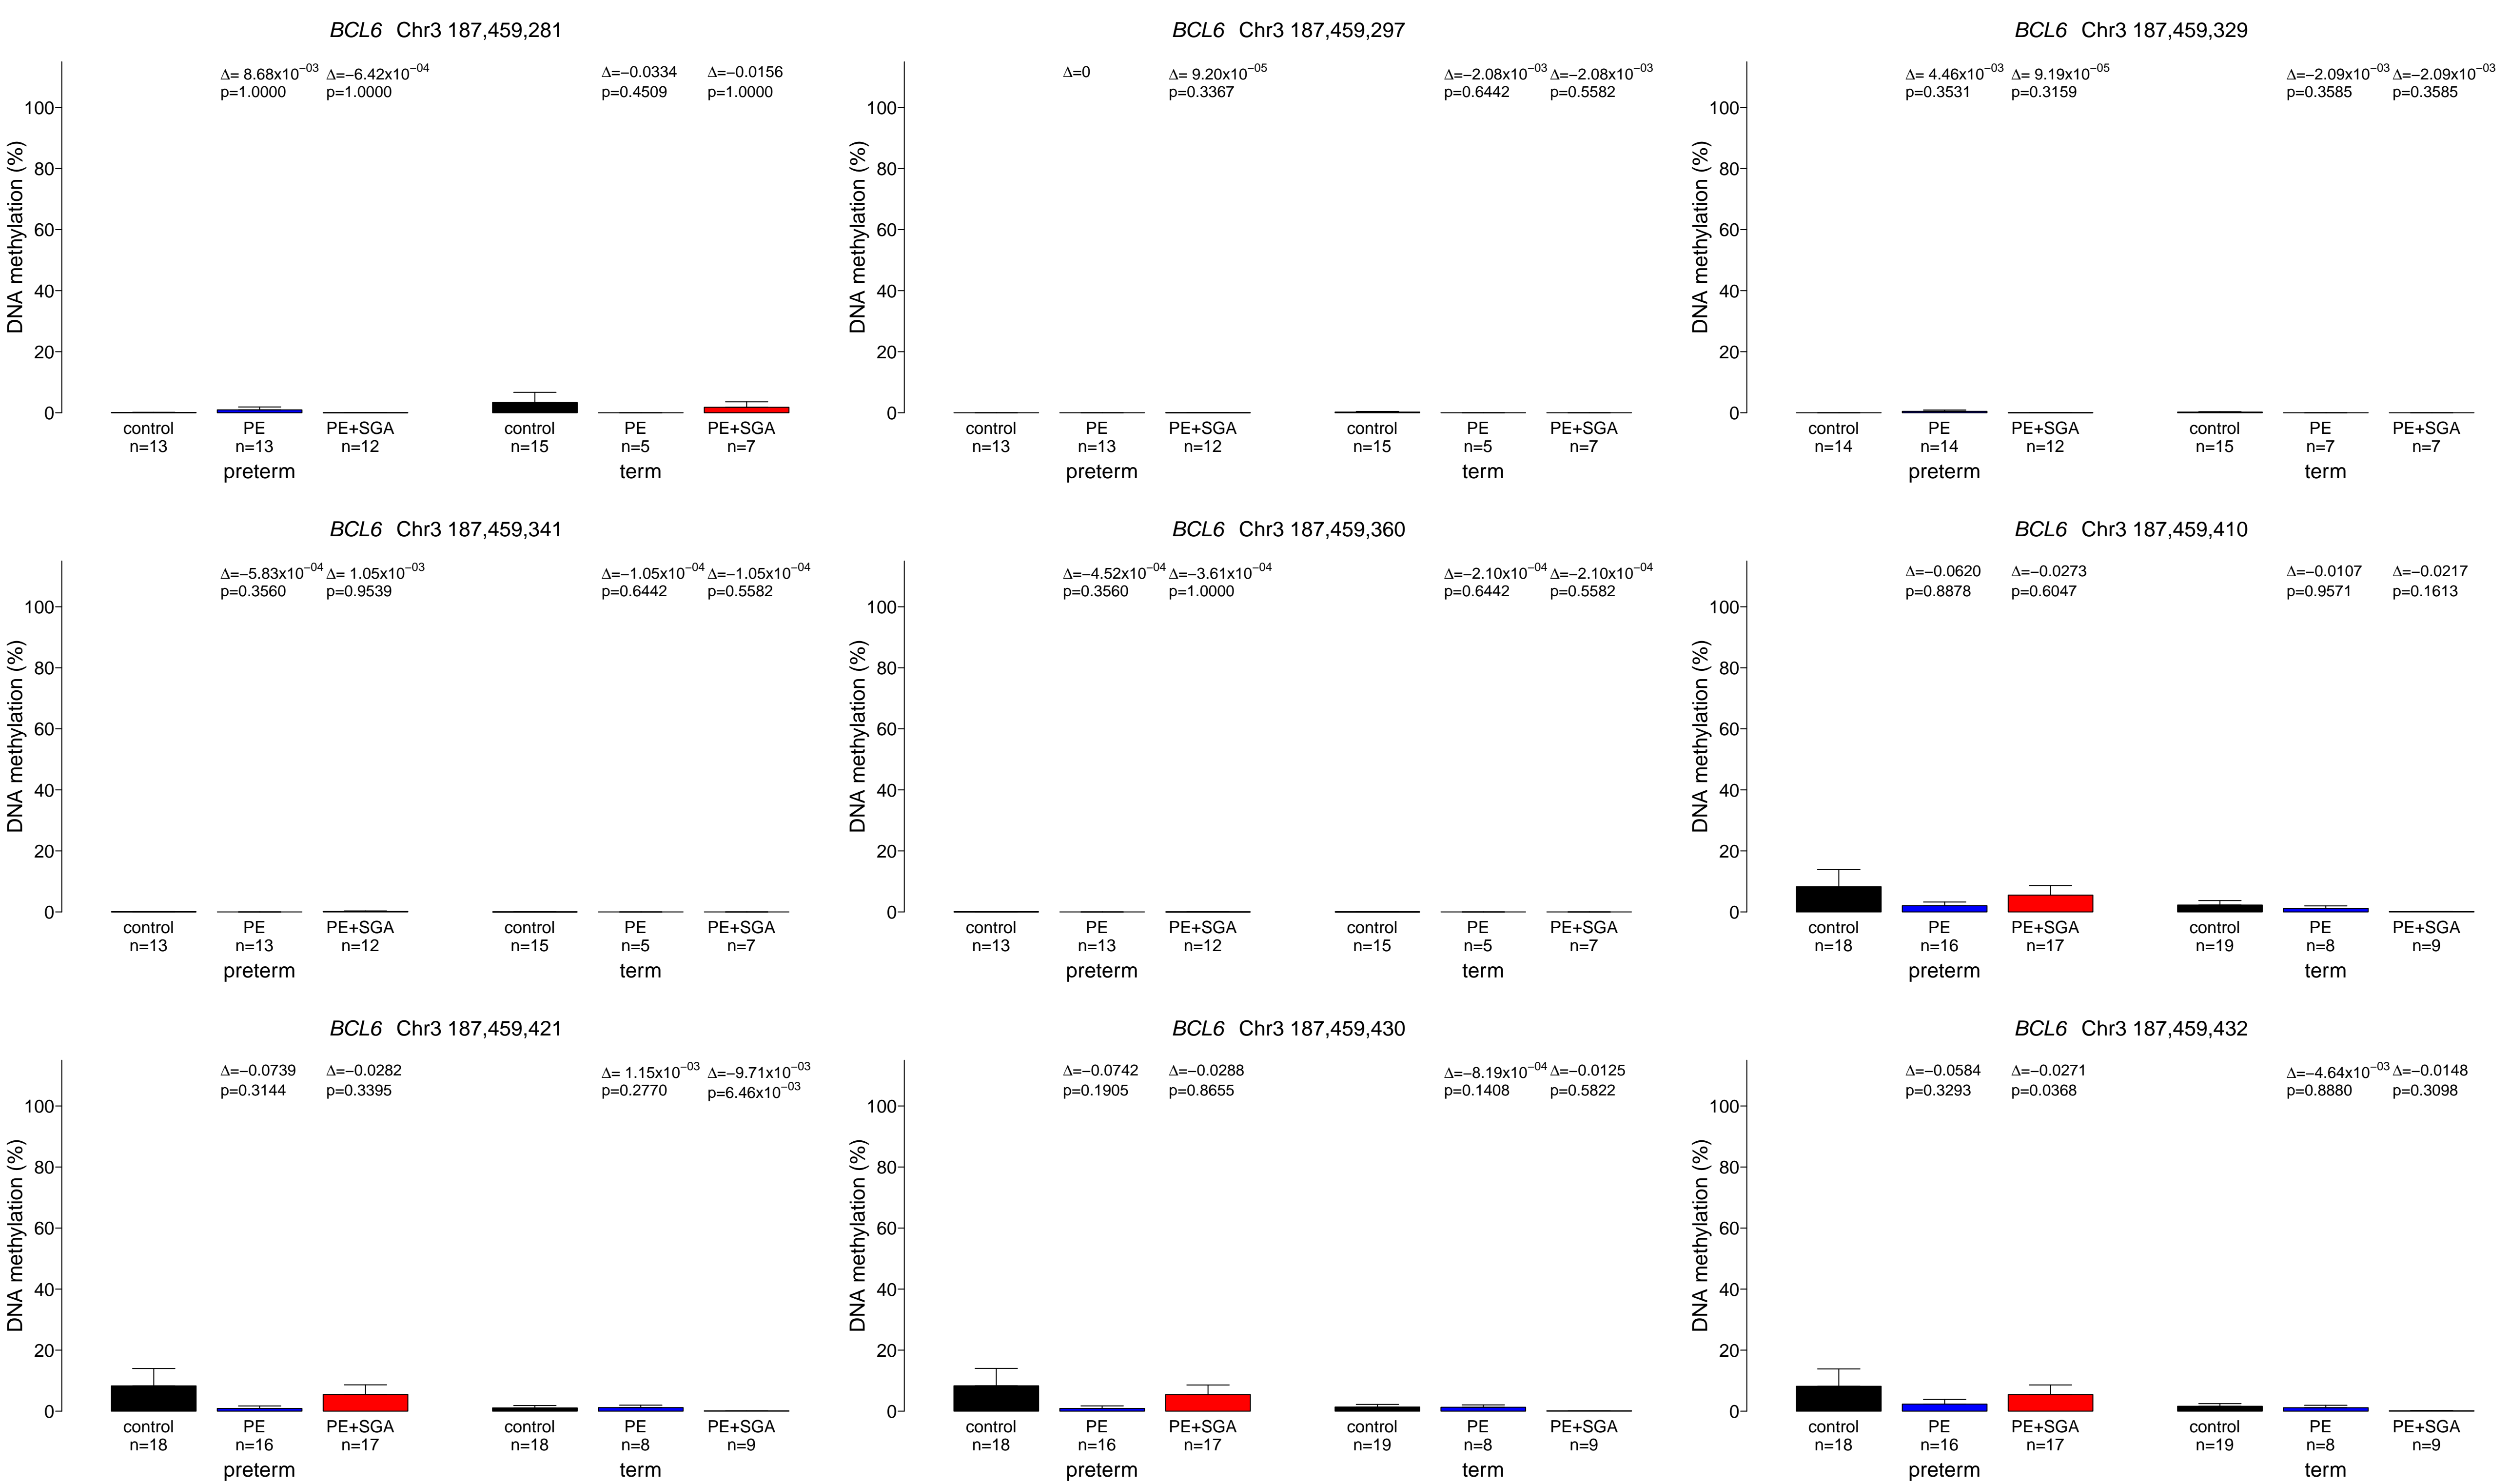

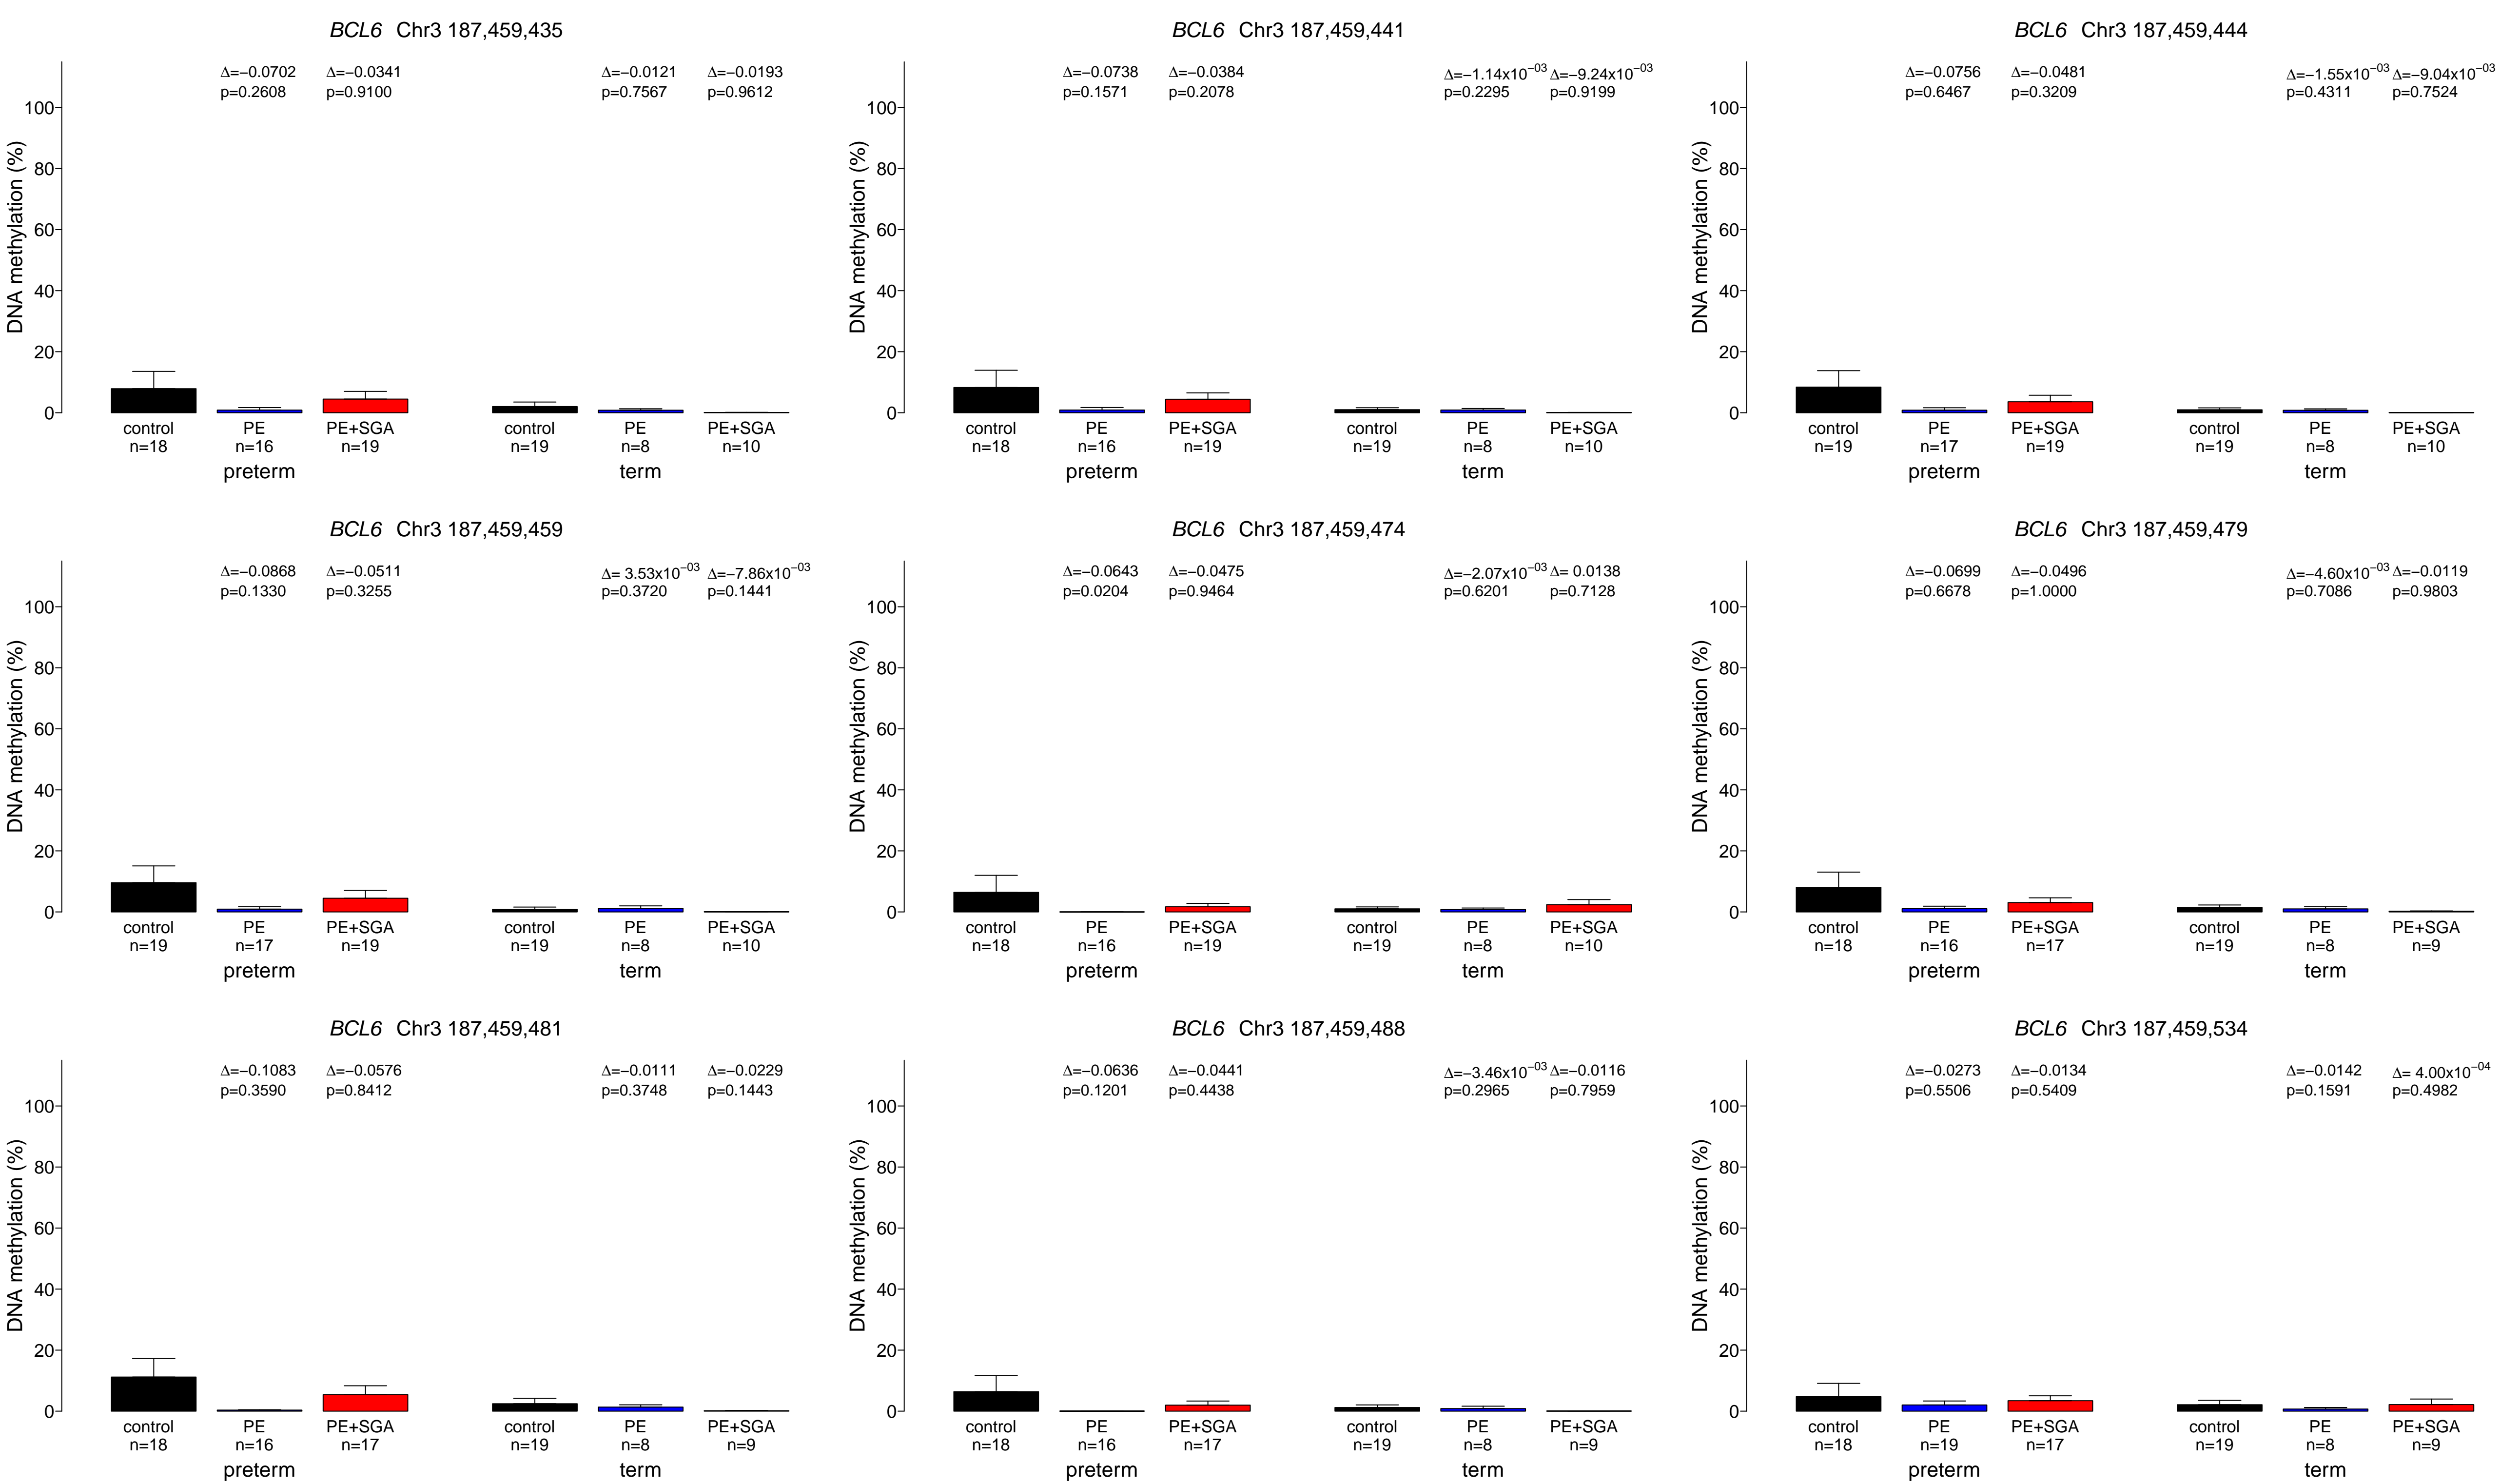



*BCL6* Chr3 187,459,573

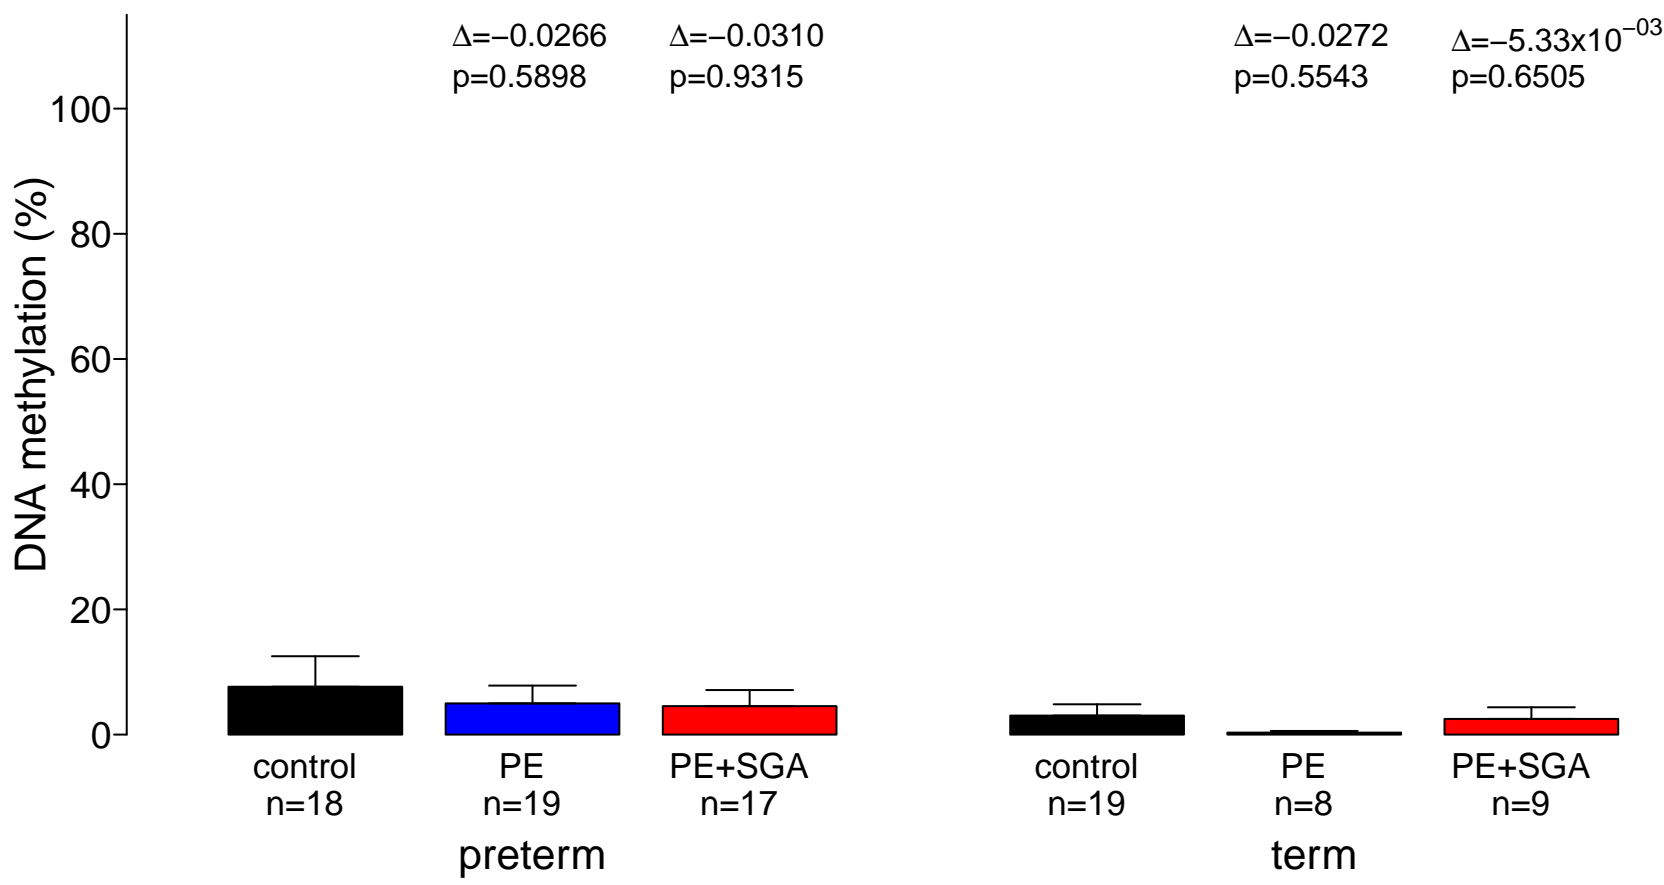

*BCL6* Chr3 187,459,584

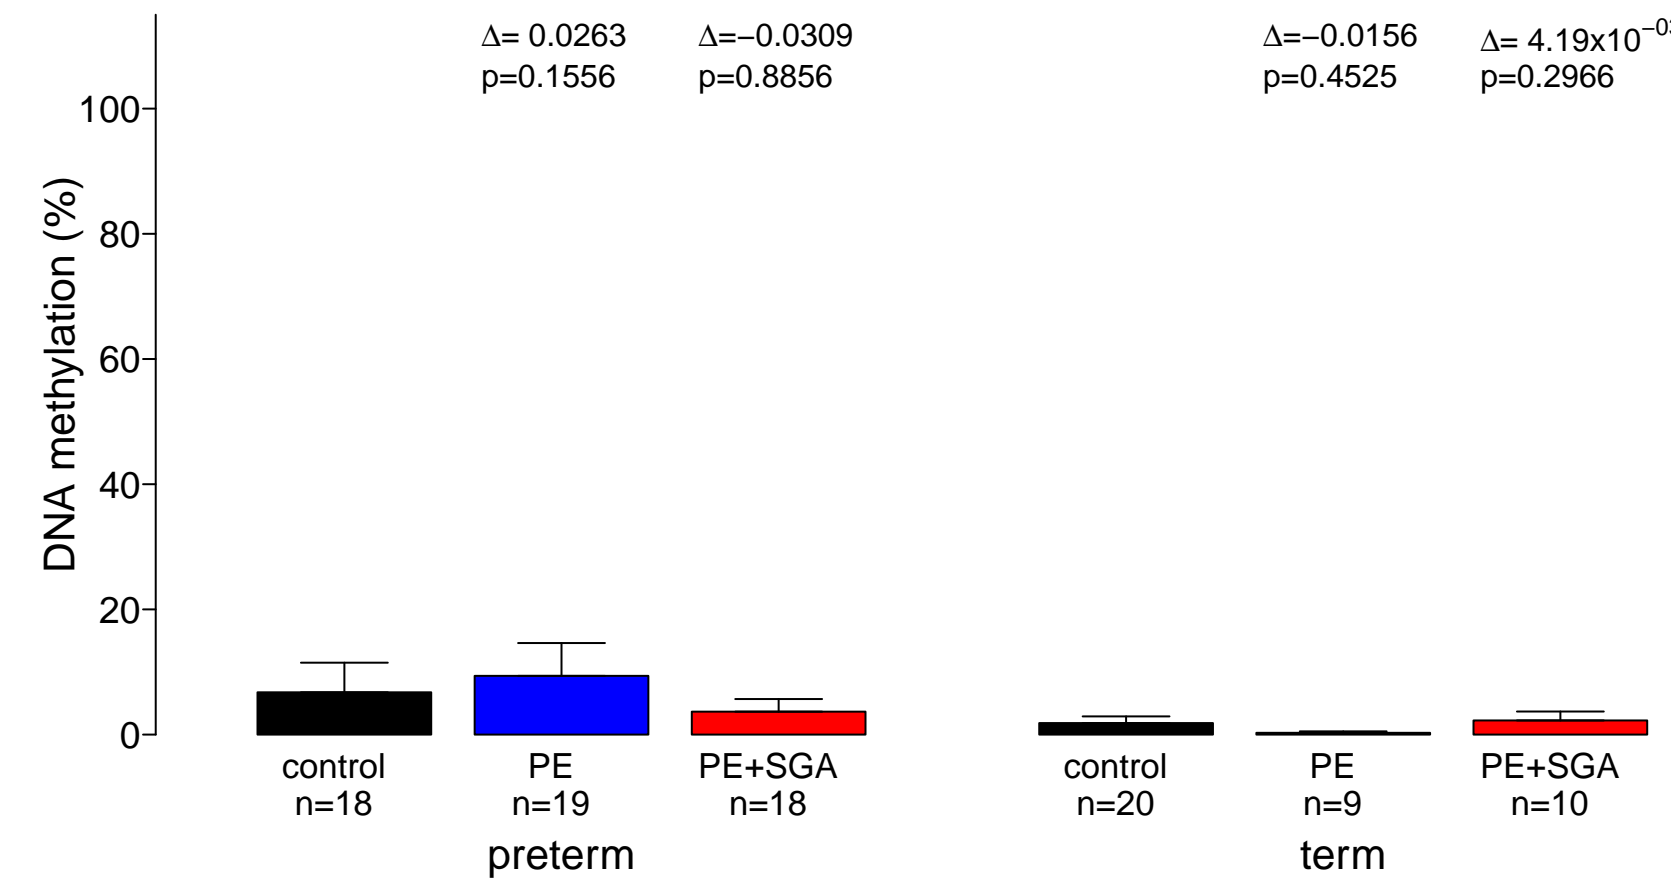

*BCL6* Chr3 187,459,587

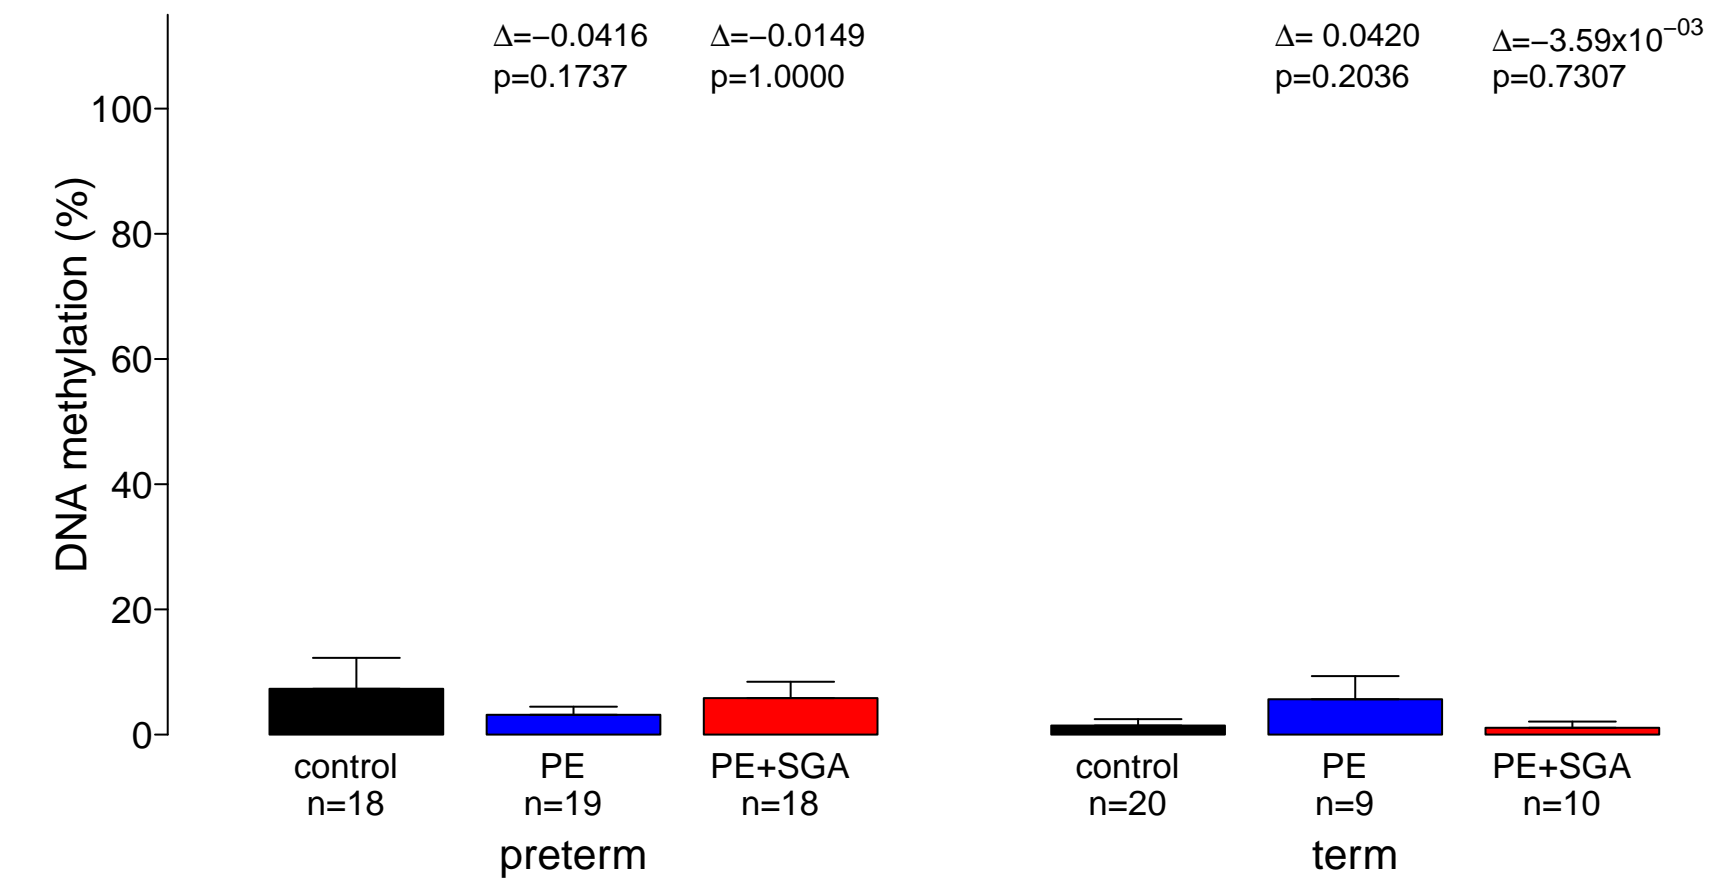

*BCL6* Chr3 187,459,649

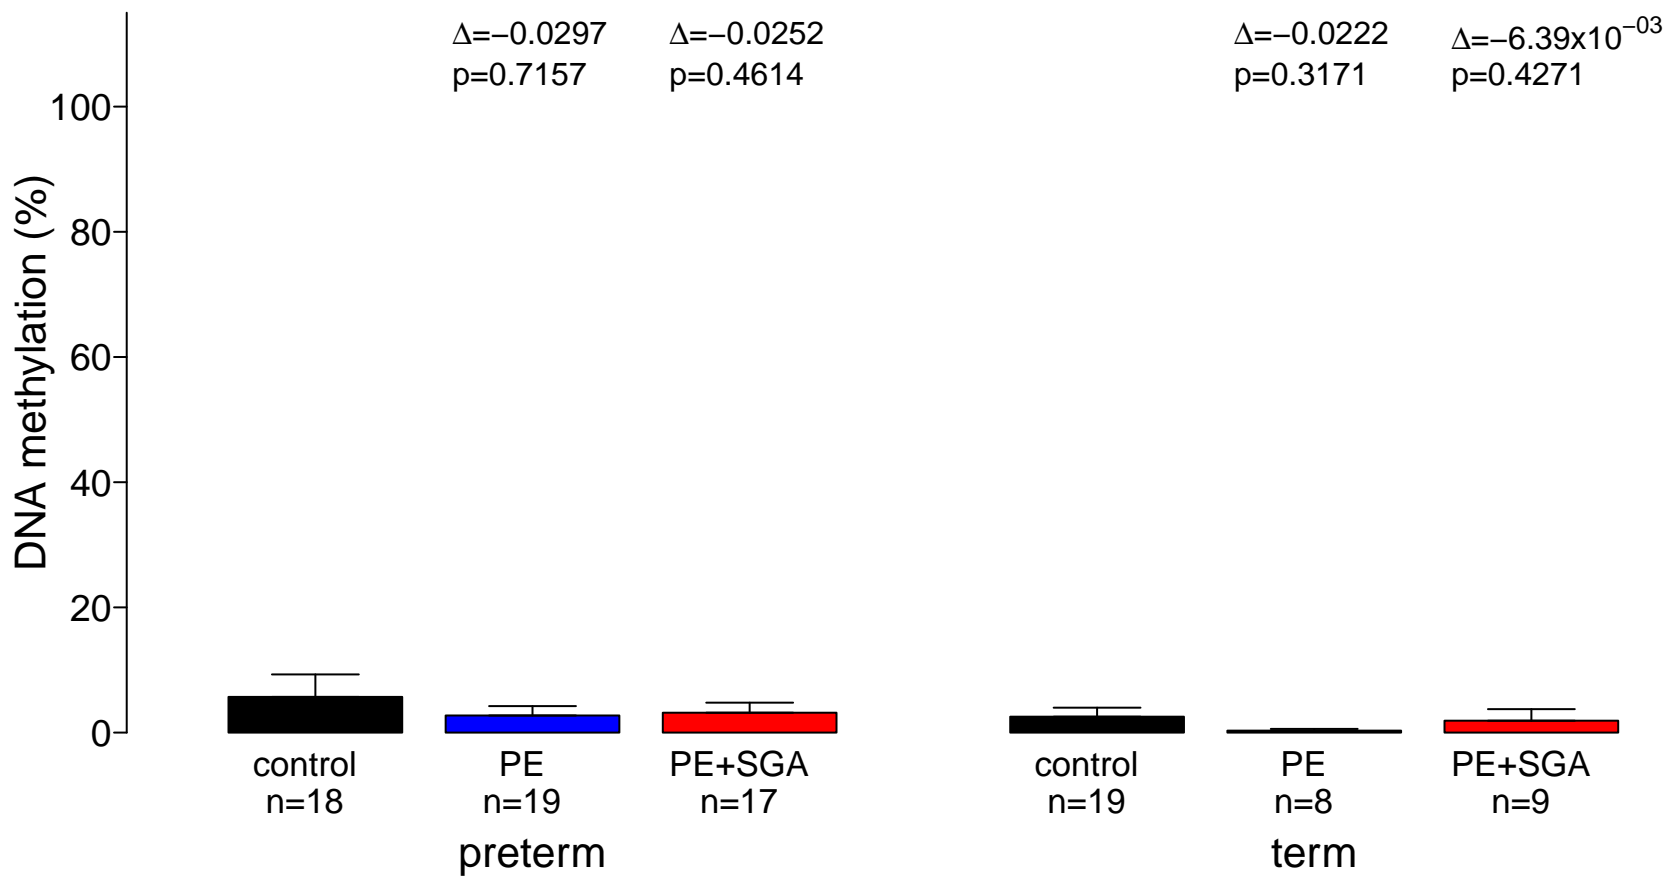

*BCL6* Chr3 187,459,707

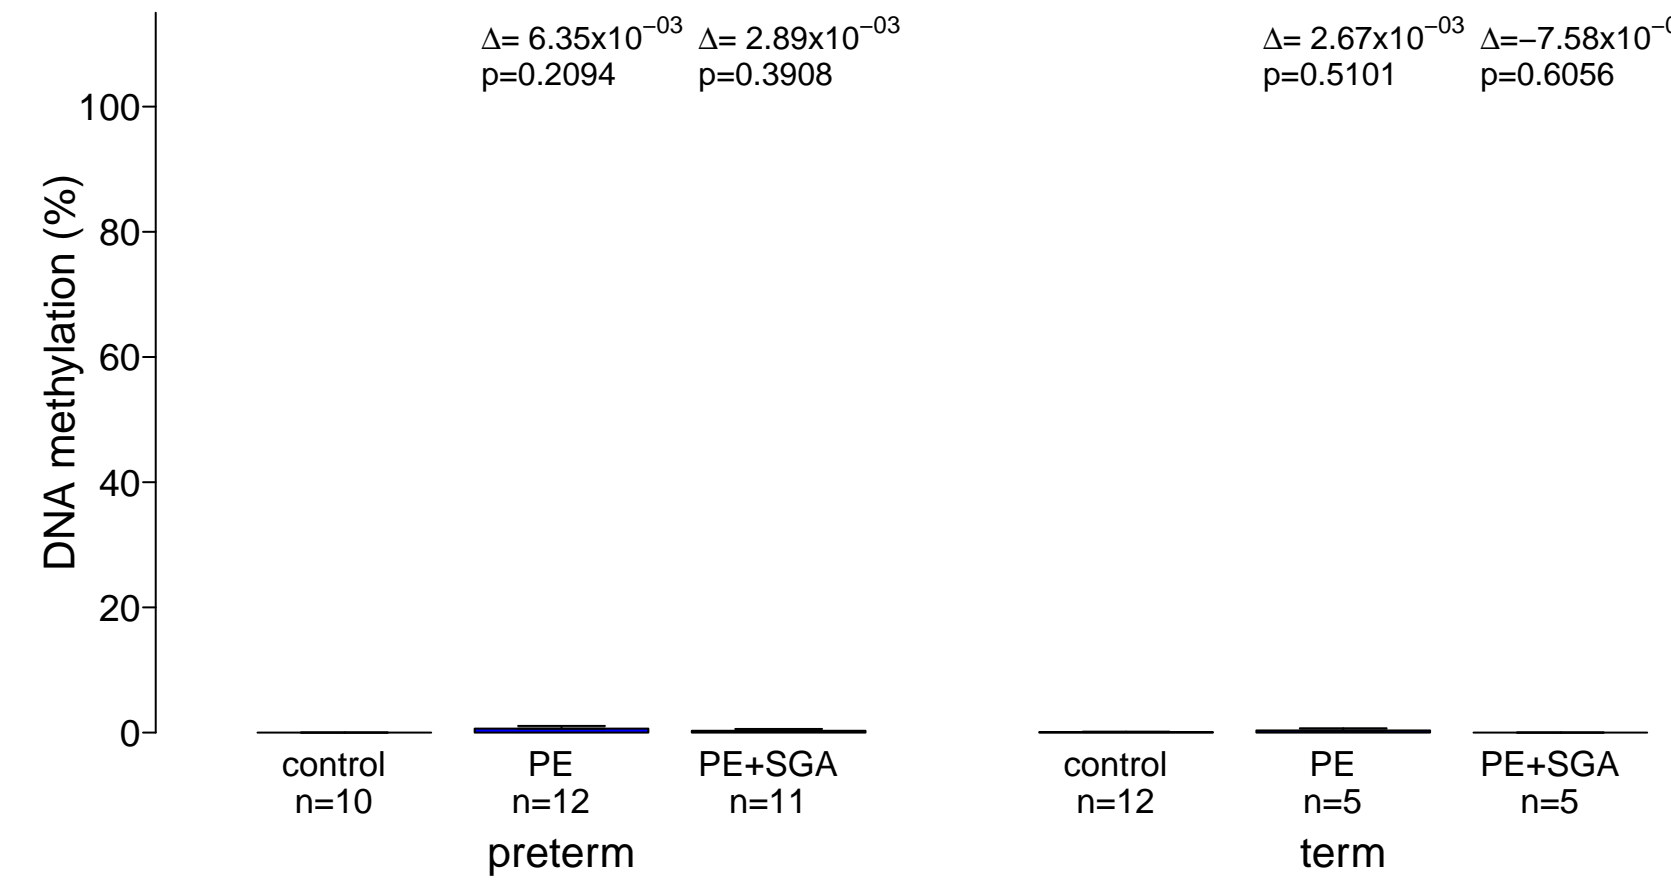

*BCL6* Chr3 187,459,718

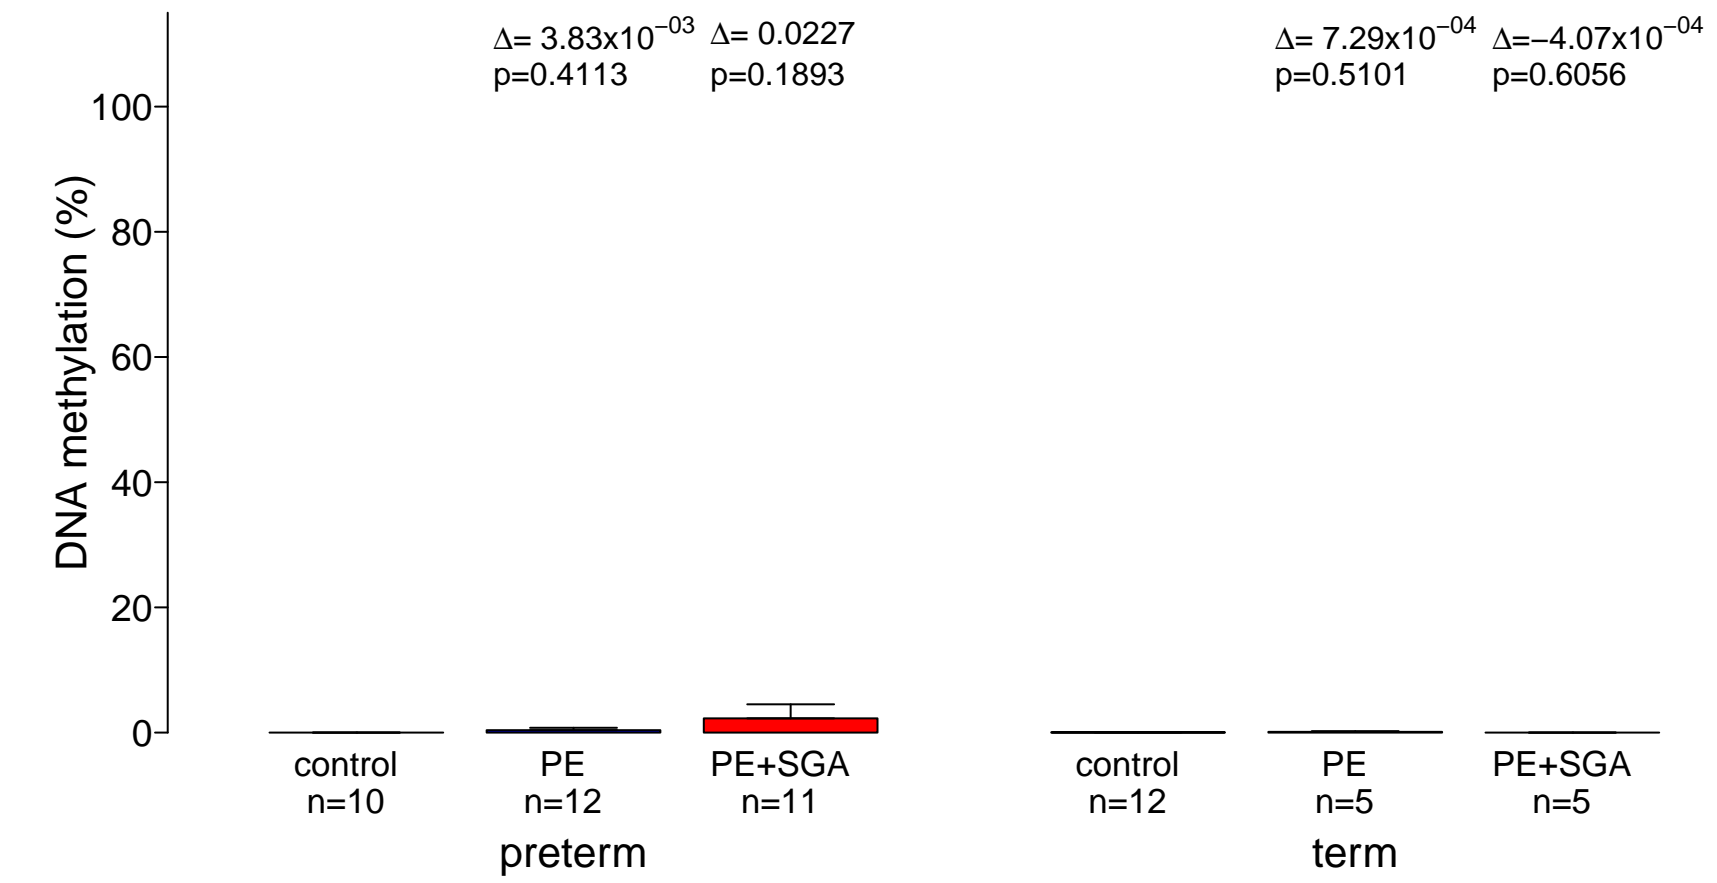

*BCL6* Chr3 187,459,790

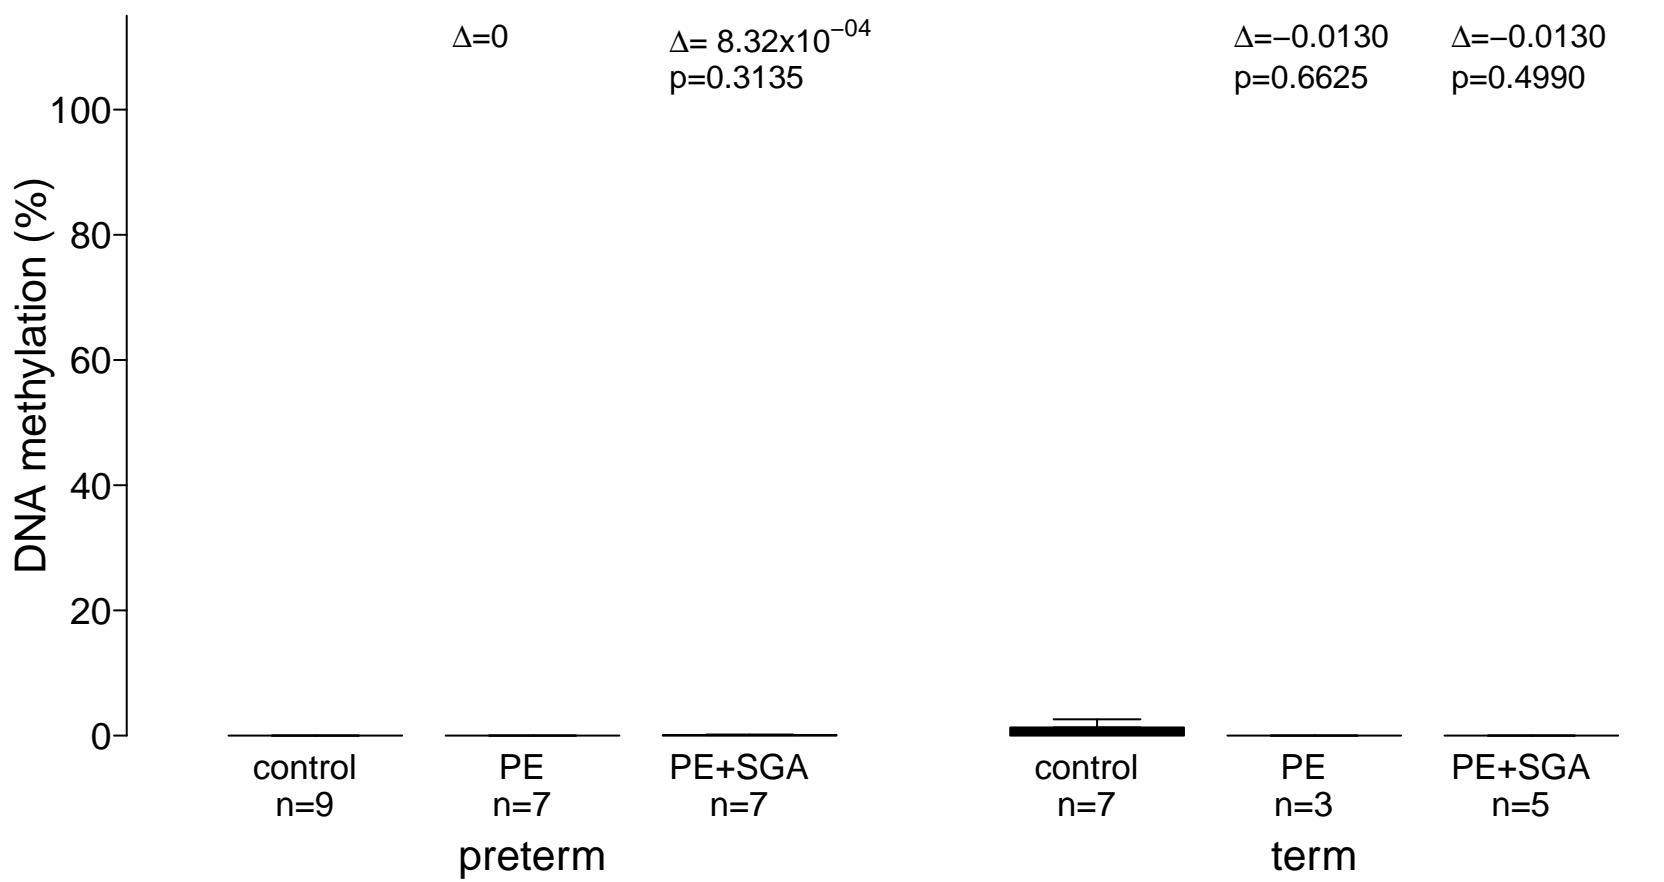

*BCL6* Chr3 187,459,870

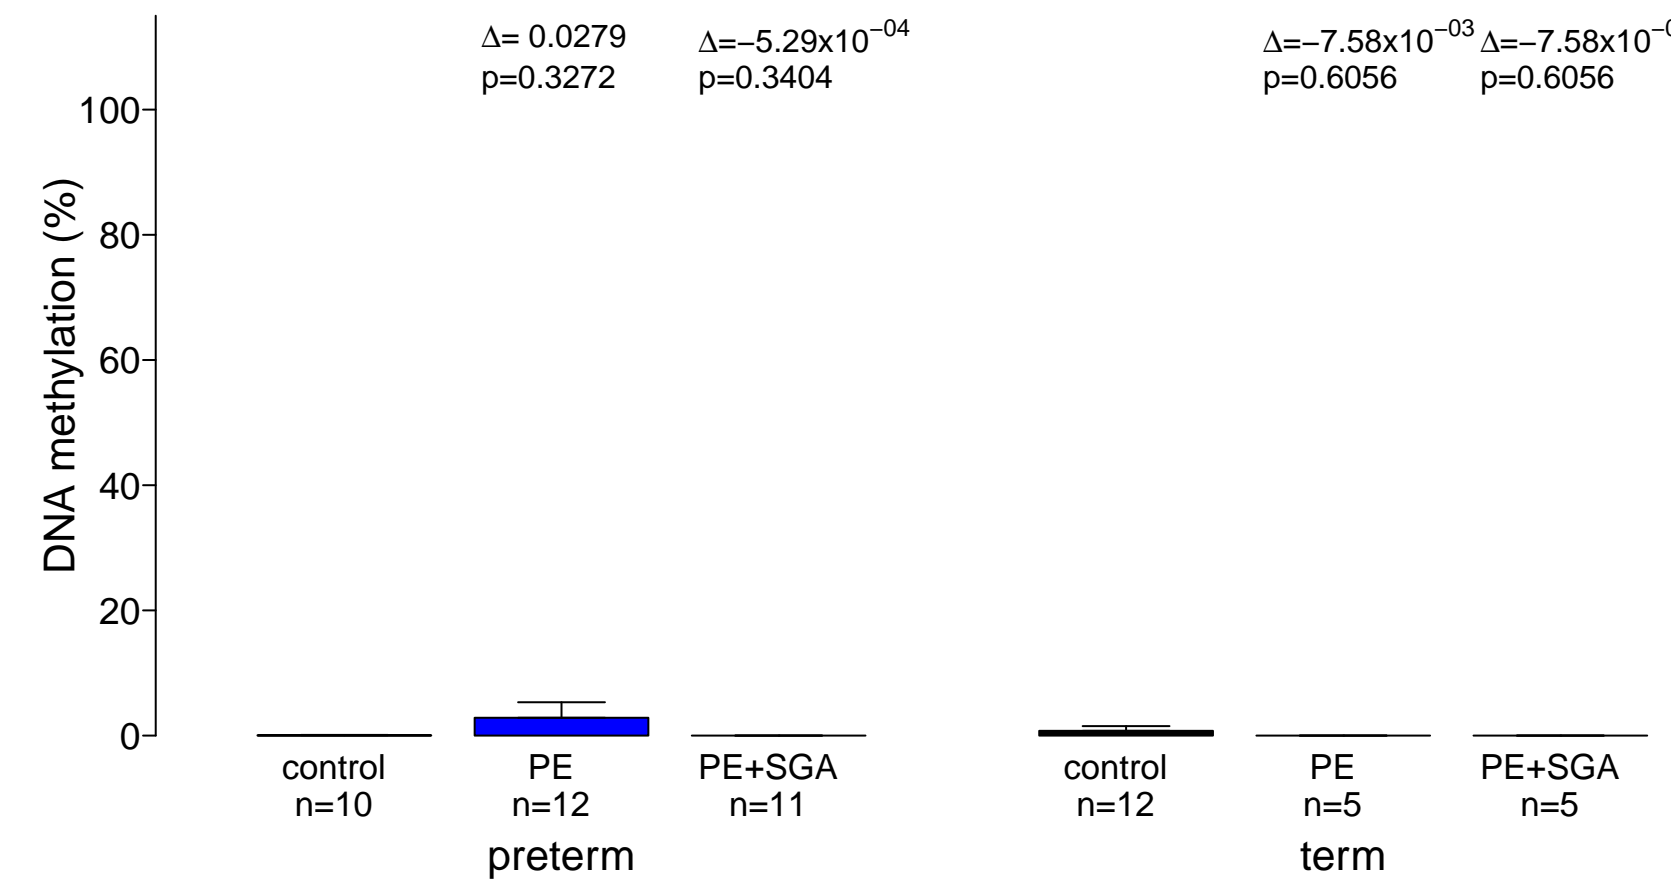

*BCL6* Chr3 187,459,979

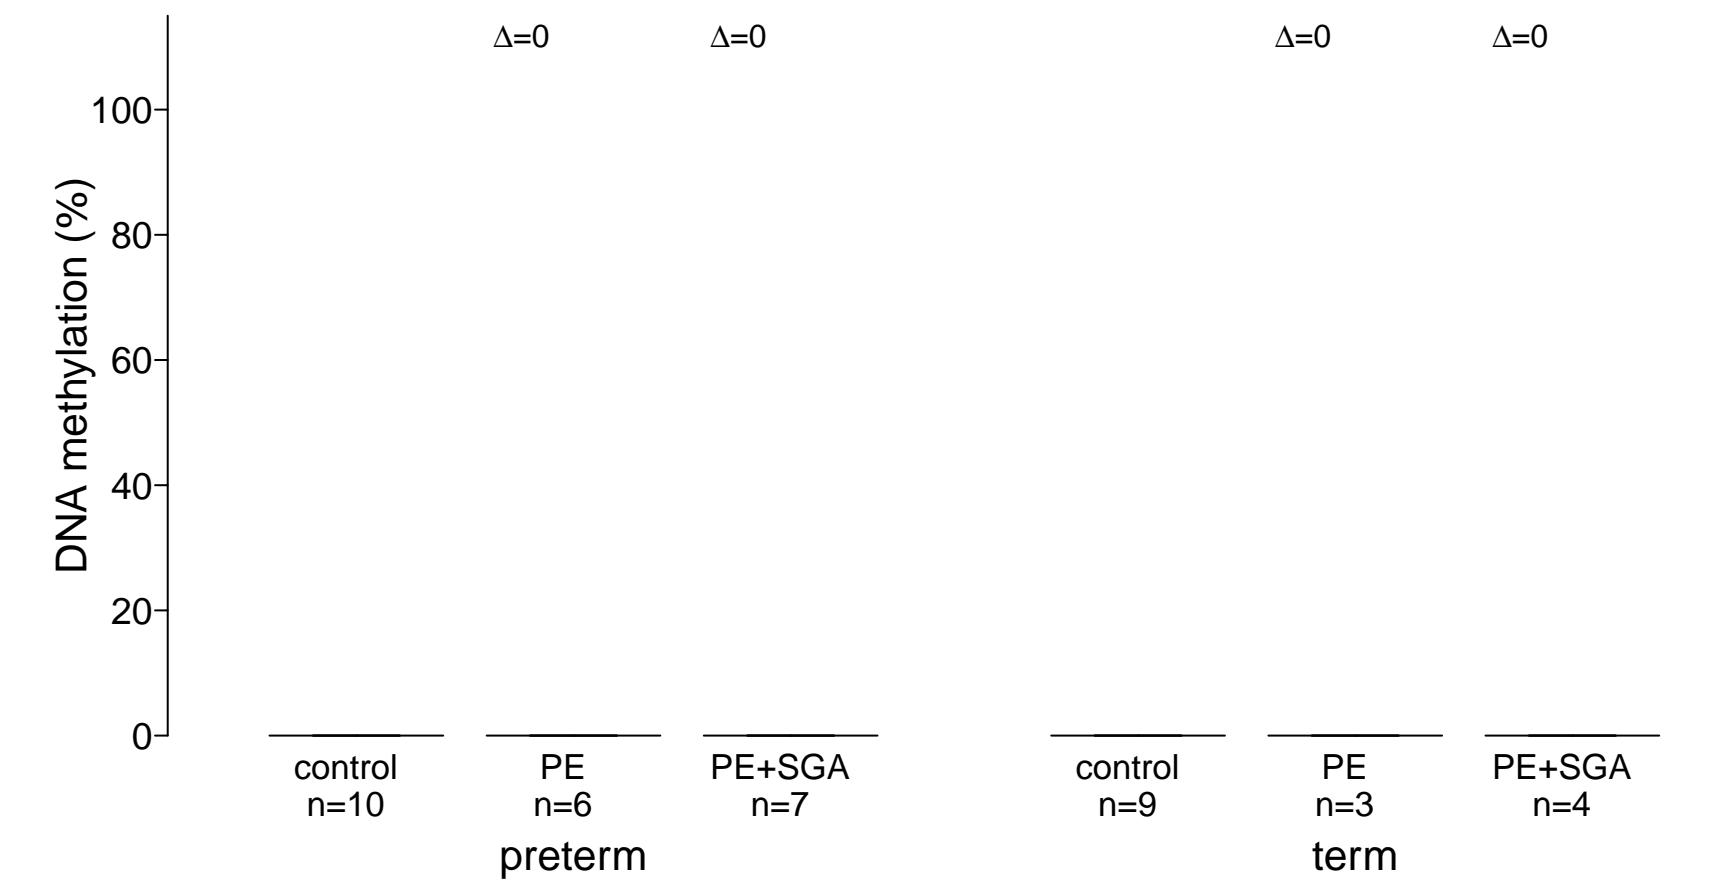

*BCL6* Chr3 187,459,989

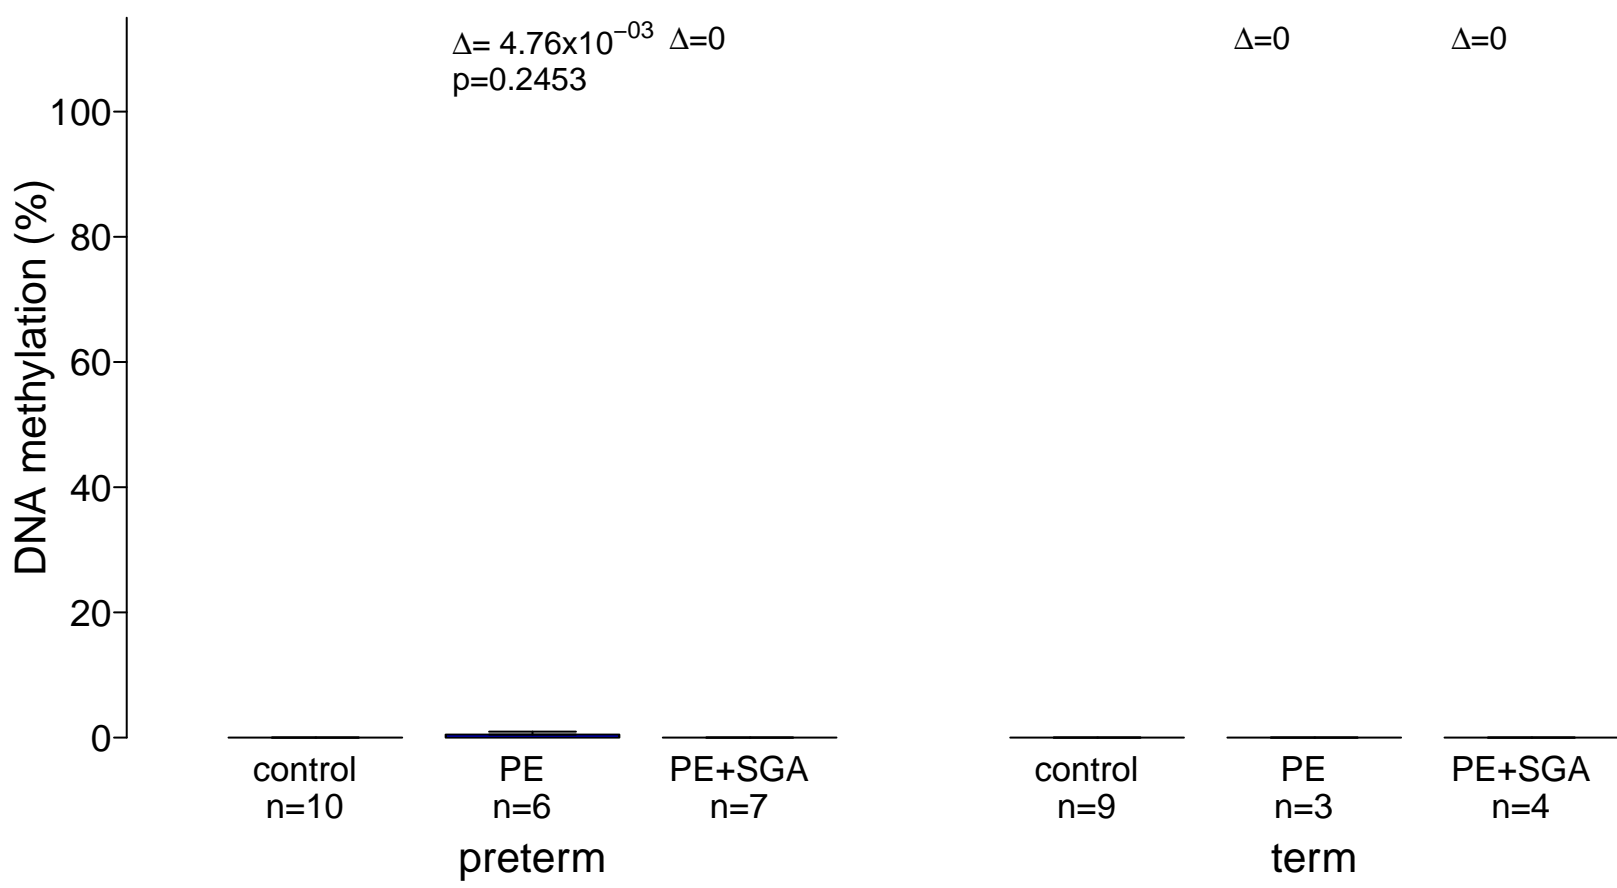

*BCL6* Chr3 187,460,000

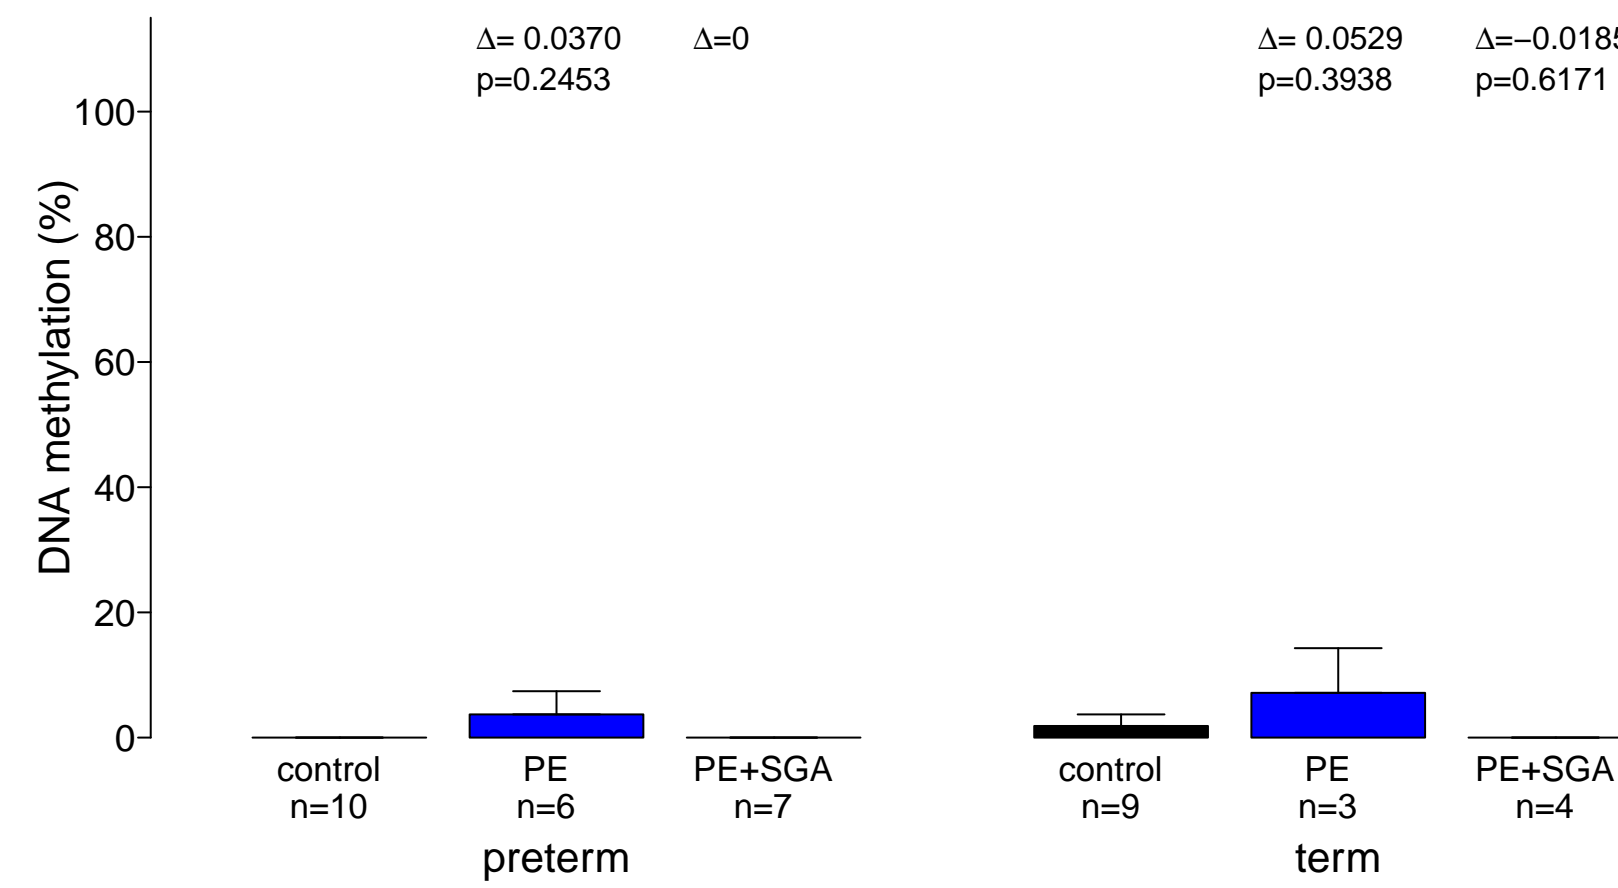

*BCL6* Chr3 187,460,098

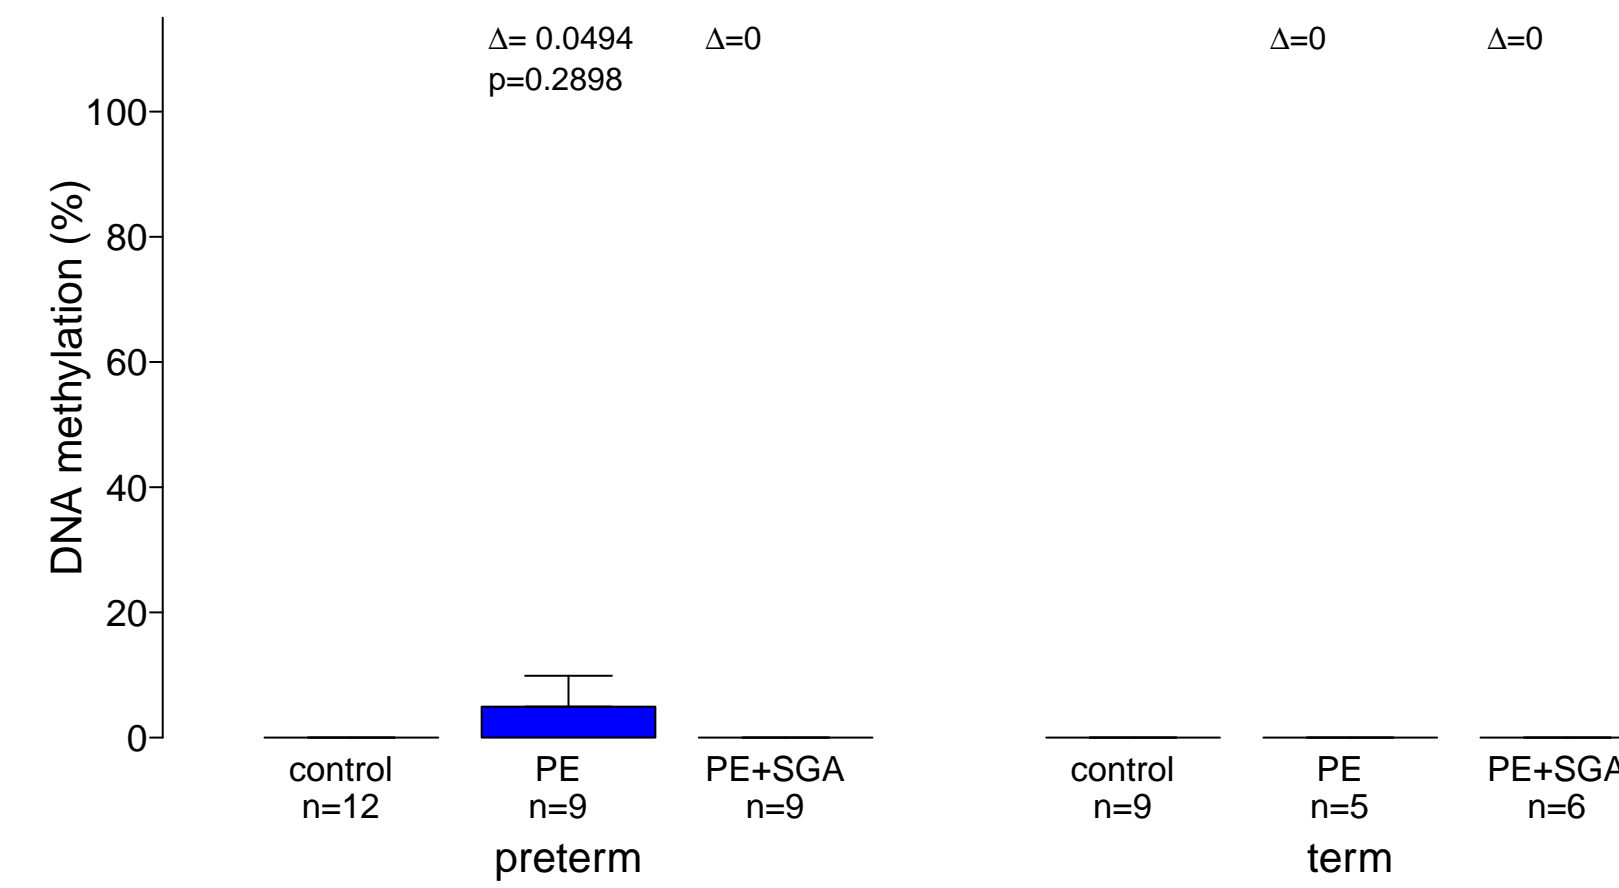

*BCL6* Chr3 187,460,151

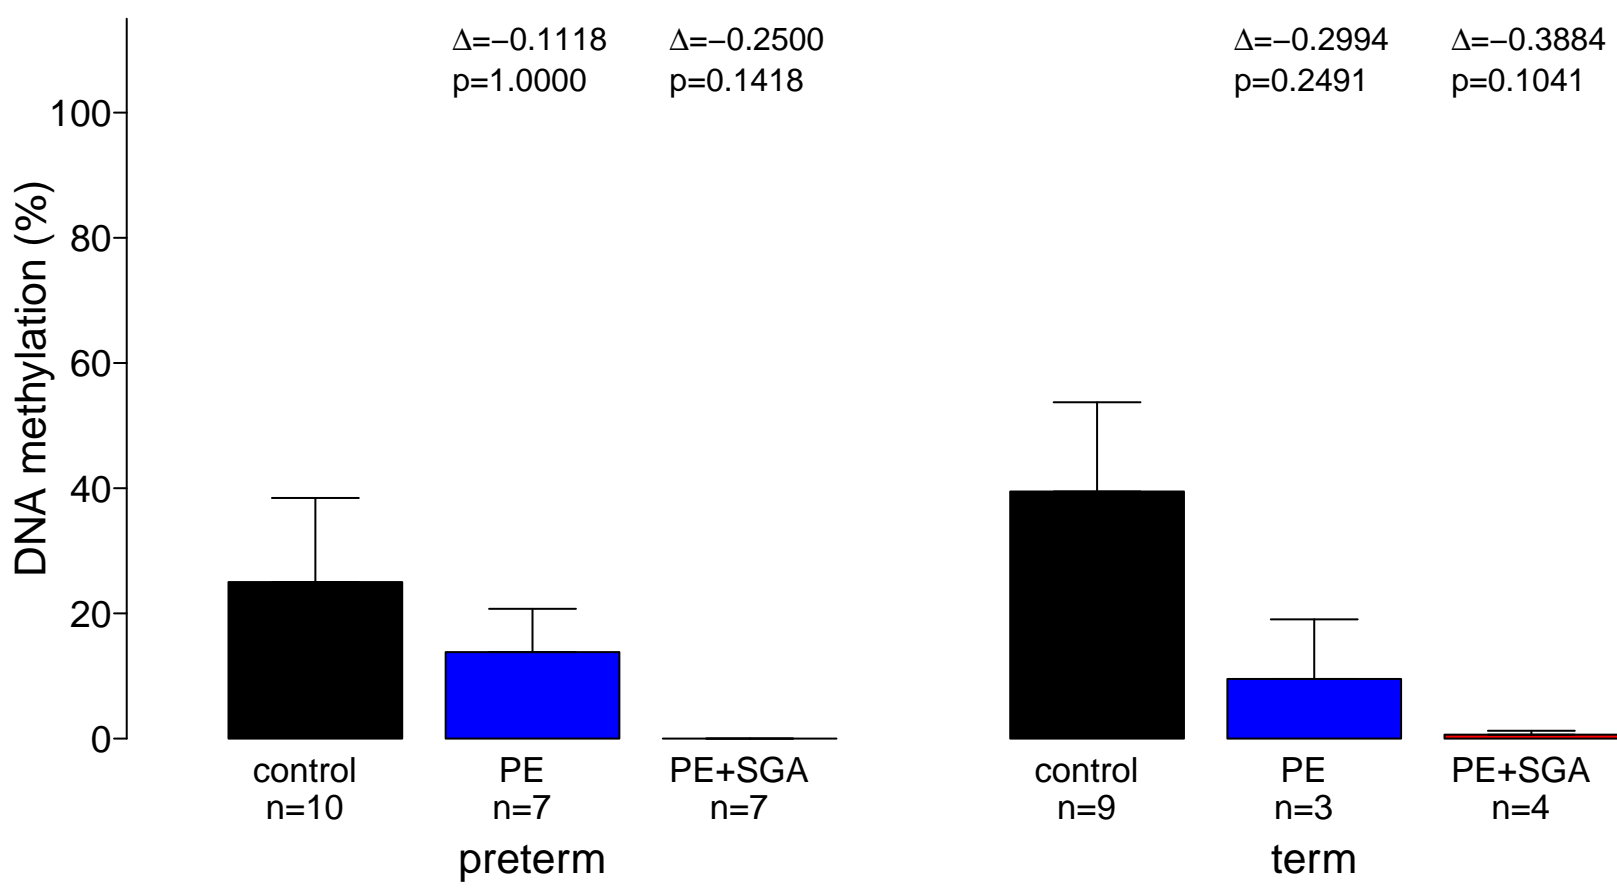

*BCL6* Chr3 187,460,304

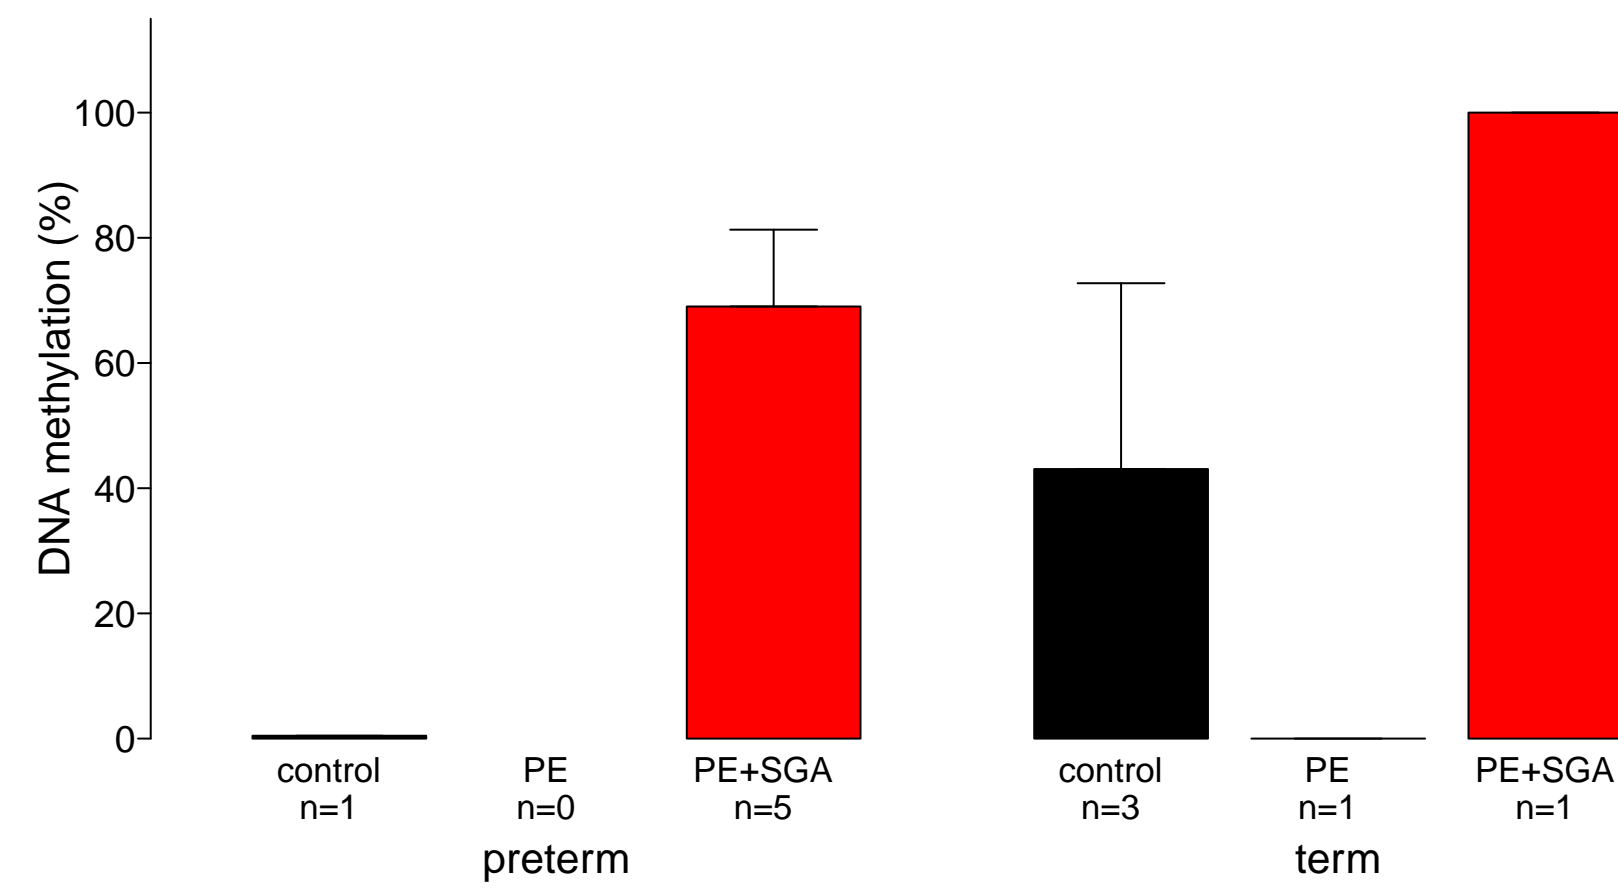

*BCL6* Chr3 187,460,374

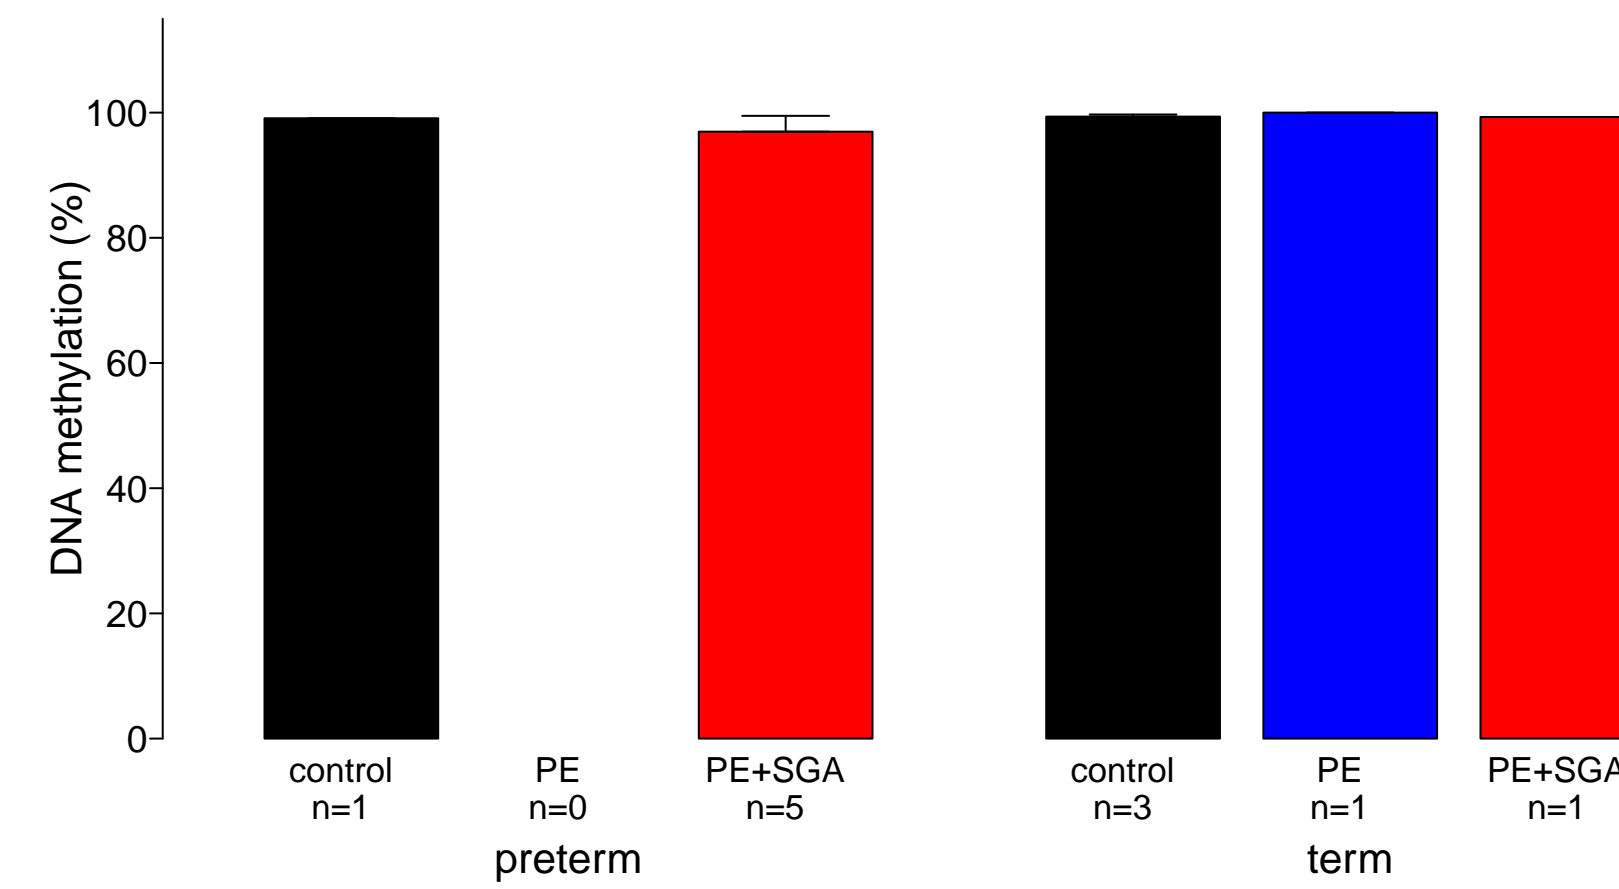

Supplement: Image_10.pdf [file Image_10.pdf]
