# Supplementary material for: Integrated Systems Biology Approach Identifies Novel Maternal and Placental Pathways of Preeclampsia
Source: PubMed Central journal article supplement (PMC6092567; doi:10.3389/fimmu.2018.01661), 2018-08-08

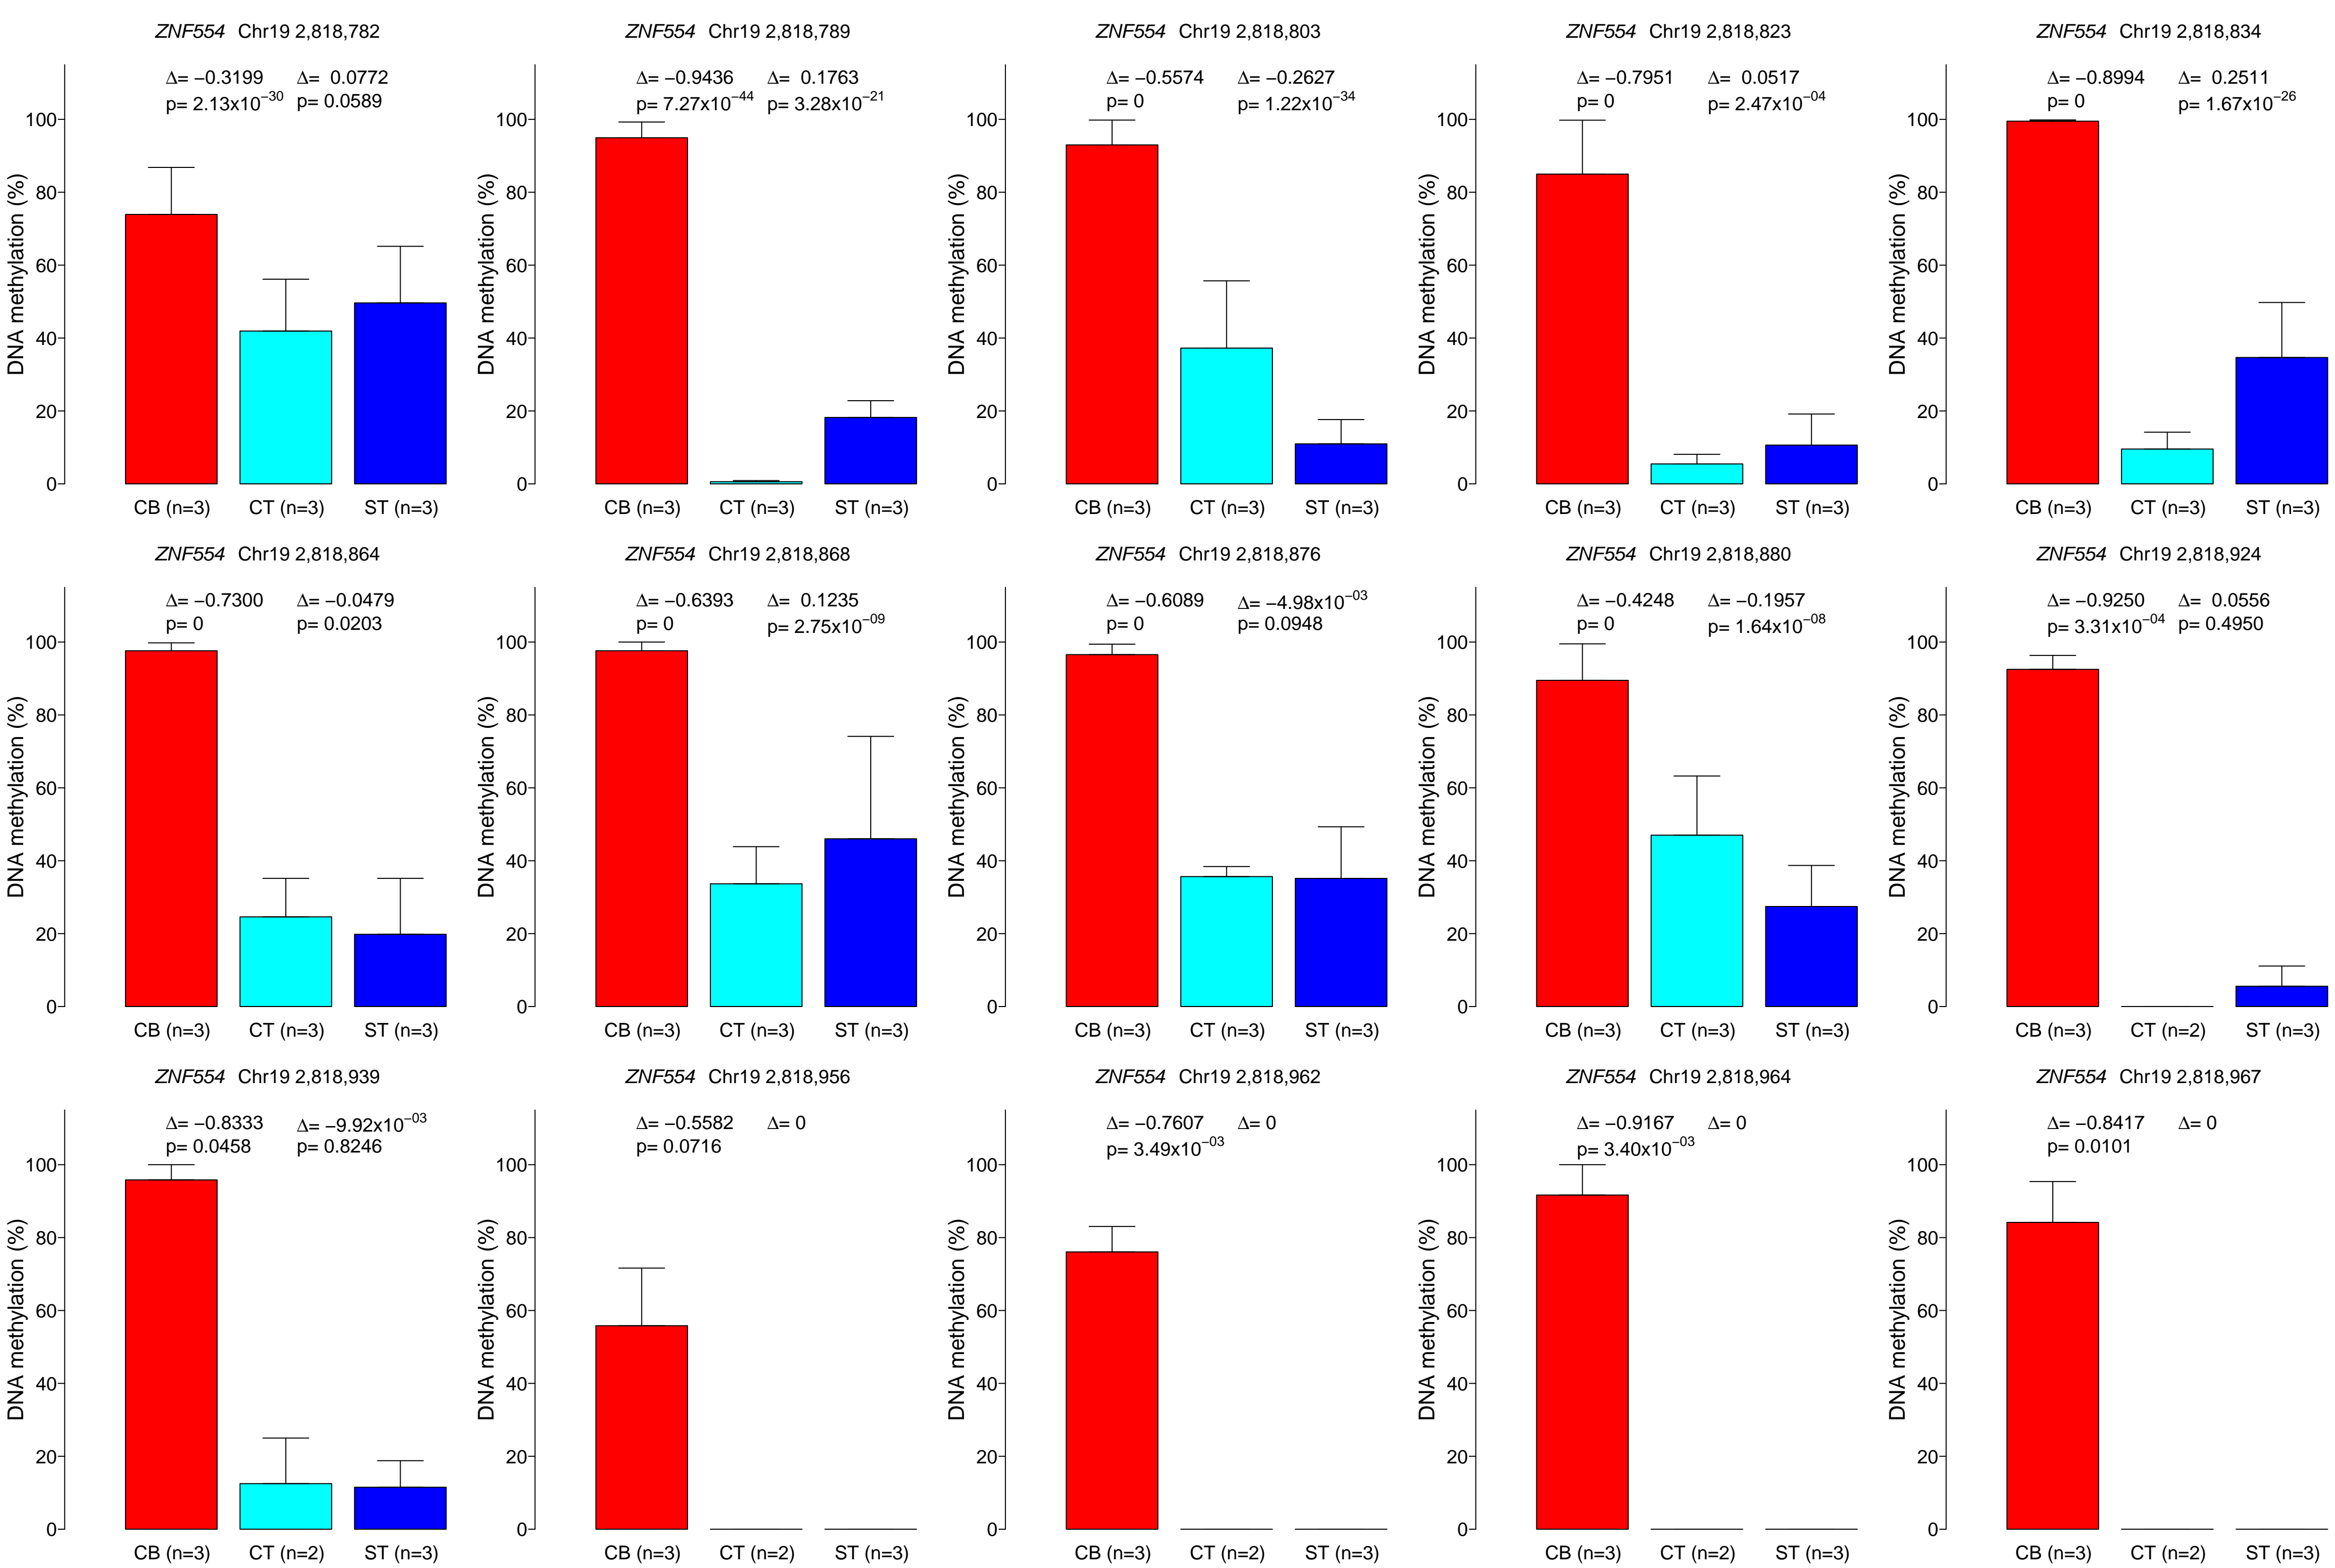

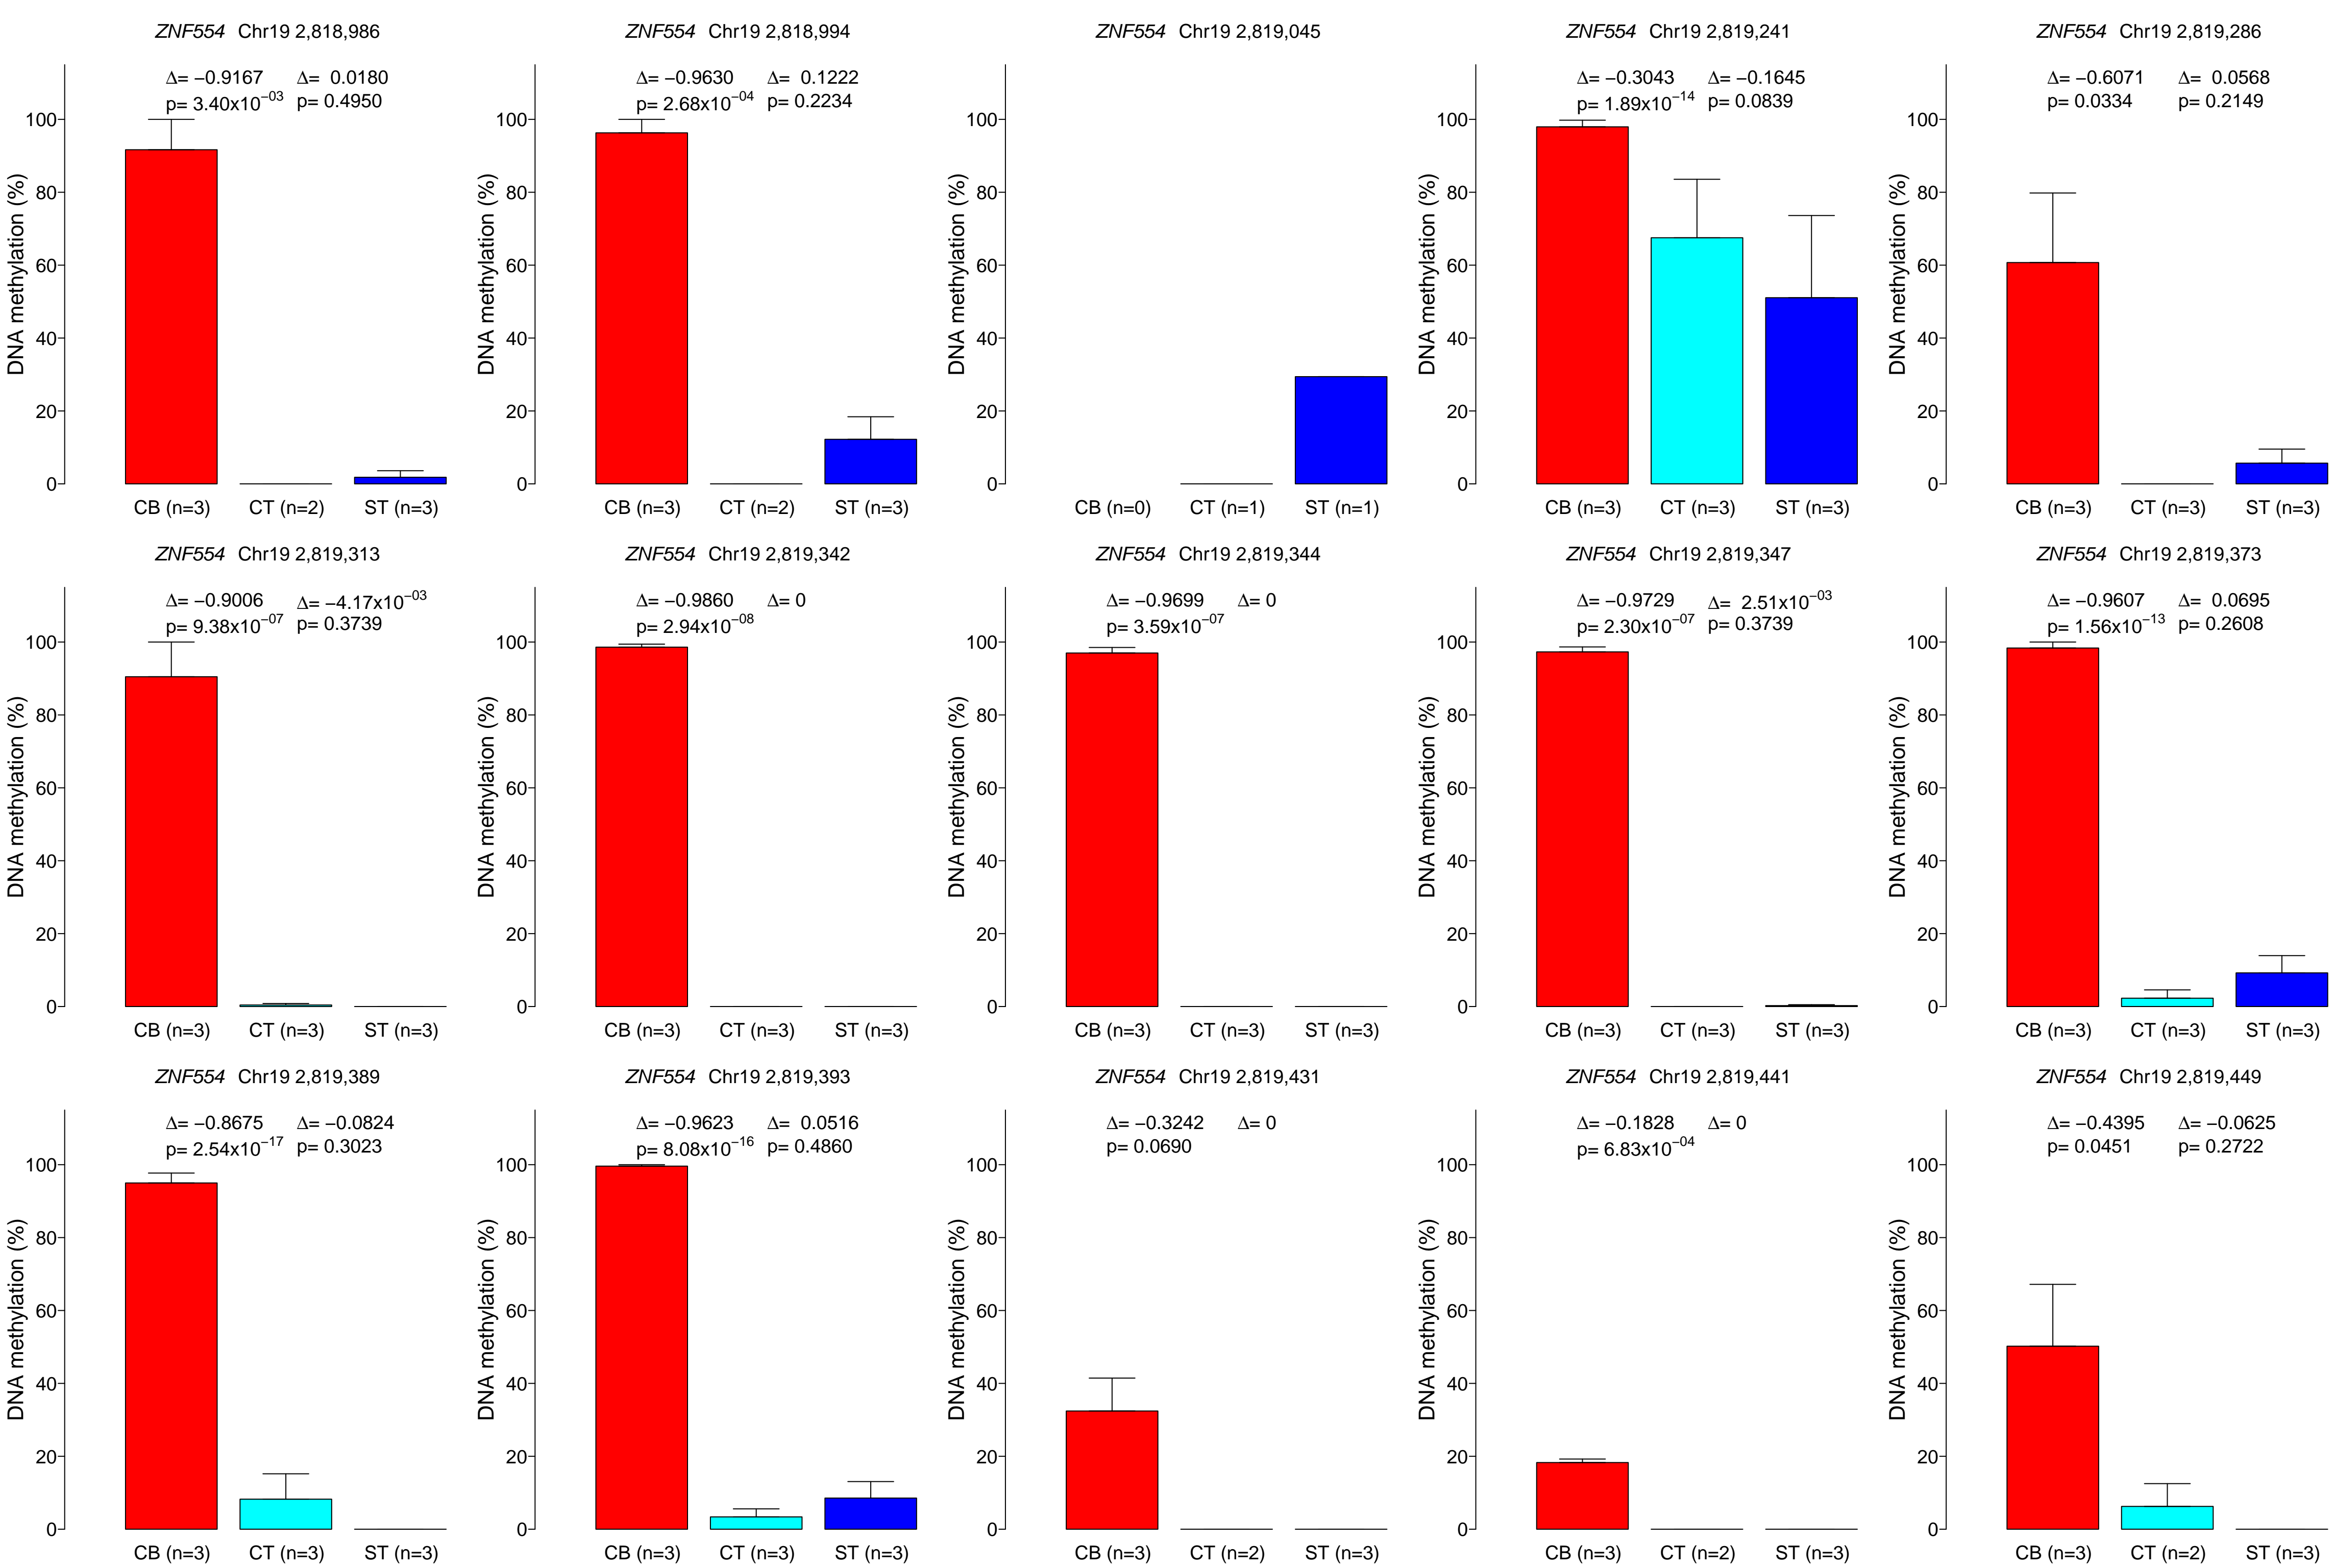

ZNF554 Chr19 2,819,496

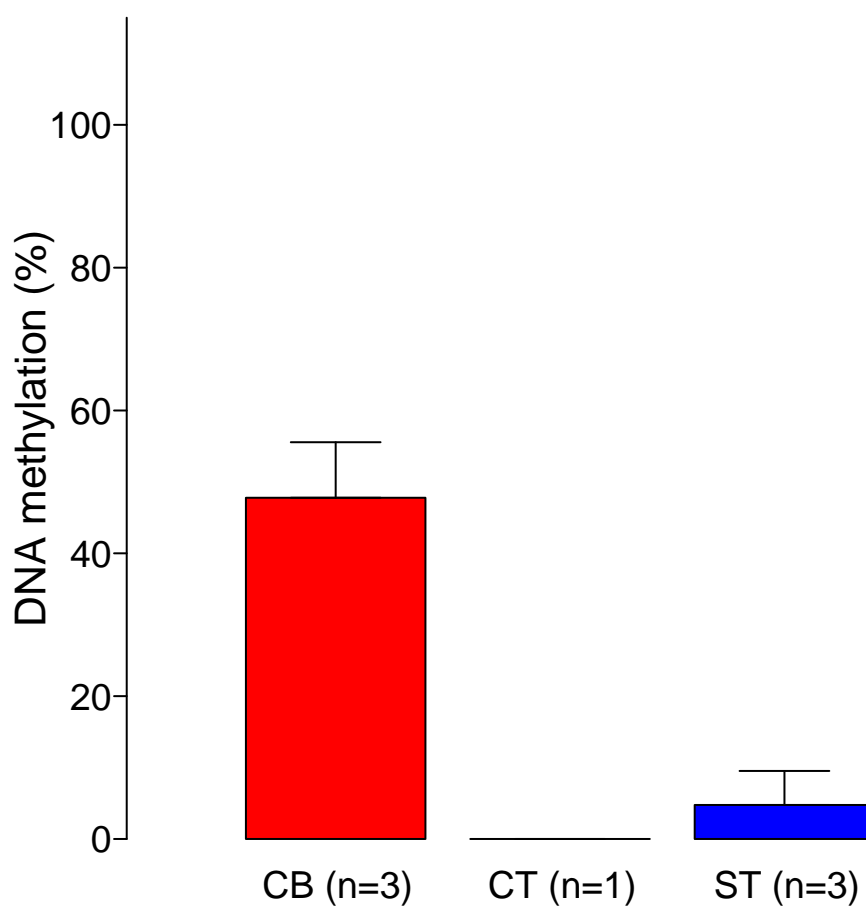

ZNF554 Chr19 2,819,505

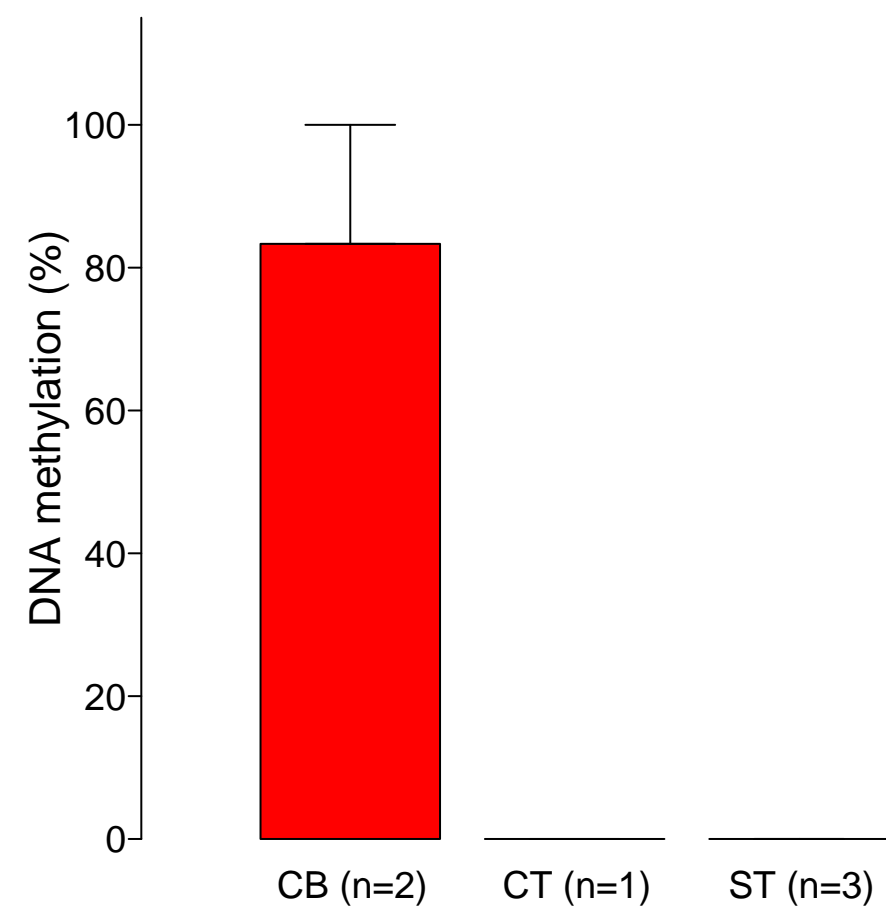

ZNF554 Chr19 2,819,575

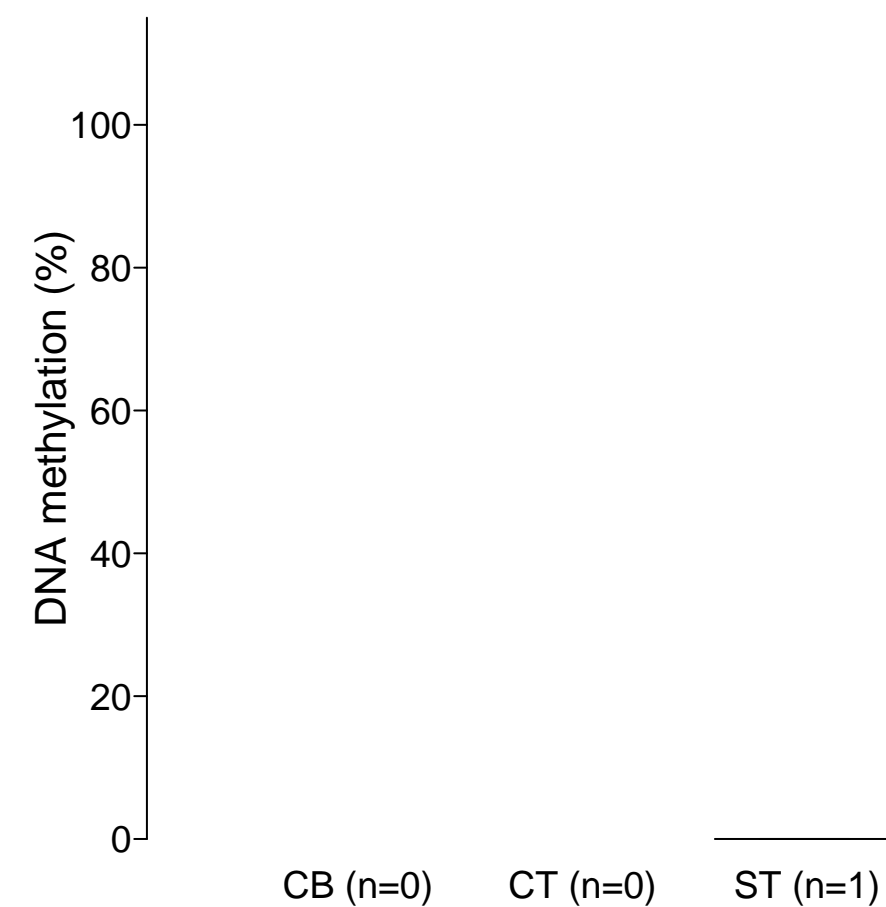

ZNF554 Chr19 2,819,630

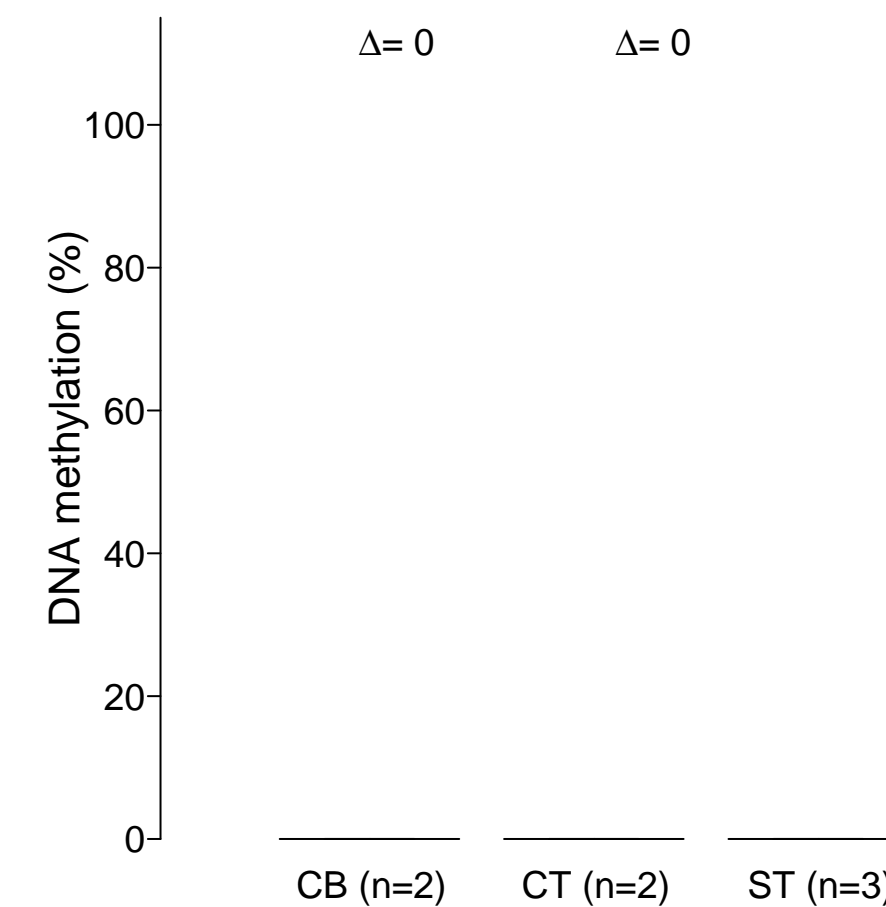

ZNF554 Chr19 2,819,633

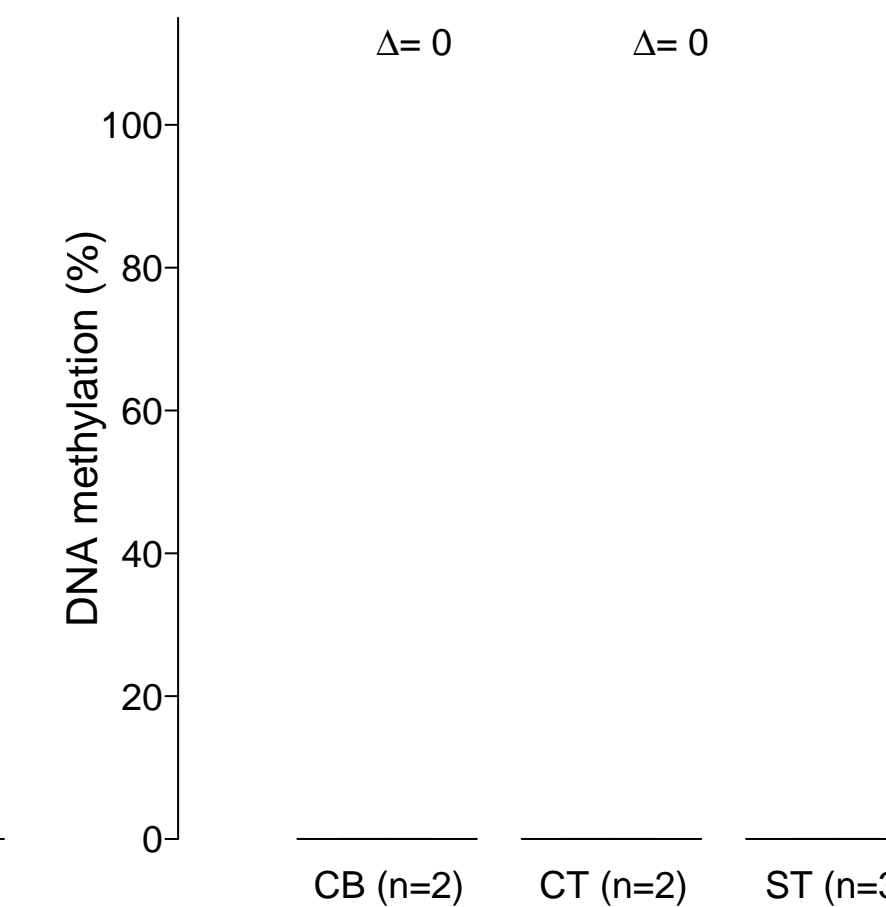

ZNF554 Chr19 2,819,640

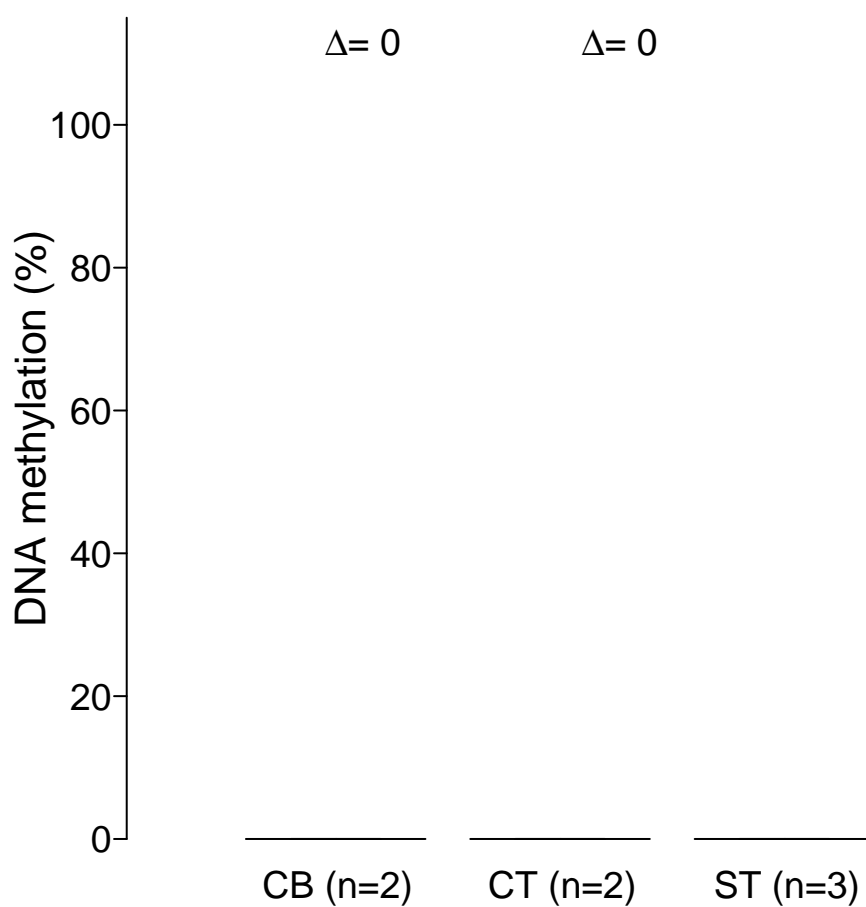

ZNF554 Chr19 2,819,643

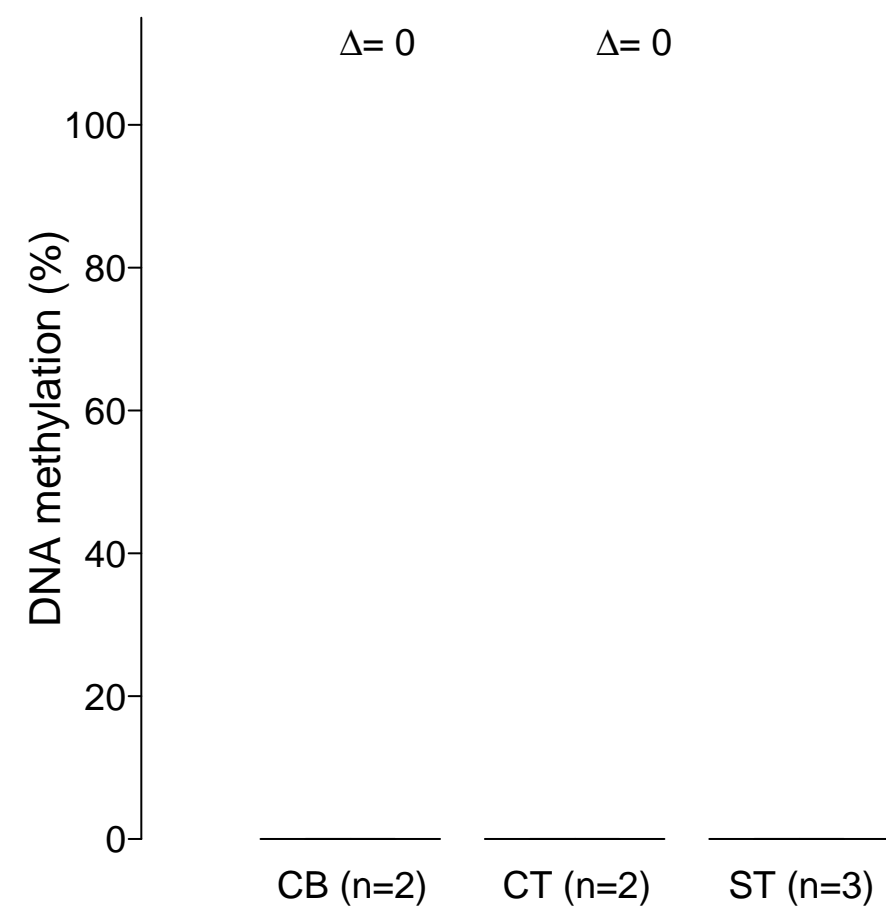

ZNF554 Chr19 2,819,669

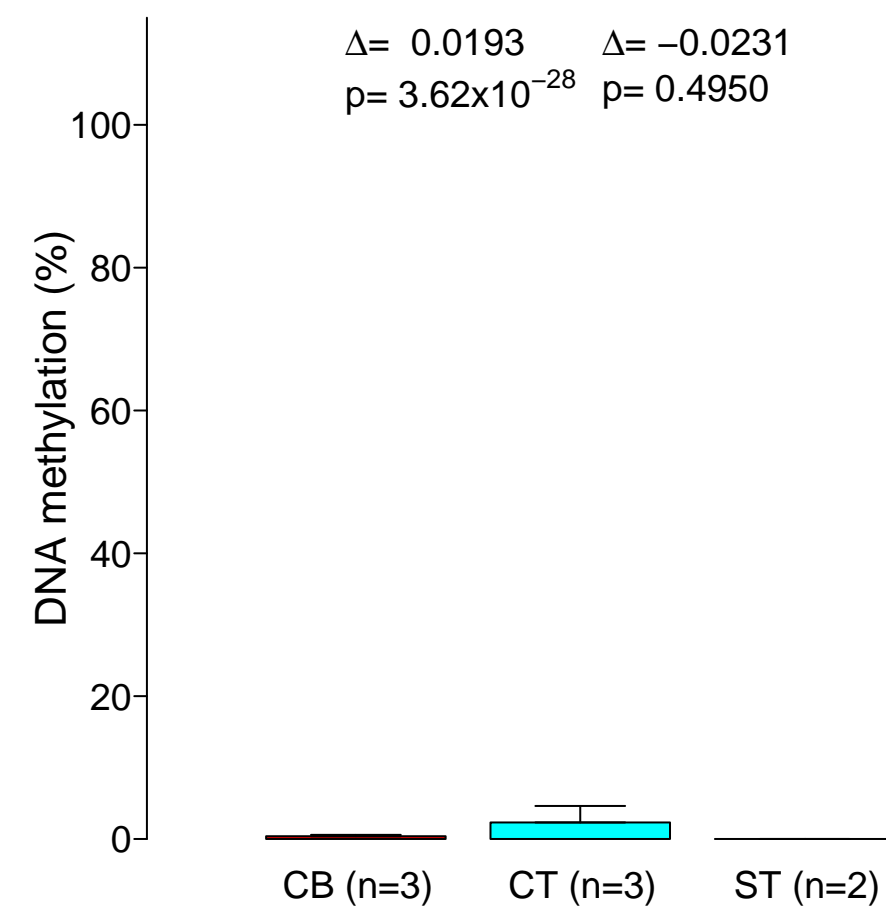

ZNF554 Chr19 2,819,671

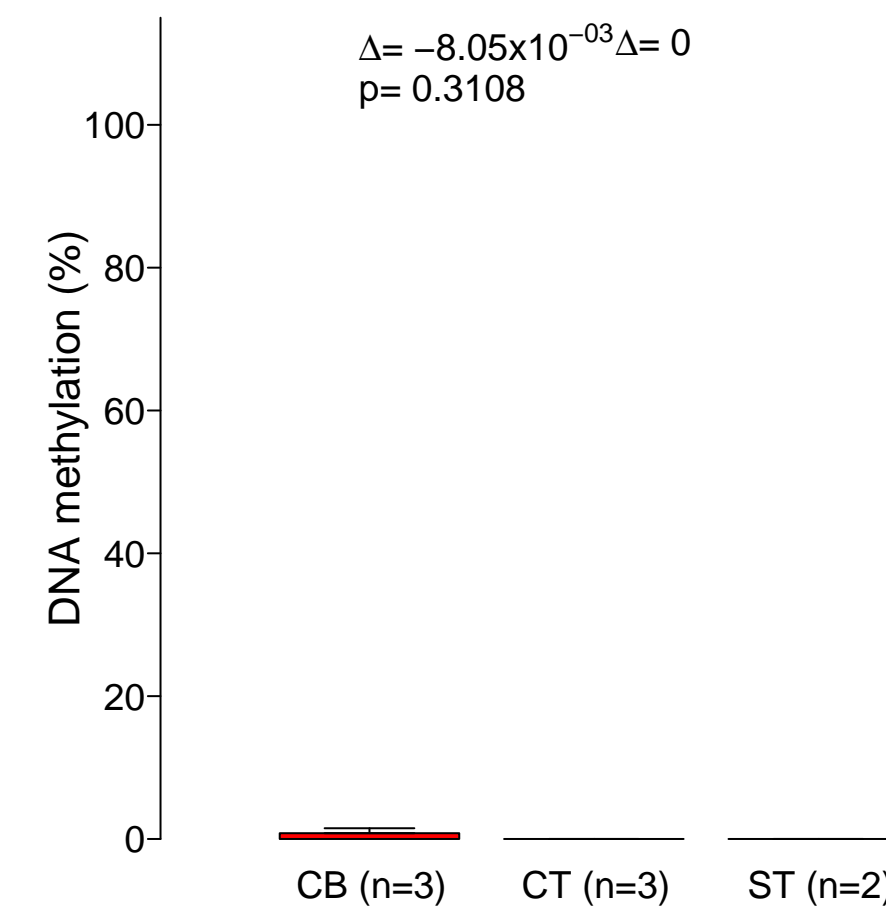

ZNF554 Chr19 2,819,687

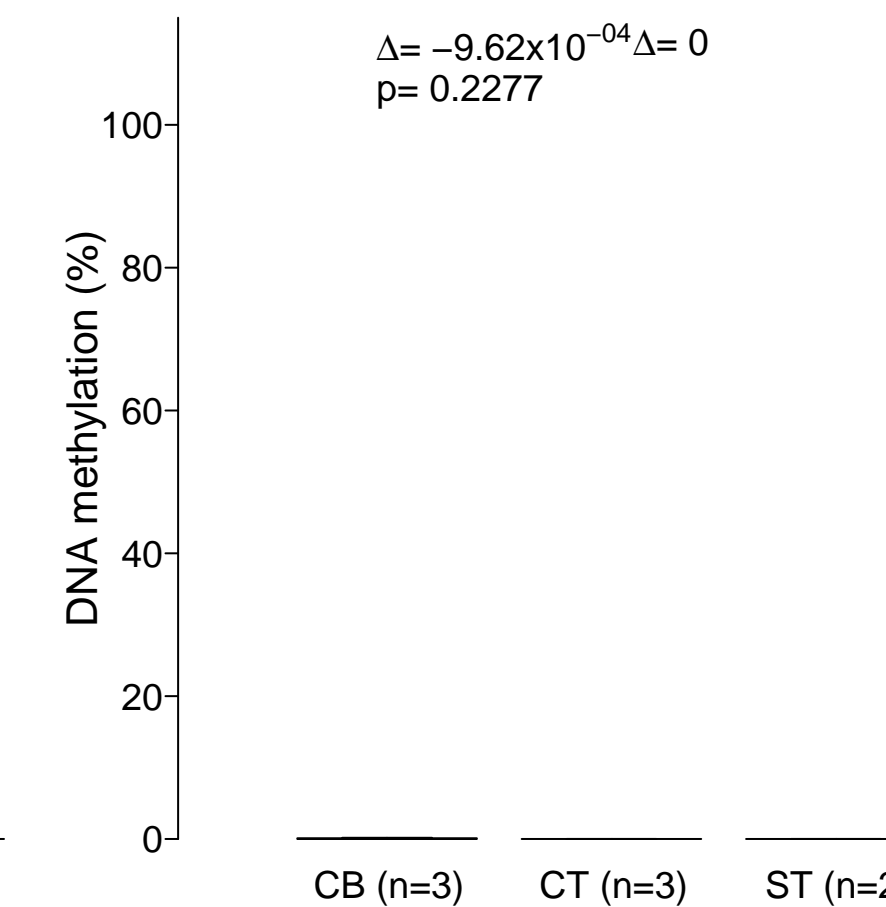

ZNF554 Chr19 2,819,699

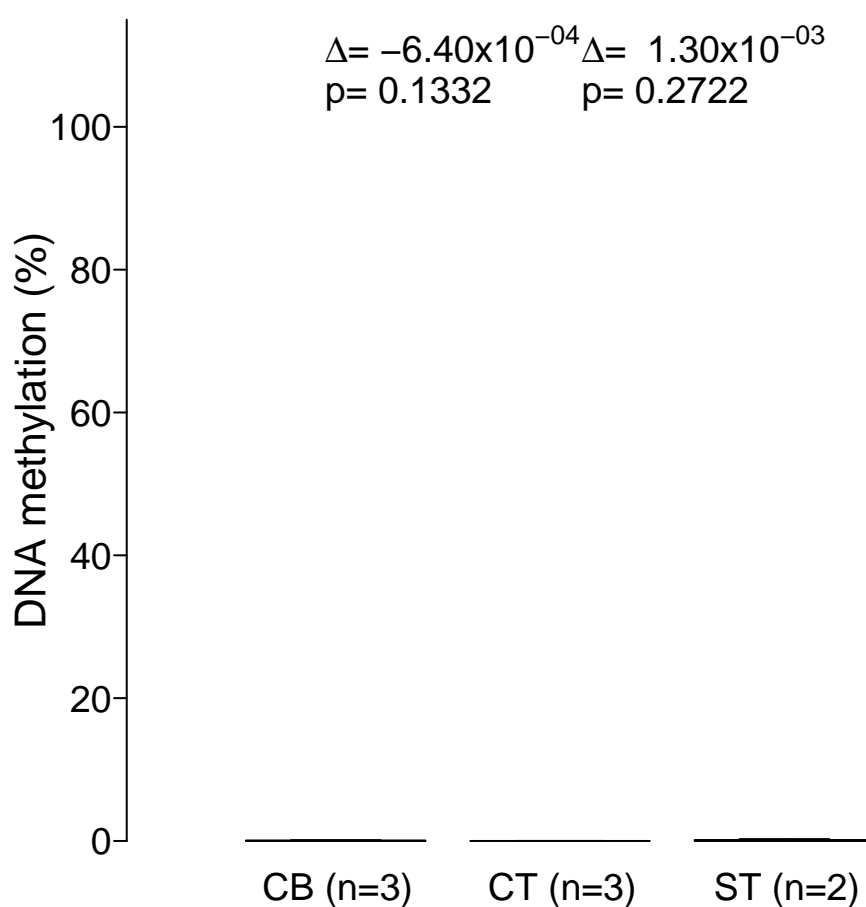

ZNF554 Chr19 2,819,708

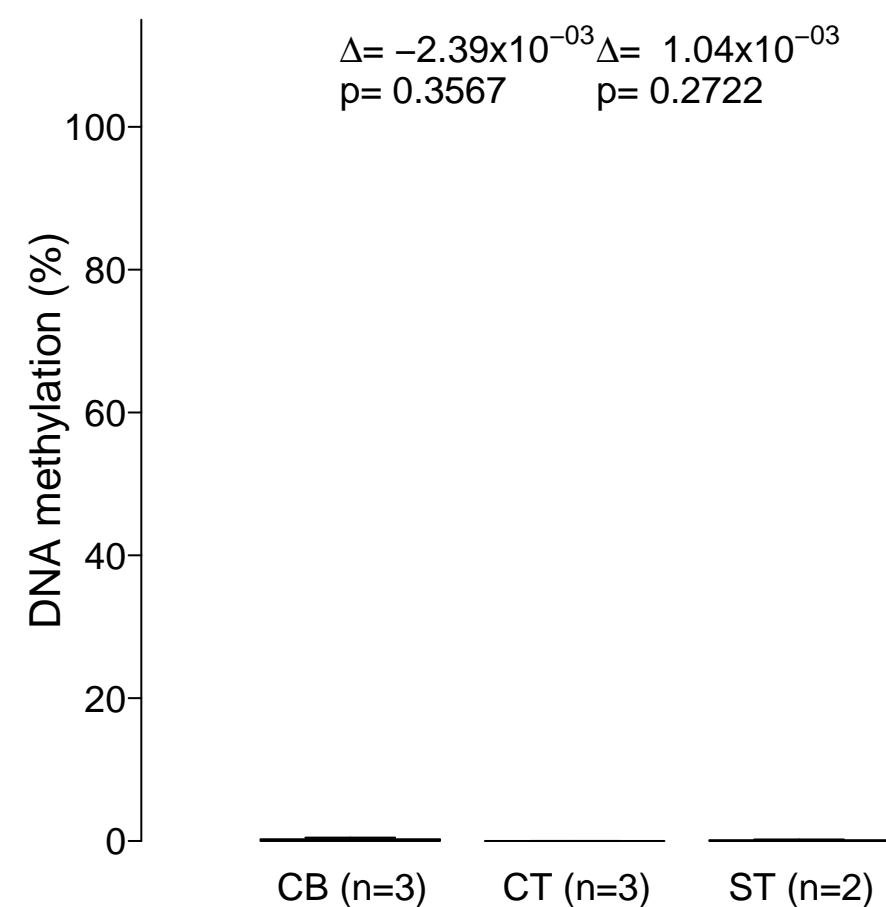

ZNF554 Chr19 2,819,726

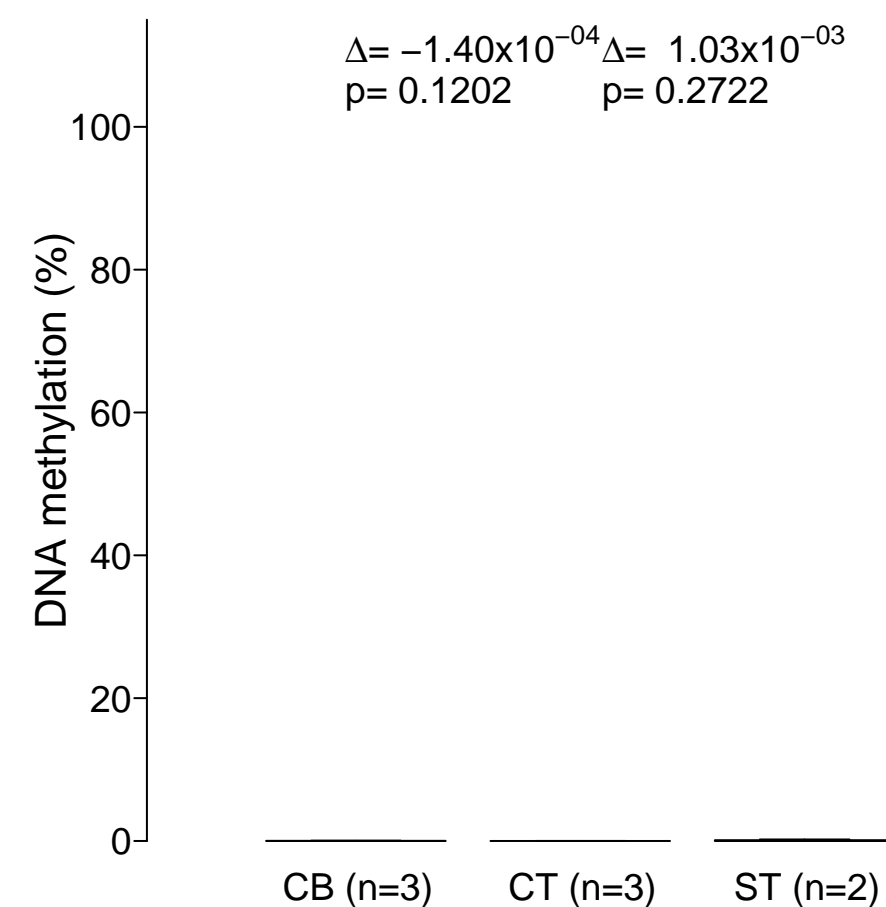

ZNF554 Chr19 2,819,737

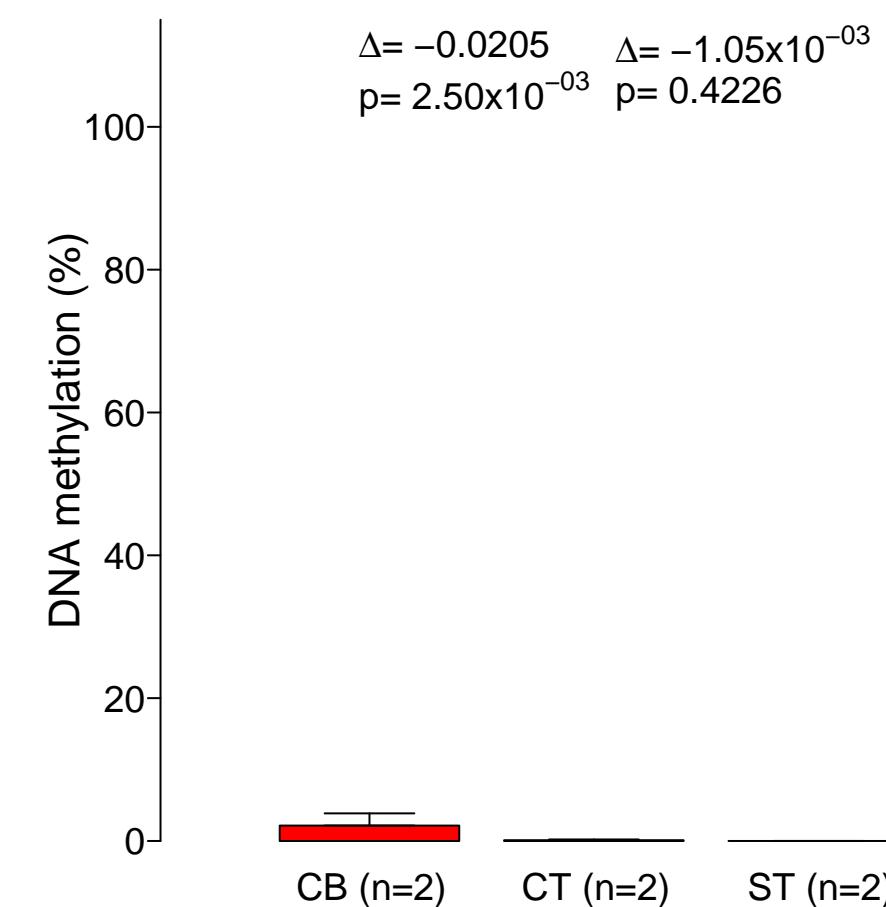

ZNF554 Chr19 2,819,747

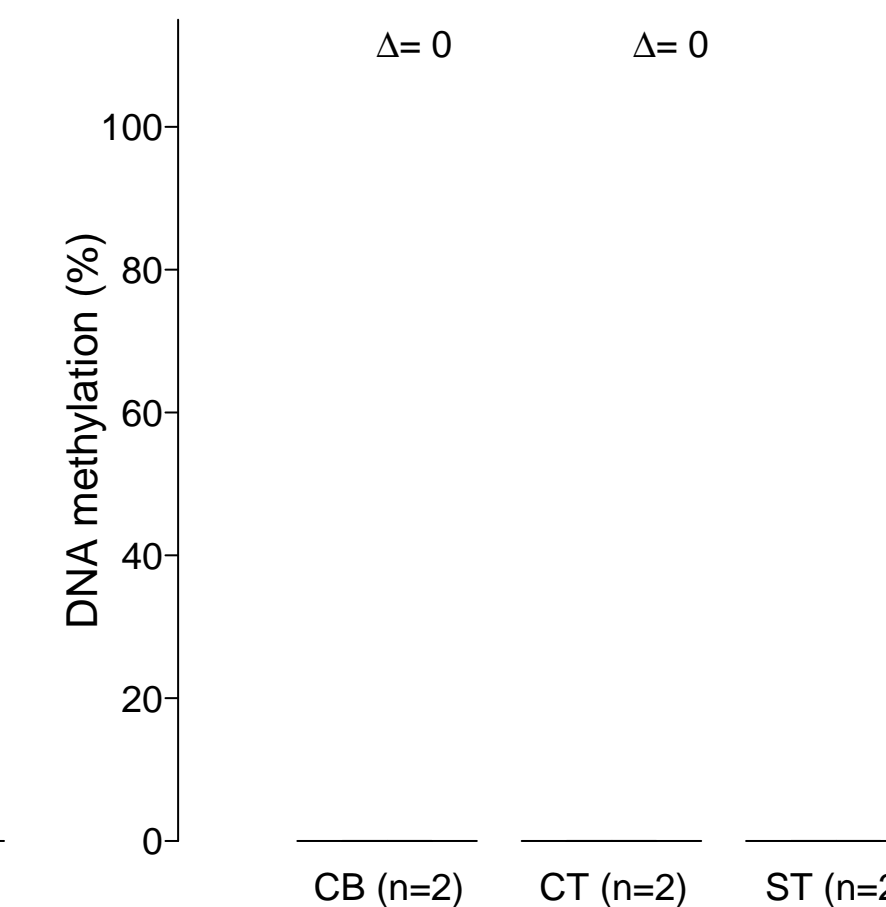

ZNF554 Chr19 2,819,753

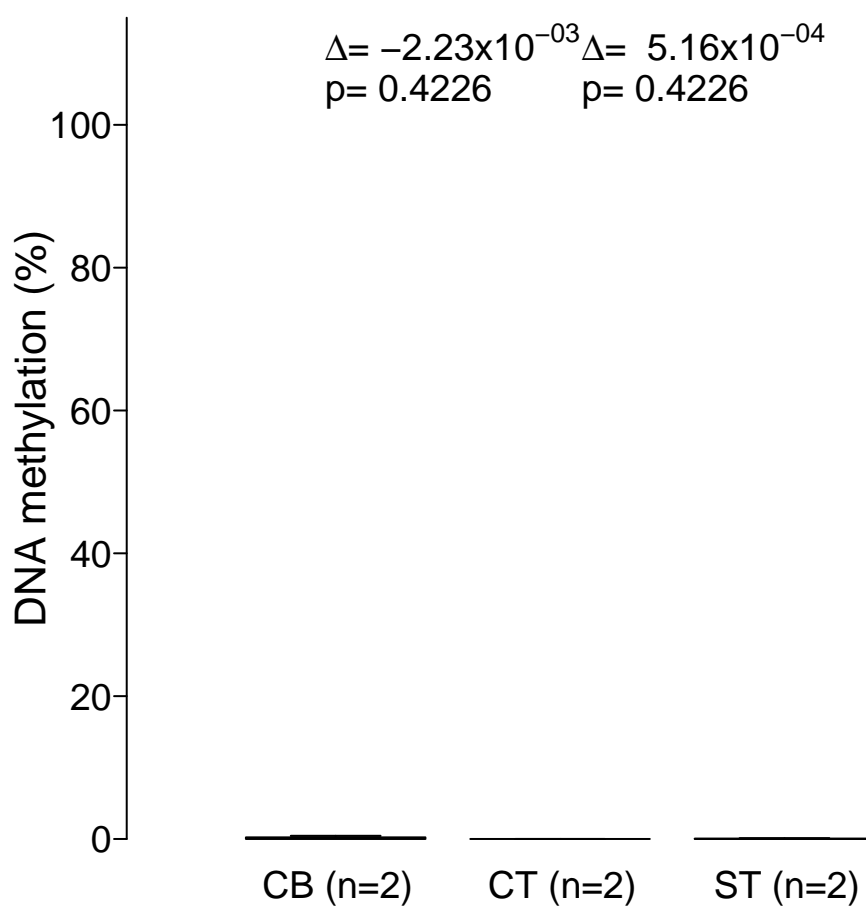

ZNF554 Chr19 2,819,756

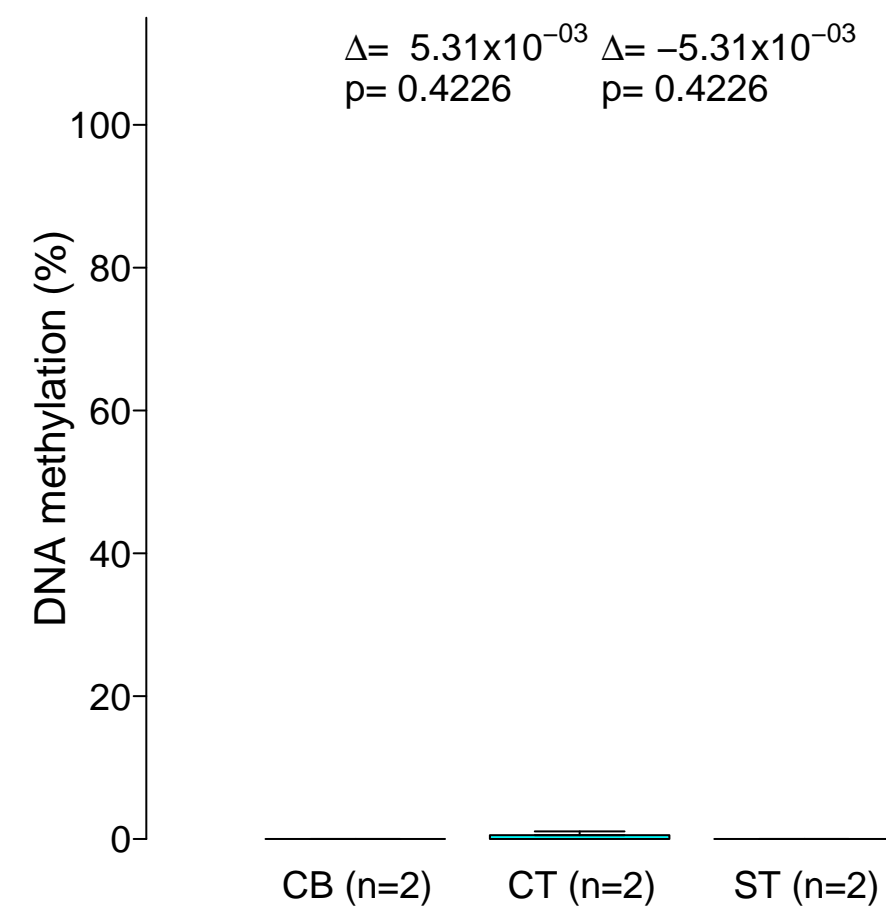

ZNF554 Chr19 2,819,760

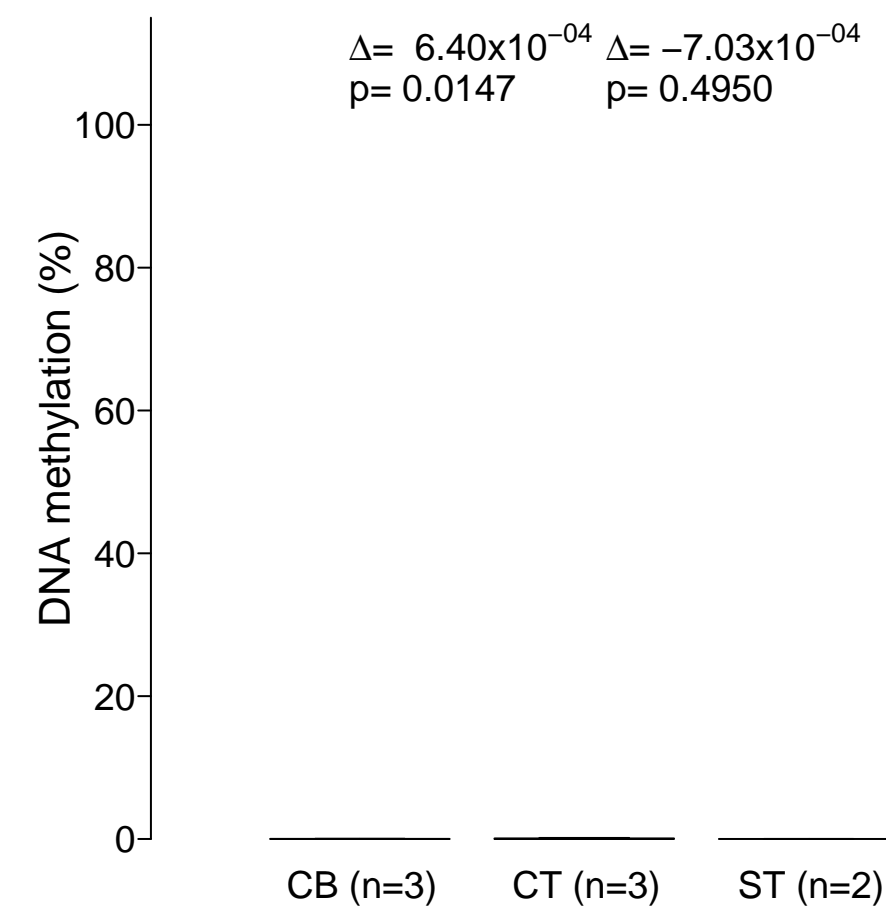

ZNF554 Chr19 2,819,764

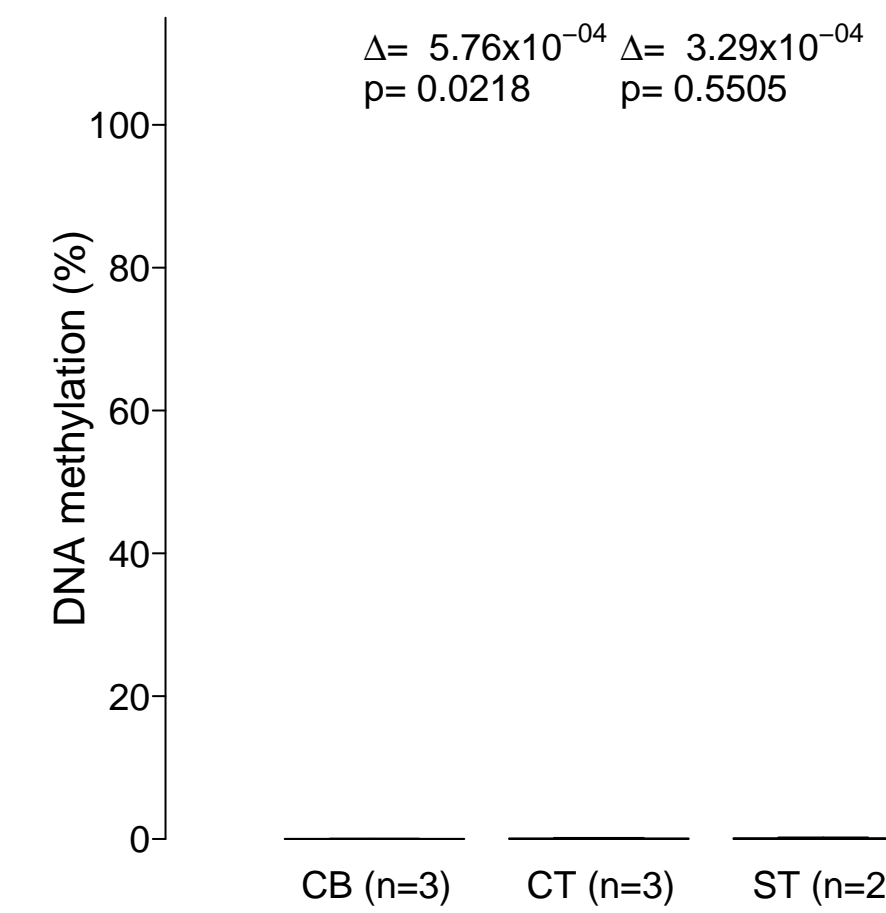

ZNF554 Chr19 2,819,770

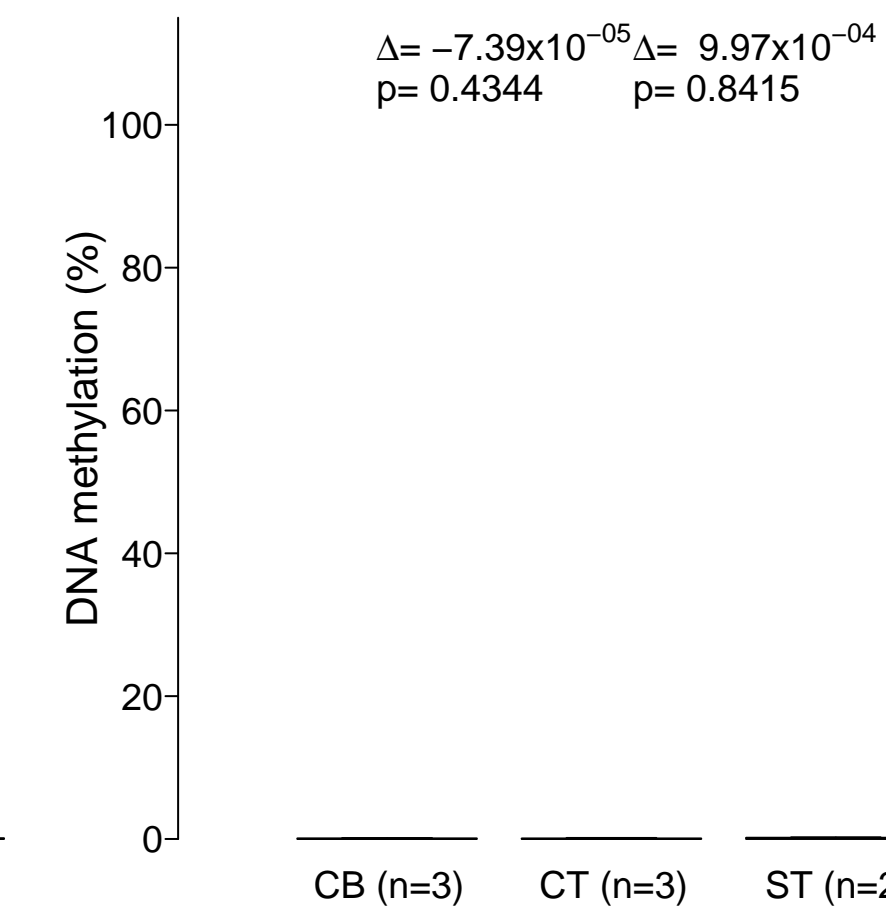

ZNF554 Chr19 2,819,773

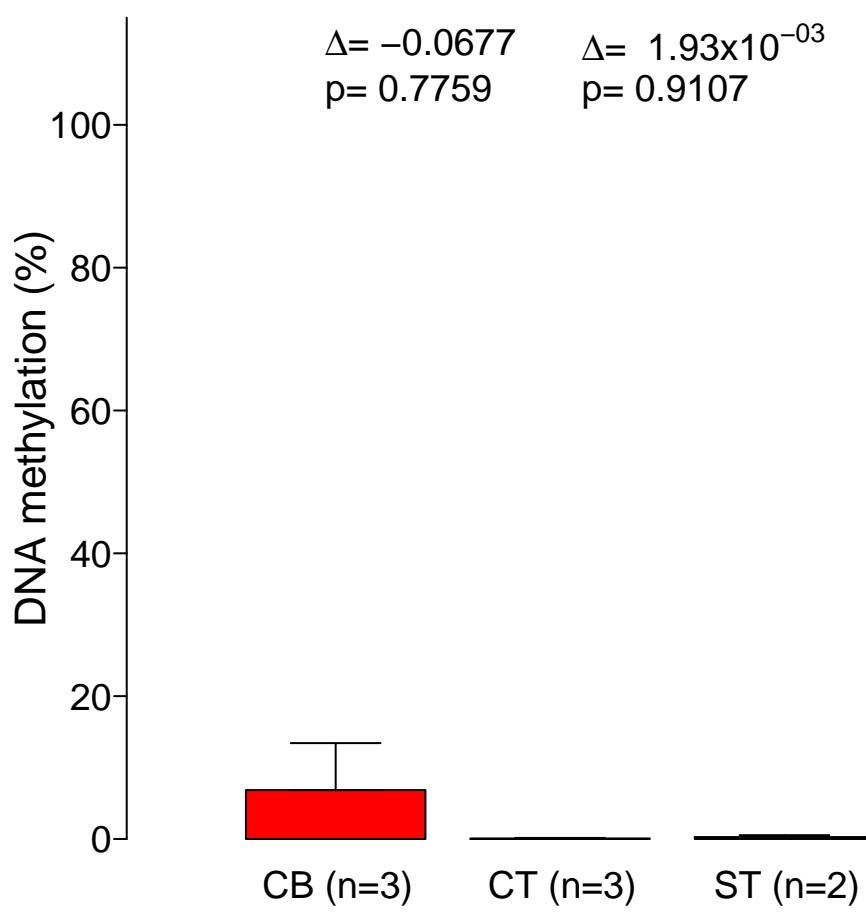

ZNF554 Chr19 2,819,807

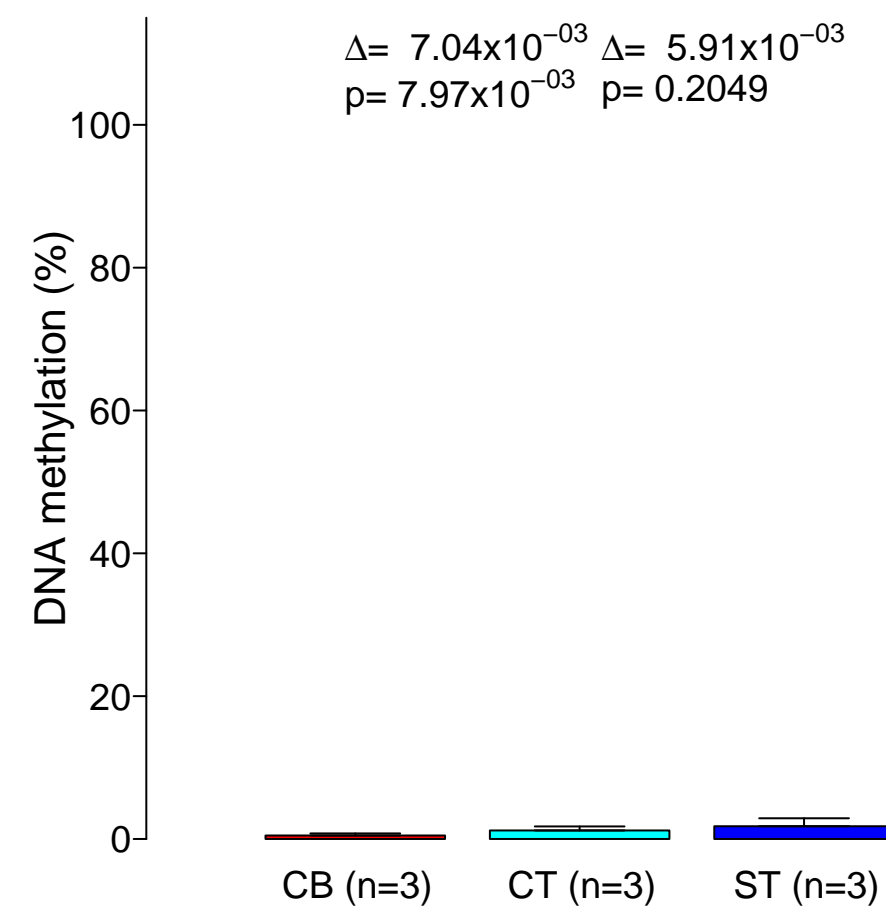

ZNF554 Chr19 2,819,810

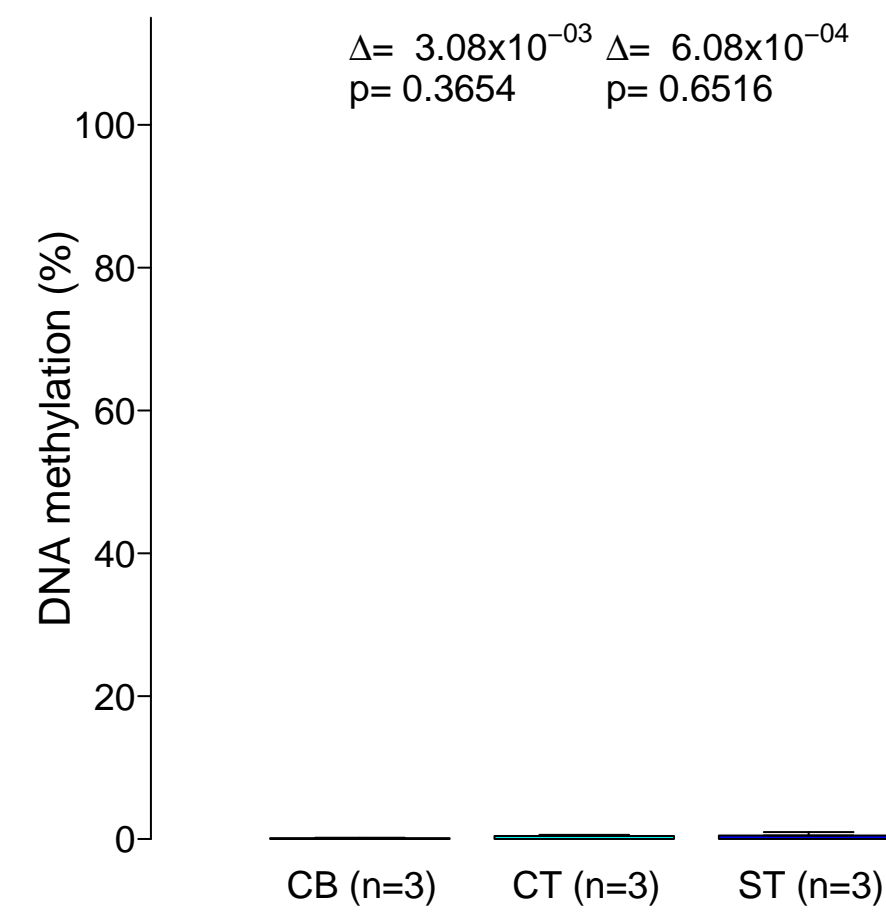

ZNF554 Chr19 2,819,812

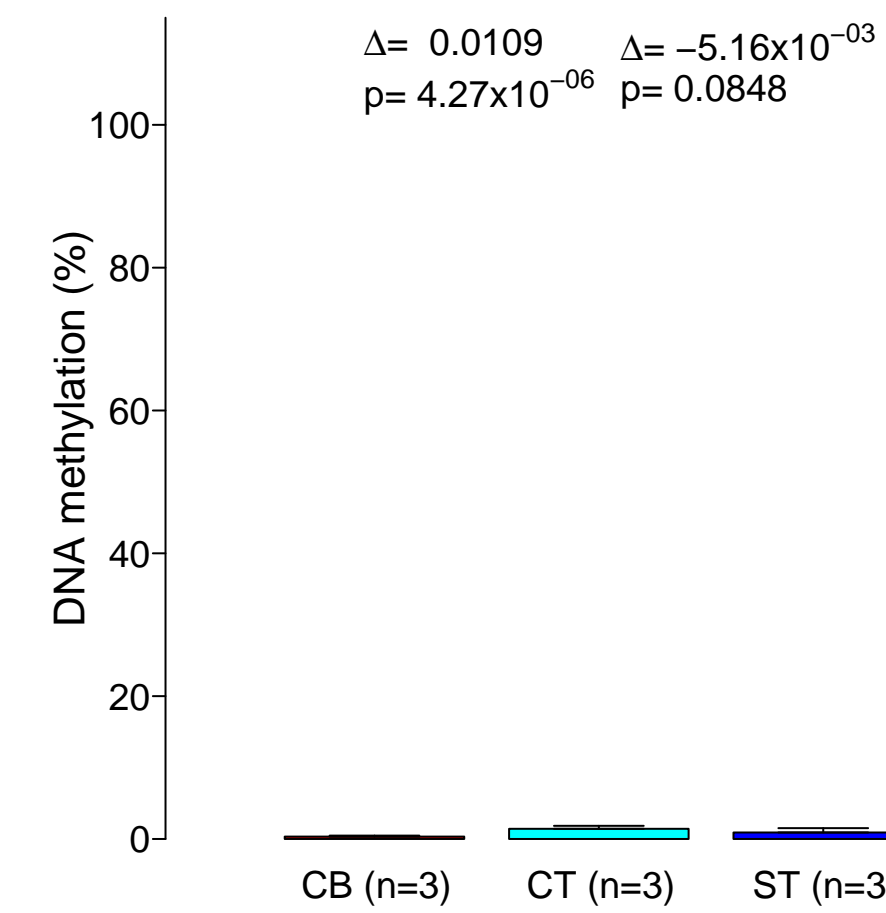

ZNF554 Chr19 2,819,817

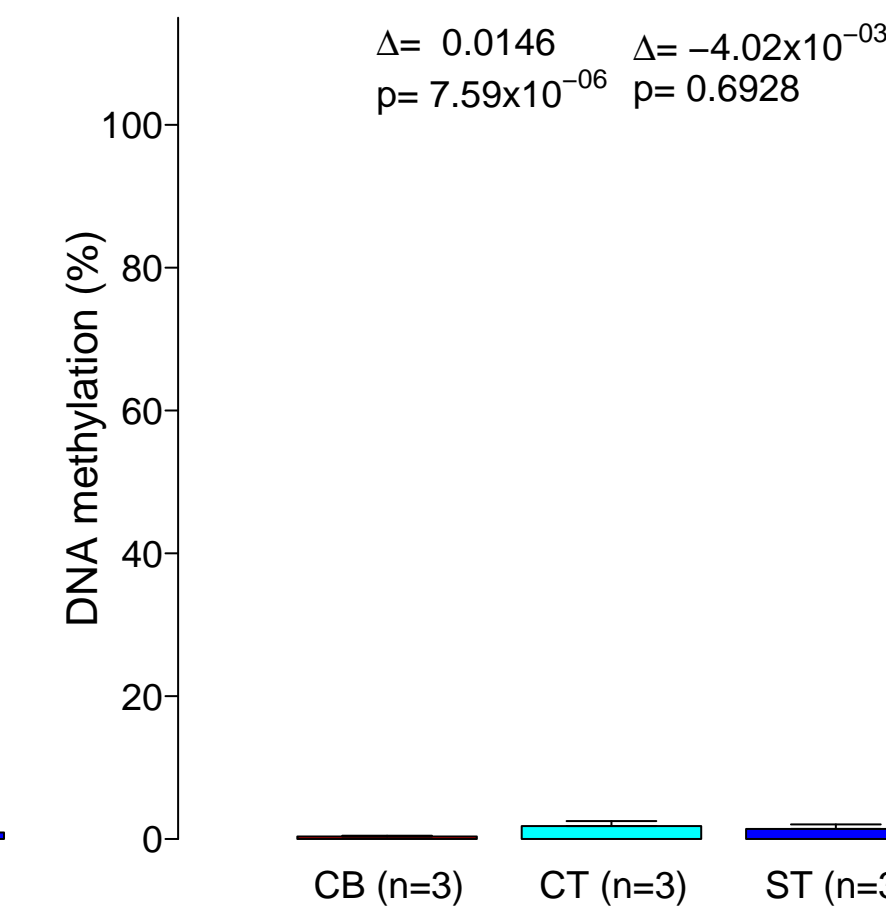

ZNF554 Chr19 2,819,841

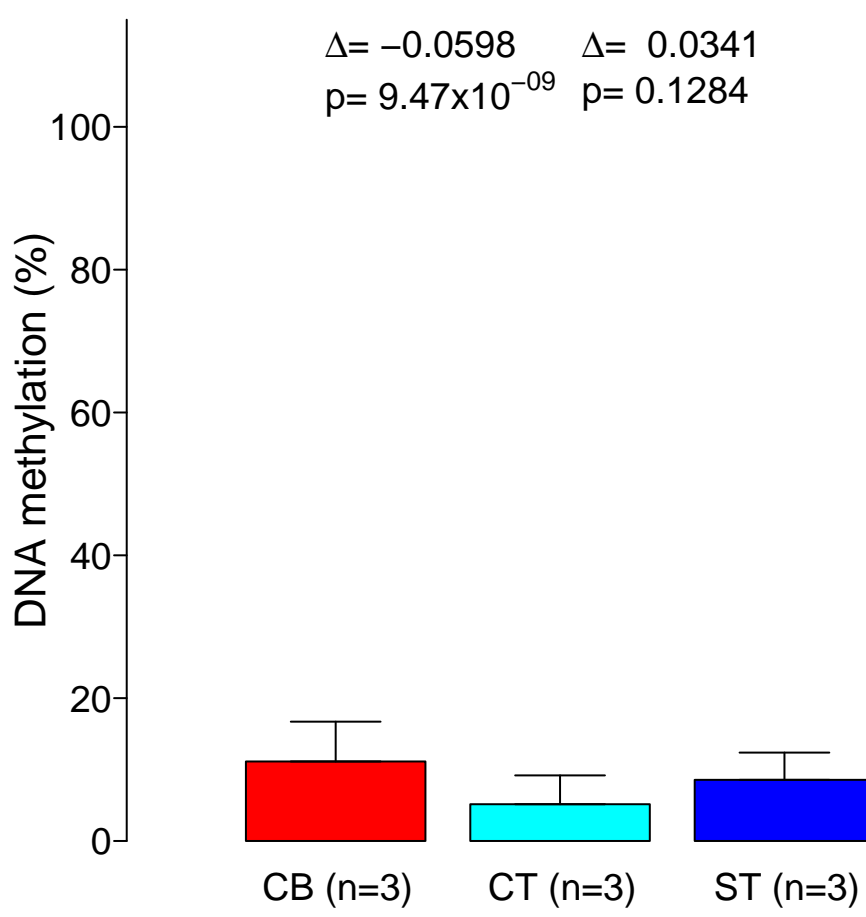

ZNF554 Chr19 2,819,849

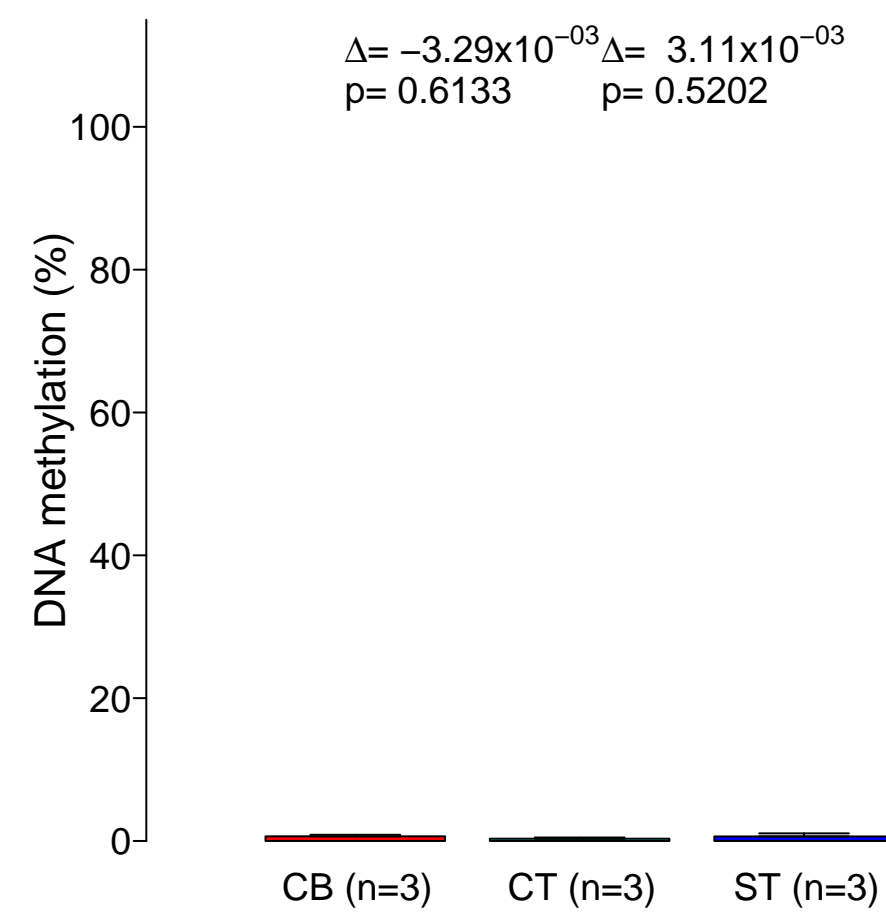

ZNF554 Chr19 2,819,856

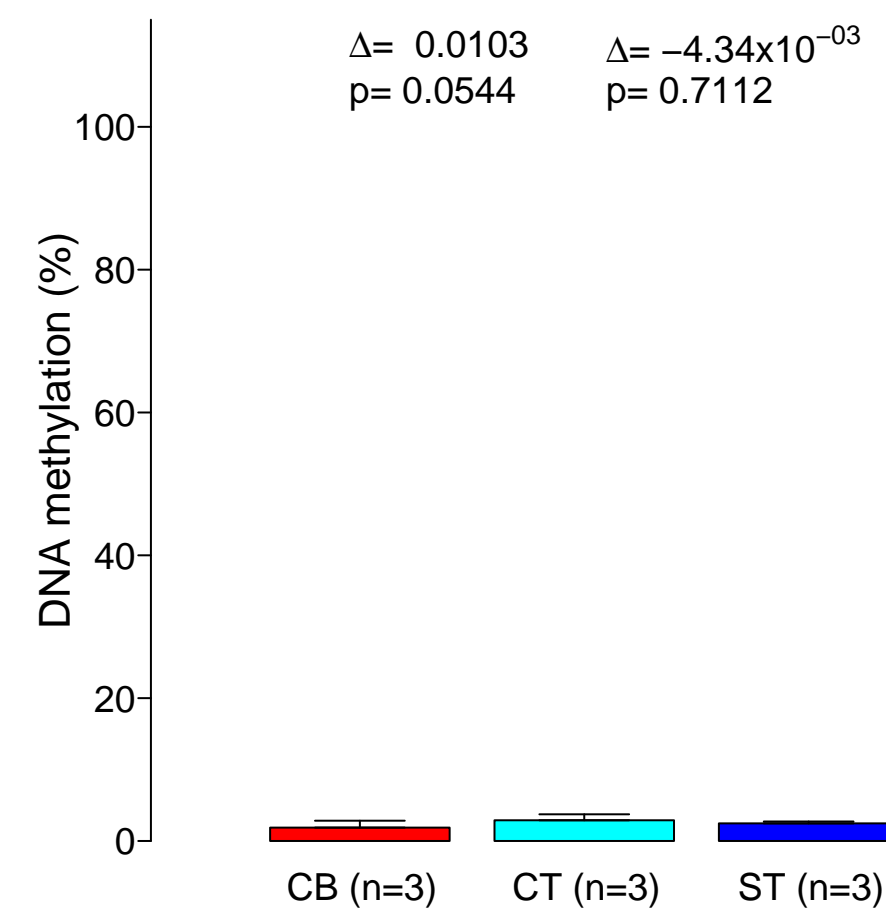

ZNF554 Chr19 2,819,862

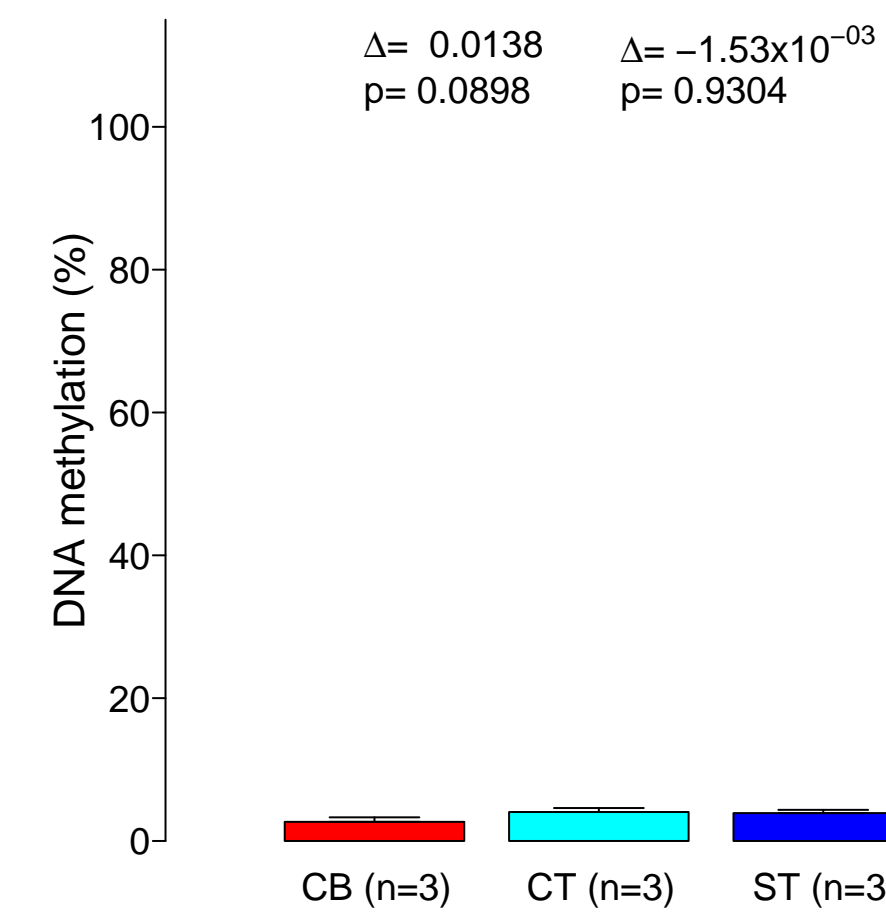

ZNF554 Chr19 2,819,870

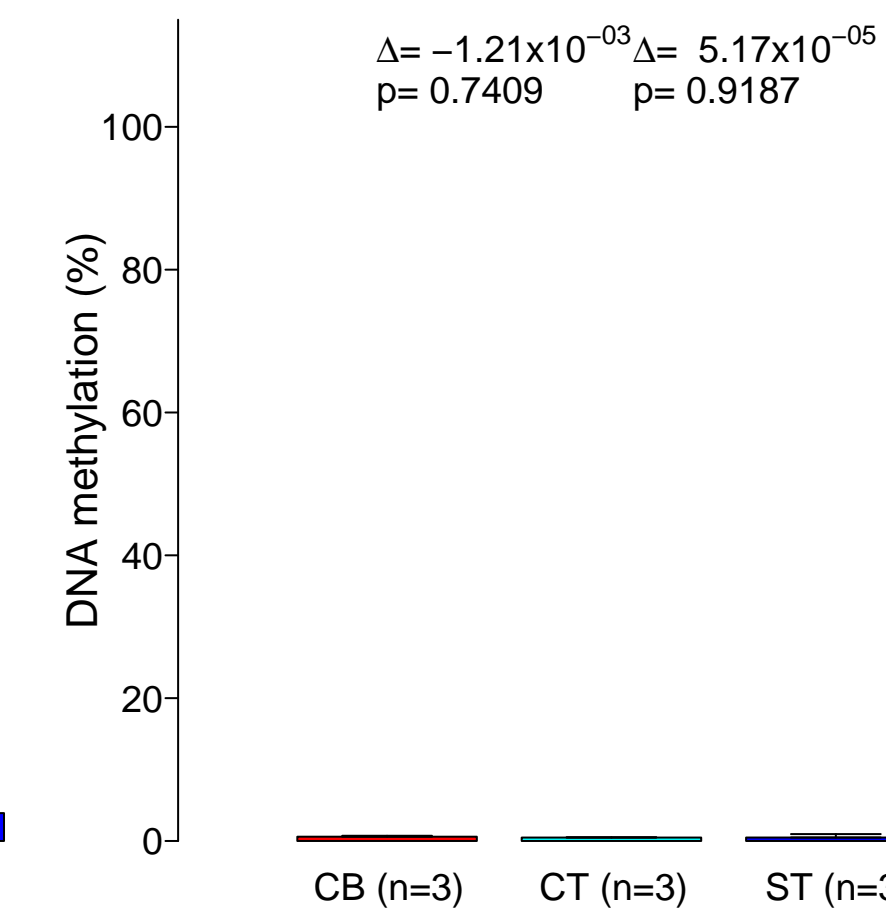

ZNF554 Chr19 2,819,884

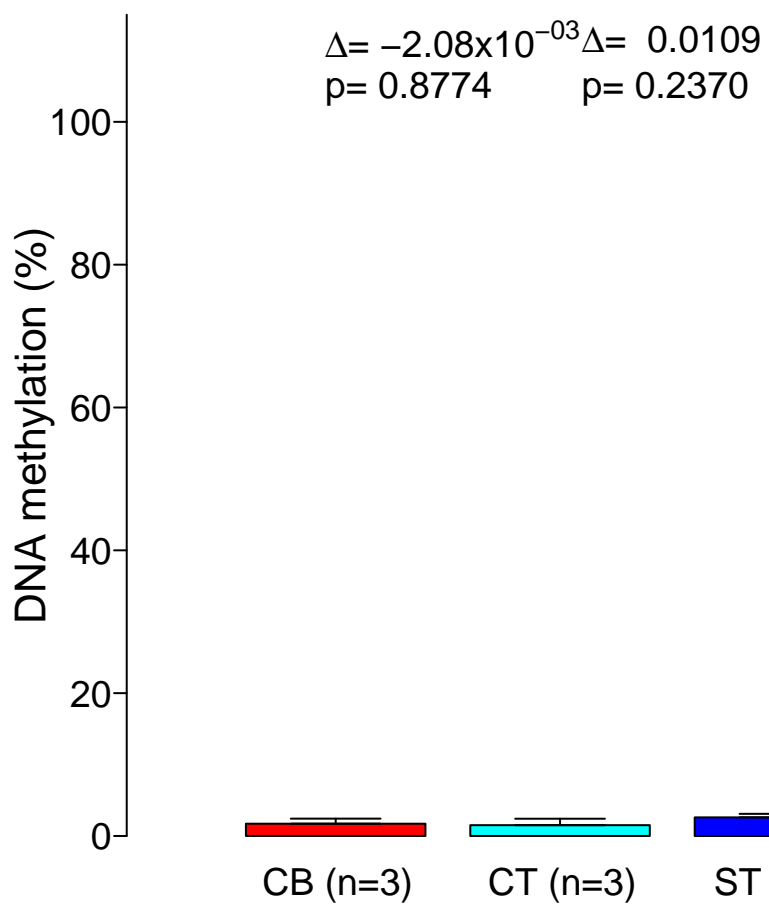

ZNF554 Chr19 2,819,886

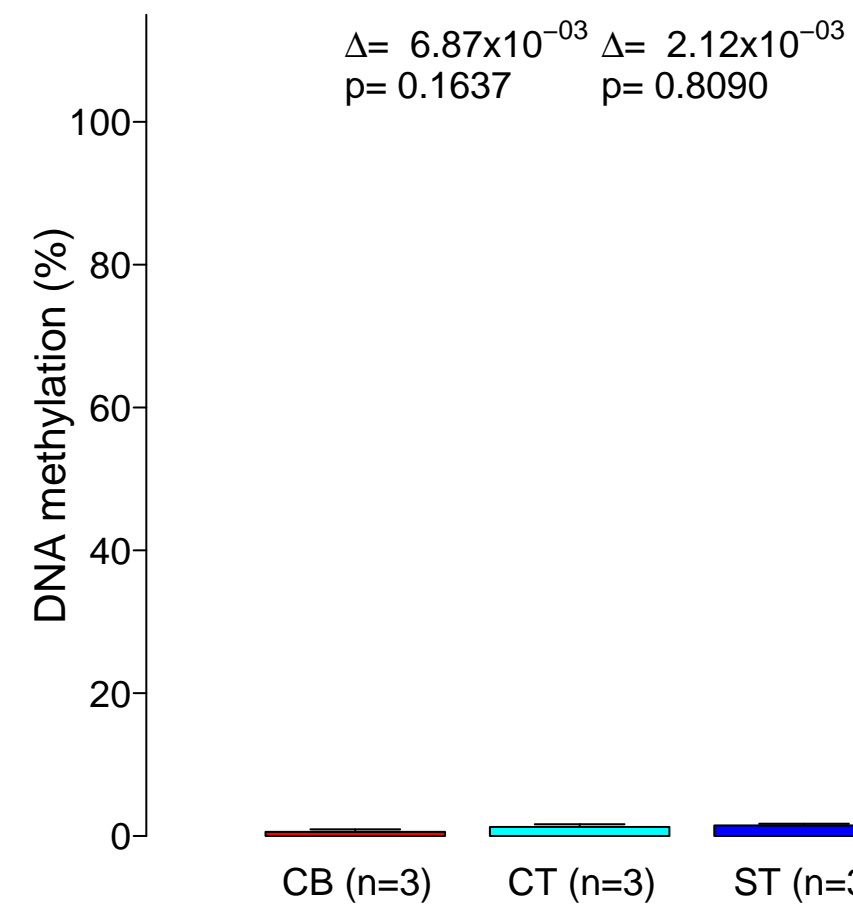

ZNF554 Chr19 2,819,888

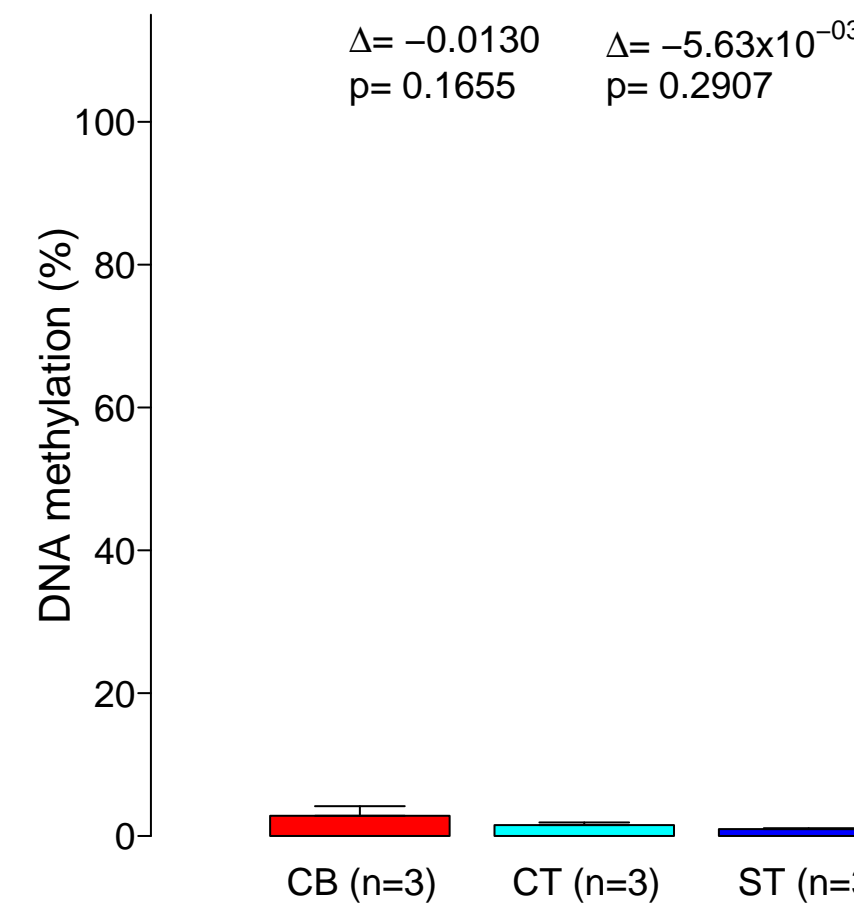

ZNF554 Chr19 2,819,891

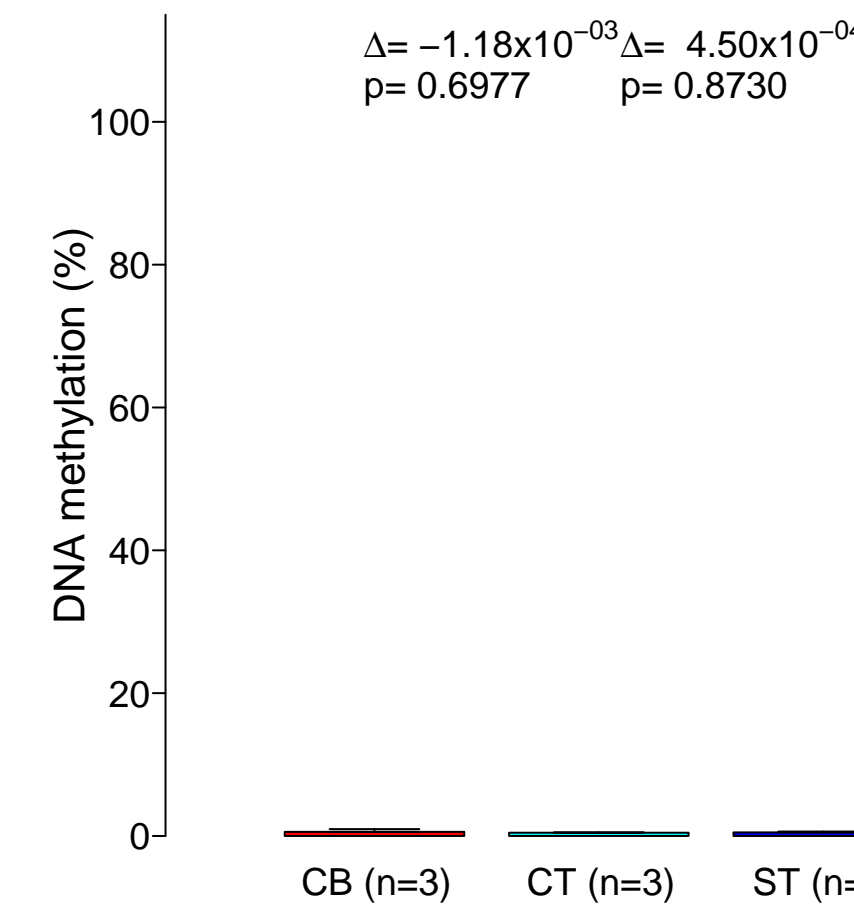

ZNF554 Chr19 2,819,903

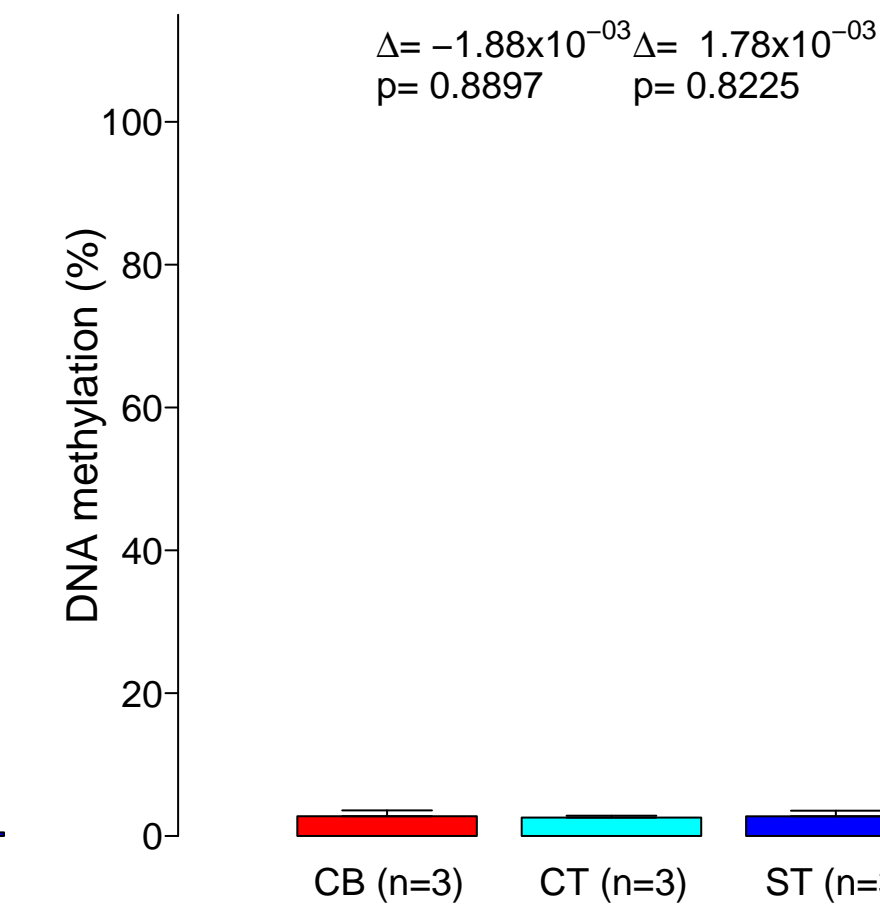

ZNF554 Chr19 2,819,906

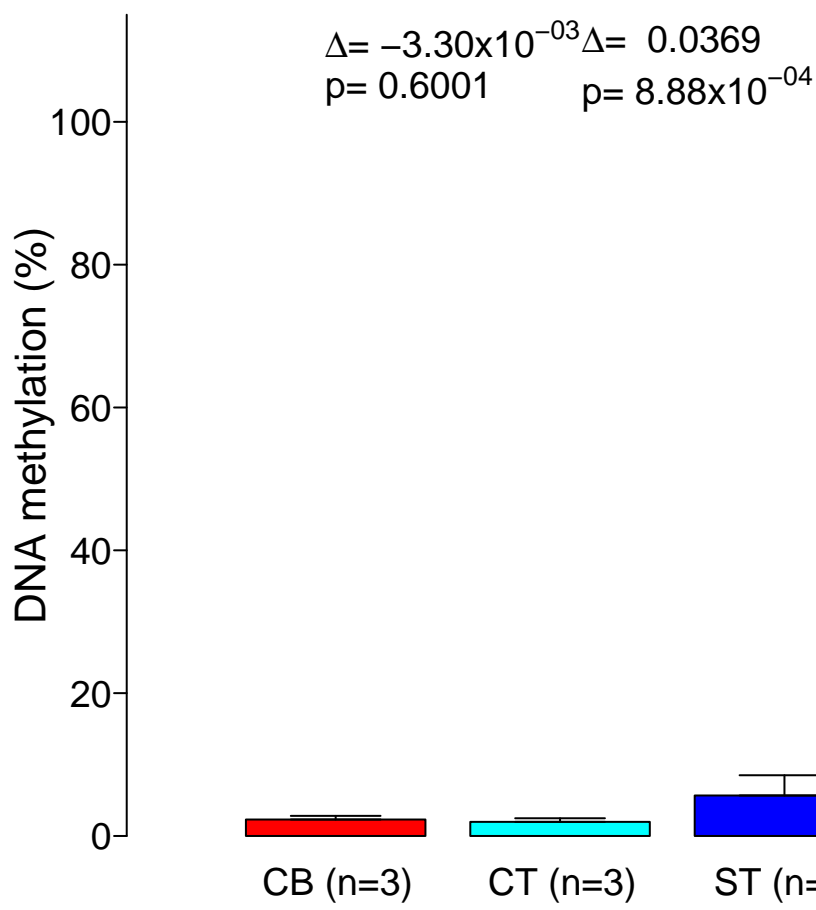

ZNF554 Chr19 2,819,912

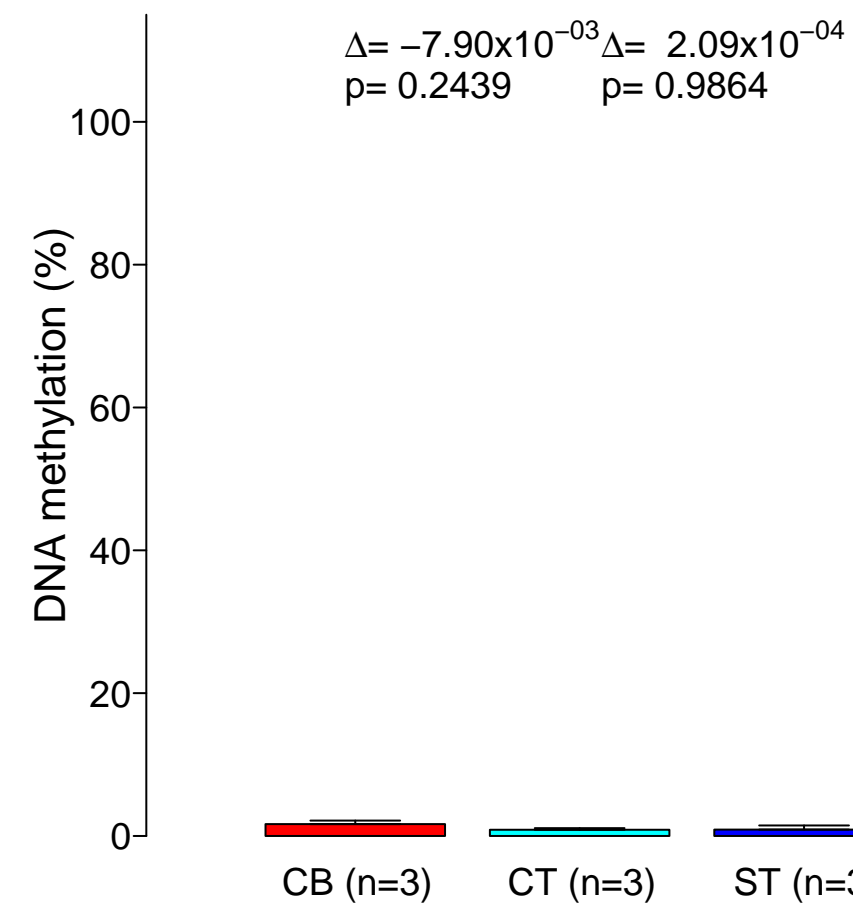

ZNF554 Chr19 2,819,915

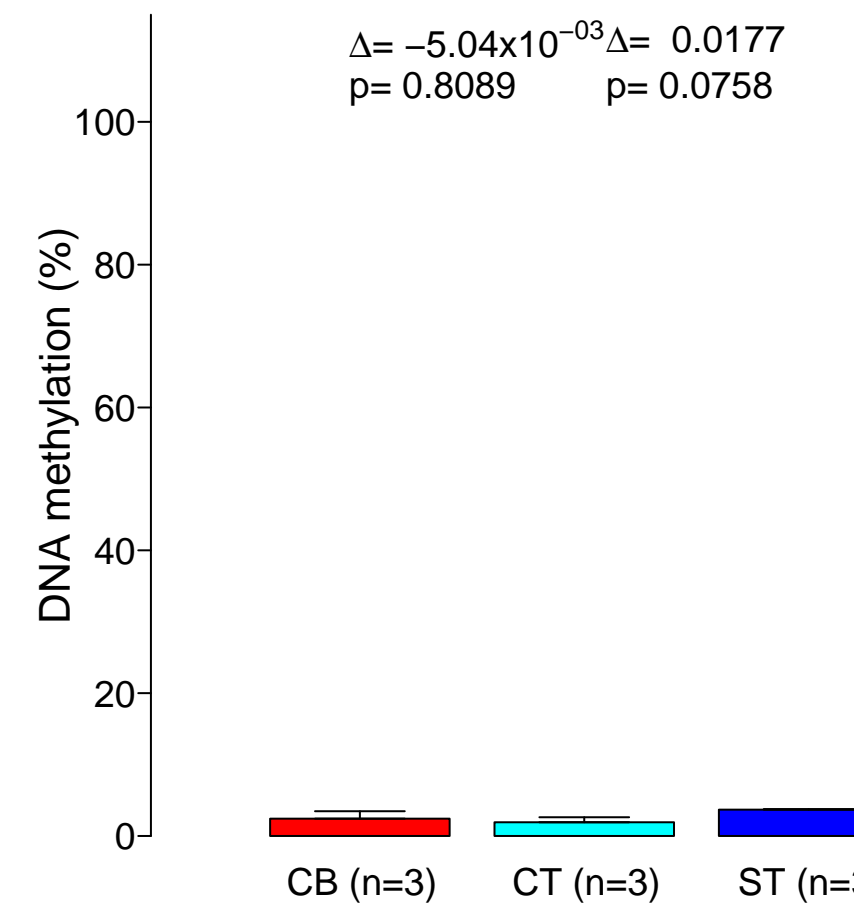

ZNF554 Chr19 2,819,930

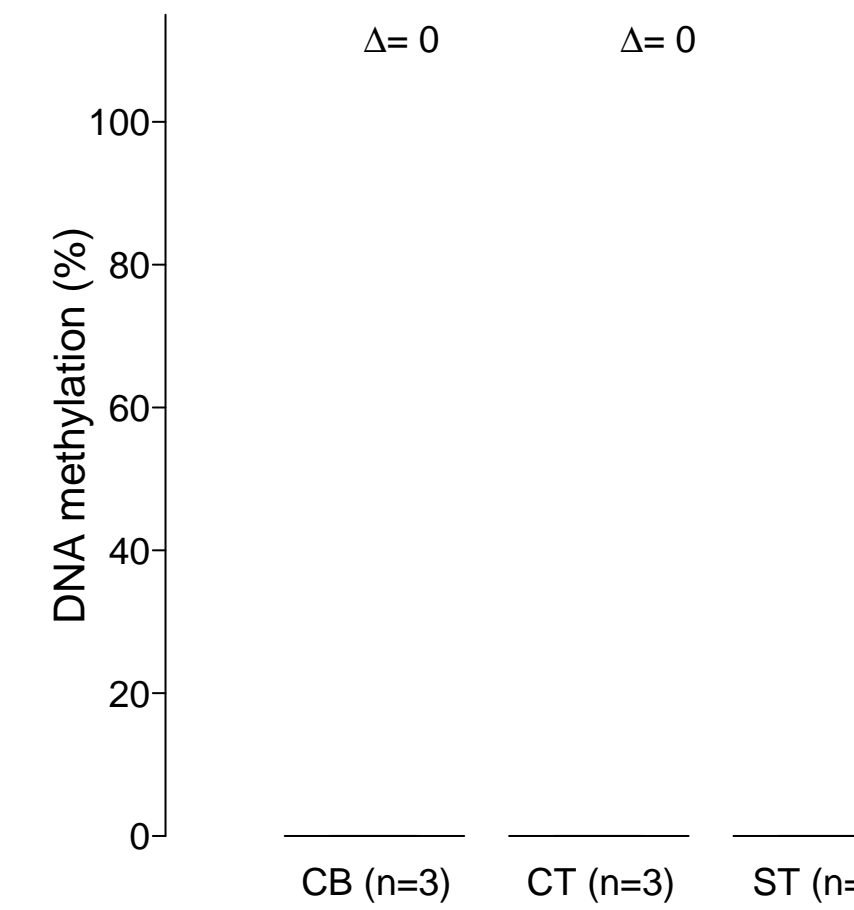

ZNF554 Chr19 2,819,936

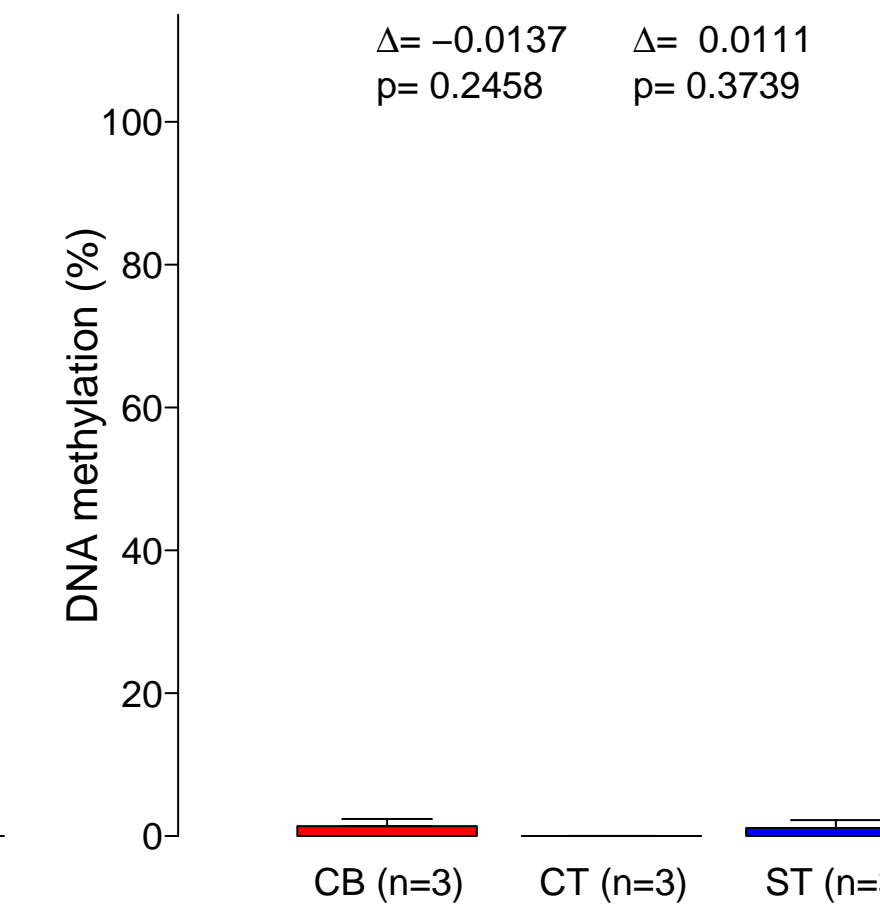

ZNF554 Chr19 2,819,943

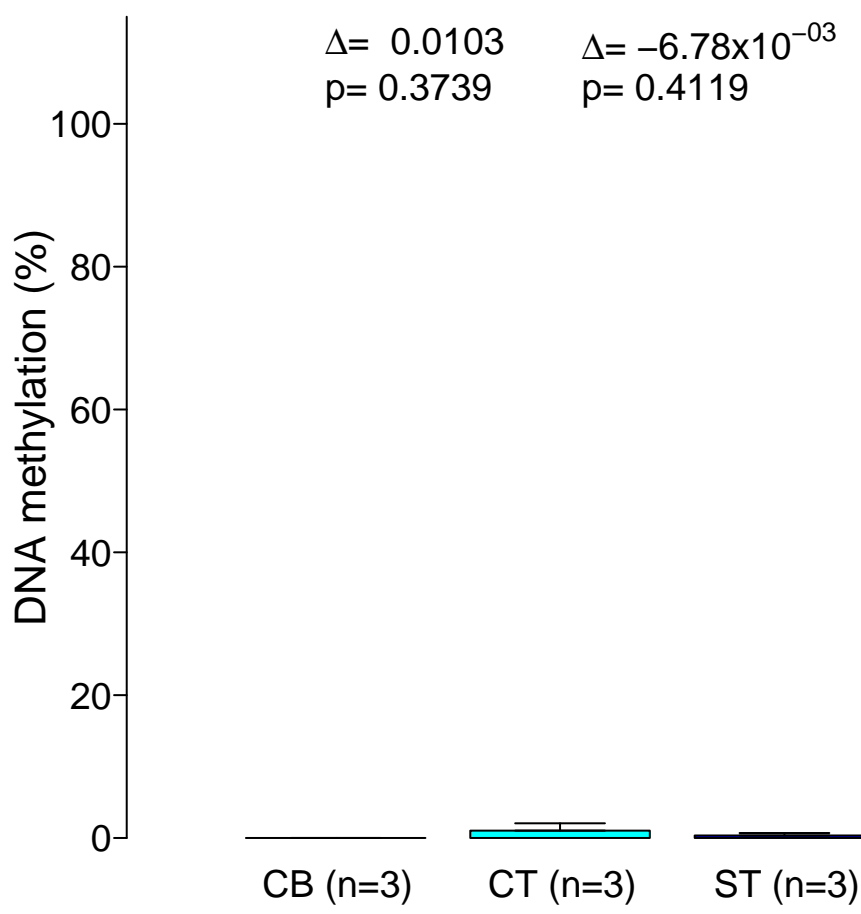

ZNF554 Chr19 2,819,947

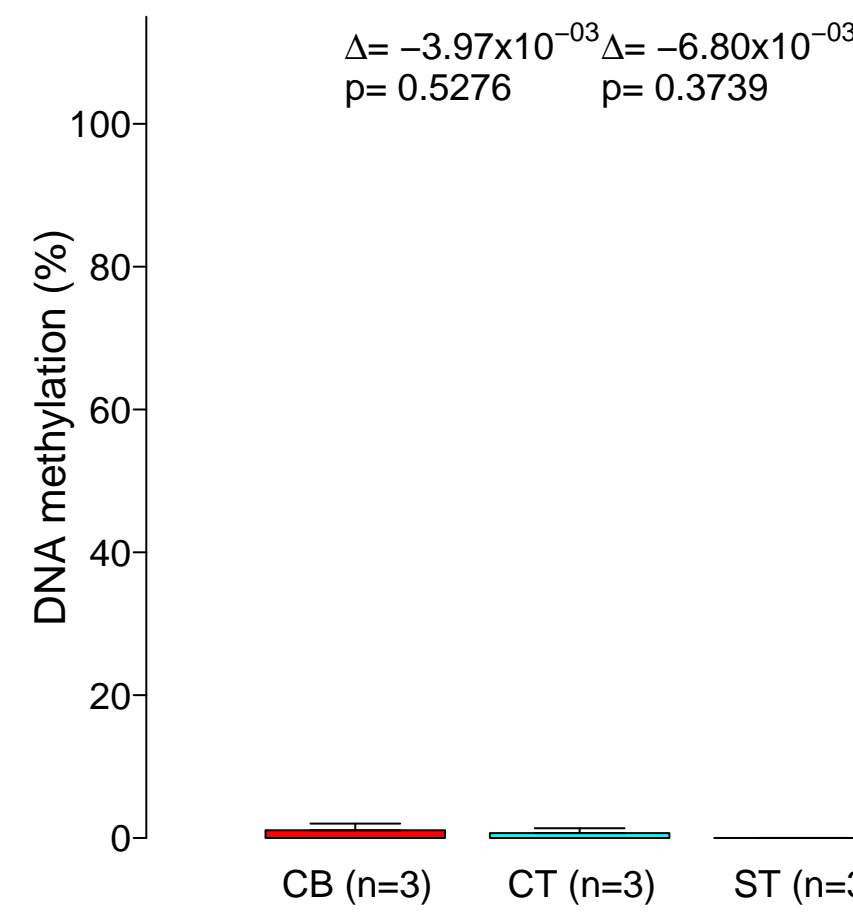

ZNF554 Chr19 2,819,952

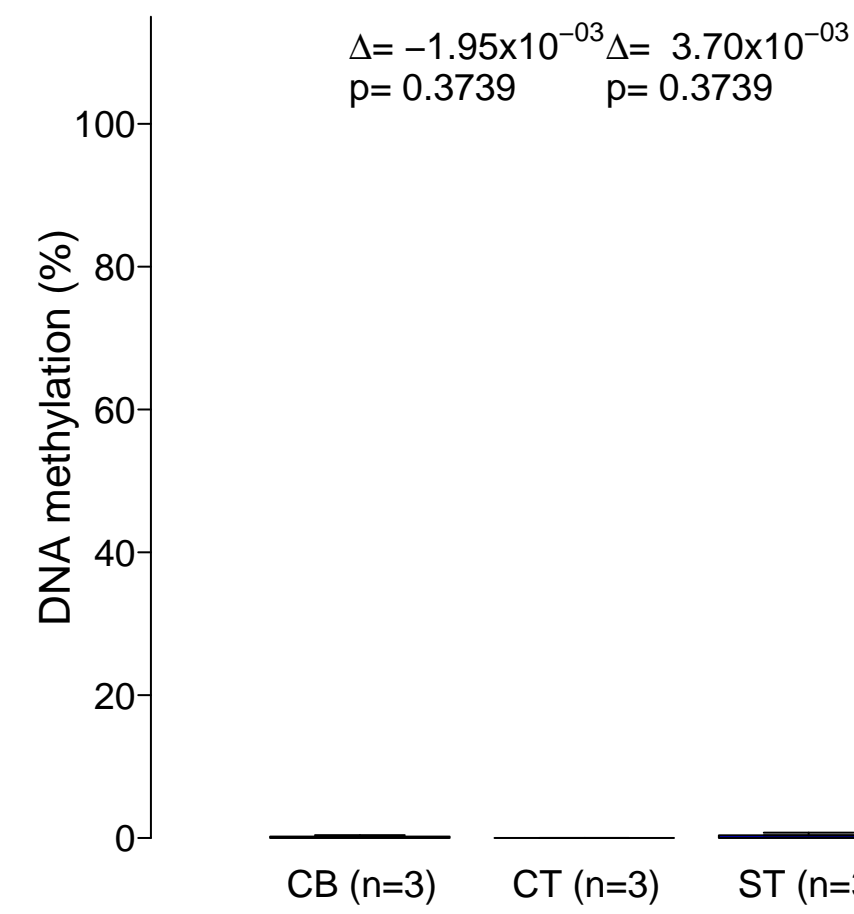

ZNF554 Chr19 2,819,956

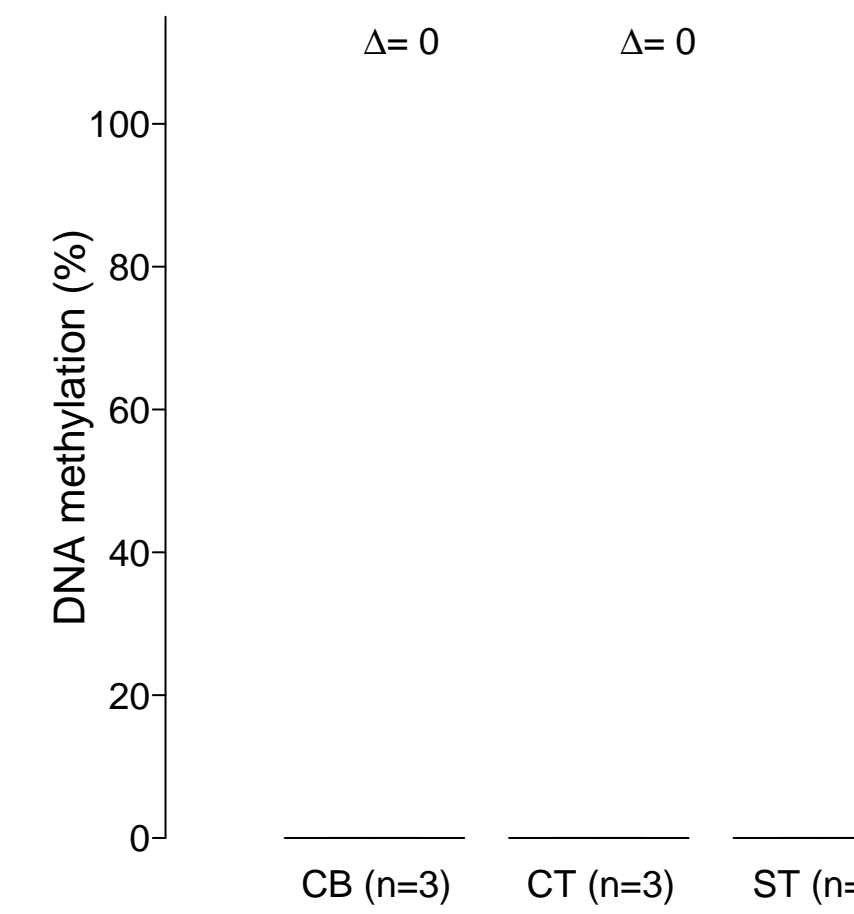

ZNF554 Chr19 2,819,959

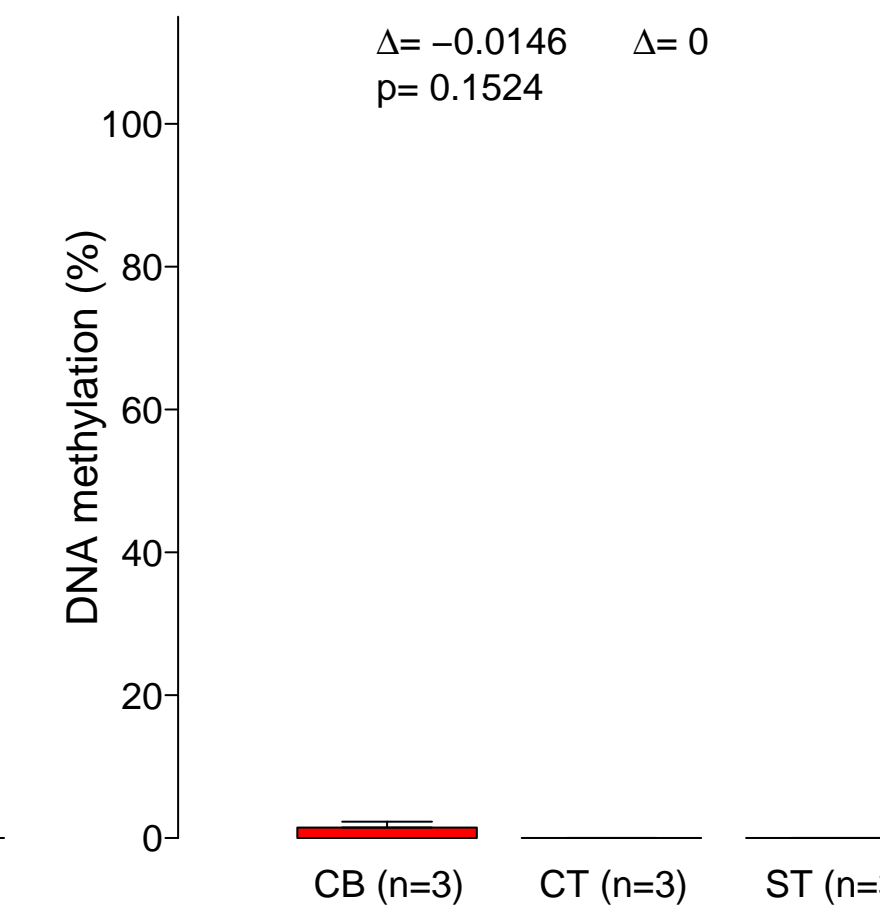

ZNF554 Chr19 2,819,967

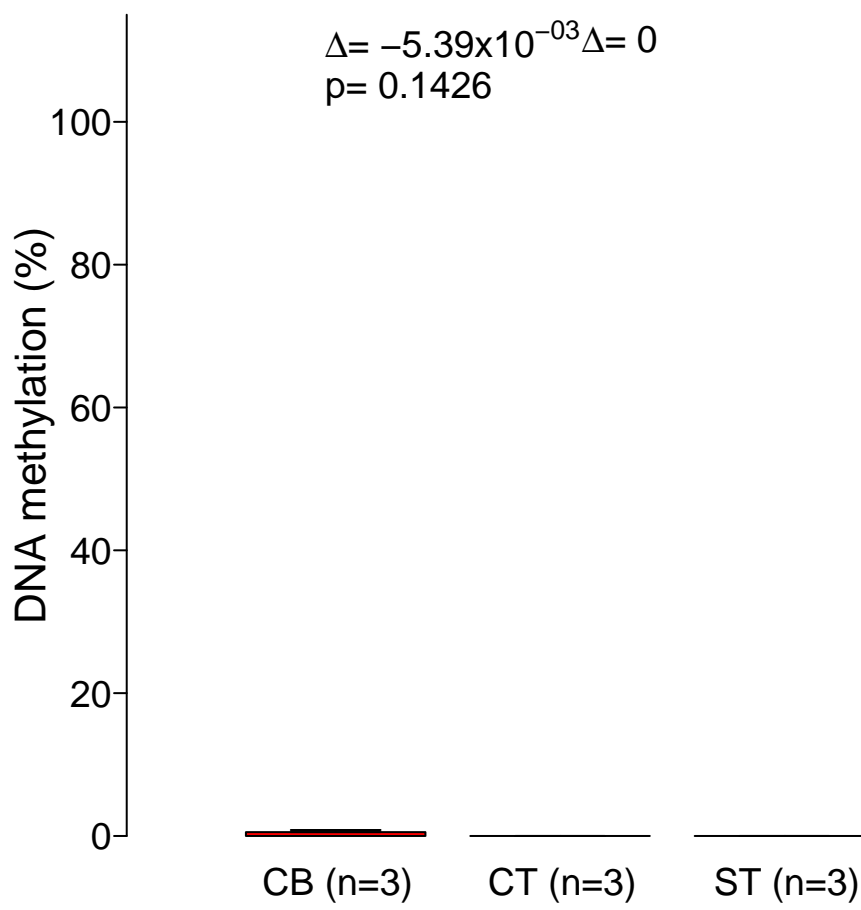

ZNF554 Chr19 2,819,971

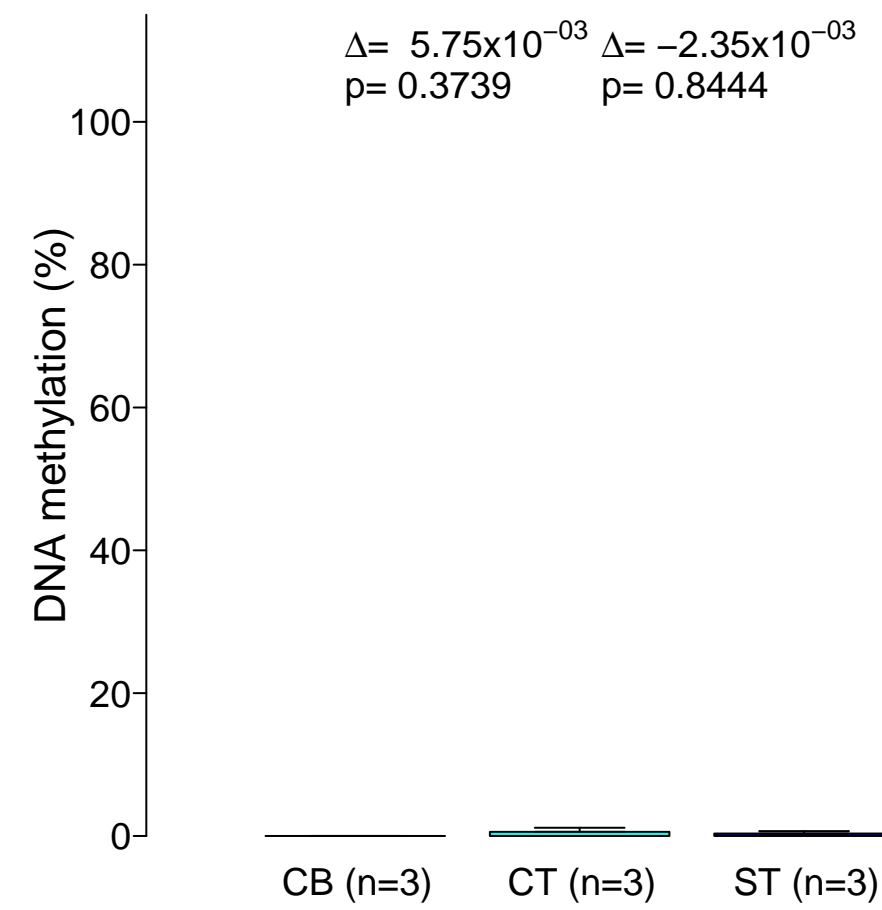

ZNF554 Chr19 2,819,980

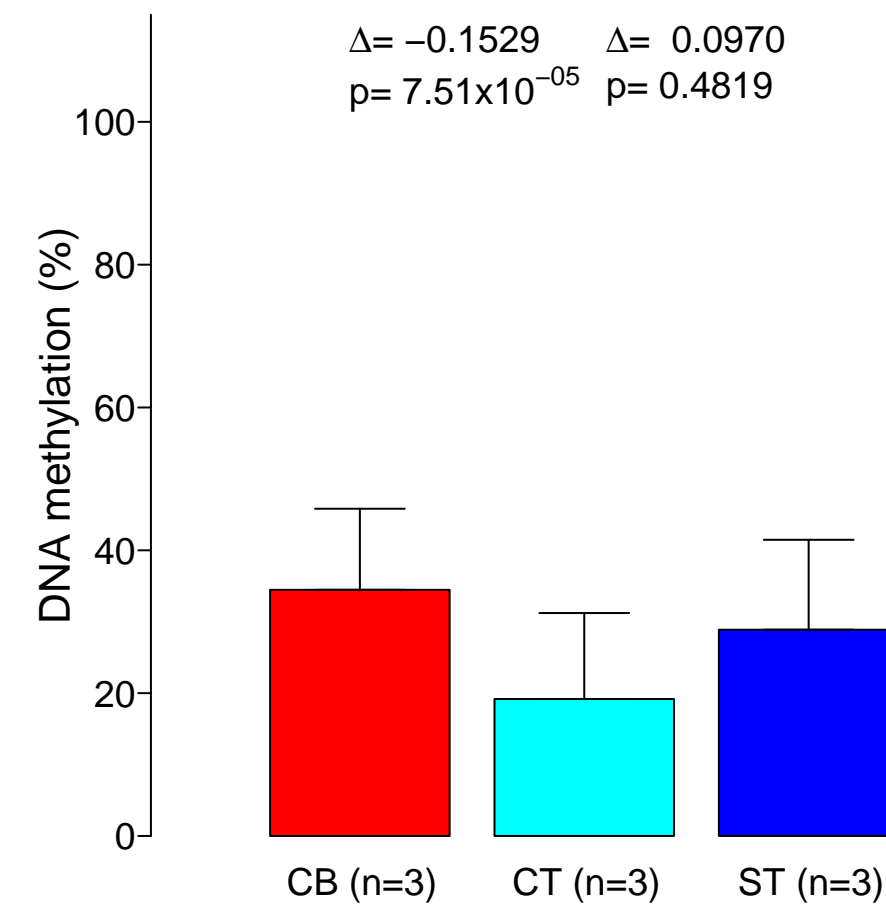

ZNF554 Chr19 2,819,993

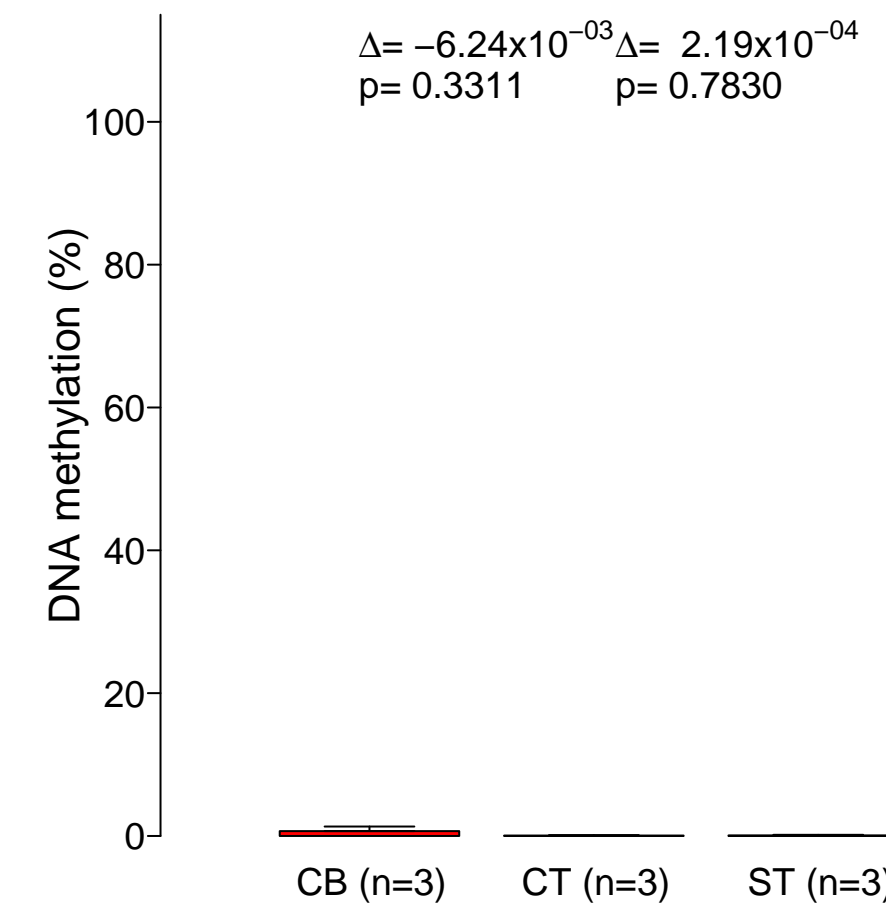

ZNF554 Chr19 2,820,005

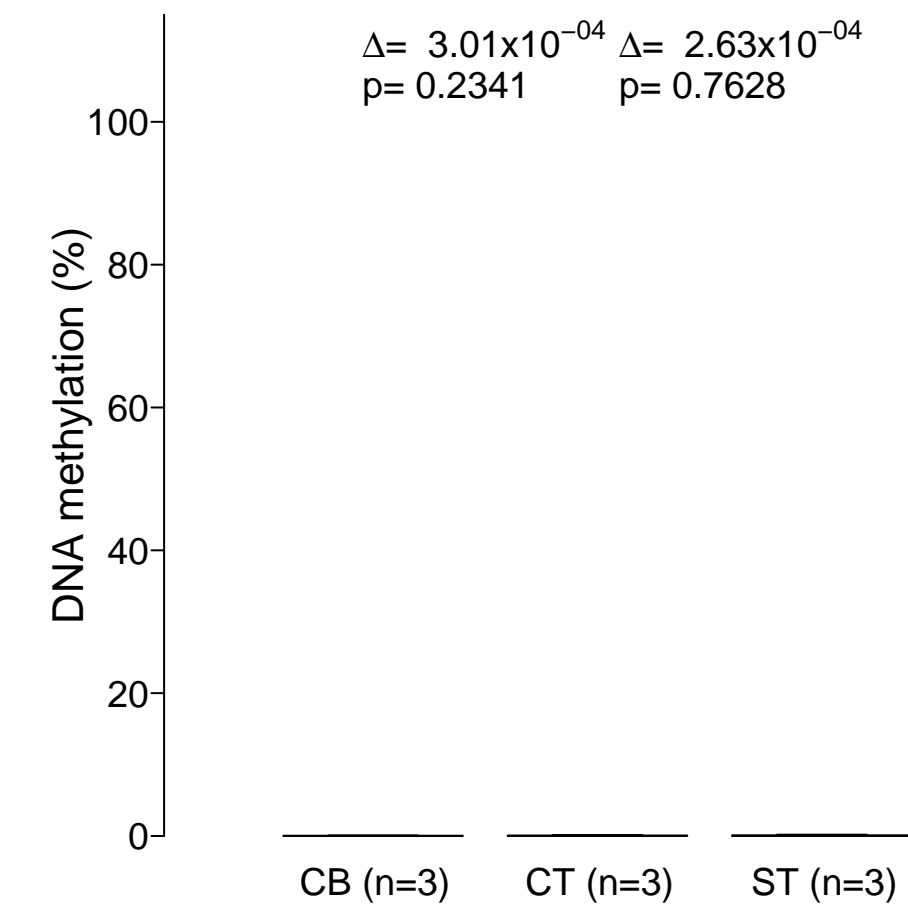

ZNF554 Chr19 2,820,009

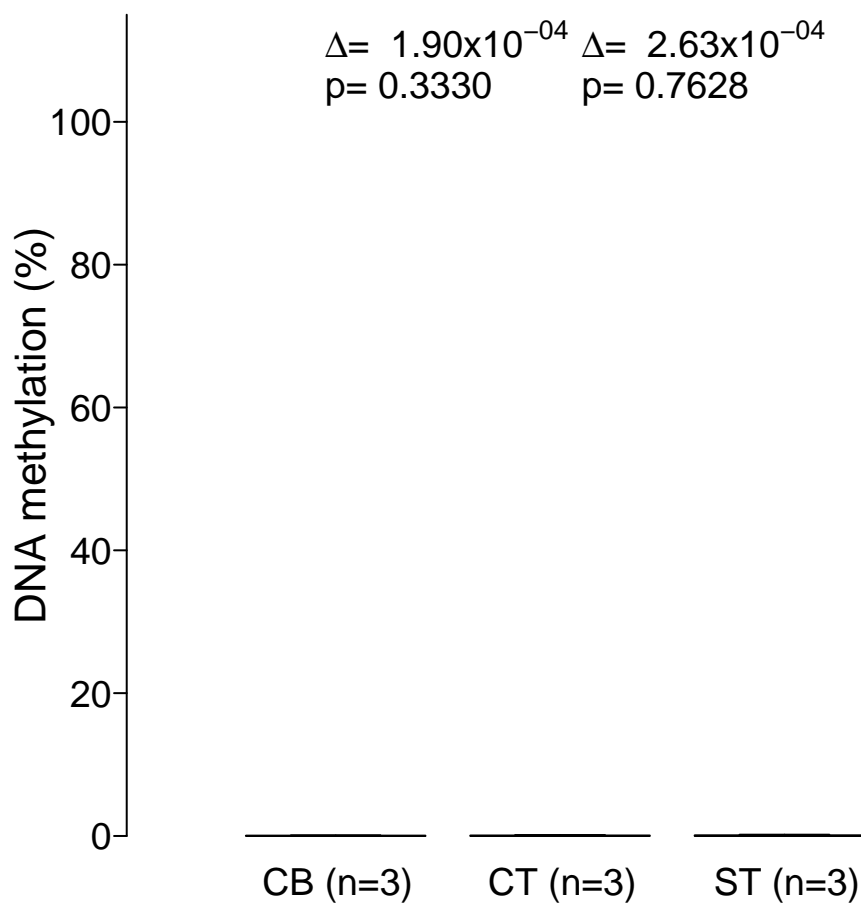

ZNF554 Chr19 2,820,018

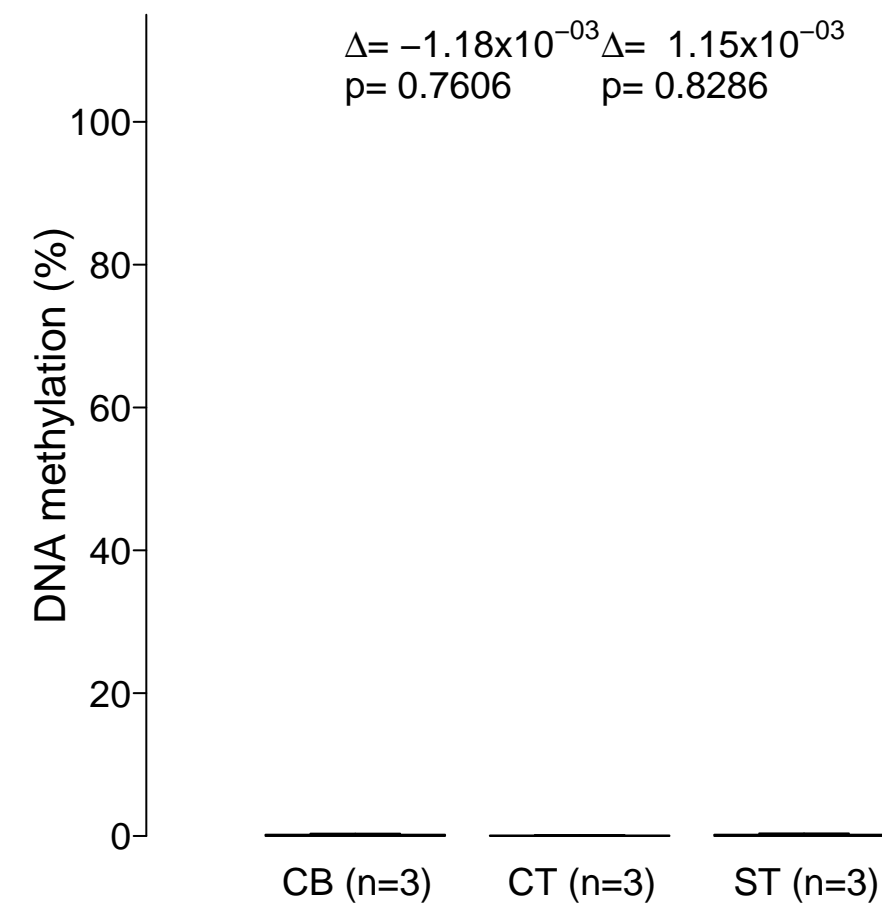

ZNF554 Chr19 2,820,023

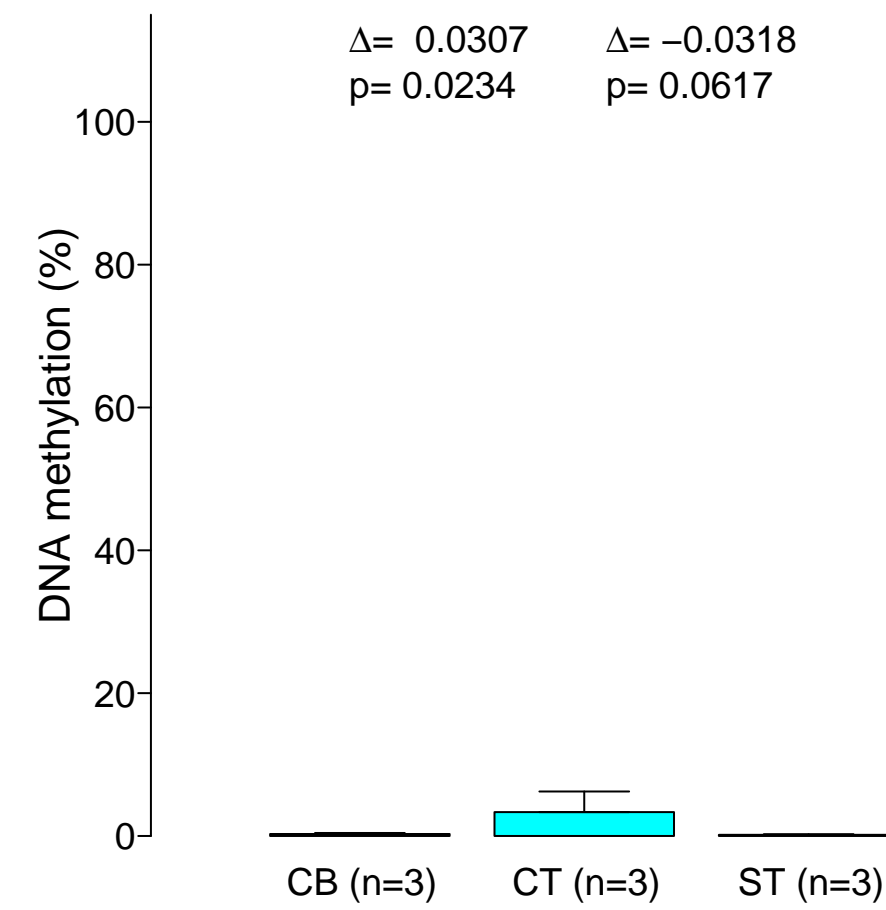

ZNF554 Chr19 2,820,029

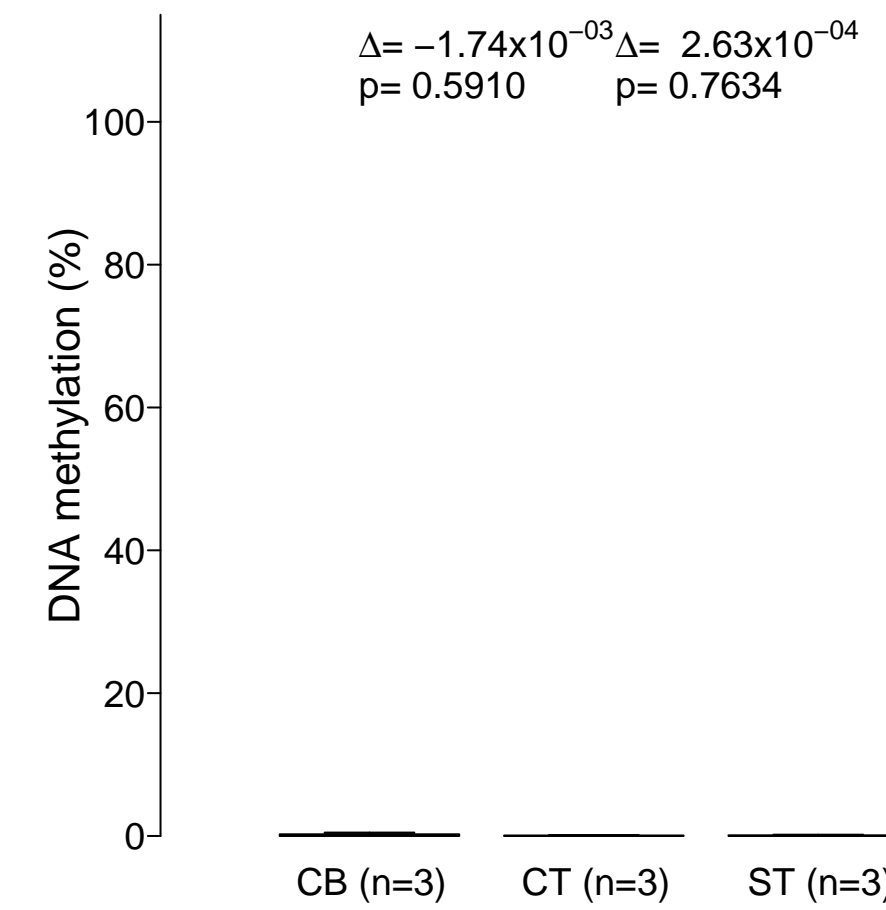

ZNF554 Chr19 2,820,034

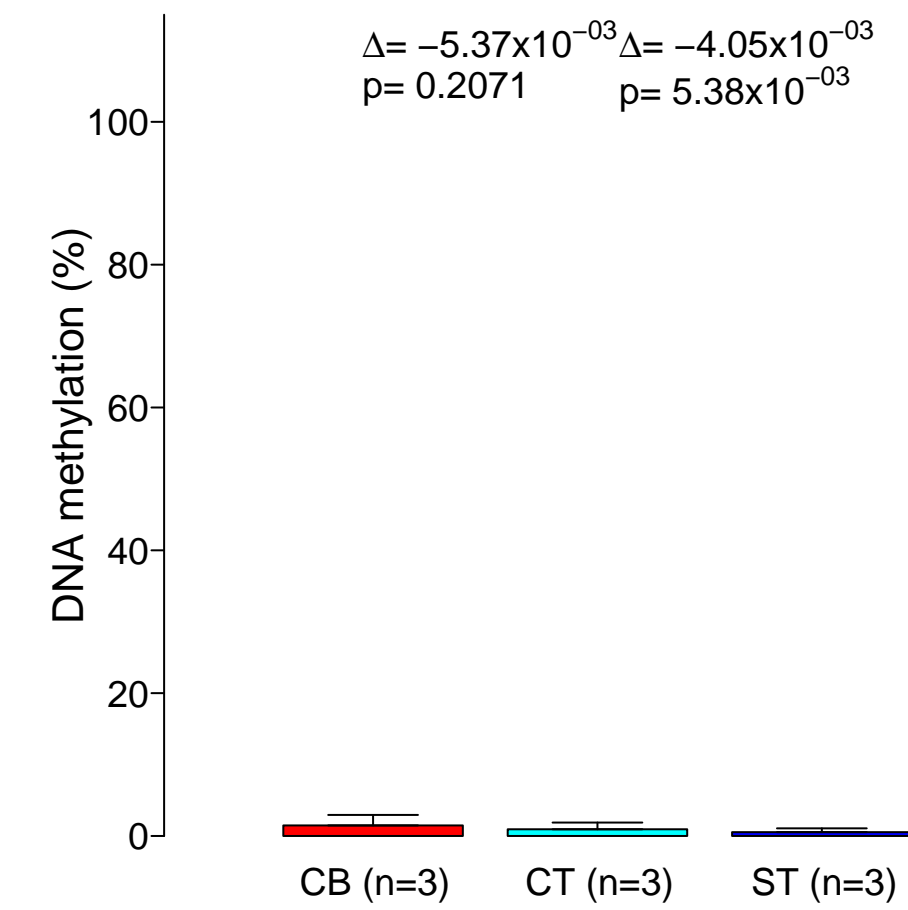

ZNF554 Chr19 2,820,050

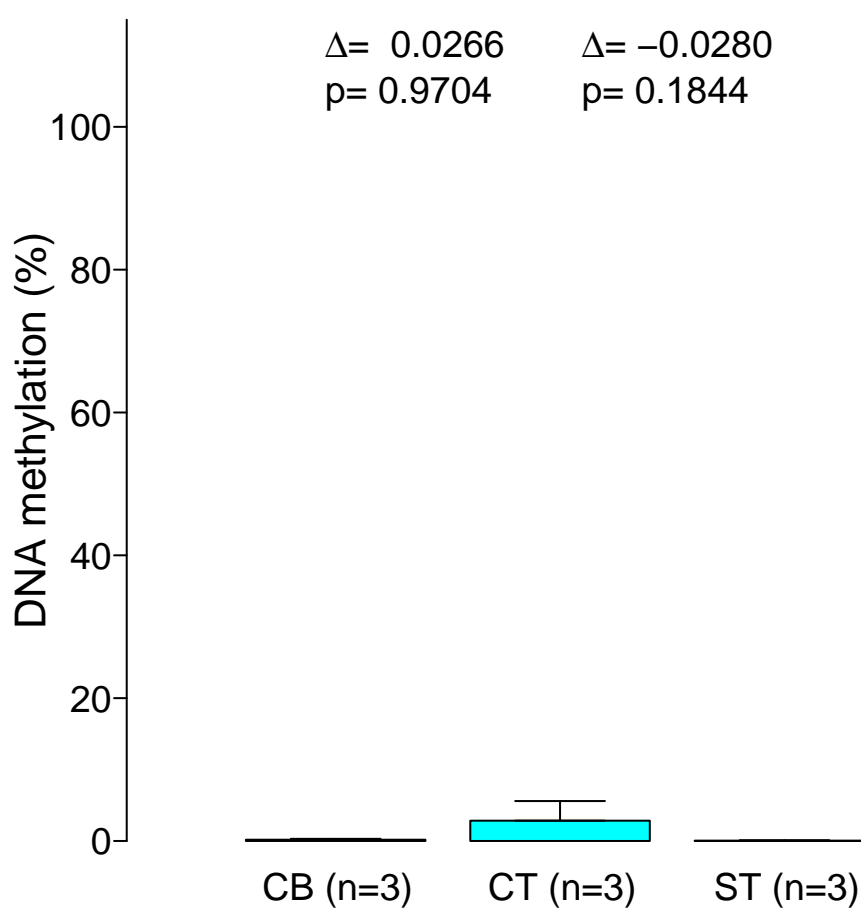

ZNF554 Chr19 2,820,058

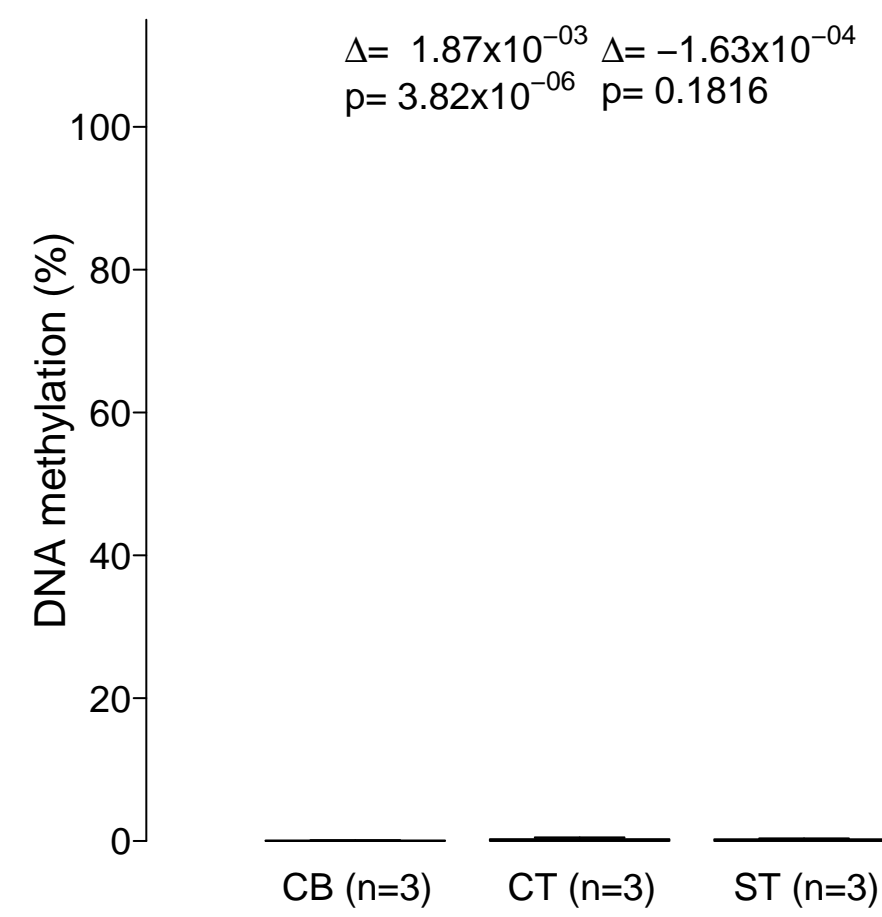

ZNF554 Chr19 2,820,060

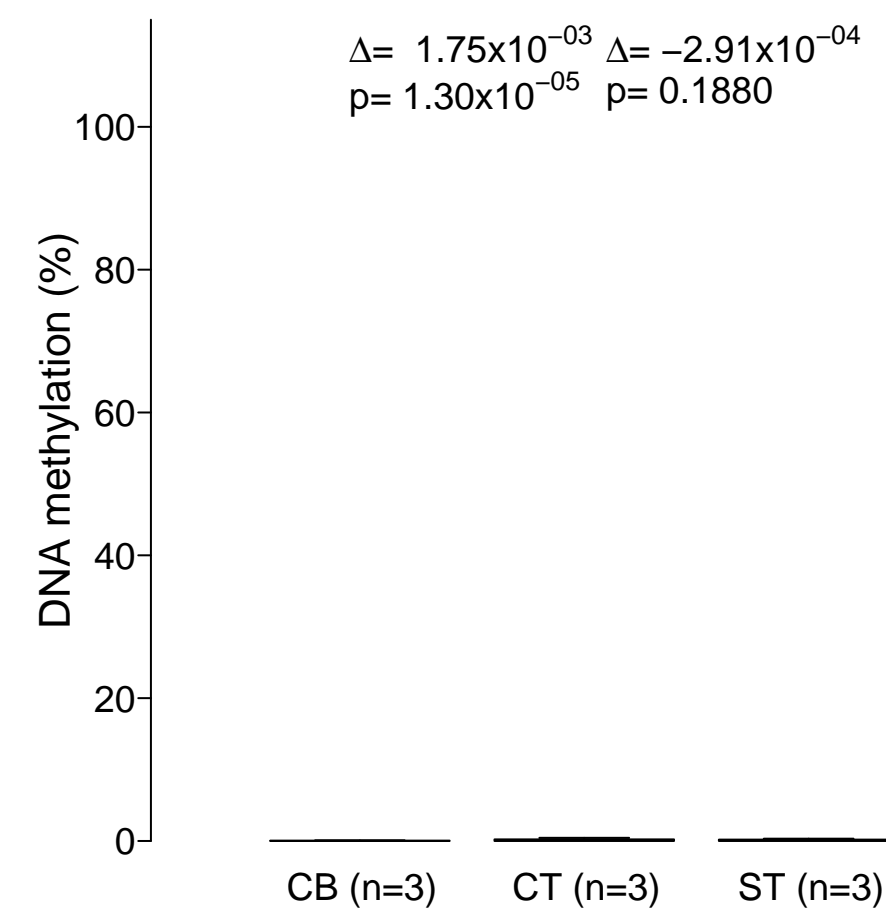

ZNF554 Chr19 2,820,062

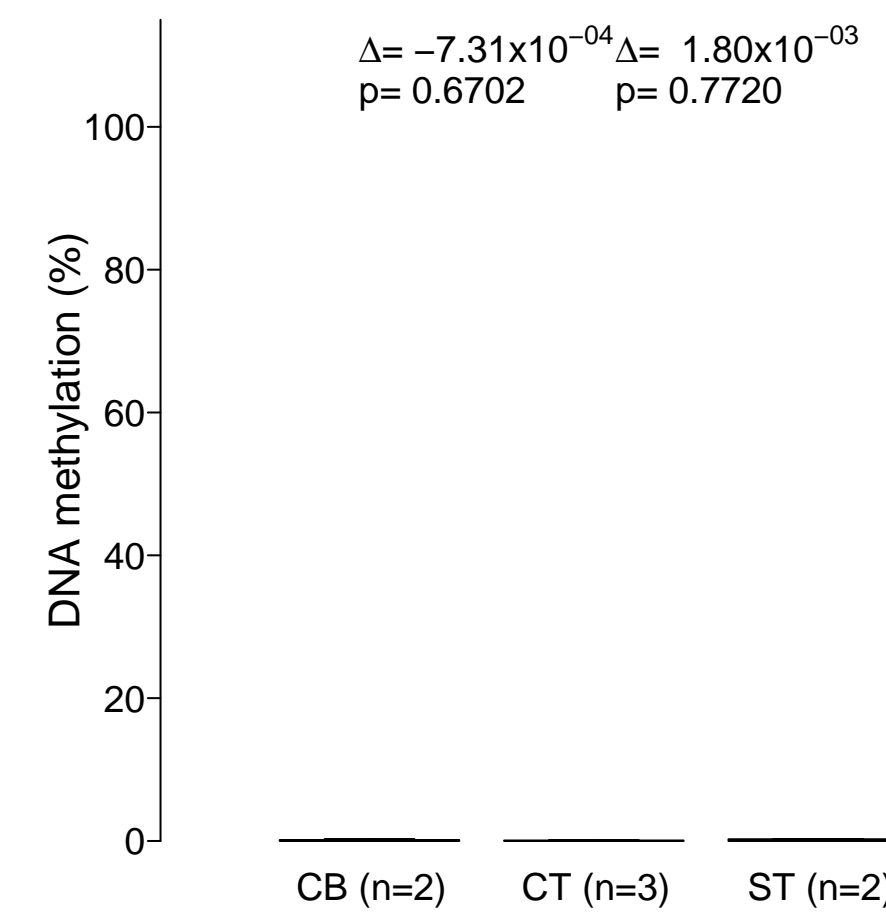

ZNF554 Chr19 2,820,067

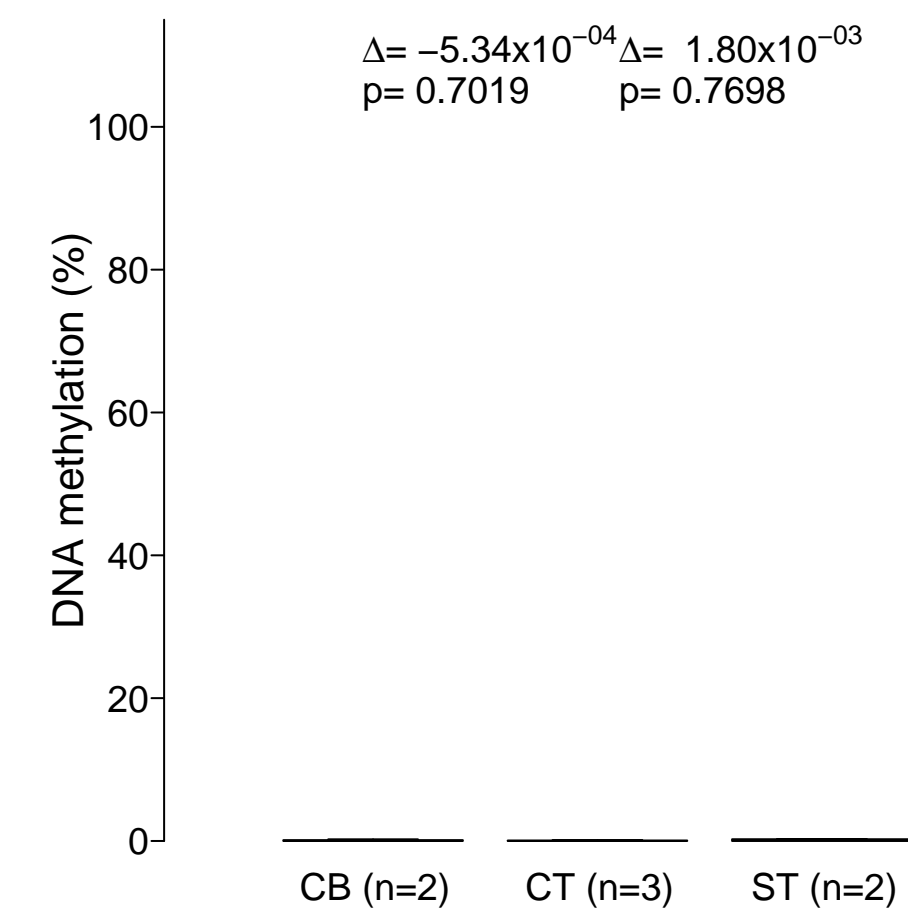



ZNF554 Chr19 2,820,080

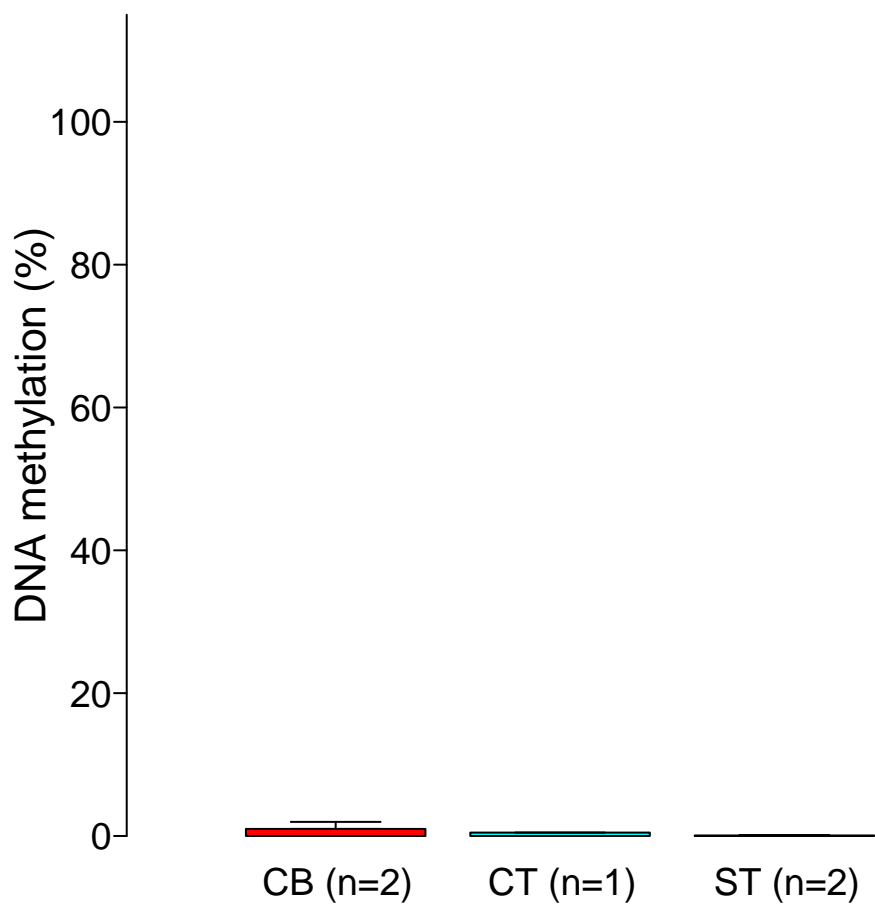

ZNF554 Chr19 2,820,093

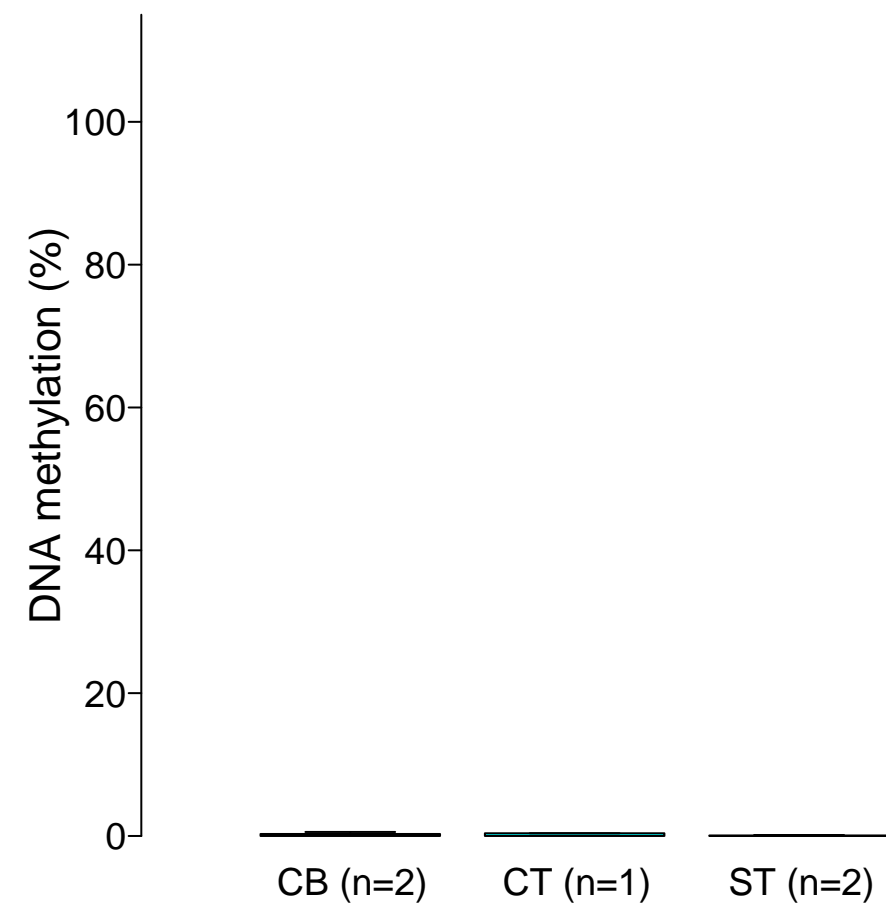

ZNF554 Chr19 2,820,096

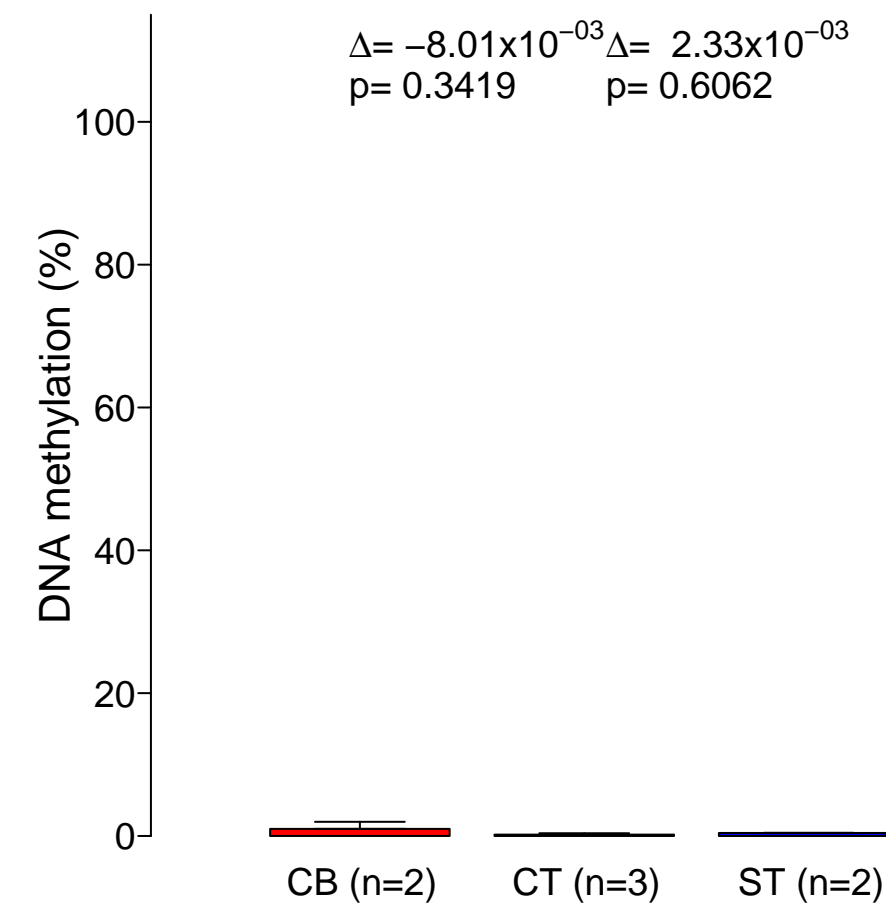

ZNF554 Chr19 2,820,098

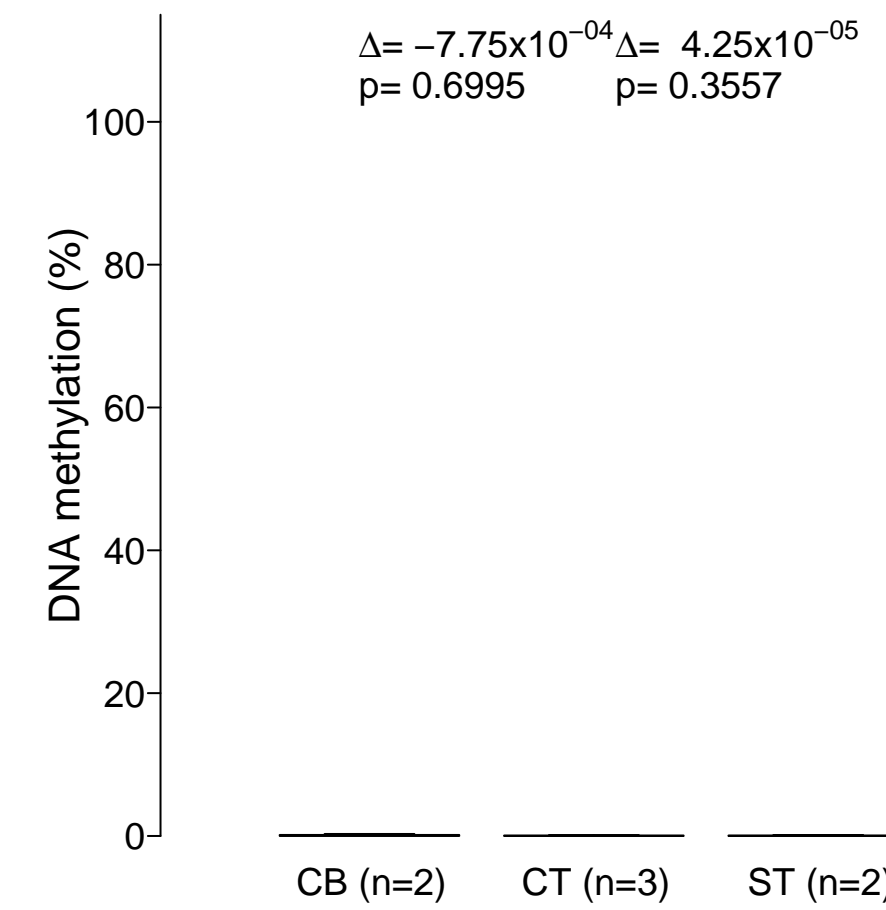

ZNF554 Chr19 2,820,100

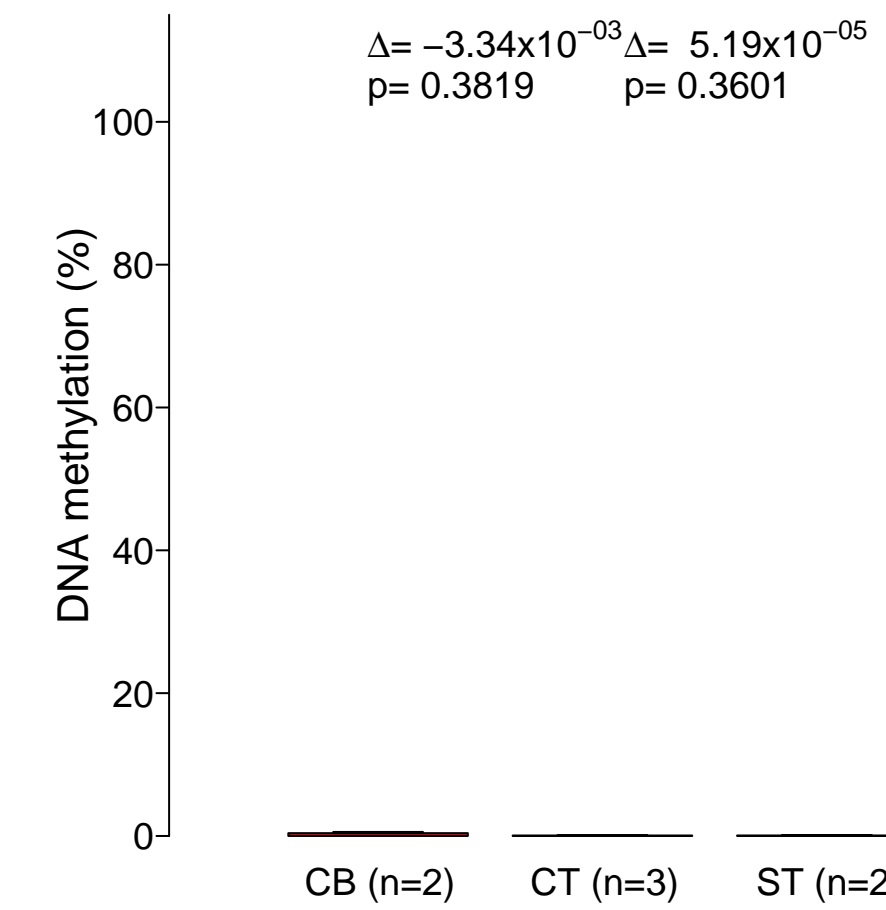

ZNF554 Chr19 2,820,102

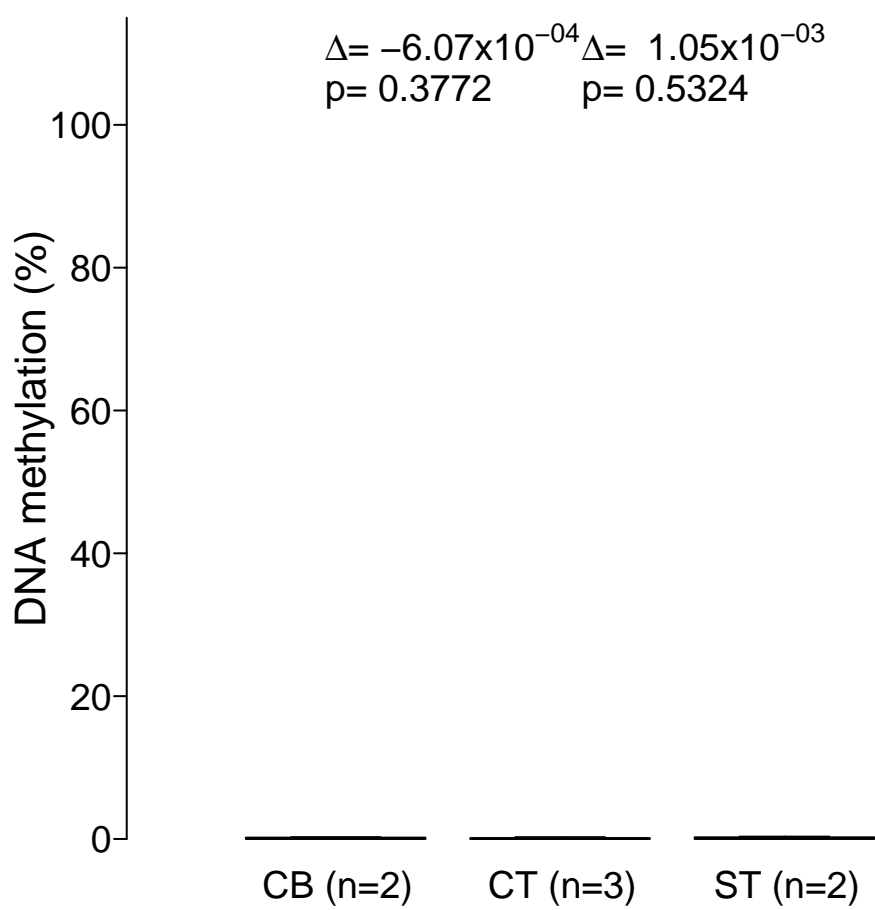

ZNF554 Chr19 2,820,109

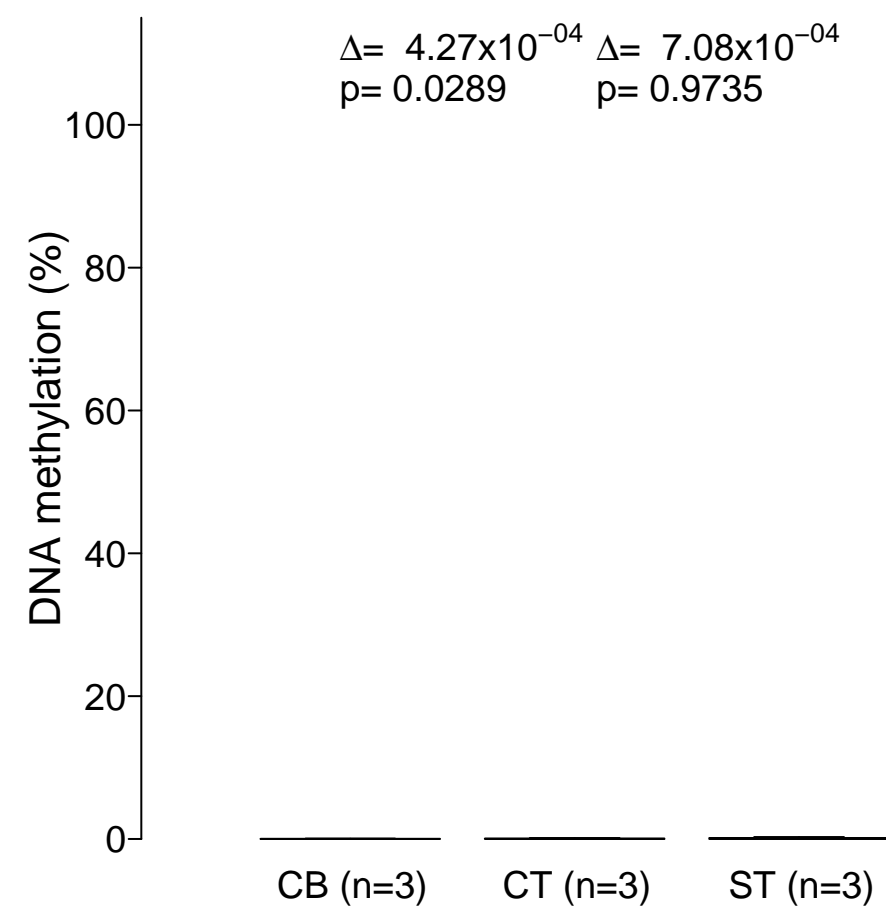

ZNF554 Chr19 2,820,121

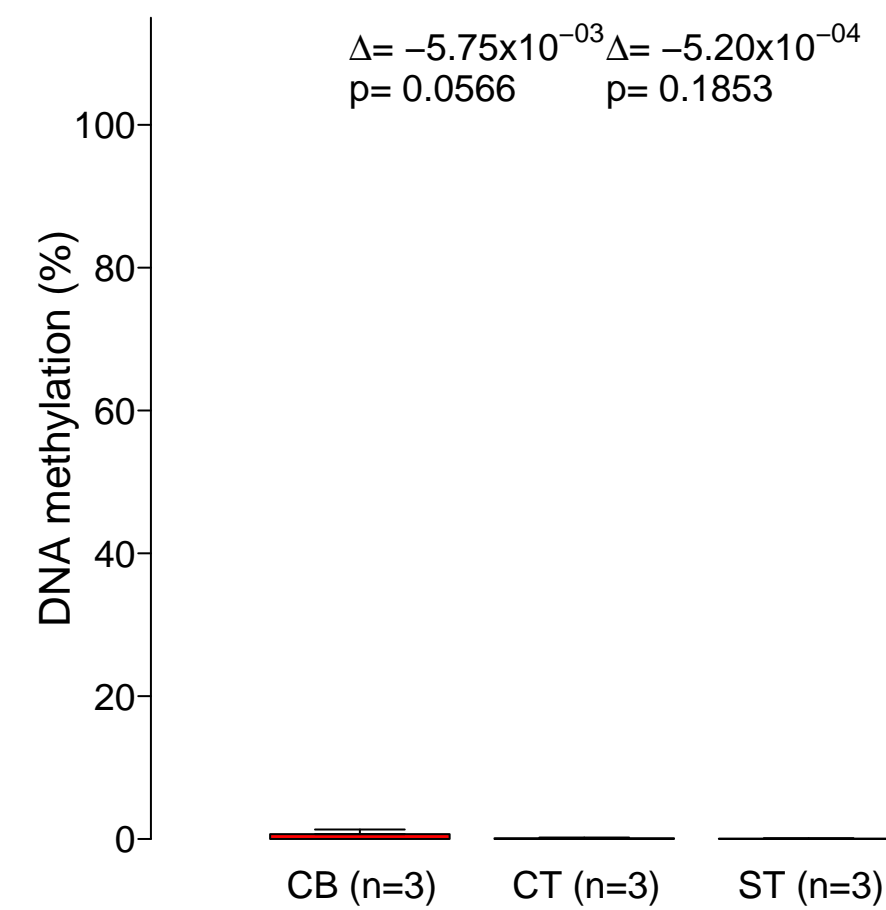

ZNF554 Chr19 2,820,130

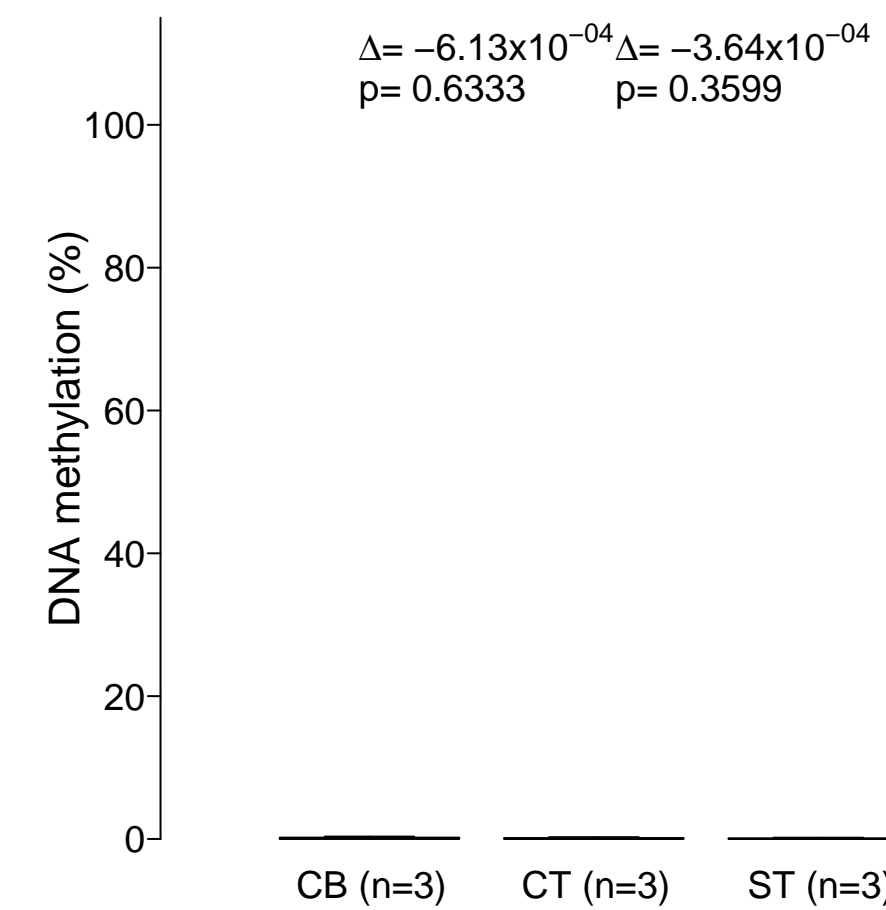

ZNF554 Chr19 2,820,133

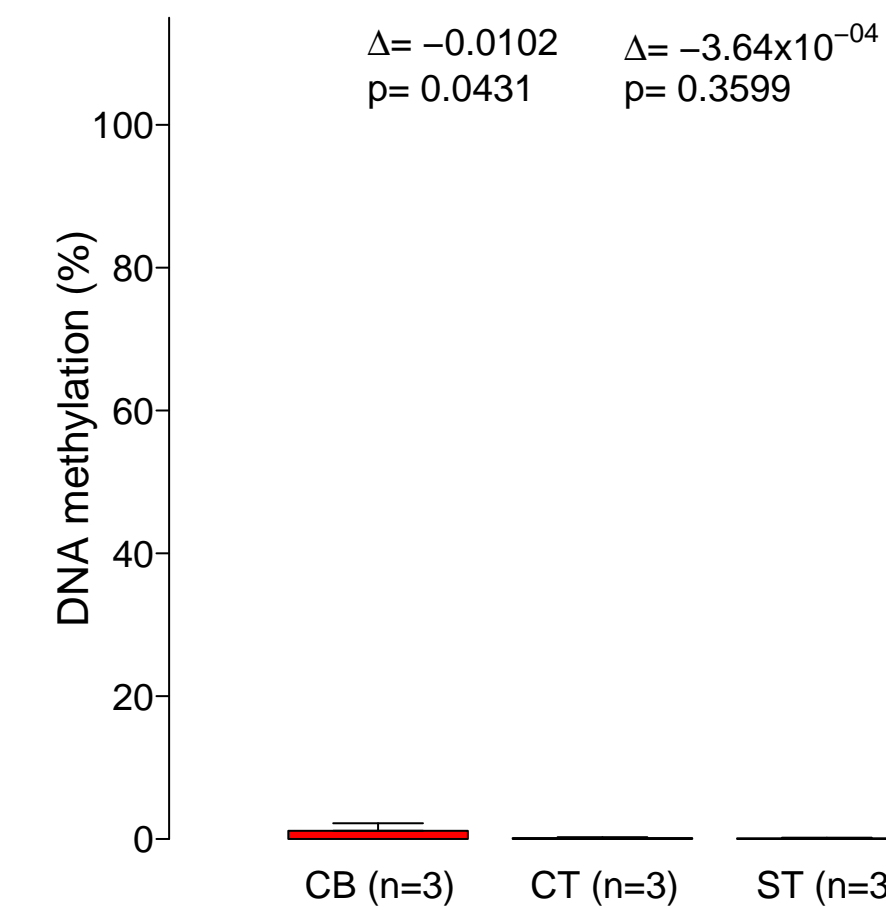

ZNF554 Chr19 2,820,140

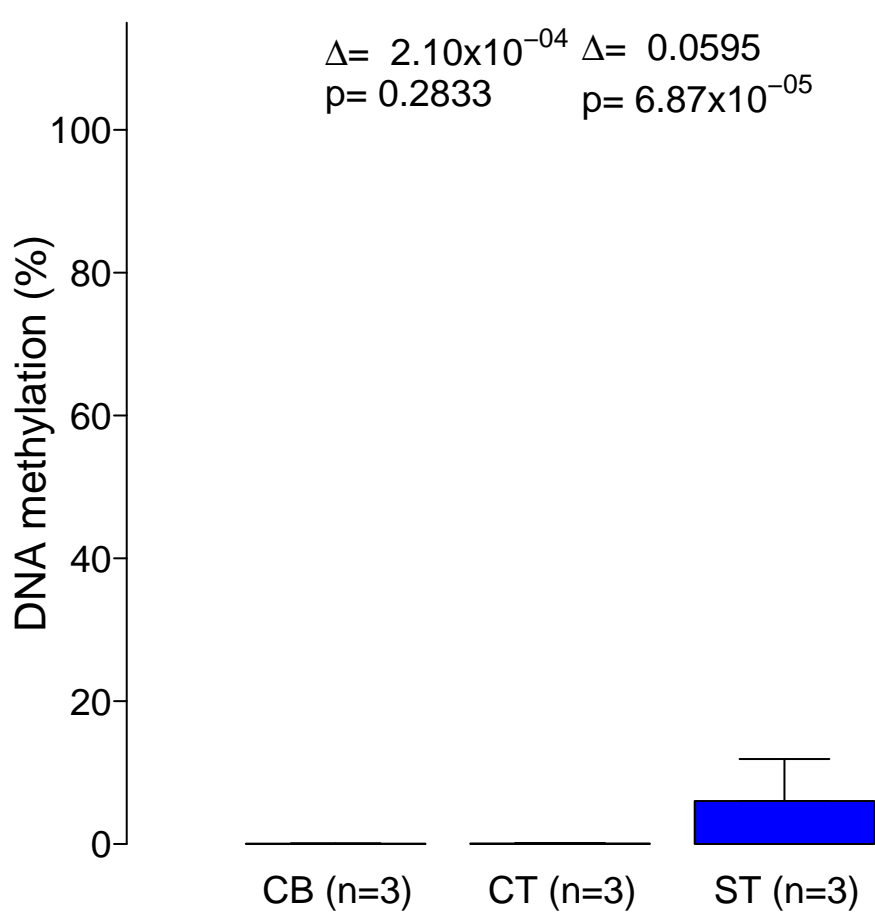

ZNF554 Chr19 2,820,142

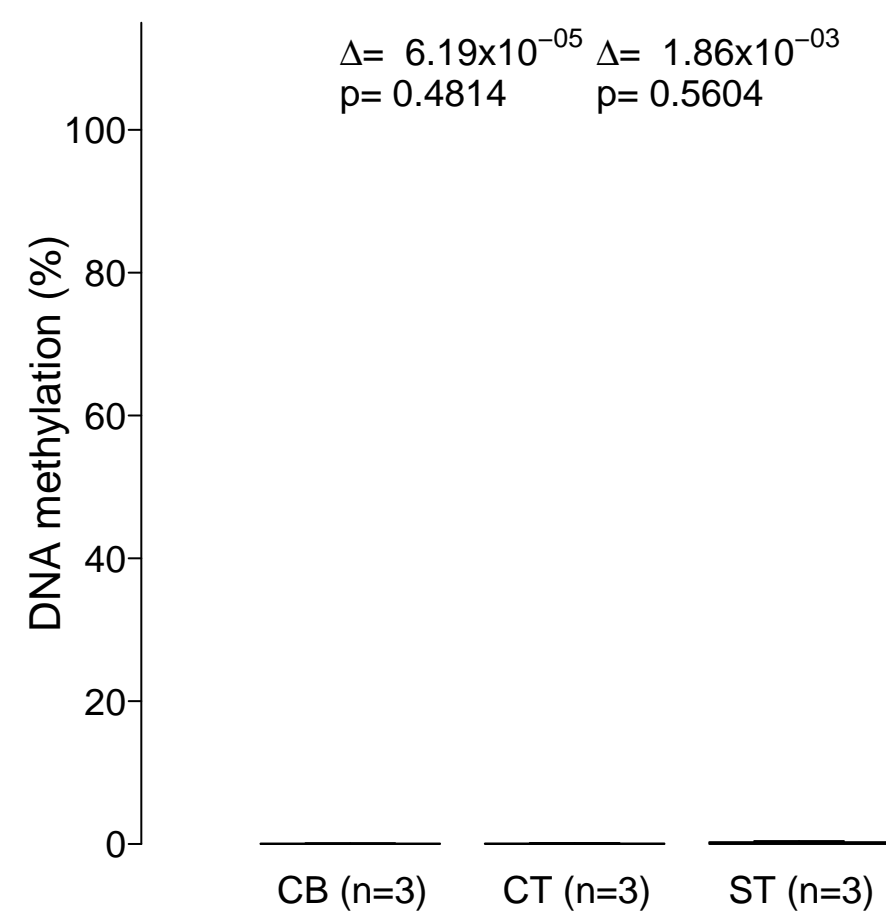

ZNF554 Chr19 2,820,145

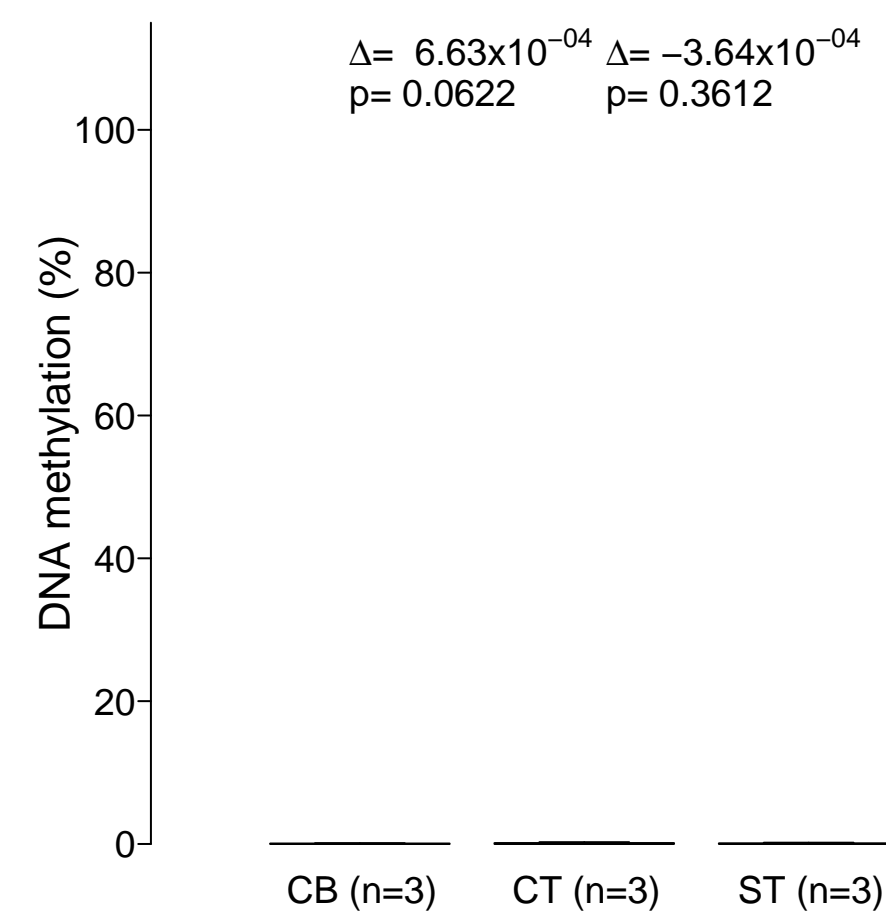

ZNF554 Chr19 2,820,147

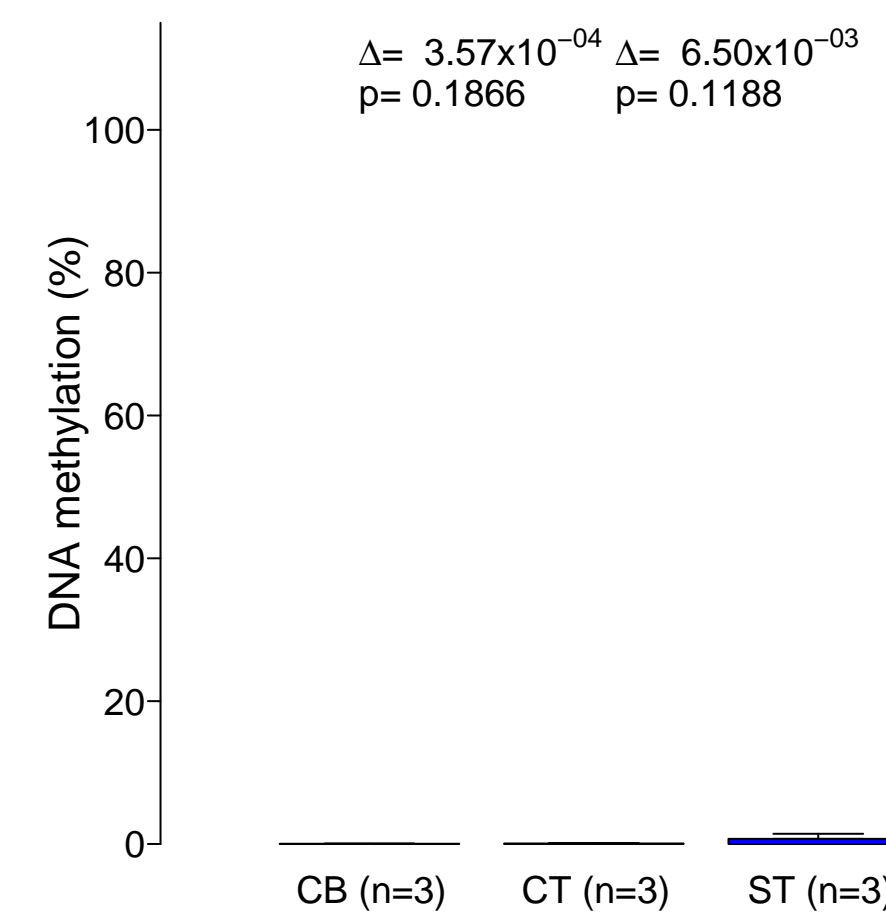

ZNF554 Chr19 2,820,154

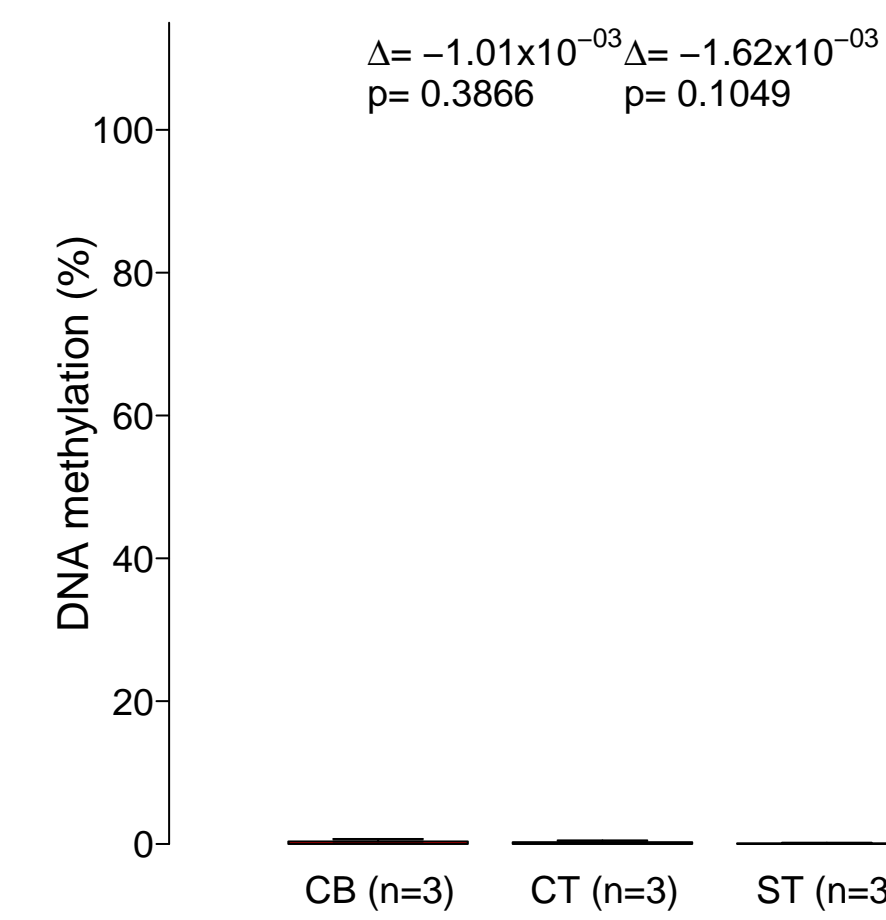

ZNF554 Chr19 2,820,159

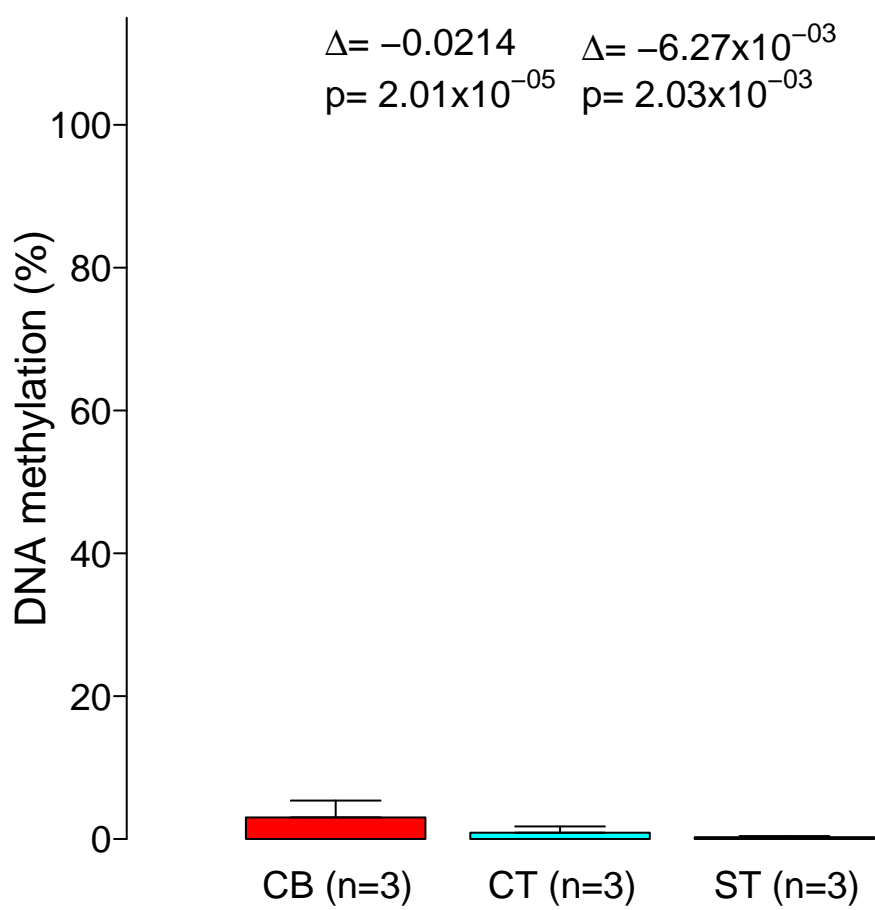

ZNF554 Chr19 2,820,168

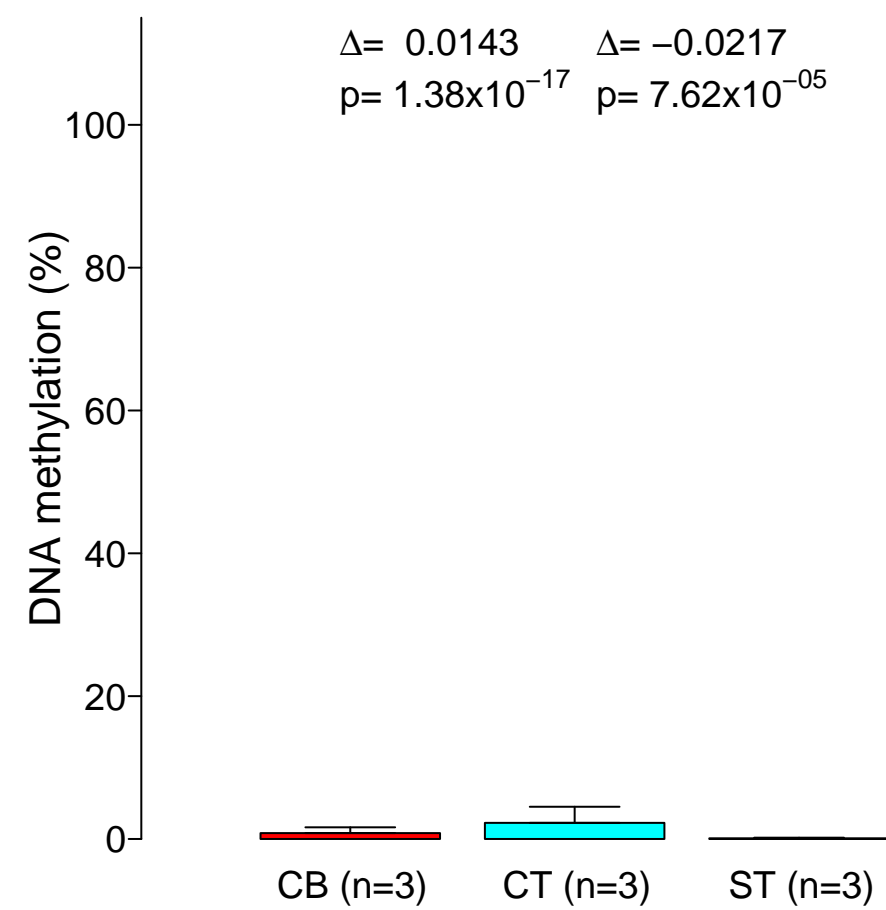

ZNF554 Chr19 2,820,194

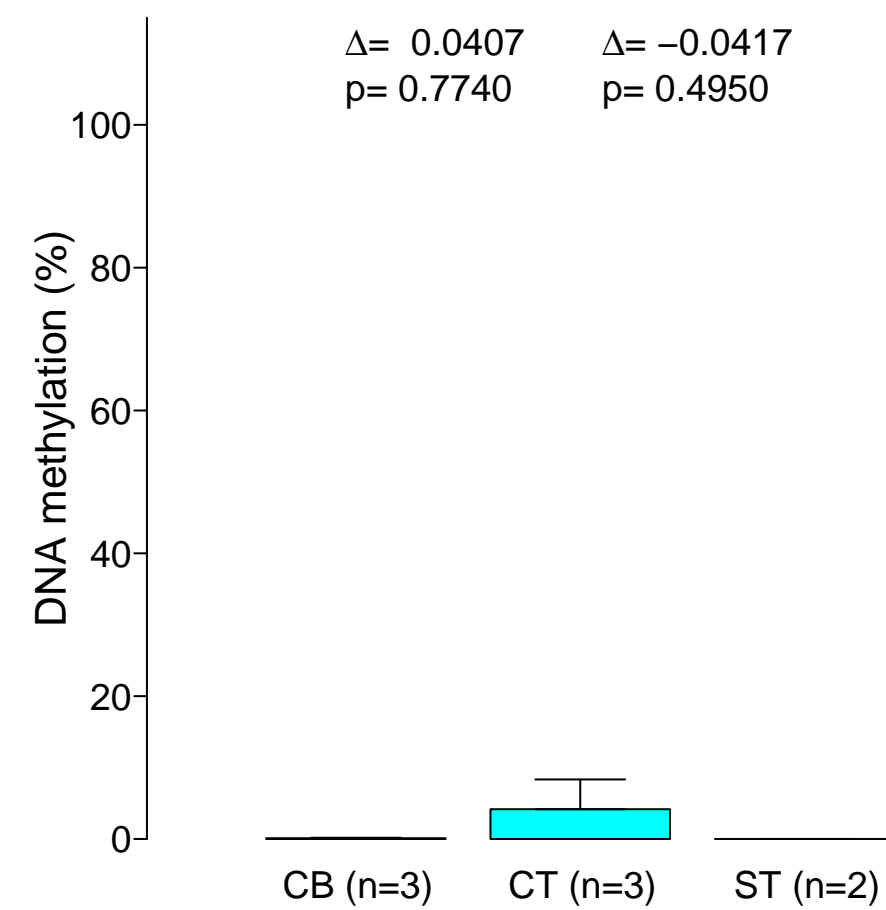

ZNF554 Chr19 2,820,200

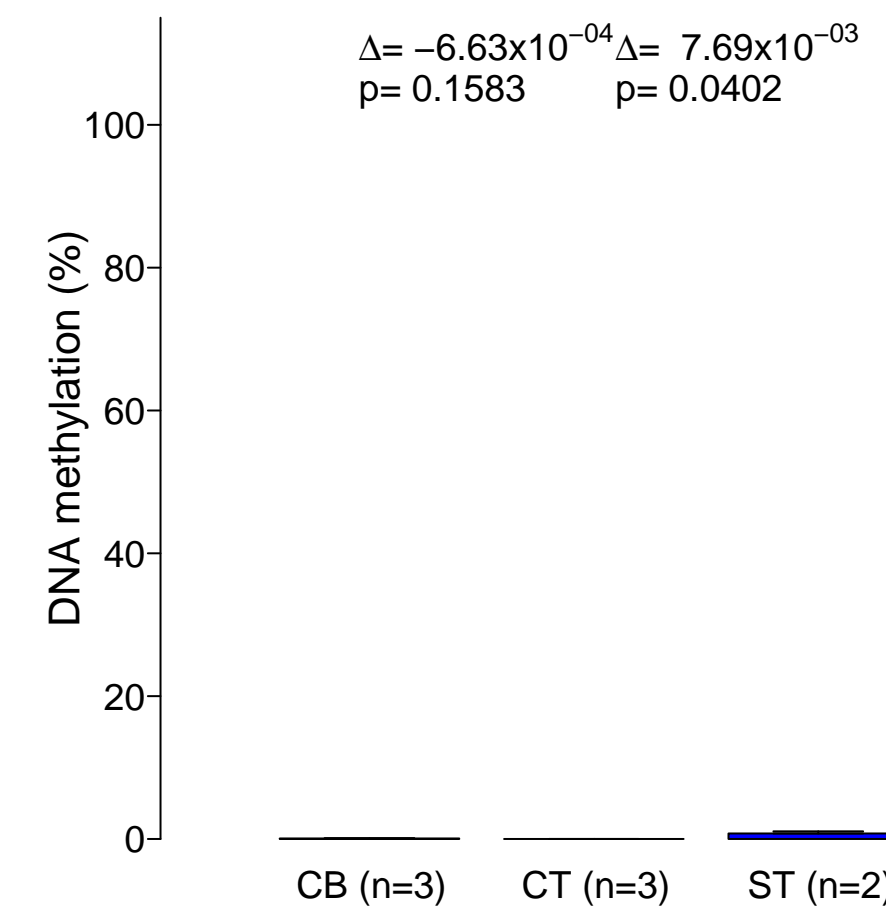

ZNF554 Chr19 2,820,208

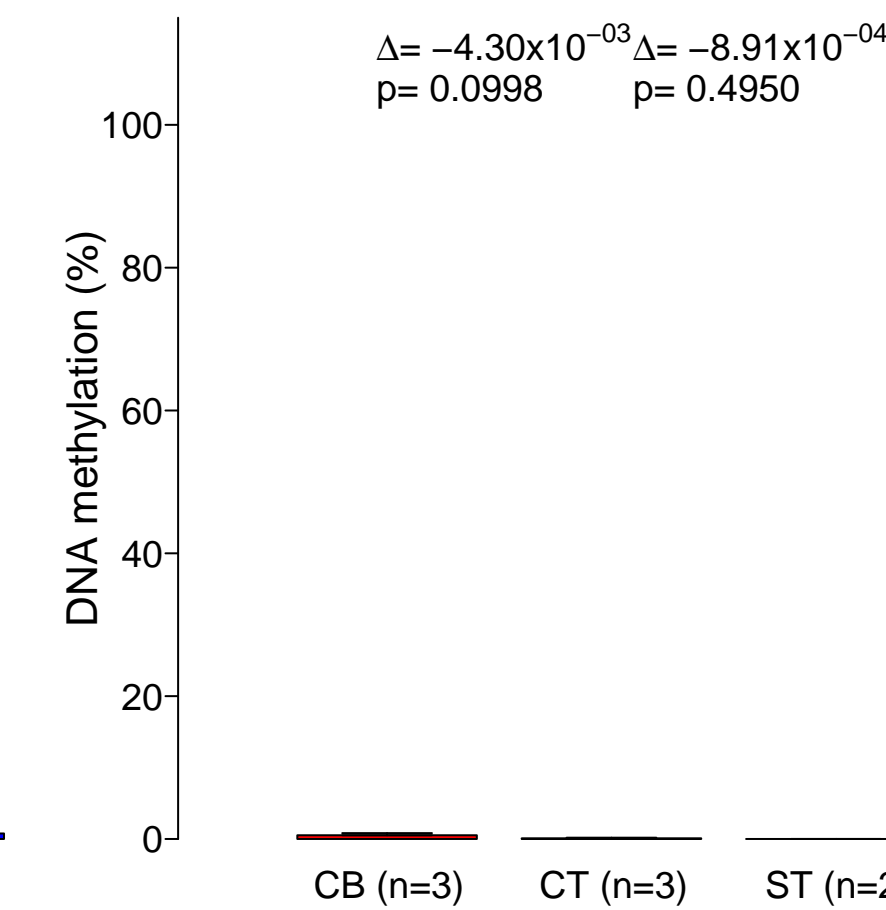

ZNF554 Chr19 2,820,224

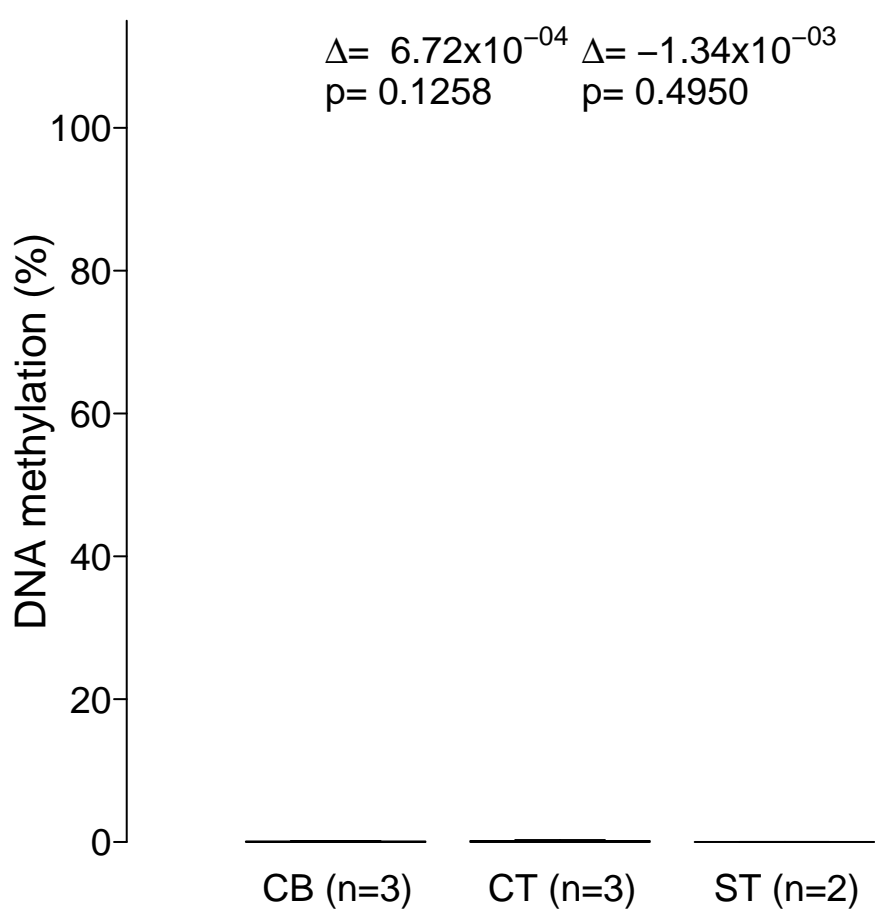

ZNF554 Chr19 2,820,226

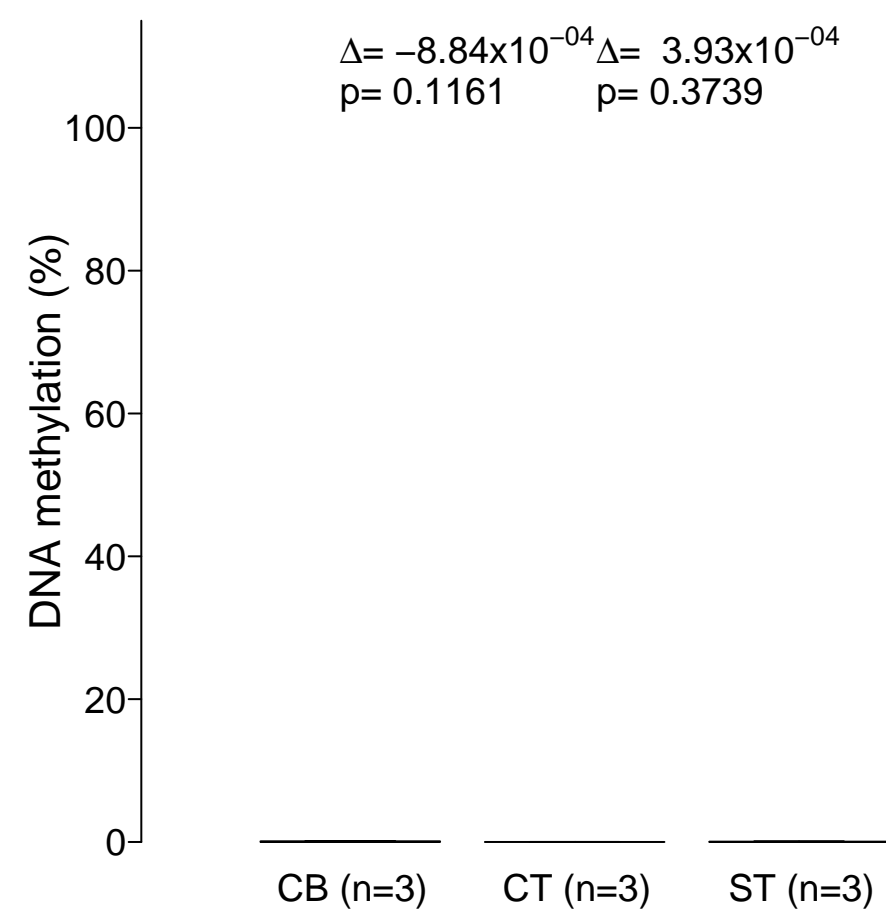

ZNF554 Chr19 2,820,240

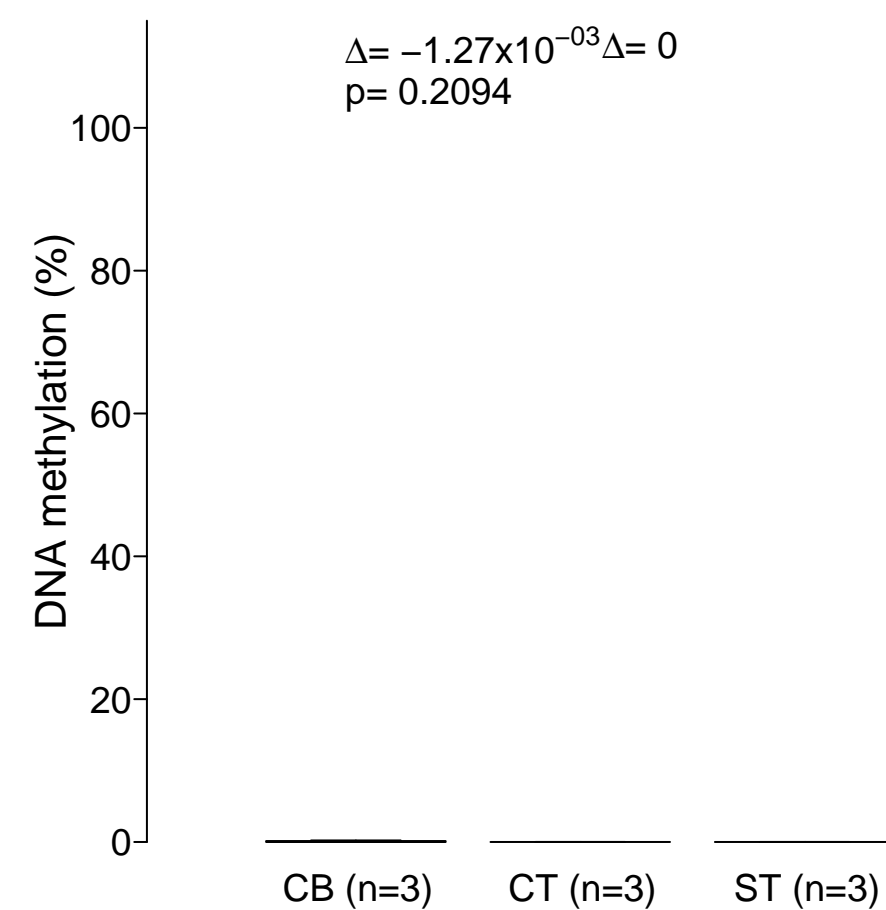

ZNF554 Chr19 2,820,249

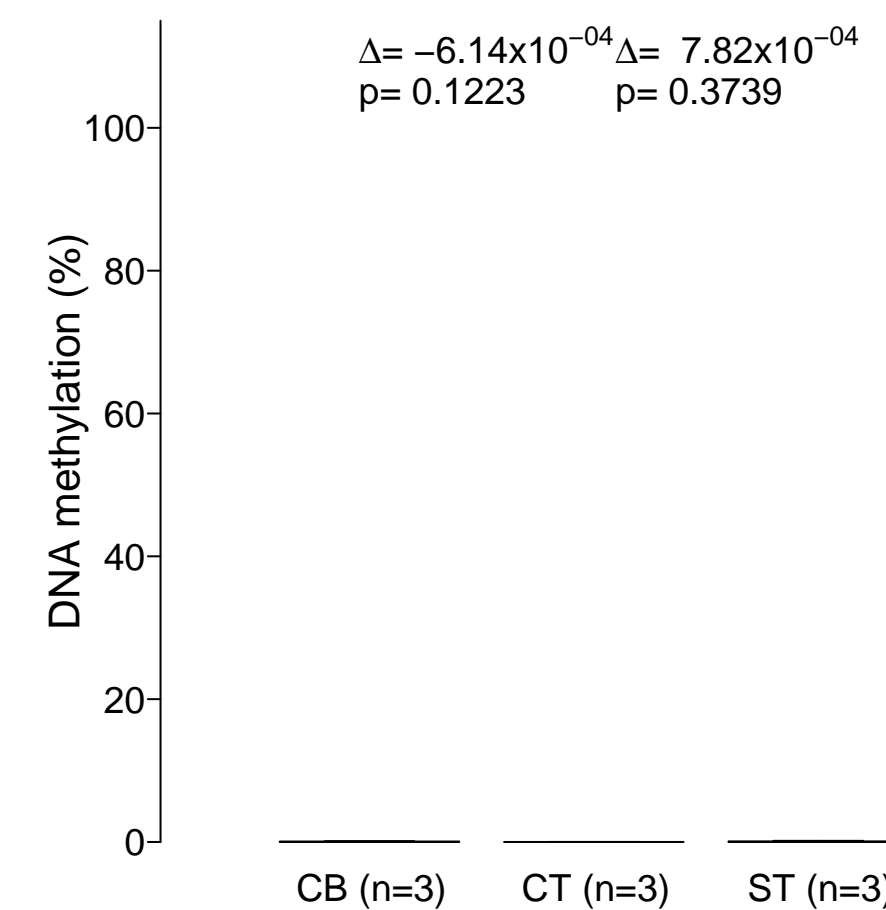

ZNF554 Chr19 2,820,256

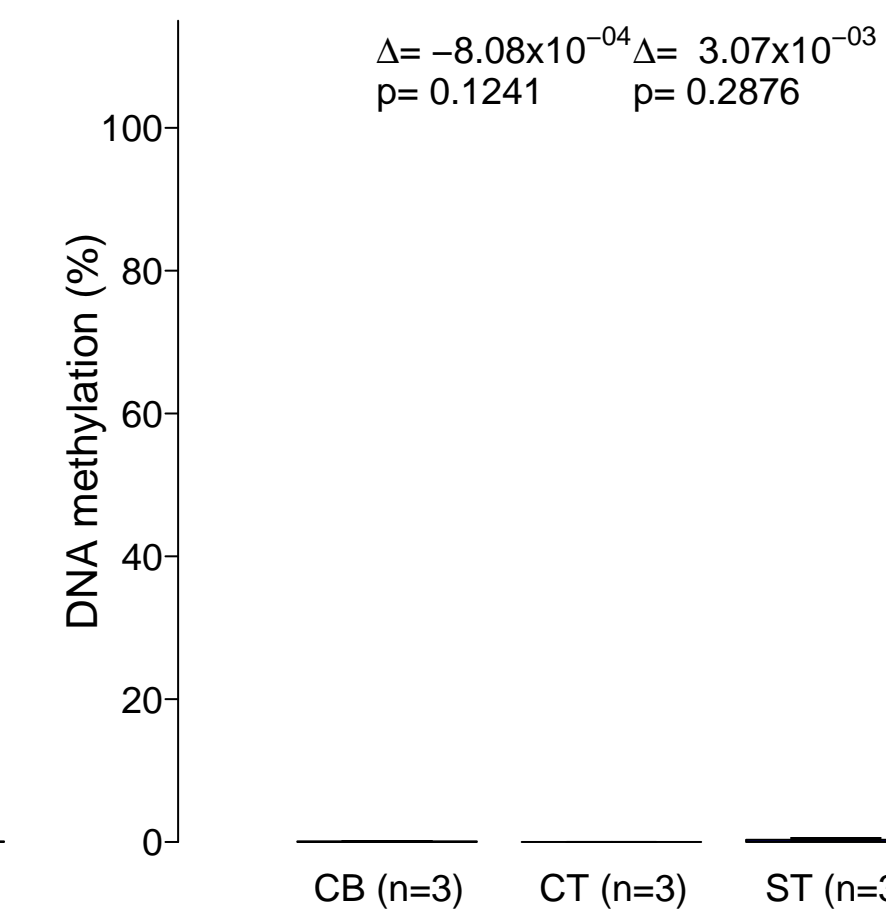

ZNF554 Chr19 2,820,264

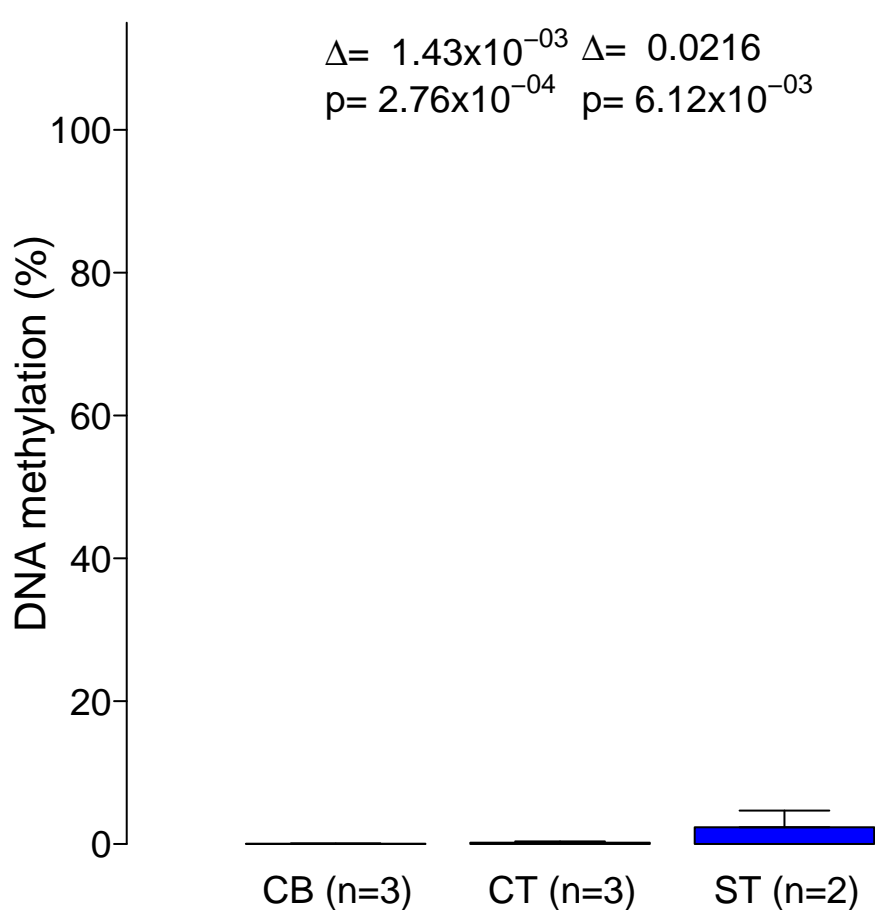

ZNF554 Chr19 2,820,279

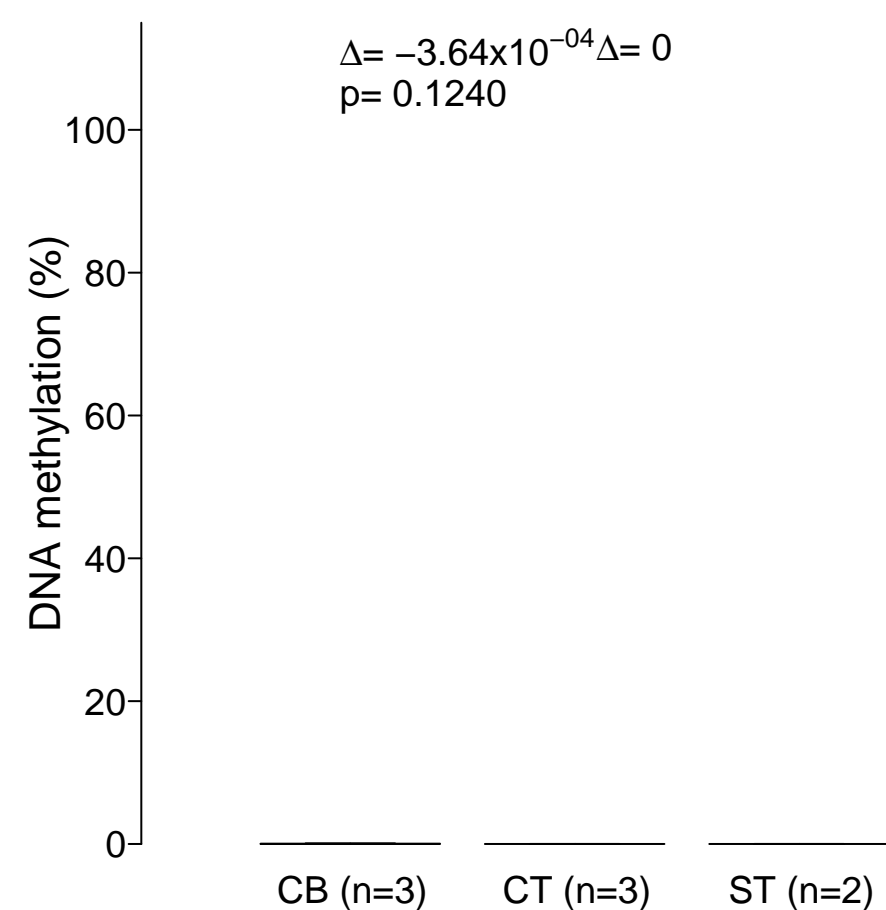

ZNF554 Chr19 2,820,293

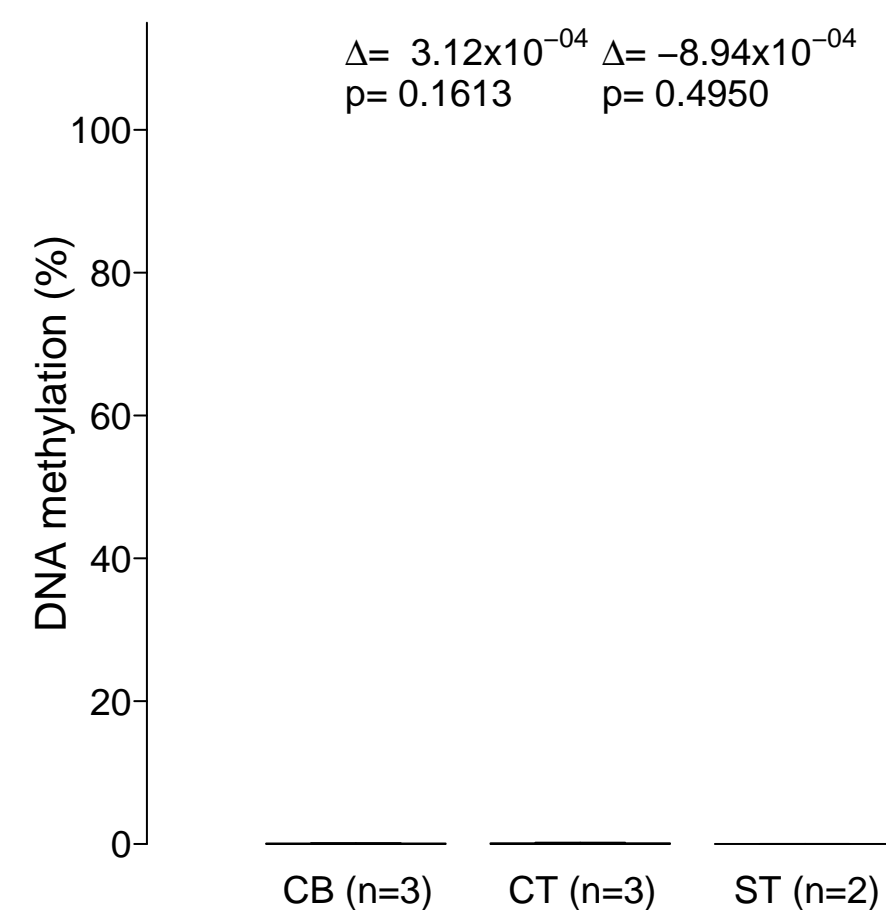

Supplement: Image_12.pdf [file Image_12.pdf]
