# Supplementary material for: Integrated Systems Biology Approach Identifies Novel Maternal and Placental Pathways of Preeclampsia
Source: Front Immunol. 2018 Aug 8;9:1661. doi: 10.3389/fimmu.2018.01661 (PMC6092567; doi:10.3389/fimmu.2018.01661)
Supplement: Figure S6 — Maternal blood proteomic changes in term preeclampsia and their effect on differentially expressed (DE) genes in the placenta. (A) The 14 DE maternal serum proteins in term preeclampsia belong to six functional groups. (B) These 14 proteins have connections with 116 DE placental genes, among which 46 belong to the M2 (red) module. Angiotensinogen has more connections than other proteins (OR = 2.5, p = 1.6 × 10−8) and the most with M2 (red) module genes (n = 35). Seventy seven of 86 connections of angiotensinogen have a directional effect toward the gene. [file Image_6.pdf]

**A**

Diagram illustrating the functional categories and overlaps of various genes/proteins. The categories are represented by colored circles and rectangular labels:

- immune response** (blue circle): C4, CD14, CFB, ITIH2, ITIH4
- vasoconstriction/vasodilation** (red circle): AGT
- angiogenesis** (grey circle): PLG
- ion transport** (green circle): CP, PEDF
- lipid transport/metabolism** (orange circle): GSN, GC, FETUB, HRNR
- miscellaneous** (cyan circle): GSN, GC, FETUB, HRNR
- blood clotting** (black circle): SERPINA3

Key genes/proteins shown in the diagram include: AGT, PLG, C4, CD14, CFB, ITIH2, ITIH4, SERPINA3, CP, PEDF, GSN, GC, FETUB, and HRNR.
