# Supplementary material for: Integrated Systems Biology Approach Identifies Novel Maternal and Placental Pathways of Preeclampsia
Source: PubMed Central journal article supplement (PMC6092567; doi:10.3389/fimmu.2018.01661), 2018-08-08

**A** M1 - green module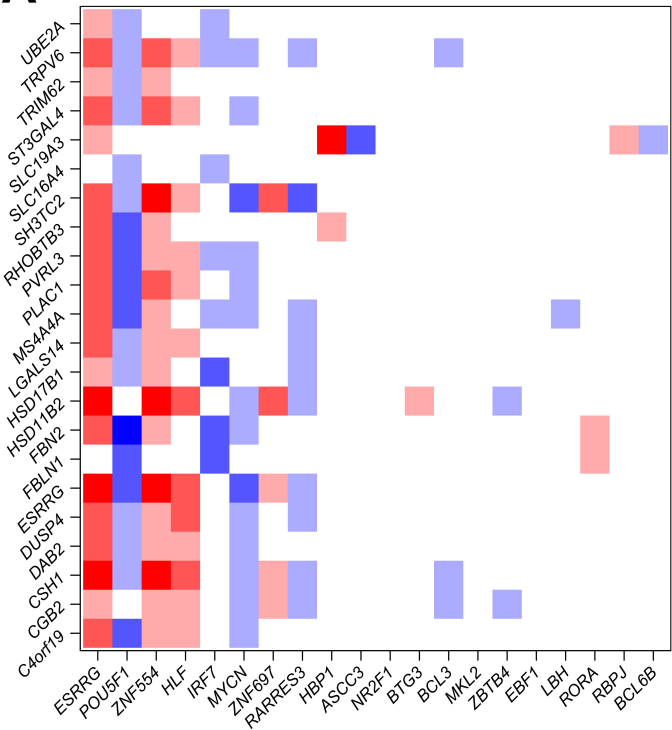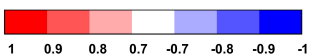**M2 - red module**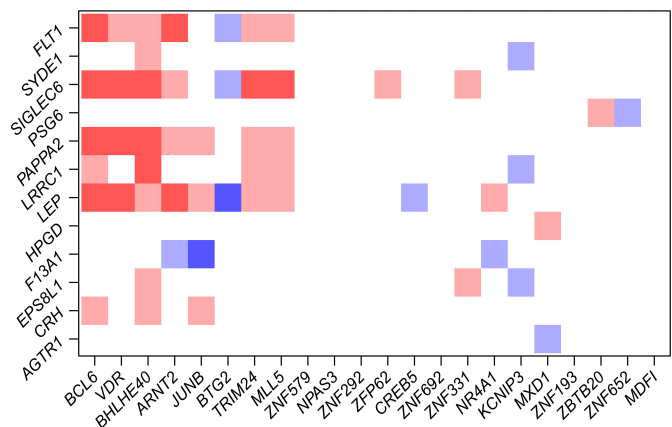**B** ZNF554 co-expression network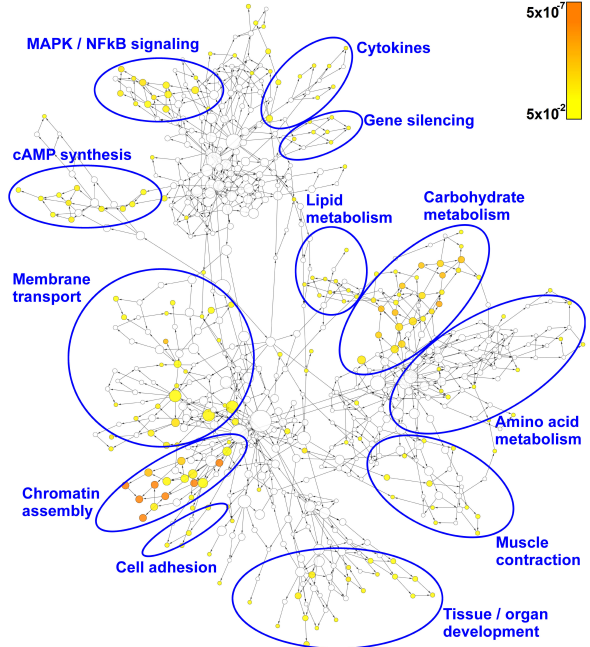**C** BCL6 co-expression network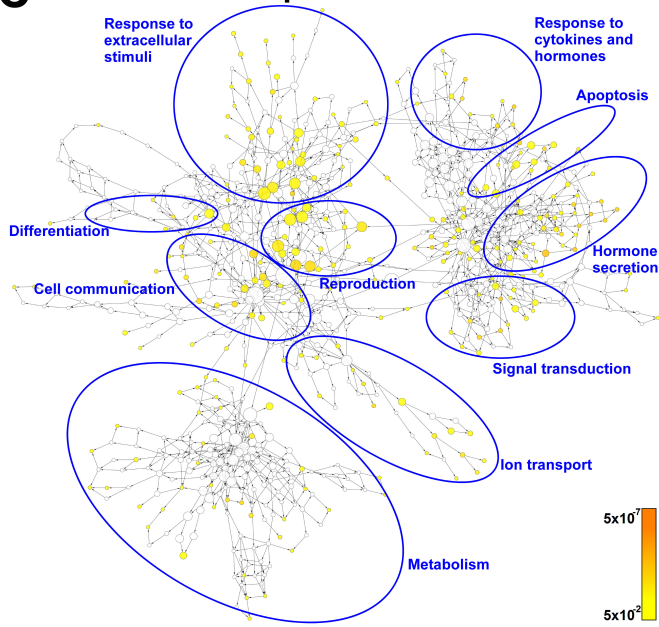

Supplement: Image_1.pdf [file Image_1.pdf]
