# Supplementary material for: Integrated Systems Biology Approach Identifies Novel Maternal and Placental Pathways of Preeclampsia
Source: PubMed Central journal article supplement (PMC6092567; doi:10.3389/fimmu.2018.01661), 2018-08-08

● Control    ● Preeclampsia    ● Preeclampsia + SGA

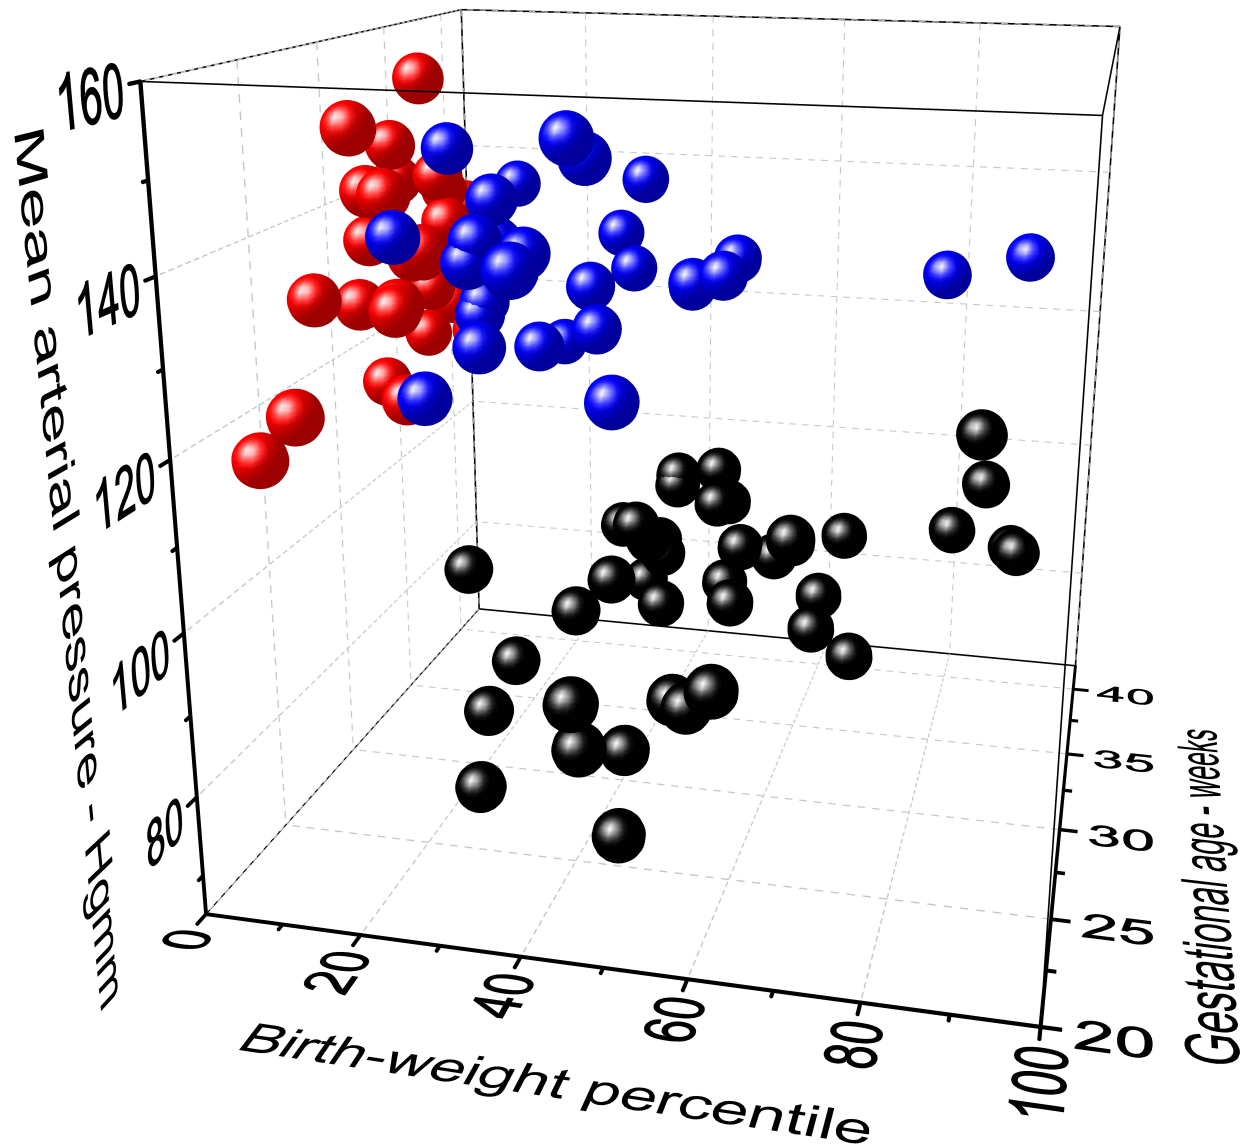

Supplement: Image_2.pdf [file Image_2.pdf]
