# Supplementary material for: Integrated Systems Biology Approach Identifies Novel Maternal and Placental Pathways of Preeclampsia
Source: PubMed Central journal article supplement (PMC6092567; doi:10.3389/fimmu.2018.01661), 2018-08-08

**LEP (1st trimester)**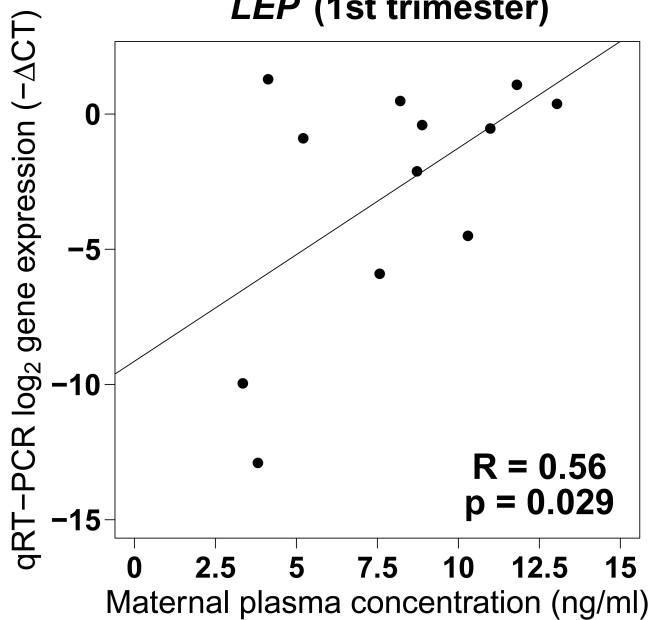**CSH1 (1st trimester)**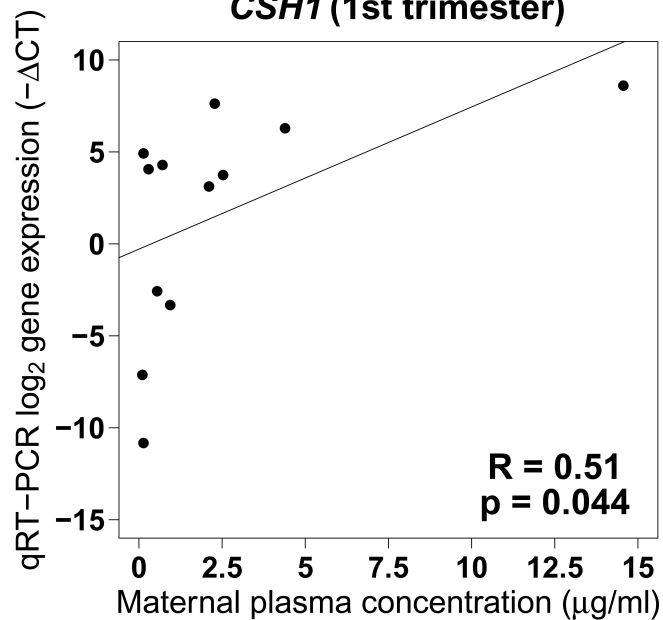**Leptin (3rd trimester)**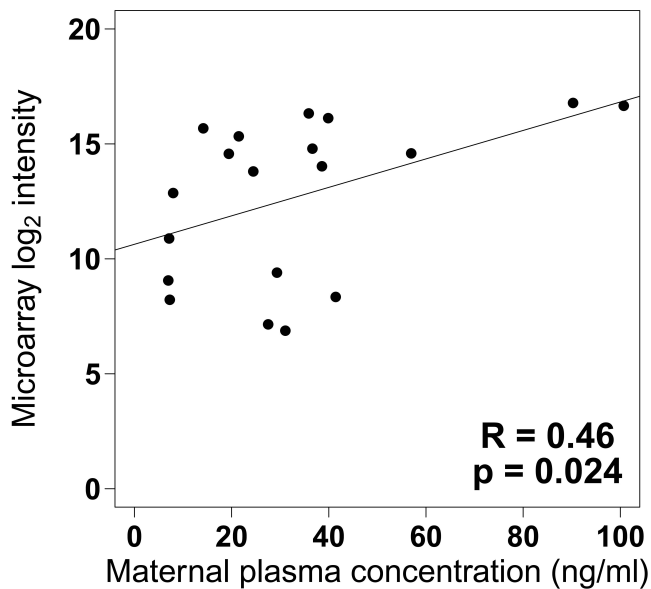**hPL (3rd trimester)**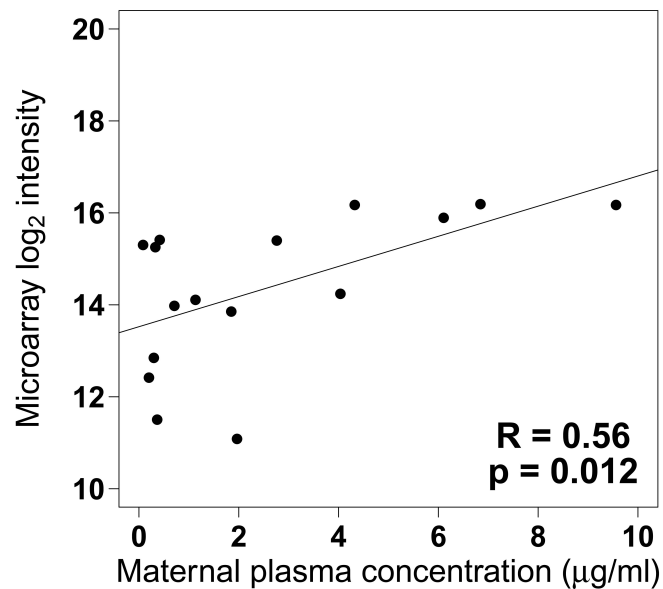

Supplement: Image_4.pdf [file Image_4.pdf]
