# Supplementary material for: Integrated Systems Biology Approach Identifies Novel Maternal and Placental Pathways of Preeclampsia
Source: PubMed Central journal article supplement (PMC6092567; doi:10.3389/fimmu.2018.01661), 2018-08-08
Supplement: Image_7.pdf [file Image_7.pdf]

Abnormal trophoblast differentiation

Epigenetic mechanisms

Placental ischemia

Maternal factors

(e.g. angiotensinogen)

- M1 (green) module genes
- *CGB, ENG, FLT1*
- M2 (red) module hub genes (*BCL6, JUNB*)

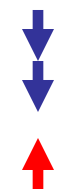

preterm preeclampsia +/- SGA

Onset of maternal circulation to placenta

**BCL6**

↑ ischemia

- M2 (red) module genes
- M1 (green) module genes

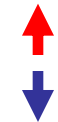

preterm preeclampsia

**ARNT2**

↑ hypoxia  
ischemia

- M2 (red) module genes (*ENG, FLT1, LEP*)

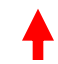

preterm preeclampsia +/- SGA

- *CGB, M2 (red) module genes (*JUNB, FLT1, LEP*)*

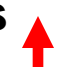

preeclampsia +/- SGA
